# Supplementary material for: DELTA50: A Highly Accurate Database of Experimental 1H and 13C NMR Chemical Shifts Applied to DFT Benchmarking
Source: MDPI journal article supplement (doi:10.3390/molecules28062449), 2023-03-07
Supplement: s1 [file s1]

## Supporting Information

### DELTA50: A Highly Accurate Database of Experimental $^1\text{H}$ and $^{13}\text{C}$ NMR Chemical Shifts Applied to DFT Benchmarking

Ryan D. Cohen,<sup>1,2,\*</sup> Jared S. Wood,<sup>1,3</sup> Yu-Hong Lam,<sup>1</sup> Alexei V. Buevich,<sup>1</sup> Edward C. Sherer,<sup>1</sup> Mikhail Reibarkh,<sup>1</sup> R. Thomas Williamson,<sup>3</sup> and Gary E. Martin<sup>2</sup>

<sup>1</sup> Merck & Co., Inc., Rahway, NJ 07065, USA

<sup>2</sup> Chemistry and Biochemistry, Seton Hall University, South Orange, NJ 07079, USA

<sup>3</sup> Department of Chemistry and Biochemistry, University of North Carolina Wilmington, Wilmington, NC 28409, USA

\* Correspondence: ryan.cohen@merck.com

#### Table of Contents

|      |                                                                                                                                 |     |
|------|---------------------------------------------------------------------------------------------------------------------------------|-----|
| I.   | DFT-Optimized Cartesian Coordinates for DELTA50 Compounds.....                                                                  | 3   |
| II.  | Experimental NMR Spectra for DELTA50 Compounds .....                                                                            | 40  |
| III. | Probe Set NMR Data.....                                                                                                         | 151 |
|      | Table S1. Comparison of DFT $\delta_{\text{H}}$ and $\delta_{\text{C}}$ predictions for <b>bicyclo[2.1.1]hexan-2-one</b> .....  | 151 |
|      | Table S2. Comparison of DFT $\delta_{\text{H}}$ and $\delta_{\text{C}}$ predictions for <b><math>\alpha</math>-pinene</b> ..... | 152 |
|      | Table S3. Comparison of DFT $\delta_{\text{H}}$ and $\delta_{\text{C}}$ predictions for <b>aquatolide</b> .....                 | 153 |
|      | Table S4. Comparison of DFT $\delta_{\text{H}}$ and $\delta_{\text{C}}$ predictions for <b>naupliolide</b> .....                | 154 |
|      | Table S5. Comparison of DFT $\delta_{\text{H}}$ and $\delta_{\text{C}}$ predictions for <b>echinopine B</b> .....               | 155 |
|      | Table S6. Comparison of DFT $\delta_{\text{H}}$ and $\delta_{\text{C}}$ predictions for <b>parthenolide</b> .....               | 156 |
|      | Table S7. Comparison of DFT $\delta_{\text{H}}$ and $\delta_{\text{C}}$ predictions for <b>diepoxyguaiaolide</b> .....          | 157 |
|      | Table S8. Comparison of DFT $\delta_{\text{H}}$ and $\delta_{\text{C}}$ predictions for <b>cannabicitran (CBT-C)</b> .....      | 158 |
|      | Table S9. Comparison of DFT $\delta_{\text{H}}$ and $\delta_{\text{C}}$ predictions for <b>ingenane diterpene 8</b> .....       | 159 |
|      | Table S10. Comparison of DFT $\delta_{\text{H}}$ and $\delta_{\text{C}}$ predictions for <b>artemisinin</b> .....               | 160 |
|      | Table S11. Comparison of DFT $\delta_{\text{H}}$ and $\delta_{\text{C}}$ predictions for <b>nobilisitin A</b> .....             | 161 |
|      | Table S12. Comparison of DFT $\delta_{\text{H}}$ and $\delta_{\text{C}}$ predictions for <b>intricarene</b> .....               | 162 |
|      | Table S13. Comparison of DFT $\delta_{\text{H}}$ and $\delta_{\text{C}}$ predictions for <b>strychnine</b> .....                | 163 |
|      | Table S14. Comparison of DFT $\delta_{\text{H}}$ and $\delta_{\text{C}}$ predictions for <b>holstiine</b> .....                 | 164 |
|      | Table S15. Comparison of DFT $\delta_{\text{H}}$ and $\delta_{\text{C}}$ predictions for <b>colchicine</b> .....                | 165 |
|      | Table S16. Comparison of DFT $\delta_{\text{H}}$ and $\delta_{\text{C}}$ predictions for <b>hexacyclinol</b> .....              | 166 |

|                                                                                                                                             |     |
|---------------------------------------------------------------------------------------------------------------------------------------------|-----|
| <b>Table S17.</b> Comparison of DFT $\delta_{\text{H}}$ and $\delta_{\text{C}}$ predictions for <b>homodimericin A</b> .....                | 167 |
| <b>Table S18.</b> Comparison of DFT $\delta_{\text{H}}$ predictions for <b>strychnobaillonine</b> .....                                     | 168 |
| <b>Table S19.</b> Comparison of DFT $\delta_{\text{C}}$ predictions for <b>strychnobaillonine</b> .....                                     | 169 |
| <b>Table S20.</b> Comparison of DFT $\delta_{\text{H}}$ predictions for <b>sungucine</b> .....                                              | 170 |
| <b>Table S21.</b> Comparison of DFT $\delta_{\text{C}}$ predictions for <b>sungucine</b> .....                                              | 171 |
| <b>Table S22.</b> Comparison of DFT $\delta_{\text{H}}$ and $\delta_{\text{C}}$ predictions for <b>paclitaxel</b> .....                     | 172 |
| <b>Table S22 (continued).</b> Comparison of DFT $\delta_{\text{H}}$ and $\delta_{\text{C}}$ predictions for <b>paclitaxel</b> .....         | 173 |
| <b>Table S23.</b> Comparison of DFT $\delta_{\text{H}}$ and $\delta_{\text{C}}$ predictions for <b>sungucine</b> versus its 5'-epimer ..... | 174 |
| IV. Homodimericin A NMR Spectra.....                                                                                                        | 175 |
| V. Probe Set Geometries .....                                                                                                               | 182 |
| VI. Density Functionals and Basis Sets Employed .....                                                                                       | 275 |
| VII. References .....                                                                                                                       | 279 |

## I. DFT-Optimized Cartesian Coordinates for DELTA50 Compounds

Optimized geometries *in vacuo* at the B3LYP/6-31G(d) level from Gaussian 16, Revision C.01 [1] for each compound in the DELTA50 training set are provided below. Optimized coordinates of the dominant conformer ( $\geq 98\%$ ) are provided. Experimental proton and carbon chemical shifts were referenced to TMS at 0.00 ppm (see acquired spectra in Section II).

For conformer determinations and Boltzmann weightings, a mixed torsional, low-mode sampling search in MacroModel was performed with the OPLS4 force field [2], as implemented in Schrodinger software suite, version 2021-1 [3]. DFT Gibbs free energies were then calculated at the level of M06-2X/6-31+G(d,p) including the SMD solvent model for chloroform. The Boltzmann probabilities were calculated using the following equation.

$$p_i = \frac{e^{-\varepsilon_i/kT}}{\sum_{j=1}^M e^{-\varepsilon_j/kT}}$$

where  $p_i$  is the probability of the  $i^{\text{th}}$  state

$\varepsilon_i$  is the energy of the  $i^{\text{th}}$  state

$k$  is the Boltzmann constant

$T$  is temperature

$M$  is the number of states

### Compound 1: Nitromethane

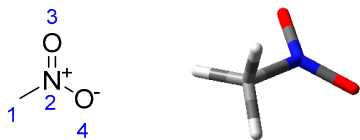

| Atom # | Carbon Attachment | Atom | Calculated Atomic Coordinates |           |           | Experimental $\delta$ (ppm) |
|--------|-------------------|------|-------------------------------|-----------|-----------|-----------------------------|
|        |                   |      | x                             | y         | z         |                             |
| 1      | -                 | C    | -1.325474                     | -0.000005 | -0.002538 | 62.49                       |
| 2      | -                 | N    | 0.174089                      | 0.000000  | -0.011776 | -                           |
| 3      | -                 | O    | 0.731302                      | 1.092955  | 0.003254  | -                           |
| 4      | -                 | O    | 0.731302                      | -1.092950 | 0.003254  | -                           |
| 5      | C1                | H    | -1.665785                     | -0.906616 | -0.499708 | 4.33                        |
| 6      | C1                | H    | -1.665789                     | 0.906569  | -0.499774 | 4.33                        |
| 7      | C1                | H    | -1.635114                     | 0.000035  | 1.045083  | 4.33                        |

### Compound 2: Nitroethane

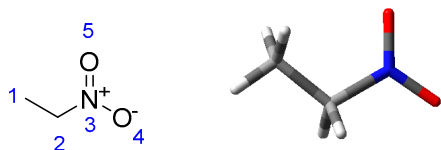

| Atom # | Carbon Attachment | Atom | Calculated Atomic Coordinates |           |           | Experimental $\delta$ (ppm) |
|--------|-------------------|------|-------------------------------|-----------|-----------|-----------------------------|
|        |                   |      | x                             | y         | z         |                             |
| 1      | -                 | C    | -1.878328                     | 0.098482  | -0.000511 | 12.31                       |
| 2      | -                 | C    | -0.627705                     | -0.758597 | 0.000661  | 70.47                       |
| 3      | -                 | N    | 0.654059                      | 0.052770  | 0.000123  | -                           |
| 4      | -                 | O    | 1.697683                      | -0.592331 | -0.000557 | -                           |
| 5      | -                 | O    | 0.570845                      | 1.276342  | 0.000288  | -                           |
| 6      | C1                | H    | -2.754961                     | -0.558268 | -0.000005 | 1.59                        |
| 7      | C1                | H    | -1.922726                     | 0.738517  | 0.884010  | 1.59                        |
| 8      | C1                | H    | -1.922383                     | 0.736632  | -0.886423 | 1.59                        |
| 9      | C2                | H    | -0.544965                     | -1.399815 | -0.880815 | 4.42                        |
| 10     | C2                | H    | -0.545407                     | -1.397857 | 0.883625  | 4.42                        |

### Compound 3: Acetaldehyde

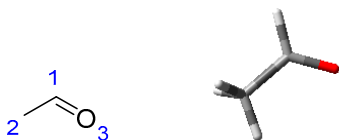

| Atom # | Carbon Attachment | Atom | Calculated Atomic Coordinates |           |           | Experimental $\delta$ (ppm) |
|--------|-------------------|------|-------------------------------|-----------|-----------|-----------------------------|
|        |                   |      | x                             | y         | z         |                             |
| 1      | -                 | C    | 0.234239                      | 0.399962  | -0.000002 | 199.97                      |
| 2      | -                 | C    | -1.171113                     | -0.148450 | 0.000001  | 30.99                       |
| 3      | -                 | O    | 1.237659                      | -0.277271 | 0.000001  | -                           |
| 4      | C1                | H    | 0.302577                      | 1.512156  | 0.000003  | 9.80                        |
| 5      | C2                | H    | -1.713937                     | 0.218871  | -0.880943 | 2.21                        |
| 6      | C2                | H    | -1.154729                     | -1.240768 | -0.000028 | 2.21                        |
| 7      | C2                | H    | -1.713936                     | 0.218830  | 0.880963  | 2.21                        |



Compound 4: Oxirane

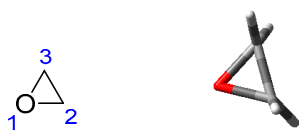

| Atom # | Carbon Attachment | Atom | Calculated Atomic Coordinates |           |           | Experimental $\delta$ (ppm) |
|--------|-------------------|------|-------------------------------|-----------|-----------|-----------------------------|
|        |                   |      | x                             | y         | z         |                             |
| 1      | -                 | O    | 0.000001                      | 0.855353  | 0.000000  | -                           |
| 2      | -                 | C    | -0.734442                     | -0.371867 | -0.000001 | 40.94                       |
| 3      | -                 | C    | 0.734441                      | -0.371867 | 0.000001  | 40.94                       |
| 4      | C3                | H    | 1.274772                      | -0.595107 | 0.920457  | 2.69                        |
| 5      | C3                | H    | 1.274774                      | -0.595106 | -0.920455 | 2.69                        |
| 6      | C2                | H    | -1.274772                     | -0.595105 | -0.920458 | 2.69                        |
| 7      | C2                | H    | -1.274775                     | -0.595106 | 0.920454  | 2.69                        |

Compound 5: Acetonitrile

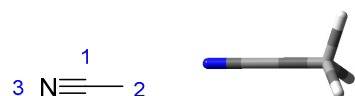

| Atom # | Carbon Attachment | Atom | Calculated Atomic Coordinates |           |           | Experimental $\delta$ (ppm) |
|--------|-------------------|------|-------------------------------|-----------|-----------|-----------------------------|
|        |                   |      | x                             | y         | z         |                             |
| 1      | -                 | C    | 0.280559                      | 0.000022  | 0.000032  | 116.33                      |
| 2      | -                 | C    | -1.181127                     | -0.000005 | -0.000006 | 1.91                        |
| 3      | -                 | N    | 1.440866                      | -0.000010 | -0.000013 | -                           |
| 4      | C2                | H    | -1.560884                     | -0.950715 | 0.387217  | 2.01                        |
| 5      | C2                | H    | -1.560927                     | 0.810703  | 0.629685  | 2.01                        |
| 6      | C2                | H    | -1.560842                     | 0.139978  | -1.016971 | 2.01                        |

### Compound 6: Cyclopropane

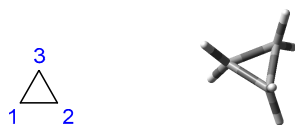

| Atom # | Carbon Attachment | Atom | Calculated Atomic Coordinates |           |           | Experimental $\delta$ (ppm) |
|--------|-------------------|------|-------------------------------|-----------|-----------|-----------------------------|
|        |                   |      | x                             | y         | z         |                             |
| 1      | -                 | C    | -0.492427                     | -0.718224 | 0.000003  | -3.15                       |
| 2      | -                 | C    | -0.375776                     | 0.785563  | -0.000007 | -3.15                       |
| 3      | -                 | C    | 0.868266                      | -0.067308 | 0.000002  | -3.15                       |
| 4      | C1                | H    | -0.827012                     | -1.206263 | 0.911497  | 0.25                        |
| 5      | C1                | H    | -0.827011                     | -1.206266 | -0.911490 | 0.25                        |
| 6      | C3                | H    | 1.458202                      | -0.113027 | -0.911499 | 0.25                        |
| 7      | C3                | H    | 1.458179                      | -0.113014 | 0.911519  | 0.25                        |
| 8      | C2                | H    | -0.631365                     | 1.319196  | 0.911510  | 0.25                        |
| 9      | C2                | H    | -0.631371                     | 1.319189  | -0.911526 | 0.25                        |

### Compound 7: Acetone

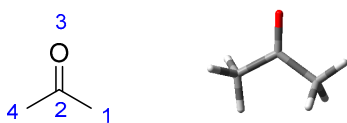

| Atom # | Carbon Attachment | Atom | Calculated Atomic Coordinates |           |           | Experimental $\delta$ (ppm) |
|--------|-------------------|------|-------------------------------|-----------|-----------|-----------------------------|
|        |                   |      | x                             | y         | z         |                             |
| 1      | -                 | C    | 1.293088                      | -0.614813 | 0.000004  | 30.94                       |
| 2      | -                 | C    | -0.000003                     | 0.185303  | 0.000026  | 206.93                      |
| 3      | -                 | O    | 0.000030                      | 1.400974  | -0.000010 | -                           |
| 4      | -                 | C    | -1.293122                     | -0.614774 | -0.000013 | 30.94                       |
| 5      | C1                | H    | -1.341564                     | -1.267122 | 0.881099  | 2.17                        |
| 6      | C1                | H    | -2.148522                     | 0.063608  | -0.000211 | 2.17                        |
| 7      | C1                | H    | -1.341318                     | -1.267479 | -0.880857 | 2.17                        |
| 8      | C4                | H    | 1.341193                      | -1.267740 | 0.880691  | 2.17                        |
| 9      | C4                | H    | 1.341663                      | -1.266896 | -0.881290 | 2.17                        |
| 10     | C4                | H    | 2.148524                      | 0.063541  | 0.000546  | 2.17                        |

### Compound 8: Oxetane

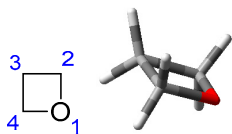

| Atom # | Carbon Attachment | Atom | Calculated Atomic Coordinates |           |           | Experimental $\delta$ (ppm) |
|--------|-------------------|------|-------------------------------|-----------|-----------|-----------------------------|
|        |                   |      | x                             | y         | z         |                             |
| 1      | -                 | O    | 0.000000                      | -1.072579 | 0.000125  | -                           |
| 2      | -                 | C    | 1.036814                      | -0.064801 | -0.000084 | 72.55                       |
| 3      | -                 | C    | -0.000000                     | 1.077698  | 0.000082  | 22.35                       |
| 4      | -                 | C    | -1.036814                     | -0.064801 | -0.000084 | 72.55                       |
| 5      | C2                | H    | 1.672620                      | -0.132539 | 0.892519  | 4.76                        |
| 6      | C2                | H    | 1.672232                      | -0.132514 | -0.892972 | 4.76                        |
| 7      | C3                | H    | -0.000000                     | 1.710902  | 0.890879  | 2.70                        |
| 8      | C3                | H    | -0.000000                     | 1.711261  | -0.890459 | 2.70                        |
| 9      | C4                | H    | -1.672620                     | -0.132539 | 0.892519  | 4.76                        |
| 10     | C4                | H    | -1.672232                     | -0.132514 | -0.892972 | 4.76                        |

### Compound 9: Methyl acetate

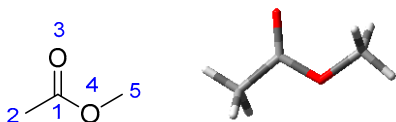

| Atom # | Carbon Attachment | Atom | Calculated Atomic Coordinates <sup>a</sup> |           |           | Experimental $\delta$ (ppm) |
|--------|-------------------|------|--------------------------------------------|-----------|-----------|-----------------------------|
|        |                   |      | x                                          | y         | z         |                             |
| 1      | -                 | C    | 0.000000                                   | 0.493825  | 0.000000  | 171.55                      |
| 2      | -                 | C    | -1.133612                                  | 1.492846  | 0.000000  | 20.71                       |
| 3      | -                 | O    | 1.180758                                   | 0.763097  | 0.000000  | -                           |
| 4      | -                 | O    | -0.476542                                  | -0.773738 | 0.000000  | -                           |
| 5      | -                 | C    | 0.523356                                   | -1.804412 | 0.000000  | 51.62                       |
| 6      | C2                | H    | -1.765505                                  | 1.345823  | 0.882046  | 2.06                        |
| 7      | C2                | H    | -0.725713                                  | 2.504101  | 0.000000  | 2.06                        |
| 8      | C2                | H    | -1.765505                                  | 1.345823  | -0.882046 | 2.06                        |
| 9      | C5                | H    | -0.026169                                  | -2.746405 | 0.000000  | 3.67                        |
| 10     | C5                | H    | 1.155351                                   | -1.728879 | -0.889147 | 3.67                        |
| 11     | C5                | H    | 1.155351                                   | -1.728879 | 0.889147  | 3.67                        |

**Compound 10: N,N-Dimethylformamide (DMF)**

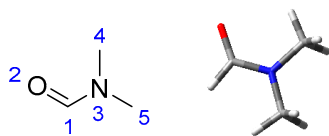

| Atom # | Carbon Attachment | Atom | Calculated Atomic Coordinates |           |           | Experimental $\delta$ (ppm) |
|--------|-------------------|------|-------------------------------|-----------|-----------|-----------------------------|
|        |                   |      | x                             | y         | z         |                             |
| 1      | -                 | C    | 0.697924                      | -0.825549 | 0.000000  | 162.52                      |
| 2      | -                 | O    | 0.209607                      | -1.943285 | 0.000000  | -                           |
| 3      | -                 | N    | 0.000000                      | 0.348854  | 0.000000  | -                           |
| 4      | -                 | C    | 0.665195                      | 1.635661  | 0.000000  | 31.44                       |
| 5      | -                 | C    | -1.452628                     | 0.332528  | 0.000000  | 36.48                       |
| 6      | C1                | H    | 1.792762                      | -0.653290 | 0.000000  | 8.02                        |
| 7      | C4                | H    | 0.394574                      | 2.221023  | 0.889346  | 2.89                        |
| 8      | C4                | H    | 1.749320                      | 1.489175  | 0.000000  | 2.89                        |
| 9      | C4                | H    | 0.394574                      | 2.221023  | -0.889346 | 2.89                        |
| 10     | C5                | H    | -1.846975                     | 0.839609  | -0.890461 | 2.96                        |
| 11     | C5                | H    | -1.777086                     | -0.708689 | 0.000000  | 2.96                        |
| 12     | C5                | H    | -1.846975                     | 0.839609  | 0.890461  | 2.96                        |

**Compound 11: Propionitrile**

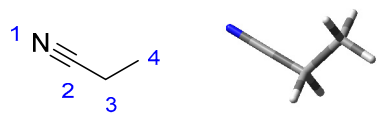

| Atom # | Carbon Attachment | Atom | Calculated Atomic Coordinates |           |           | Experimental $\delta$ (ppm) |
|--------|-------------------|------|-------------------------------|-----------|-----------|-----------------------------|
|        |                   |      | x                             | y         | z         |                             |
| 1      | -                 | N    | -1.370404                     | -1.429413 | 0.000000  | -                           |
| 2      | -                 | C    | -0.773054                     | -0.434092 | 0.000000  | 120.68                      |
| 3      | -                 | C    | 0.000000                      | 0.812731  | 0.000000  | 10.92                       |
| 4      | -                 | C    | -1.519806                     | 0.567322  | 0.000000  | 10.48                       |
| 5      | C3                | H    | -0.293533                     | 1.398433  | 0.879652  | 2.36                        |
| 6      | C3                | H    | -0.293533                     | 1.398433  | -0.879652 | 2.36                        |
| 7      | C2                | H    | 2.048163                      | 1.525644  | 0.000000  | 1.30                        |
| 8      | C2                | H    | 1.825611                      | 0.003809  | 0.886224  | 1.30                        |
| 9      | C2                | H    | 1.825611                      | 0.003809  | -0.886224 | 1.30                        |

**Compound 12: Isoxazole**

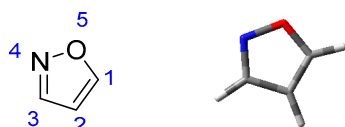

| Atom # | Carbon Attachment | Atom | Calculated Atomic Coordinates |           |          | Experimental $\delta$ (ppm) |
|--------|-------------------|------|-------------------------------|-----------|----------|-----------------------------|
|        |                   |      | x                             | y         | z        |                             |
| 1      | -                 | C    | 0.000000                      | 1.127837  | 0.000000 | 157.64                      |
| 2      | -                 | C    | 1.128139                      | 0.368535  | 0.000000 | 103.47                      |
| 3      | -                 | C    | 0.617674                      | -0.960436 | 0.000000 | 149.02                      |
| 4      | -                 | N    | -0.694334                     | -0.995568 | 0.000000 | -                           |
| 5      | -                 | O    | -1.093882                     | 0.345149  | 0.000000 | -                           |
| 6      | C1                | H    | -0.184497                     | 0.345149  | 0.000000 | 8.48                        |
| 7      | C2                | H    | 2.156947                      | 2.192680  | 0.000000 | 6.38                        |
| 8      | C3                | H    | 1.164069                      | -1.895339 | 0.000000 | 8.31                        |

**Compound 13: Isobutylene (2-Methylpropene)**

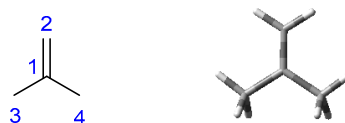

| Atom # | Carbon Attachment | Atom | Calculated Atomic Coordinates |           |           | Experimental $\delta$ (ppm) |
|--------|-------------------|------|-------------------------------|-----------|-----------|-----------------------------|
|        |                   |      | x                             | y         | z         |                             |
| 1      | -                 | C    | 0.000000                      | -0.000000 | 0.122960  | 142.45                      |
| 2      | -                 | C    | 0.000000                      | -0.000000 | 1.459489  | 110.47                      |
| 3      | -                 | C    | 0.000000                      | 1.278083  | -0.678954 | 24.13                       |
| 4      | -                 | C    | -0.000000                     | -1.278083 | -0.678954 | 24.13                       |
| 5      | C2                | H    | 0.000000                      | -0.924634 | 2.031659  | 4.66                        |
| 6      | C2                | H    | 0.000000                      | 0.924634  | 2.031659  | 4.66                        |
| 7      | C3                | H    | 0.000000                      | 2.163190  | -0.035443 | 1.73                        |
| 8      | C3                | H    | 0.880040                      | 1.332255  | -1.334921 | 1.73                        |
| 9      | C3                | H    | -0.880040                     | 1.332255  | -1.334921 | 1.73                        |
| 10     | C4                | H    | -0.000000                     | -2.163190 | -0.035443 | 1.73                        |
| 11     | C4                | H    | -0.880040                     | -1.332255 | -1.334921 | 1.73                        |
| 12     | C4                | H    | 0.880040                      | -1.332255 | -1.334921 | 1.73                        |

**Compound 14: 2-Butyne**

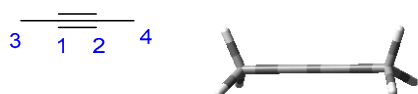

| Atom # | Carbon Attachment | Atom | Calculated Atomic Coordinates |           |           | Experimental $\delta$ (ppm) |
|--------|-------------------|------|-------------------------------|-----------|-----------|-----------------------------|
|        |                   |      | x                             | y         | z         |                             |
| 1      | -                 | C    | 0.000000                      | 0.000000  | 0.604587  | 74.54                       |
| 2      | -                 | C    | 0.000000                      | 0.000000  | -0.604587 | 74.54                       |
| 3      | -                 | C    | 0.000000                      | 0.000000  | 2.066081  | 3.37                        |
| 4      | -                 | C    | 0.000000                      | 0.000000  | -2.066081 | 3.37                        |
| 5      | C3                | H    | 0.000000                      | 1.021502  | 2.466253  | 1.75                        |
| 6      | C3                | H    | -0.884647                     | -0.510751 | 2.466253  | 1.75                        |
| 7      | C3                | H    | 0.884647                      | -0.510751 | 2.466253  | 1.75                        |
| 8      | C4                | H    | 0.000000                      | 1.021502  | -2.466253 | 1.75                        |
| 9      | C4                | H    | 0.884647                      | -0.510751 | -2.466253 | 1.75                        |
| 10     | C4                | H    | -0.884647                     | -0.510751 | -2.466253 | 1.75                        |

**Compound 15: t-Butyl nitrate (2-Methyl-2-nitropropane)**

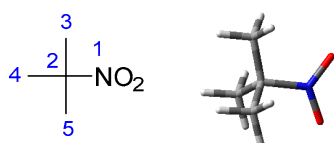

| Atom # | Carbon Attachment | Atom | Calculated Atomic Coordinates |           |           | Experimental $\delta$ (ppm) |
|--------|-------------------|------|-------------------------------|-----------|-----------|-----------------------------|
|        |                   |      | x                             | y         | z         |                             |
| 1      | -                 | N    | -0.146964                     | -0.975496 | 0.000000  | -                           |
| 2      | -                 | C    | 0.063658                      | 0.559662  | 0.000000  | 85.06                       |
| 3      | -                 | C    | -1.299721                     | 1.246854  | 0.000000  | 27.87                       |
| 4      | -                 | C    | 0.866281                      | 0.878877  | 1.268433  | 27.87                       |
| 5      | -                 | C    | 0.866281                      | 0.878877  | -1.268433 | 27.87                       |
| 6      | C3                | H    | -1.143931                     | 2.331156  | 0.000000  | 1.62                        |
| 7      | C3                | H    | -1.883032                     | 0.980536  | -0.884879 | 1.62                        |
| 8      | C3                | H    | -1.883032                     | 0.980536  | 0.884879  | 1.62                        |
| 9      | C4                | H    | 1.069422                      | 1.954161  | 1.303318  | 1.62                        |
| 10     | C4                | H    | 0.303440                      | 0.609249  | 2.168502  | 1.62                        |
| 11     | C4                | H    | 1.816375                      | 0.340115  | 1.273084  | 1.62                        |
| 12     | C5                | H    | 1.069422                      | 1.954161  | -1.303318 | 1.62                        |
| 13     | C5                | H    | 0.303440                      | 0.609249  | -2.168502 | 1.62                        |
| 14     | C5                | H    | 1.816375                      | 0.340115  | -1.273084 | 1.62                        |
| 15     | -                 | O    | -1.293622                     | -1.411438 | 0.000000  | -                           |
| 16     | -                 | O    | 0.866281                      | -1.670614 | 0.000000  | -                           |

**Compound 16: Tetrahydrofuran (THF)**

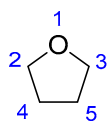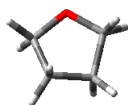

| Atom # | Carbon Attachment | Atom | Calculated Atomic Coordinates |           |           | Experimental $\delta$ (ppm) |
|--------|-------------------|------|-------------------------------|-----------|-----------|-----------------------------|
|        |                   |      | x                             | y         | z         |                             |
| 1      | -                 | O    | 0.000000                      | -0.000000 | 1.251442  | -                           |
| 2      | -                 | C    | 0.000000                      | 1.172681  | 0.430760  | 67.99                       |
| 3      | -                 | C    | -0.000000                     | -1.172681 | 0.430760  | 67.99                       |
| 4      | -                 | C    | -0.307936                     | 0.703722  | -0.996748 | 25.62                       |
| 5      | -                 | C    | 0.307936                      | -0.703722 | -0.996748 | 25.62                       |
| 6      | C2                | H    | -0.742265                     | 1.877577  | 0.823672  | 3.75                        |
| 7      | C3                | H    | 0.742265                      | -1.877577 | 0.823672  | 3.75                        |
| 8      | C3                | H    | 0.987905                      | 1.656495  | 0.483033  | 3.75                        |
| 9      | C2                | H    | -0.987905                     | -1.656495 | 0.483033  | 3.75                        |
| 10     | C4                | H    | -1.391540                     | 0.644345  | -1.155142 | 1.85                        |
| 11     | C5                | H    | 1.391540                      | -0.644345 | -1.155142 | 1.85                        |
| 12     | C4                | H    | 0.110732                      | 1.365421  | -1.761405 | 1.85                        |
| 13     | C5                | H    | -0.110732                     | -1.365421 | -1.761405 | 1.85                        |

**Compound 17: N,N-Dimethylacetamide (DMAc)**

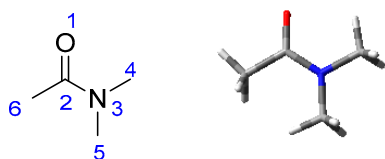

| Atom # | Carbon Attachment | Atom | Calculated Atomic Coordinates |           |           | Experimental $\delta$ (ppm) |
|--------|-------------------|------|-------------------------------|-----------|-----------|-----------------------------|
|        |                   |      | x                             | y         | z         |                             |
| 1      | -                 | O    | 1.067377                      | -1.472559 | 0.000130  | -                           |
| 2      | -                 | C    | 0.728849                      | -0.293308 | -0.000029 | 170.66                      |
| 3      | -                 | N    | -0.596288                     | 0.083564  | -0.000285 | -                           |
| 4      | -                 | C    | -1.623986                     | -0.946085 | -0.000013 | 35.20                       |
| 5      | -                 | C    | -1.083783                     | 1.450223  | 0.000127  | 38.05                       |
| 6      | -                 | C    | 1.778984                      | 0.813138  | -0.000038 | 21.58                       |
| 7      | C4                | H    | -1.133732                     | -1.918451 | -0.000364 | 2.94                        |
| 8      | C4                | H    | -2.261301                     | -0.855378 | 0.890146  | 2.94                        |
| 9      | C4                | H    | -2.262012                     | -0.855052 | -0.889618 | 2.94                        |
| 10     | C5                | H    | -0.261812                     | 2.164327  | -0.000763 | 3.01                        |
| 11     | C5                | H    | -1.704698                     | 1.640728  | -0.886873 | 3.01                        |
| 12     | C5                | H    | -1.703029                     | 1.640949  | 0.888265  | 3.01                        |
| 13     | C6                | H    | 2.754921                      | 0.326973  | 0.000021  | 2.08                        |
| 14     | C6                | H    | 1.703172                      | 1.453769  | -0.886055 | 2.08                        |
| 15     | C6                | H    | 1.703108                      | 1.453846  | 0.885917  | 2.08                        |



**Compound 18: Cyclobutanone**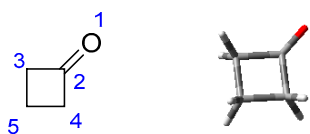

| Atom # | Carbon Attachment | Atom | Calculated Atomic Coordinates |           |           | Experimental $\delta$ (ppm) |
|--------|-------------------|------|-------------------------------|-----------|-----------|-----------------------------|
|        |                   |      | x                             | y         | z         |                             |
| 1      | -                 | O    | -0.000000                     | 0.000000  | 1.883380  | -                           |
| 2      | -                 | C    | -0.000000                     | 0.000000  | 0.680062  | 209.40                      |
| 3      | -                 | C    | -0.000000                     | 1.111393  | -0.385557 | 47.74                       |
| 4      | -                 | C    | -0.000000                     | -1.111393 | -0.385557 | 47.74                       |
| 5      | -                 | C    | 0.000000                      | 0.000000  | -1.480192 | 9.71                        |
| 6      | C3                | H    | -0.887021                     | 1.754218  | -0.350761 | 3.09                        |
| 7      | C3                | H    | 0.887021                      | 1.754218  | -0.350761 | 3.09                        |
| 8      | C4                | H    | -0.887021                     | -1.754218 | -0.350761 | 3.09                        |
| 9      | C4                | H    | 0.887021                      | -1.754218 | -0.350761 | 3.09                        |
| 10     | C5                | H    | -0.887077                     | 0.000000  | -2.118265 | 2.01                        |
| 11     | C5                | H    | 0.887077                      | -0.000000 | -2.118265 | 2.01                        |

**Compound 19: Butyrolactone**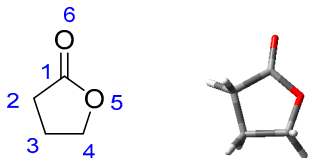

| Atom # | Carbon Attachment | Atom | Calculated Atomic Coordinates |           |           | Experimental $\delta$ (ppm) |
|--------|-------------------|------|-------------------------------|-----------|-----------|-----------------------------|
|        |                   |      | x                             | y         | z         |                             |
| 1      | -                 | C    | 0.889487                      | -0.001520 | 0.003368  | 177.65                      |
| 2      | -                 | C    | -0.026980                     | 1.209424  | 0.169334  | 27.80                       |
| 3      | -                 | C    | -1.406468                     | 0.669083  | -0.219782 | 22.20                       |
| 4      | -                 | C    | -1.269380                     | -0.822646 | 0.127783  | 68.48                       |
| 5      | -                 | O    | 0.127216                      | -1.134993 | -0.043504 | -                           |
| 6      | -                 | O    | 2.089064                      | -0.028869 | -0.072118 | -                           |
| 7      | C2                | H    | 0.012392                      | 1.522563  | 1.220723  | 2.50                        |
| 8      | C2                | H    | 0.334092                      | 2.042919  | -0.436677 | 2.50                        |
| 9      | C3                | H    | -2.237210                     | 1.144067  | 0.308940  | 2.27                        |
| 10     | C3                | H    | -1.574055                     | 0.791455  | -1.295294 | 2.27                        |
| 11     | C4                | H    | -1.545750                     | -1.029880 | 1.169152  | 4.35                        |
| 12     | C4                | H    | -1.839665                     | -1.486270 | -0.526076 | 4.35                        |

**Compound 20: Isobutyronitrile (2-Cyanopropane)**

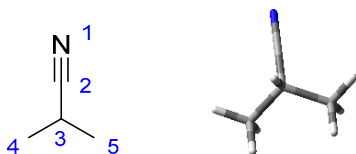

| Atom # | Carbon Attachment | Atom | Calculated Atomic Coordinates |           |           | Experimental $\delta$ (ppm) |
|--------|-------------------|------|-------------------------------|-----------|-----------|-----------------------------|
|        |                   |      | x                             | y         | z         |                             |
| 1      | -                 | N    | -0.405239                     | -2.185681 | 0.000000  | -                           |
| 2      | -                 | C    | -0.026629                     | -1.087975 | 0.000000  | 123.76                      |
| 3      | -                 | C    | 0.438658                      | 0.309211  | -0.000000 | 19.84                       |
| 4      | -                 | C    | -0.026629                     | 1.032249  | 1.279737  | 19.95                       |
| 5      | -                 | C    | -0.026629                     | 1.032249  | -1.279737 | 19.95                       |
| 6      | C3                | H    | 1.536699                      | 0.274152  | 0.000000  | 2.70                        |
| 7      | C4                | H    | 0.325365                      | 0.517215  | 2.178429  | 1.33                        |
| 8      | C4                | H    | 0.367828                      | 2.053774  | 1.288429  | 1.33                        |
| 9      | C4                | H    | -1.119520                     | 1.084616  | 1.320106  | 1.33                        |
| 10     | C5                | H    | 0.325365                      | 0.517215  | -2.178429 | 1.33                        |
| 11     | C5                | H    | 0.367828                      | 2.053774  | -1.288429 | 1.33                        |
| 12     | C5                | H    | -1.119520                     | 1.084616  | -1.320106 | 1.33                        |

**Compound 21: Furan**

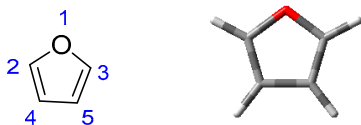

| Atom # | Carbon Attachment | Atom | Calculated Atomic Coordinates |           |           | Experimental $\delta$ (ppm) |
|--------|-------------------|------|-------------------------------|-----------|-----------|-----------------------------|
|        |                   |      | x                             | y         | z         |                             |
| 1      | -                 | O    | -0.000000                     | 0.000000  | 1.161192  | -                           |
| 2      | -                 | C    | -0.000000                     | 1.094672  | 0.347334  | 142.54                      |
| 3      | -                 | C    | -0.000000                     | -1.094672 | 0.347334  | 142.54                      |
| 4      | -                 | C    | 0.000000                      | 0.717590  | -0.960054 | 109.45                      |
| 5      | -                 | C    | -0.000000                     | -0.717590 | -0.960054 | 109.45                      |
| 6      | C2                | H    | -0.000000                     | 2.049543  | 0.850322  | 7.45                        |
| 7      | C3                | H    | -0.000000                     | -2.049543 | 0.850322  | 7.45                        |
| 8      | C4                | H    | 0.000000                      | 1.374522  | -1.818771 | 6.40                        |
| 9      | C5                | H    | -0.000000                     | -1.374522 | -1.818771 | 6.40                        |

**Compound 22: 3-Butyn-2-one**

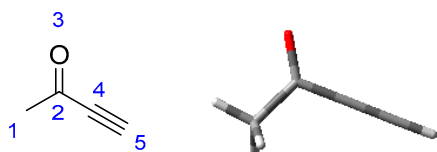

| Atom # | Carbon Attachment | Atom | Calculated Atomic Coordinates |           |           | Experimental $\delta$ (ppm) |
|--------|-------------------|------|-------------------------------|-----------|-----------|-----------------------------|
|        |                   |      | x                             | y         | z         |                             |
| 1      | -                 | C    | 1.287423                      | -1.061063 | 0.000015  | 32.63                       |
| 2      | -                 | C    | 0.452063                      | 0.202176  | -0.000033 | 183.94                      |
| 3      | -                 | O    | 0.933957                      | 1.320930  | 0.000034  | -                           |
| 4      | -                 | C    | -0.994215                     | 0.005826  | -0.000121 | 81.84                       |
| 5      | -                 | C    | -2.191020                     | -0.168654 | 0.000038  | 78.10                       |
| 6      | C1                | H    | 1.052982                      | -1.669866 | -0.881556 | 2.38                        |
| 7      | C1                | H    | 1.053211                      | -1.669598 | 0.881837  | 2.38                        |
| 8      | C1                | H    | 2.346708                      | -0.795971 | -0.000143 | 2.38                        |
| 9      | C5                | H    | -3.250066                     | -0.301720 | 0.000205  | 3.21                        |

**Compound 23: Pyrimidine**

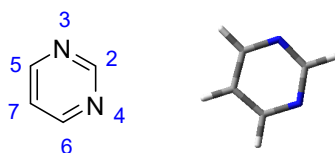

| Atom # | Carbon Attachment | Atom | Calculated Atomic Coordinates |           |           | Experimental $\delta$ (ppm) |
|--------|-------------------|------|-------------------------------|-----------|-----------|-----------------------------|
|        |                   |      | x                             | y         | z         |                             |
| 1      | C2                | H    | -0.000000                     | -0.000000 | -2.397628 | 9.21                        |
| 2      | -                 | C    | -0.000000                     | -0.000000 | -0.309221 | 159.10                      |
| 3      | -                 | N    | 0.000000                      | 1.199170  | -0.716460 | -                           |
| 4      | -                 | N    | -0.000000                     | -1.199170 | -0.716460 | -                           |
| 5      | -                 | C    | 0.000000                      | 1.184371  | 0.622298  | 156.94                      |
| 6      | -                 | C    | -0.000000                     | -1.184371 | 0.622298  | 156.94                      |
| 7      | -                 | C    | 0.000000                      | 0.000000  | 1.356463  | 121.58                      |
| 8      | C5                | H    | 0.000000                      | 2.154249  | 1.117670  | 8.76                        |
| 9      | C6                | H    | -0.000000                     | -2.154249 | 1.117670  | 8.76                        |
| 10     | C7                | H    | 0.000000                      | 0.000000  | 2.441707  | 7.34                        |

**Compound 24: 1,4-Pyrazine**

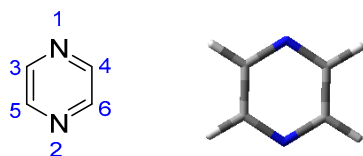

| Atom # | Carbon Attachment | Atom | Calculated Atomic Coordinates |           |           | Experimental $\delta$ (ppm) |
|--------|-------------------|------|-------------------------------|-----------|-----------|-----------------------------|
|        |                   |      | x                             | y         | z         |                             |
| 1      | -                 | N    | 0.000000                      | 0.000000  | 1.409502  | -                           |
| 2      | -                 | N    | 0.000000                      | 0.000000  | -1.409502 | -                           |
| 3      | -                 | C    | 0.000000                      | 1.133170  | 0.698425  | 145.18                      |
| 4      | -                 | C    | -0.000000                     | -1.133170 | 0.698425  | 145.18                      |
| 5      | -                 | C    | 0.000000                      | 1.133170  | -0.698425 | 145.18                      |
| 6      | -                 | C    | -0.000000                     | -1.133170 | -0.698425 | 145.18                      |
| 7      | C3                | H    | 0.000000                      | 2.067277  | 1.257022  | 8.60                        |
| 8      | C4                | H    | -0.000000                     | -2.067277 | 1.257022  | 8.60                        |
| 9      | C5                | H    | 0.000000                      | 2.067277  | -1.257022 | 8.60                        |
| 10     | C6                | H    | -0.000000                     | -2.067277 | -1.257022 | 8.60                        |

**Compound 25: 1,2-Pyrazine (pyridazine)**

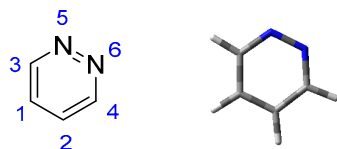

| Atom # | Carbon Attachment | Atom | Calculated Atomic Coordinates |           |           | Experimental $\delta$ (ppm) |
|--------|-------------------|------|-------------------------------|-----------|-----------|-----------------------------|
|        |                   |      | x                             | y         | z         |                             |
| 1      | -                 | C    | 0.000000                      | 0.691979  | 1.180878  | 126.36                      |
| 2      | -                 | C    | -0.000000                     | -0.691979 | 1.180878  | 126.36                      |
| 3      | -                 | C    | 0.000000                      | 1.322940  | -0.067711 | 151.72                      |
| 4      | -                 | C    | -0.000000                     | -1.322940 | -0.067711 | 151.72                      |
| 5      | -                 | N    | 0.000000                      | 0.668403  | -1.232308 | -                           |
| 6      | -                 | N    | -0.000000                     | -0.668403 | -1.232308 | -                           |
| 7      | C1                | H    | 0.000000                      | 1.272126  | 2.099037  | 7.49                        |
| 8      | C2                | H    | -0.000000                     | -1.272126 | 2.099037  | 7.49                        |
| 9      | C3                | H    | 0.000000                      | 2.407140  | -0.151885 | 9.23                        |
| 10     | C4                | H    | -0.000000                     | -2.407140 | -0.151885 | 9.23                        |

**Compound 26: Cyclopentane**

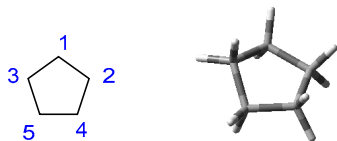

| Atom # | Carbon Attachment | Atom | Calculated Atomic Coordinates |           |           | Experimental $\delta$ (ppm) |
|--------|-------------------|------|-------------------------------|-----------|-----------|-----------------------------|
|        |                   |      | x                             | y         | z         |                             |
| 1      | -                 | C    | -0.000000                     | 0.000000  | 1.308322  | 25.84                       |
| 2      | -                 | C    | -0.000000                     | 1.243115  | 0.371790  | 25.84                       |
| 3      | -                 | C    | -0.000000                     | -1.243115 | 0.371790  | 25.84                       |
| 4      | -                 | C    | -0.328308                     | 0.694836  | -1.031133 | 25.84                       |
| 5      | -                 | C    | 0.328308                      | -0.694836 | -1.031133 | 25.84                       |
| 6      | C1                | H    | 0.877601                      | 0.006551  | 1.963936  | 1.50                        |
| 7      | C1                | H    | -0.877601                     | -0.006551 | 1.963936  | 1.50                        |
| 8      | C2                | H    | -0.702811                     | 2.017236  | 0.698224  | 1.50                        |
| 9      | C2                | H    | 0.995910                      | 1.703363  | 0.359696  | 1.50                        |
| 10     | C3                | H    | 0.702811                      | -2.017236 | 0.698224  | 1.50                        |
| 11     | C3                | H    | -0.995910                     | -1.703363 | 0.359696  | 1.50                        |
| 12     | C4                | H    | -1.415293                     | 0.589197  | -1.152471 | 1.50                        |
| 13     | C4                | H    | 0.027837                      | 1.344896  | -1.838294 | 1.50                        |
| 14     | C5                | H    | 1.415293                      | -0.589197 | -1.152471 | 1.50                        |
| 15     | C5                | H    | -0.027837                     | 1.344896  | -1.838294 | 1.50                        |

**Compound 27: 2-Methyl-2-butene**

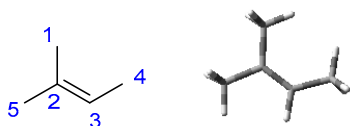

| Atom # | Carbon Attachment | Atom | Calculated Atomic Coordinates |           |           | Experimental $\delta$ (ppm) |
|--------|-------------------|------|-------------------------------|-----------|-----------|-----------------------------|
|        |                   |      | x                             | y         | z         |                             |
| 1      | -                 | C    | -1.508735                     | 0.496709  | 0.000000  | 17.32                       |
| 2      | -                 | C    | 0.000000                      | 0.450978  | 0.000000  | 132.10                      |
| 3      | -                 | C    | 0.735359                      | -0.671272 | 0.000000  | 118.44                      |
| 4      | -                 | C    | 0.267551                      | -2.099880 | 0.000000  | 13.41                       |
| 5      | -                 | C    | 0.663899                      | 1.808386  | 0.000000  | 25.63                       |
| 6      | C1                | H    | -1.972994                     | -0.492122 | 0.000000  | 1.60                        |
| 7      | C1                | H    | -1.880102                     | 1.041295  | 0.879589  | 1.60                        |
| 8      | C1                | H    | -1.880102                     | 1.041295  | -0.879589 | 1.60                        |
| 9      | C3                | H    | 1.820291                      | -0.552712 | 0.000000  | 5.19                        |
| 10     | C4                | H    | -0.821428                     | -2.196887 | 0.000000  | 1.56                        |
| 11     | C4                | H    | 0.649157                      | -2.636213 | -0.879870 | 1.56                        |
| 12     | C4                | H    | 0.649157                      | -2.636213 | 0.879870  | 1.56                        |
| 13     | C5                | H    | 1.755677                      | 1.729246  | 0.000000  | 1.68                        |
| 14     | C5                | H    | 0.365948                      | 2.396391  | -0.879917 | 1.68                        |
| 15     | C5                | H    | 0.365948                      | 2.396391  | 0.879917  | 1.68                        |

**Compound 28: Methyl t-butyl ether (MTBE)**

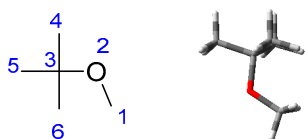

| Atom # | Carbon Attachment | Atom | Calculated Atomic Coordinates |           |           | Experimental $\delta$ (ppm) |
|--------|-------------------|------|-------------------------------|-----------|-----------|-----------------------------|
|        |                   |      | x                             | y         | z         |                             |
| 1      | -                 | C    | 0.635656                      | -1.945029 | 0.000000  | 49.47                       |
| 2      | -                 | O    | -0.443936                     | -1.034131 | 0.000000  | -                           |
| 3      | -                 | C    | -0.139565                     | 0.374999  | -0.000000 | 72.79                       |
| 4      | -                 | C    | -1.524158                     | 1.033189  | -0.000000 | 26.99                       |
| 5      | -                 | C    | 0.635656                      | 0.773487  | 1.266946  | 26.99                       |
| 6      | -                 | C    | 0.635656                      | 0.773487  | -1.266946 | 26.99                       |
| 7      | C1                | H    | 0.189192                      | -2.943662 | 0.000000  | 3.21                        |
| 8      | C1                | H    | 1.272407                      | -1.853184 | -0.892175 | 3.21                        |
| 9      | C1                | H    | 1.272407                      | -1.853184 | 0.892175  | 3.21                        |
| 10     | C4                | H    | -1.438804                     | 2.125188  | -0.000000 | 1.19                        |
| 11     | C4                | H    | -2.088966                     | 0.725958  | -0.886242 | 1.19                        |
| 12     | C4                | H    | -2.088966                     | 0.725958  | 0.886242  | 1.19                        |
| 13     | C5                | H    | 0.737202                      | 1.862898  | 1.324953  | 1.19                        |
| 14     | C5                | H    | 0.104275                      | 0.429520  | 2.160987  | 1.19                        |
| 15     | C5                | H    | 1.645898                      | 0.350169  | 1.281904  | 1.19                        |
| 16     | C6                | H    | 0.737202                      | 1.862898  | -1.324953 | 1.19                        |
| 17     | C6                | H    | 0.104275                      | 0.429520  | -2.160987 | 1.19                        |
| 18     | C6                | H    | 1.645898                      | 0.350169  | -1.281904 | 1.19                        |

**Compound 29: Tetrahydropyran (THP)**

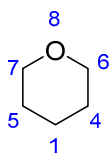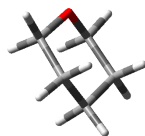

| Atom # | Carbon Attachment | Atom | Calculated Atomic Coordinates <sup>a</sup> |           |           | Experimental $\delta$ (ppm) |
|--------|-------------------|------|--------------------------------------------|-----------|-----------|-----------------------------|
|        |                   |      | x                                          | y         | z         |                             |
| 1      | -                 | C    | -0.626248                                  | 1.328824  | 0.000000  | 23.46                       |
| 2      | C1                | H    | -1.701325                                  | 1.095140  | 0.000000  | 1.64                        |
| 3      | C1                | H    | -0.541876                                  | 2.422329  | 0.000000  | 1.64                        |
| 4      | -                 | C    | 0.020517                                   | 0.731339  | 1.259702  | 26.60                       |
| 5      | -                 | C    | 0.020517                                   | 0.731339  | -1.259702 | 26.60                       |
| 6      | -                 | C    | 0.020517                                   | -0.797942 | 1.179649  | 68.71                       |
| 7      | -                 | C    | 0.020517                                   | -0.797942 | -1.179649 | 68.71                       |
| 8      | -                 | O    | 0.663440                                   | -1.265666 | -0.000000 | -                           |
| 9      | C4                | H    | 1.058694                                   | 1.078846  | 1.344361  | 1.57                        |
| 10     | C4                | H    | -0.507657                                  | 1.055870  | 2.165785  | 1.57                        |
| 11     | C5                | H    | 1.058694                                   | 1.078846  | -1.344361 | 1.57                        |
| 12     | C5                | H    | -0.507657                                  | 1.055870  | -2.165785 | 1.57                        |
| 13     | C6                | H    | 0.567381                                   | -1.242901 | 2.016957  | 3.65                        |
| 14     | C6                | H    | -1.018037                                  | -1.174735 | 1.213826  | 3.65                        |
| 15     | C7                | H    | 0.567381                                   | -1.242901 | -2.016957 | 3.65                        |
| 16     | C7                | H    | -1.018037                                  | -1.174735 | -1.213826 | 3.65                        |

<sup>a</sup>: Atomic coordinates for chair conformation.

The chair conformation of THP was found to comprise 99.98% of the Boltzmann population. Thus, the boat and twisted boat conformations can be neglected.



**Compound 30: N-Methylpyrrolidine**

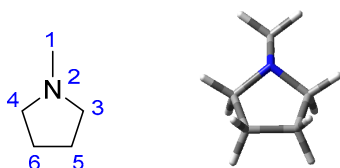

| Atom # | Carbon Attachment | Atom | Calculated Atomic Coordinates <sup>a</sup> |           |           | Experimental $\delta$ (ppm) |
|--------|-------------------|------|--------------------------------------------|-----------|-----------|-----------------------------|
|        |                   |      | x                                          | y         | z         |                             |
| 1      | -                 | C    | 0.337276                                   | 2.099453  | -0.000000 | 42.14                       |
| 2      | -                 | N    | 0.446990                                   | 0.654778  | -0.000000 | -                           |
| 3      | -                 | C    | -0.163353                                  | 0.003840  | -1.157016 | 56.27                       |
| 4      | -                 | C    | -0.163353                                  | 0.003840  | 0.778520  | 56.27                       |
| 5      | -                 | C    | -0.163353                                  | -1.489826 | -0.778520 | 24.06                       |
| 6      | -                 | C    | -0.163353                                  | -1.489826 | -0.000000 | 24.06                       |
| 7      | C1                | H    | -0.713743                                  | 2.454949  | -0.886306 | 2.38                        |
| 8      | C1                | H    | 0.833530                                   | 2.510891  | 0.886306  | 2.38                        |
| 9      | C1                | H    | 0.833530                                   | 2.510891  | 0.886306  | 2.38                        |
| 10     | C3                | H    | 0.405145                                   | 0.224036  | 2.068209  | 2.50                        |
| 11     | C3                | H    | -1.202898                                  | 0.357961  | 1.320962  | 2.50                        |
| 12     | C4                | H    | 0.405145                                   | 0.224036  | -2.068209 | 2.50                        |
| 13     | C4                | H    | -1.202898                                  | 0.357961  | -1.320962 | 2.50                        |
| 14     | C5                | H    | 0.734195                                   | -1.983997 | 1.162545  | 1.81                        |
| 15     | C5                | H    | -1.029164                                  | -2.010529 | 1.199099  | 1.81                        |
| 16     | C6                | H    | 0.734195                                   | -1.983997 | -1.162545 | 1.81                        |
| 17     | C6                | H    | -1.029164                                  | -2.010529 | -1.199099 | 1.81                        |

<sup>a</sup>: Atomic coordinates for equatorial methyl conformation.

N-Methylpyrrolidine exhibits two conformations with the methyl group either equatorial or axial. The equatorial configuration comprises 98.96% of the Boltzmann population, allowing for the axial configuration to effectively be ignored in chemical shift calculations.

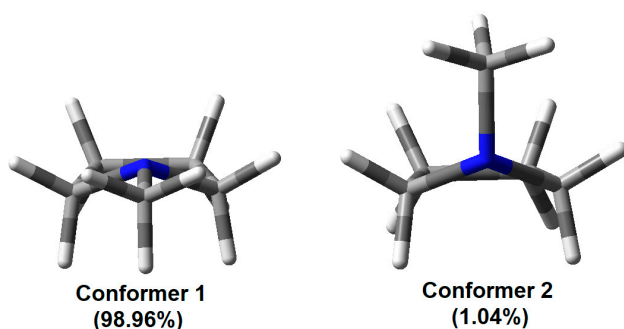

**Compound 31: Cyclopentanone**

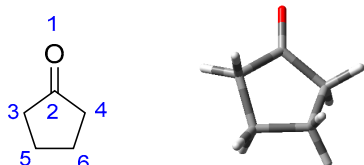

| Atom # | Carbon Attachment | Atom | Calculated Atomic Coordinates |           |           | Experimental $\delta$ (ppm) |
|--------|-------------------|------|-------------------------------|-----------|-----------|-----------------------------|
|        |                   |      | x                             | y         | z         |                             |
| 1      | -                 | O    | -0.000000                     | -0.000000 | 2.138951  | -                           |
| 2      | -                 | C    | -0.000000                     | -0.000000 | 0.927928  | 220.72                      |
| 3      | -                 | C    | -0.000000                     | 1.244707  | 0.029822  | 38.37                       |
| 4      | -                 | C    | -0.000000                     | -1.244707 | 0.029822  | 38.37                       |
| 5      | -                 | C    | 0.298048                      | 0.713931  | -1.382020 | 23.25                       |
| 6      | -                 | C    | -0.298048                     | -0.713931 | -1.382020 | 23.25                       |
| 7      | C3                | H    | -1.005695                     | 1.686525  | 0.083726  | 2.17                        |
| 8      | C3                | H    | 0.699264                      | 1.997654  | 0.405732  | 2.17                        |
| 9      | C4                | H    | 1.005695                      | -1.686525 | 0.083726  | 2.17                        |
| 10     | C4                | H    | -0.699264                     | -1.997654 | 0.405732  | 2.17                        |
| 11     | C5                | H    | -0.115120                     | 1.343317  | -2.176147 | 1.96                        |
| 12     | C5                | H    | 1.383118                      | 0.661440  | -1.539712 | 1.96                        |
| 13     | C6                | H    | 0.115120                      | -1.343317 | -2.176147 | 1.96                        |
| 14     | C6                | H    | -1.383118                     | -0.661440 | -1.539712 | 1.96                        |

**Compound 32: Pivalonitrile**

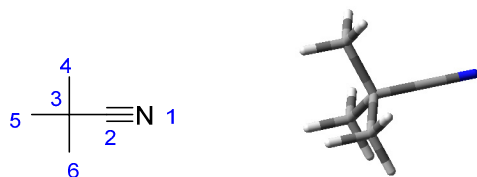

| Atom # | Carbon Attachment | Atom | Calculated Atomic Coordinates |           |           | Experimental $\delta$ (ppm) |
|--------|-------------------|------|-------------------------------|-----------|-----------|-----------------------------|
|        |                   |      | x                             | y         | z         |                             |
| 1      | -                 | N    | 0.000000                      | 0.000000  | 2.360404  | -                           |
| 2      | -                 | C    | 0.000000                      | 0.000000  | 1.199078  | 125.94                      |
| 3      | -                 | C    | 0.000000                      | 0.000000  | -0.279922 | 28.09                       |
| 4      | -                 | C    | 0.000000                      | 1.464540  | -0.772873 | 28.43                       |
| 5      | -                 | C    | 1.268329                      | -0.732270 | -0.772873 | 28.43                       |
| 6      | -                 | C    | -1.268329                     | -0.732270 | -0.772873 | 28.43                       |
| 7      | C4                | H    | 0.000000                      | 1.481013  | -1.868679 | 1.37                        |
| 8      | C4                | H    | -0.887101                     | 2.000032  | -0.420003 | 1.37                        |
| 9      | C4                | H    | 0.887101                      | 2.000032  | -0.420003 | 1.37                        |
| 10     | C5                | H    | 1.282595                      | -0.740506 | -1.868679 | 1.37                        |
| 11     | C5                | H    | 2.175629                      | -0.231764 | -0.420003 | 1.37                        |
| 12     | C5                | H    | 1.288528                      | -1.768268 | -0.420003 | 1.37                        |
| 13     | C6                | H    | -1.282595                     | -0.740506 | -1.868679 | 1.37                        |
| 14     | C6                | H    | -1.288528                     | -1.768268 | -0.420003 | 1.37                        |
| 15     | C6                | H    | -2.175629                     | -0.231764 | -0.420003 | 1.37                        |

**Compound 33: Cyclopent-2-en-1-one**

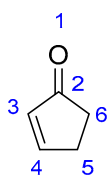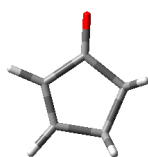

| Atom # | Carbon Attachment | Atom | Calculated Atomic Coordinates |           |           | Experimental $\delta$ (ppm) |
|--------|-------------------|------|-------------------------------|-----------|-----------|-----------------------------|
|        |                   |      | x                             | y         | z         |                             |
| 1      | -                 | O    | 0.062874                      | 2.101042  | 0.000000  | -                           |
| 2      | -                 | C    | -0.000000                     | 0.886527  | 0.000000  | 210.57                      |
| 3      | -                 | C    | -1.226581                     | 0.053604  | 0.000000  | 134.63                      |
| 4      | -                 | C    | -0.904837                     | -1.248423 | 0.000000  | 164.76                      |
| 5      | -                 | C    | 0.586361                      | -1.494497 | 0.000000  | 28.97                       |
| 6      | -                 | C    | 1.199661                      | -0.079145 | 0.000000  | 34.01                       |
| 7      | C3                | H    | -2.222203                     | 0.482809  | 0.000000  | 6.22                        |
| 8      | C4                | H    | -1.619092                     | -2.067869 | 0.000000  | 7.73                        |
| 9      | C5                | H    | 0.883541                      | -2.084946 | 0.876941  | 2.70                        |
| 10     | C5                | H    | 0.883541                      | -2.084946 | -0.876941 | 2.70                        |
| 11     | C6                | H    | 1.821800                      | 0.119109  | 0.879224  | 2.37                        |
| 12     | C6                | H    | 1.821800                      | 0.119109  | -0.879224 | 2.37                        |

**Compound 34: N-Methylpyrrole**

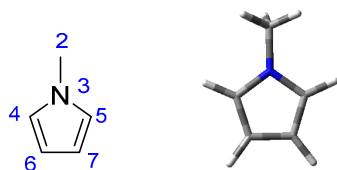

| Atom # | Carbon Attachment | Atom | Calculated Atomic Coordinates |           |           | Experimental $\delta$ (ppm) |
|--------|-------------------|------|-------------------------------|-----------|-----------|-----------------------------|
|        |                   |      | x                             | y         | z         |                             |
| 1      | C2                | H    | 1.122656                      | 2.408002  | 0.000000  | 3.67                        |
| 2      | -                 | C    | 0.077753                      | 2.072793  | 0.000000  | 36.08                       |
| 3      | -                 | N    | -0.025623                     | 0.626404  | 0.000000  | -                           |
| 4      | -                 | C    | -0.019442                     | -0.174768 | 1.119668  | 121.66                      |
| 5      | -                 | C    | -0.019442                     | -0.174768 | -1.119668 | 121.66                      |
| 6      | -                 | C    | -0.019442                     | -1.491662 | 0.711854  | 108.18                      |
| 7      | -                 | C    | -0.019442                     | -1.491662 | -0.711854 | 108.18                      |
| 8      | C2                | H    | -0.419796                     | 2.475976  | -0.886418 | 3.67                        |
| 9      | C2                | H    | -0.419796                     | 2.475976  | 0.886418  | 3.67                        |
| 10     | C4                | H    | -0.018103                     | 0.263657  | 2.108051  | 6.61                        |
| 11     | C5                | H    | -0.018103                     | 0.263657  | -2.108051 | 6.61                        |
| 12     | C6                | H    | -0.033705                     | -2.355849 | 1.362526  | 6.14                        |
| 13     | C7                | H    | -0.033705                     | -2.355849 | -1.362526 | 6.14                        |

**Compound 35: Pyridine**

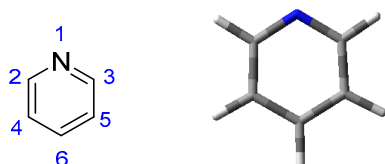

| Atom # | Carbon Attachment | Atom | Calculated Atomic Coordinates |           |           | Experimental $\delta$ (ppm) |
|--------|-------------------|------|-------------------------------|-----------|-----------|-----------------------------|
|        |                   |      | x                             | y         | z         |                             |
| 1      | -                 | N    | 0.000000                      | 0.000000  | 1.420887  | -                           |
| 2      | -                 | C    | 0.000000                      | 1.142176  | 0.721977  | 149.74                      |
| 3      | -                 | C    | -0.000000                     | -1.142176 | 0.721977  | 149.74                      |
| 4      | -                 | C    | -0.000000                     | 1.198645  | -0.673027 | 123.78                      |
| 5      | -                 | C    | -0.000000                     | -1.198645 | -0.673027 | 123.78                      |
| 6      | -                 | C    | -0.000000                     | 0.000000  | -1.385530 | 136.09                      |
| 7      | C2                | H    | 0.000000                      | 2.059822  | 1.308640  | 8.62                        |
| 8      | C3                | H    | -0.000000                     | -2.059822 | 1.308640  | 8.62                        |
| 9      | C4                | H    | -0.000000                     | 2.157868  | -1.182641 | 7.30                        |
| 10     | C5                | H    | -0.000000                     | -2.157868 | -1.182641 | 7.30                        |
| 11     | C6                | H    | -0.000000                     | 0.000000  | -2.472431 | 7.69                        |

**Compound 36: t-Butylethylene (3,3-Dimethyl-1-butene)**

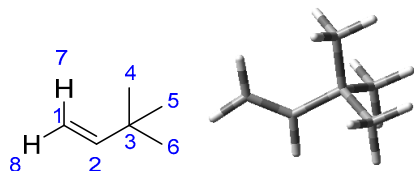

| Atom # | Carbon Attachment | Atom | Calculated Atomic Coordinates |           |           | Experimental $\delta$ (ppm) |
|--------|-------------------|------|-------------------------------|-----------|-----------|-----------------------------|
|        |                   |      | x                             | y         | z         |                             |
| 1      | -                 | C    | -0.126415                     | -2.206499 | 0.000000  | 108.86                      |
| 2      | -                 | C    | 0.568530                      | -1.068294 | 0.000000  | 149.88                      |
| 3      | -                 | C    | 0.032129                      | 0.351659  | 0.000000  | 33.66                       |
| 4      | -                 | C    | -1.504297                     | 0.399969  | 0.000000  | 29.16                       |
| 5      | -                 | C    | 0.568530                      | 1.072457  | 1.258635  | 29.16                       |
| 6      | -                 | C    | 0.568530                      | 1.072457  | -1.258635 | 29.16                       |
| 7      | C1                | H    | -1.212586                     | -2.231006 | 0.000000  | 4.91                        |
| 8      | C1                | H    | 0.374902                      | -3.170922 | 0.000000  | 4.83                        |
| 9      | C2                | H    | 1.659520                      | -1.129168 | 0.000000  | 5.86                        |
| 10     | C4                | H    | -1.851348                     | 1.439804  | 0.000000  | 1.01                        |
| 11     | C4                | H    | -1.920343                     | -0.091428 | -0.886937 | 1.01                        |
| 12     | C4                | H    | -1.920343                     | -0.091428 | 0.886937  | 1.01                        |
| 13     | C5                | H    | 0.250199                      | 2.122321  | 1.268782  | 1.01                        |
| 14     | C5                | H    | 0.199058                      | 0.594541  | 2.172973  | 1.01                        |
| 15     | C5                | H    | 1.664817                      | 1.054964  | 1.289888  | 1.01                        |
| 16     | C6                | H    | 0.250199                      | 2.122321  | -1.268782 | 1.01                        |
| 17     | C6                | H    | 0.199058                      | 0.594541  | -2.172973 | 1.01                        |
| 18     | C6                | H    | 1.664817                      | 1.054964  | -1.289888 | 1.01                        |

**Compound 37: Cyclohexane**

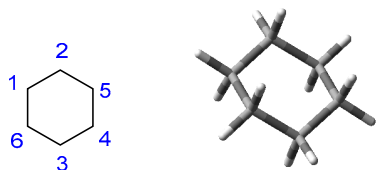

| Atom # | Carbon Attachment | Atom | Calculated Atomic Coordinates <sup>a</sup> |           |           | Experimental $\delta$ (ppm) |
|--------|-------------------|------|--------------------------------------------|-----------|-----------|-----------------------------|
|        |                   |      | x                                          | y         | z         |                             |
| 1      | -                 | C    | -1.270575                                  | 0.733567  | 0.229404  | 26.93                       |
| 2      | -                 | C    | -0.000000                                  | 1.467134  | -0.229404 | 26.93                       |
| 3      | -                 | C    | -0.000000                                  | -1.467134 | 0.229404  | 26.93                       |
| 4      | -                 | C    | 1.270575                                   | -0.733567 | -0.229404 | 26.93                       |
| 5      | -                 | C    | 1.270575                                   | 0.733567  | 0.229404  | 26.93                       |
| 6      | -                 | C    | -1.270575                                  | -0.733567 | -0.229404 | 26.93                       |
| 7      | C1                | H    | -1.329754                                  | 0.767734  | 1.327713  | 1.43                        |
| 8      | C2                | H    | -0.000000                                  | 1.535468  | -1.327713 | 1.43                        |
| 9      | C3                | H    | -0.000000                                  | -1.535468 | 1.327713  | 1.43                        |
| 10     | C4                | H    | 1.329754                                   | -0.767734 | -1.327713 | 1.43                        |
| 11     | C5                | H    | 1.329754                                   | 0.767734  | 1.327713  | 1.43                        |
| 12     | C6                | H    | -1.329754                                  | -0.767734 | -1.327713 | 1.43                        |
| 13     | C1                | H    | -2.163615                                  | 1.249164  | -0.146953 | 1.43                        |
| 14     | C2                | H    | -0.000000                                  | 2.498328  | 0.146953  | 1.43                        |
| 15     | C3                | H    | -0.000000                                  | -2.498328 | -0.146953 | 1.43                        |
| 16     | C4                | H    | 2.163615                                   | -1.249164 | 0.146953  | 1.43                        |
| 17     | C5                | H    | 2.163615                                   | 1.249164  | -0.146953 | 1.43                        |
| 18     | C6                | H    | -2.163615                                  | -1.249164 | 0.146953  | 1.43                        |

<sup>a</sup>: Atomic coordinates for chair form of cyclohexane (> 99.9% of Boltzmann distribution).

**Compound 38: t-Butylacetylene**

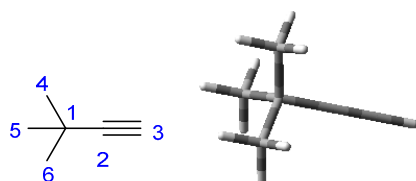

| Atom<br># | Carbon<br>Attachment | Atom | Calculated Atomic Coordinates |           |           | Experimental<br>$\delta$ (ppm) |
|-----------|----------------------|------|-------------------------------|-----------|-----------|--------------------------------|
|           |                      |      | x                             | y         | z         |                                |
| 1         | -                    | C    | 0.299144                      | 0.000020  | 0.000000  | 27.23                          |
| 2         | -                    | C    | -1.174913                     | 0.000162  | 0.000000  | 93.21                          |
| 3         | -                    | C    | -2.383181                     | 0.000246  | 0.000000  | 66.36                          |
| 4         | -                    | C    | 0.808400                      | 1.460302  | 0.000000  | 30.88                          |
| 5         | -                    | C    | 0.808400                      | -0.730286 | 1.264506  | 30.88                          |
| 6         | -                    | C    | 0.808400                      | -0.730286 | -1.264506 | 30.88                          |
| 7         | C3                   | H    | -3.449350                     | 0.000284  | 0.000000  | 2.07                           |
| 8         | C4                   | H    | 1.904911                      | 1.475745  | 0.000000  | 1.25                           |
| 9         | C4                   | H    | 0.456098                      | 1.998231  | -0.886296 | 1.25                           |
| 10        | C4                   | H    | 0.456098                      | 1.998231  | 0.886296  | 1.25                           |
| 11        | C5                   | H    | 1.904875                      | -0.739966 | 1.276783  | 1.25                           |
| 12        | C5                   | H    | 0.457933                      | -0.230491 | 2.173519  | 1.25                           |
| 13        | C5                   | H    | 0.457933                      | -1.766265 | 1.287910  | 1.25                           |
| 14        | C6                   | H    | 1.904875                      | -0.739966 | -1.276783 | 1.25                           |
| 15        | C6                   | H    | 0.454561                      | -1.766265 | -1.287910 | 1.25                           |
| 16        | C6                   | H    | 0.457933                      | -0.230491 | -2.173519 | 1.25                           |



Compound 39: **Benzene**

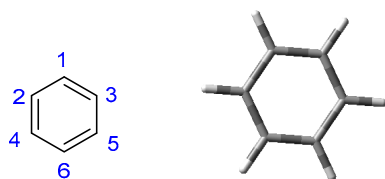

| Atom # | Carbon Attachment | Atom | Calculated Atomic Coordinates |           |          | Experimental $\delta$ (ppm) |
|--------|-------------------|------|-------------------------------|-----------|----------|-----------------------------|
|        |                   |      | x                             | y         | z        |                             |
| 1      | -                 | C    | 0.000000                      | 1.396612  | 0.000000 | 128.34                      |
| 2      | -                 | C    | 1.209501                      | 0.698306  | 0.000000 | 128.34                      |
| 3      | -                 | C    | -1.209501                     | 0.698306  | 0.000000 | 128.34                      |
| 4      | -                 | C    | 1.209501                      | -0.698306 | 0.000000 | 128.34                      |
| 5      | -                 | C    | -1.209501                     | -0.698306 | 0.000000 | 128.34                      |
| 6      | -                 | C    | -0.000000                     | -1.396612 | 0.000000 | 128.34                      |
| 7      | C1                | H    | 0.000000                      | 2.483624  | 0.000000 | 7.36                        |
| 8      | C2                | H    | 2.150881                      | 1.241812  | 0.000000 | 7.36                        |
| 9      | C3                | H    | -2.150881                     | 1.241812  | 0.000000 | 7.36                        |
| 10     | C4                | H    | 2.150881                      | -1.241812 | 0.000000 | 7.36                        |
| 11     | C5                | H    | -2.150881                     | -1.241812 | 0.000000 | 7.36                        |
| 12     | C6                | H    | -0.000000                     | -2.483624 | 0.000000 | 7.36                        |

**Compound 40: N-Methylpiperidine**

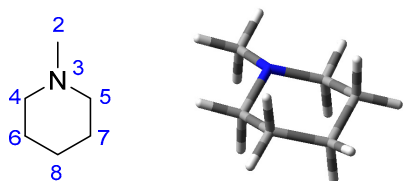

| Atom # | Carbon Attachment | Atom | Calculated Atomic Coordinates <sup>a</sup> |           |           | Experimental $\delta$ (ppm) |
|--------|-------------------|------|--------------------------------------------|-----------|-----------|-----------------------------|
|        |                   |      | x                                          | y         | z         |                             |
| 1      | C2                | H    | 0.306115                                   | 2.814503  | 0.000000  | 2.25                        |
| 2      | -                 | C    | -0.674985                                  | 2.297496  | 0.000000  | 46.87                       |
| 3      | -                 | N    | -0.562141                                  | 0.848381  | 0.000000  | -                           |
| 4      | -                 | C    | 0.097724                                   | 0.358034  | 1.209700  | 56.53                       |
| 5      | -                 | C    | 0.097724                                   | 0.358034  | -1.209700 | 56.53                       |
| 6      | -                 | C    | 0.097724                                   | -1.173280 | 1.258284  | 25.96                       |
| 7      | -                 | C    | 0.097724                                   | -1.173280 | -1.258284 | 25.96                       |
| 8      | -                 | C    | 0.751697                                   | -1.759410 | -0.000000 | 23.73                       |
| 9      | C2                | H    | -1.228316                                  | 2.626094  | -0.887079 | 2.25                        |
| 10     | C2                | H    | -1.228316                                  | 2.626094  | 0.887079  | 2.25                        |
| 11     | C4                | H    | 1.144244                                   | 0.727945  | 1.275961  | 2.35                        |
| 12     | C4                | H    | -0.436303                                  | 0.763048  | 2.078205  | 2.35                        |
| 13     | C5                | H    | 1.144244                                   | 0.727945  | -1.275961 | 2.35                        |
| 14     | C5                | H    | -0.436303                                  | 0.763048  | -2.078205 | 2.35                        |
| 15     | C6                | H    | 0.620496                                   | -1.510648 | 2.162182  | 1.60                        |
| 16     | C6                | H    | -0.940512                                  | -1.522536 | 1.331180  | 1.60                        |
| 17     | C7                | H    | 0.620496                                   | -1.510648 | -2.162182 | 1.60                        |
| 18     | C7                | H    | -0.940512                                  | -1.522536 | -1.331180 | 1.60                        |
| 19     | C8                | H    | 1.823705                                   | -1.512325 | -0.000000 | 1.42                        |
| 20     | C8                | H    | 0.680300                                   | -2.854217 | -0.000000 | 1.42                        |

<sup>a</sup>: Atomic coordinates are for conformer 1, which represents > 99% of the Boltzmann population.

N-Methylpiperidine exhibits two conformations with the methyl group either equatorial or axial. The equatorial configuration comprises 99.60% of the Boltzmann population, allowing for the axial configuration to be ignored in chemical shift calculations.

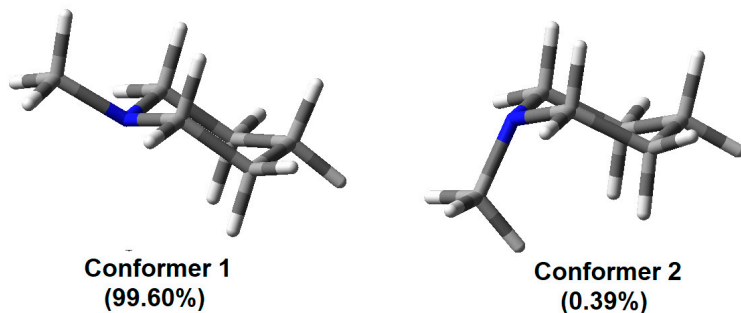

**Compound 41: Cyclohexanone**

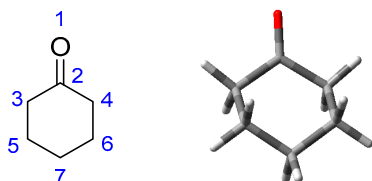

| Atom # | Carbon Attachment | Atom | Calculated Atomic Coordinates <sup>a</sup> |           |           | Experimental $\delta$ (ppm) |
|--------|-------------------|------|--------------------------------------------|-----------|-----------|-----------------------------|
|        |                   |      | x                                          | y         | z         |                             |
| 1      | -                 | O    | -1.263609                                  | 1.956120  | -0.000000 | -                           |
| 2      | -                 | C    | -0.413572                                  | 1.085927  | -0.000000 | 212.15                      |
| 3      | -                 | C    | 0.158071                                   | 0.501362  | 1.286793  | 42.00                       |
| 4      | -                 | C    | 0.158071                                   | 0.501362  | -1.286793 | 42.00                       |
| 5      | -                 | C    | 0.158071                                   | -1.042001 | 1.267030  | 27.03                       |
| 6      | -                 | C    | 0.158071                                   | -1.042001 | -1.267030 | 27.03                       |
| 7      | -                 | C    | 0.829137                                   | -1.591400 | 0.000000  | 25.02                       |
| 8      | C3                | H    | 1.196136                                   | 0.856697  | 1.380658  | 2.34                        |
| 9      | C3                | H    | -0.407459                                  | 0.903074  | 2.132693  | 2.34                        |
| 10     | C4                | H    | 1.196136                                   | 0.856697  | -1.380658 | 2.34                        |
| 11     | C4                | H    | -0.407459                                  | 0.903074  | -2.132693 | 2.34                        |
| 12     | C5                | H    | 0.658987                                   | -1.421571 | 2.165729  | 1.87                        |
| 13     | C5                | H    | -0.879451                                  | -1.401316 | 1.312464  | 1.87                        |
| 14     | C6                | H    | 0.658987                                   | -1.421571 | -2.165729 | 1.87                        |
| 15     | C6                | H    | -0.879451                                  | -1.421571 | -1.312464 | 1.87                        |
| 16     | C7                | H    | 1.893839                                   | -1.314426 | 0.000000  | 1.72                        |
| 17     | C7                | H    | 0.791517                                   | -2.687790 | 0.000000  | 1.72                        |

<sup>a</sup>: Atomic coordinates are for conformer 1, which represents 98.91% of the Boltzmann population.

Cyclohexanone exhibits two conformations, chair and twist-boat. The chair configuration comprises 98.91% of the Boltzmann population, allowing for the twist-boat conformation to be ignored in chemical shift calculations.

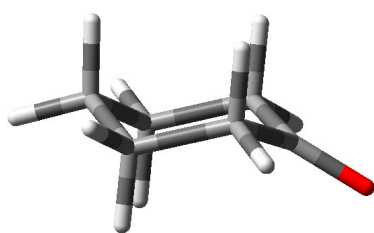

**Conformer 1**  
(98.91%)

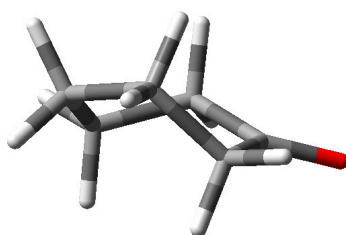

**Conformer 2**  
(1.09%)

**Compound 42: Cyclohex-2-en-1-one (2-Cyclohexenone)**

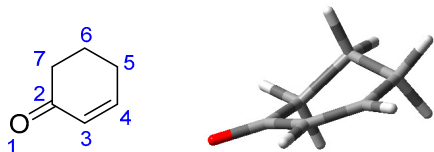

| Atom # | Carbon Attachment | Atom | Calculated Atomic Coordinates |           |           | Experimental $\delta$ (ppm) |
|--------|-------------------|------|-------------------------------|-----------|-----------|-----------------------------|
|        |                   |      | x                             | y         | z         |                             |
| 1      | -                 | O    | -2.361295                     | 0.001724  | -0.080774 | -                           |
| 2      | -                 | C    | -1.143351                     | 0.022365  | 0.018018  | 199.74                      |
| 3      | -                 | C    | -0.380622                     | 1.289614  | -0.051625 | 129.99                      |
| 4      | -                 | C    | 0.960739                      | 1.326104  | 0.025453  | 150.61                      |
| 5      | -                 | C    | 1.819221                      | 0.093708  | 0.131664  | 25.69                       |
| 6      | -                 | C    | 1.075885                      | -1.163703 | -0.342437 | 22.75                       |
| 7      | -                 | C    | -0.328663                     | -1.243271 | 0.271587  | 38.13                       |
| 8      | C3                | H    | -0.974066                     | 2.195379  | -0.146979 | 6.03                        |
| 9      | C4                | H    | 1.470878                      | 2.288967  | 0.014595  | 7.00                        |
| 10     | C5                | H    | 2.743146                      | 0.236151  | -0.443511 | 2.35                        |
| 11     | C5                | H    | 2.140602                      | -0.025522 | 1.179610  | 2.35                        |
| 12     | C6                | H    | 0.988069                      | -1.130692 | -1.436432 | 2.03                        |
| 13     | C6                | H    | 1.652501                      | -2.063136 | -0.097731 | 2.03                        |
| 14     | C7                | H    | -0.898731                     | -2.099010 | -0.102835 | 2.44                        |
| 15     | C7                | H    | -0.251295                     | -1.364837 | 1.363507  | 2.44                        |

**Compound 43: Fluorobenzene**

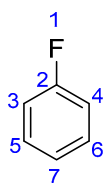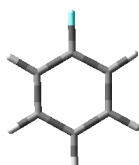

| Atom # | Carbon Attachment | Atom | Calculated Atomic Coordinates |           |           | Experimental $\delta$ (ppm) |
|--------|-------------------|------|-------------------------------|-----------|-----------|-----------------------------|
|        |                   |      | x                             | y         | z         |                             |
| 1      | -                 | F    | 0.000000                      | 0.000000  | 2.282591  | -                           |
| 2      | -                 | C    | 0.000000                      | 0.000000  | 0.931458  | 162.86                      |
| 3      | -                 | C    | -0.000000                     | 1.217551  | 0.260430  | 115.32                      |
| 4      | -                 | C    | -0.000000                     | -1.217551 | 0.260430  | 115.32                      |
| 5      | -                 | C    | -0.000000                     | 1.208664  | -1.135566 | 129.96                      |
| 6      | -                 | C    | -0.000000                     | -1.208664 | -1.135566 | 129.96                      |
| 7      | -                 | C    | -0.000000                     | -0.000000 | -1.835837 | 123.98                      |
| 8      | C3                | H    | -0.000000                     | 2.142010  | 0.828608  | 7.06                        |
| 9      | C4                | H    | -0.000000                     | -2.142010 | 0.828608  | 7.06                        |
| 10     | C5                | H    | -0.000000                     | 2.151613  | -1.675360 | 7.34                        |
| 11     | C6                | H    | -0.000000                     | -2.151613 | -1.675360 | 7.34                        |
| 12     | C7                | H    | -0.000000                     | -0.000000 | -2.921902 | 7.13                        |

**Compound 44: Nitrobenzene**

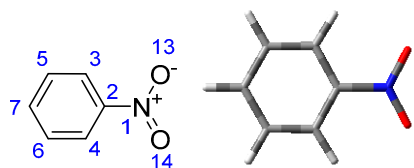

| Atom # | Carbon Attachment | Atom | Calculated Atomic Coordinates |           |           | Experimental $\delta$ (ppm) |
|--------|-------------------|------|-------------------------------|-----------|-----------|-----------------------------|
|        |                   |      | x                             | y         | z         |                             |
| 1      | -                 | N    | -0.000000                     | -0.000000 | 1.717815  | -                           |
| 2      | -                 | C    | -0.000000                     | -0.000000 | 0.245092  | 148.25                      |
| 3      | -                 | C    | 0.000000                      | 1.220735  | -0.427765 | 123.52                      |
| 4      | -                 | C    | -0.000000                     | -1.220735 | -0.427765 | 123.52                      |
| 5      | -                 | C    | 0.000000                      | 1.212318  | -1.821048 | 129.31                      |
| 6      | -                 | C    | -0.000000                     | -1.212318 | -1.821048 | 129.31                      |
| 7      | -                 | C    | 0.000000                      | 0.000000  | -2.516503 | 134.56                      |
| 8      | C3                | H    | 0.000000                      | 2.142803  | 0.140191  | 8.24                        |
| 9      | C4                | H    | -0.000000                     | -2.142803 | 0.140191  | 8.24                        |
| 10     | C5                | H    | 0.000000                      | 2.153082  | -2.363343 | 7.56                        |
| 11     | C6                | H    | -0.000000                     | -2.153082 | -2.363343 | 7.56                        |
| 12     | C7                | H    | 0.000000                      | 0.000000  | -3.602893 | 7.70                        |
| 13     | -                 | O    | 0.000000                      | 1.089518  | 2.289919  | -                           |
| 14     | -                 | O    | -0.000000                     | -1.089518 | 2.289919  | -                           |

**Compound 45: 1,4-Benzoquinone (p-Benzoquinone)**

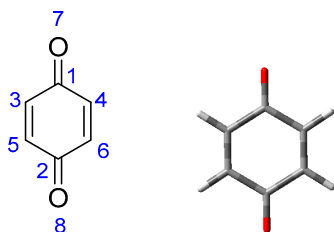

| Atom # | Carbon Attachment | Atom | Calculated Atomic Coordinates |           |           | Experimental $\delta$ (ppm) |
|--------|-------------------|------|-------------------------------|-----------|-----------|-----------------------------|
|        |                   |      | x                             | y         | z         |                             |
| 1      | -                 | C    | 0.000000                      | -0.000000 | 1.445285  | 187.21                      |
| 2      | -                 | C    | 0.000000                      | -0.000000 | -1.445285 | 187.21                      |
| 3      | -                 | C    | 0.000000                      | 1.269144  | 0.671532  | 136.56                      |
| 4      | -                 | C    | -0.000000                     | -1.269144 | 0.671532  | 136.56                      |
| 5      | -                 | C    | 0.000000                      | 1.269144  | -0.671532 | 136.56                      |
| 6      | -                 | C    | -0.000000                     | -1.269144 | -0.671532 | 136.56                      |
| 7      | -                 | O    | 0.000000                      | -0.000000 | 2.670223  | -                           |
| 8      | -                 | O    | 0.000000                      | -0.000000 | -2.670223 | -                           |
| 9      | C3                | H    | 0.000000                      | 2.182717  | 1.259654  | 6.79                        |
| 10     | C4                | H    | -0.000000                     | -2.182717 | 1.259654  | 6.79                        |
| 11     | C5                | H    | 0.000000                      | 2.182717  | -1.259654 | 6.79                        |
| 12     | C6                | H    | -0.000000                     | -2.182717 | -1.259654 | 6.79                        |

**Compound 46: Toluene**

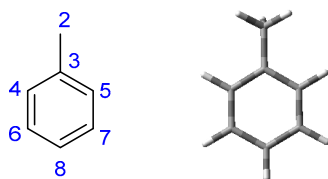

| Atom # | Carbon Attachment | Atom | Calculated Atomic Coordinates |           |           | Experimental $\delta$ (ppm) |
|--------|-------------------|------|-------------------------------|-----------|-----------|-----------------------------|
|        |                   |      | x                             | y         | z         |                             |
| 1      | C2                | H    | 1.060485                      | 2.801442  | -0.000000 | 2.36                        |
| 2      | -                 | C    | 0.028512                      | 2.425416  | -0.000000 | 21.46                       |
| 3      | -                 | C    | -0.004238                     | 0.913882  | -0.000000 | 137.89                      |
| 4      | -                 | C    | -0.007351                     | 0.194294  | 1.202312  | 129.05                      |
| 5      | -                 | C    | -0.007351                     | 0.194294  | -1.202312 | 129.05                      |
| 6      | -                 | C    | -0.007351                     | -1.201161 | 1.205396  | 128.24                      |
| 7      | -                 | C    | -0.007351                     | -1.201161 | -1.205396 | 128.24                      |
| 8      | -                 | C    | -0.006588                     | -1.905024 | 0.000000  | 125.31                      |
| 9      | C4                | H    | -0.011732                     | 0.734438  | 2.146855  | 7.17                        |
| 10     | C5                | H    | -0.011732                     | 0.734438  | -2.146855 | 7.17                        |
| 11     | C6                | H    | -0.012171                     | -1.738466 | 2.150420  | 7.25                        |
| 12     | C7                | H    | -0.012171                     | -1.738466 | -2.150420 | 7.25                        |
| 13     | C8                | H    | -0.009692                     | -2.991785 | 0.000000  | 7.16                        |
| 14     | C2                | H    | -0.466342                     | 2.837579  | -0.886013 | 2.36                        |
| 15     | C2                | H    | -0.466342                     | 2.837579  | 0.886013  | 2.36                        |



**Compound 47: Norbornadiene (2,5-Norbornadiene)**

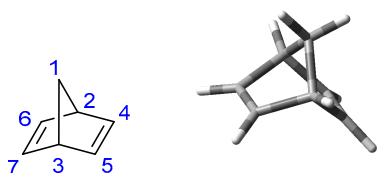

| Atom # | Carbon Attachment | Atom | Calculated Atomic Coordinates |           |           | Experimental $\delta$ (ppm) |
|--------|-------------------|------|-------------------------------|-----------|-----------|-----------------------------|
|        |                   |      | x                             | y         | z         |                             |
| 1      | -                 | C    | 0.000000                      | 0.000000  | 1.355167  | 75.32                       |
| 2      | -                 | C    | 0.000000                      | 1.122368  | 0.271791  | 50.26                       |
| 3      | -                 | C    | -0.000000                     | -1.122368 | 0.271791  | 50.26                       |
| 4      | -                 | C    | 1.245986                      | 0.667933  | -0.520792 | 143.43                      |
| 5      | -                 | C    | 1.245986                      | -0.667933 | -0.520792 | 143.43                      |
| 6      | -                 | C    | -1.245986                     | 0.667933  | -0.520792 | 143.43                      |
| 7      | -                 | C    | -1.245986                     | -0.667933 | -0.520792 | 143.43                      |
| 8      | C1                | H    | 0.899910                      | -0.000000 | 1.979632  | 1.99                        |
| 9      | C1                | H    | -0.899910                     | 0.000000  | 1.979632  | 1.99                        |
| 10     | C2                | H    | 0.000000                      | 2.159751  | 0.612341  | 3.58                        |
| 11     | C3                | H    | -0.000000                     | -2.159751 | 0.612341  | 3.58                        |
| 12     | C4                | H    | 1.937013                      | 1.338860  | -1.019357 | 6.76                        |
| 13     | C5                | H    | 1.937013                      | -1.338860 | -1.019357 | 6.76                        |
| 14     | C6                | H    | -1.937013                     | 1.338860  | -1.019357 | 6.76                        |
| 15     | C7                | H    | -1.937013                     | -1.338860 | -1.019357 | 6.76                        |

**Compound 48: Anisole**

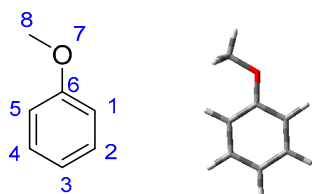

| Atom # | Carbon Attachment | Atom | Calculated Atomic Coordinates |           |           | Experimental $\delta$ (ppm) |
|--------|-------------------|------|-------------------------------|-----------|-----------|-----------------------------|
|        |                   |      | x                             | y         | z         |                             |
| 1      | -                 | C    | 0.000000                      | 0.529515  | 0.000000  | 113.90                      |
| 2      | -                 | C    | -1.373336                     | 0.242655  | 0.000000  | 129.45                      |
| 3      | -                 | C    | -1.808034                     | -1.077795 | 0.000000  | 120.65                      |
| 4      | -                 | C    | -0.886000                     | -2.130483 | 0.000000  | 129.45                      |
| 5      | -                 | C    | 0.476156                      | -1.839995 | 0.000000  | 113.90                      |
| 6      | -                 | C    | 0.930030                      | -0.516890 | 0.000000  | 159.55                      |
| 7      | -                 | O    | 0.325395                      | 1.857237  | 0.000000  | -                           |
| 8      | -                 | C    | 1.698003                      | 2.211176  | 0.000000  | 55.14                       |
| 9      | C1                | H    | -2.074585                     | 1.071481  | 0.000000  | 6.91                        |
| 10     | C2                | H    | -2.874609                     | -1.287350 | 0.000000  | 7.29                        |
| 11     | C3                | H    | -1.228212                     | -3.161259 | 0.000000  | 6.95                        |
| 12     | C4                | H    | 1.204690                      | -2.646844 | 0.000000  | 7.29                        |
| 13     | C5                | H    | 1.995503                      | -0.316937 | 0.000000  | 6.91                        |
| 14     | C8                | H    | 1.726725                      | 3.302499  | 0.000000  | 3.81                        |
| 15     | C8                | H    | 2.213204                      | 1.835708  | 0.894422  | 3.81                        |
| 16     | C8                | H    | 2.213204                      | 1.835708  | -0.894422 | 3.81                        |

**Compound 49: Maleic anhydride**

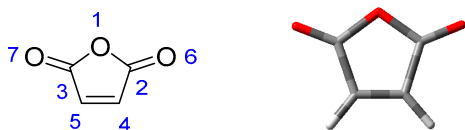

| Atom # | Carbon Attachment | Atom | Calculated Atomic Coordinates |           |           | Experimental $\delta$ (ppm) |
|--------|-------------------|------|-------------------------------|-----------|-----------|-----------------------------|
|        |                   |      | x                             | y         | z         |                             |
| 1      | -                 | O    | -0.000730                     | -0.971804 | 0.000000  | -                           |
| 2      | -                 | C    | -0.000164                     | -0.158714 | 1.131991  | 164.07                      |
| 3      | -                 | C    | -0.000164                     | -0.158714 | -1.131991 | 164.07                      |
| 4      | -                 | C    | 0.000754                      | 1.258255  | 0.667804  | 136.49                      |
| 5      | -                 | C    | 0.000754                      | 1.258255  | -0.667804 | 136.49                      |
| 6      | -                 | O    | -0.000164                     | -0.600004 | 2.245452  | -                           |
| 7      | -                 | O    | -0.000164                     | -0.600004 | -2.245452 | -                           |
| 8      | C4                | H    | 0.000693                      | 2.089998  | 1.360223  | 7.03                        |
| 9      | C5                | H    | 0.000693                      | 2.089998  | -1.360223 | 7.03                        |

**Compound 50: 2,5-Dihydrofuran**

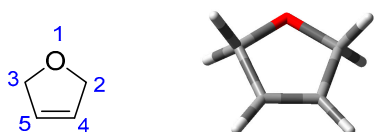

| Atom # | Carbon Attachment | Atom | Calculated Atomic Coordinates |           |           | Experimental $\delta$ (ppm) |
|--------|-------------------|------|-------------------------------|-----------|-----------|-----------------------------|
|        |                   |      | x                             | y         | z         |                             |
| 1      | -                 | O    | 0.000642                      | -1.189607 | -0.000000 | -                           |
| 2      | -                 | C    | -0.000207                     | -0.371239 | 1.172196  | 75.41                       |
| 3      | -                 | C    | -0.000207                     | -0.371239 | -1.172196 | 75.41                       |
| 4      | -                 | C    | -0.000207                     | 1.045499  | 0.665433  | 126.19                      |
| 5      | -                 | C    | -0.000207                     | 1.045499  | -0.665433 | 126.19                      |
| 6      | C2                | H    | -0.886896                     | -0.600210 | 1.785570  | 4.65                        |
| 7      | C2                | H    | 0.886347                      | -0.599315 | 1.786304  | 4.65                        |
| 8      | C3                | H    | -0.886896                     | -0.600210 | -1.785570 | 4.65                        |
| 9      | C3                | H    | 0.886347                      | -0.599315 | -1.786304 | 4.65                        |
| 10     | C4                | H    | 0.000462                      | 1.912389  | 1.317664  | 5.89                        |
| 11     | C5                | H    | 0.000462                      | 1.912389  | -1.317664 | 5.89                        |

## II. Experimental NMR Spectra for DELTA50 Compounds

Experimental  $^1\text{H}$  and  $^{13}\text{C}$  NMR spectra for each compound of the DELTA50 test set were acquired at 298 K for  $\leq 10$  mM samples dissolved in deuterated chloroform,  $\text{CDCl}_3$ , containing 0.03% v/v tetramethylsilane (TMS) for chemical shift reference. Potassium carbonate ( $\text{K}_2\text{CO}_3$ ) was used to neutralize residual  $\text{DCl}$  present in  $\text{CDCl}_3$ . All compounds, solvents, and reagents were at least 98% grade and purchased from Sigma-Aldrich. A 600 MHz Bruker AVANCE III HD NMR spectrometer equipped with a liquid  $\text{N}_2$ -cooled 5-mm broadband Prodigy<sup>TM</sup> probe was used for spectral acquisition. Spectra were processed in Mestrelab Research's MestReNova, version 14.2.

For a few compounds (*viz.*, DMF, DMAc, 2-methyl-2-butene, cyclopent-2-en-1-one, N-methylpiperidine, cyclohex-2-en-1-one, and toluene), peak assignments and chemical shifts were not immediately obvious from the 1D spectra. Thus, 1D selective NOESY and 2D NMR experiments were used to clarify any ambiguity. The spectra and processing parameters used were as follows:

- 1D  $^1\text{H}$  selective gradient **NOESY**: 500 ms mixing time, 32 scans, gauss 180 selective refocussing pulse shape, pulse program *selnogpzs.2* (uses zero-quantum suppression)
- $^1\text{H}$ - $^1\text{H}$  gradient **COSY**: 2 scans, 8 ppm spectral width, 2048 x 128 points, pulse program *cosygpppqf*, sine square  $0^\circ$  apodization in both F1 and F2.
- $^1\text{H}$ - $^{13}\text{C}$  multiplicity-edited gradient **HSQC**:  $^1J_{\text{CH}}$  delay optimized for 145 Hz, 4 scans, 8 ppm x 160 ppm spectral width, 2048 x 128 points, pulse program *hsqcedetgpsi2.3*, sine square  $90^\circ$  apodization in both F1 and F2.
- $^1\text{H}$ - $^{13}\text{C}$  gradient **HMBC**:  $^nJ_{\text{CH}}$  delay optimized for 8 Hz, 16 scans, 8 ppm x 210 ppm spectral width, pulse program *hmbcetgpl3nd*, magnitude mode phase correction along F2, sine square  $90^\circ$  apodization in F1 and sine bell  $45^\circ$  apodization in F2.

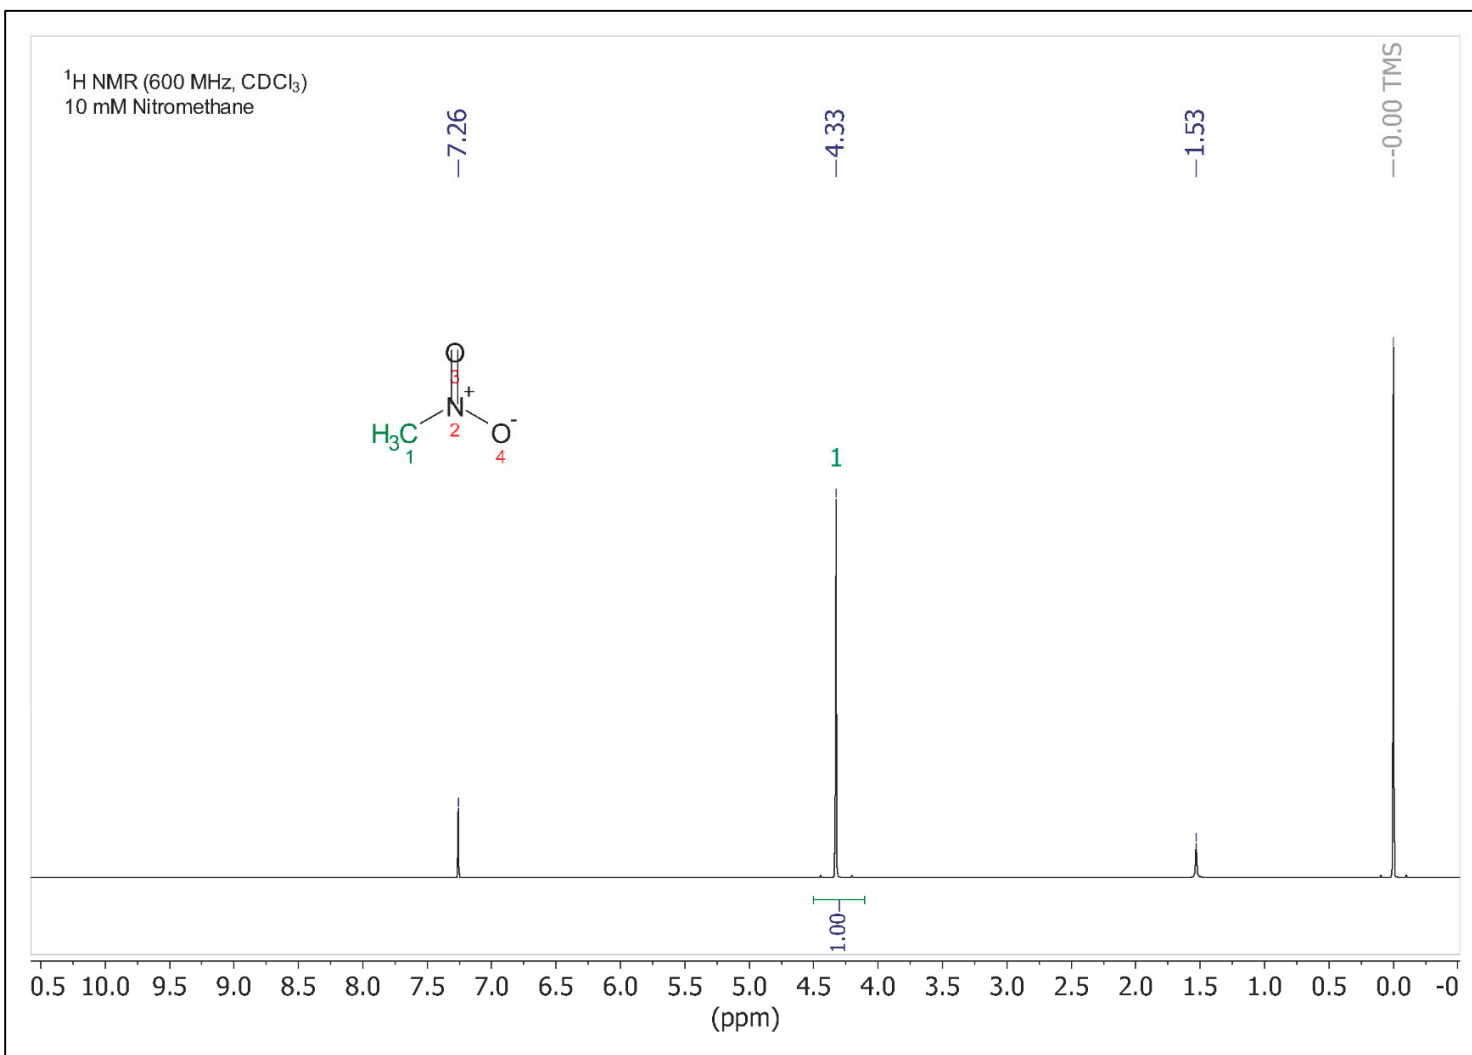

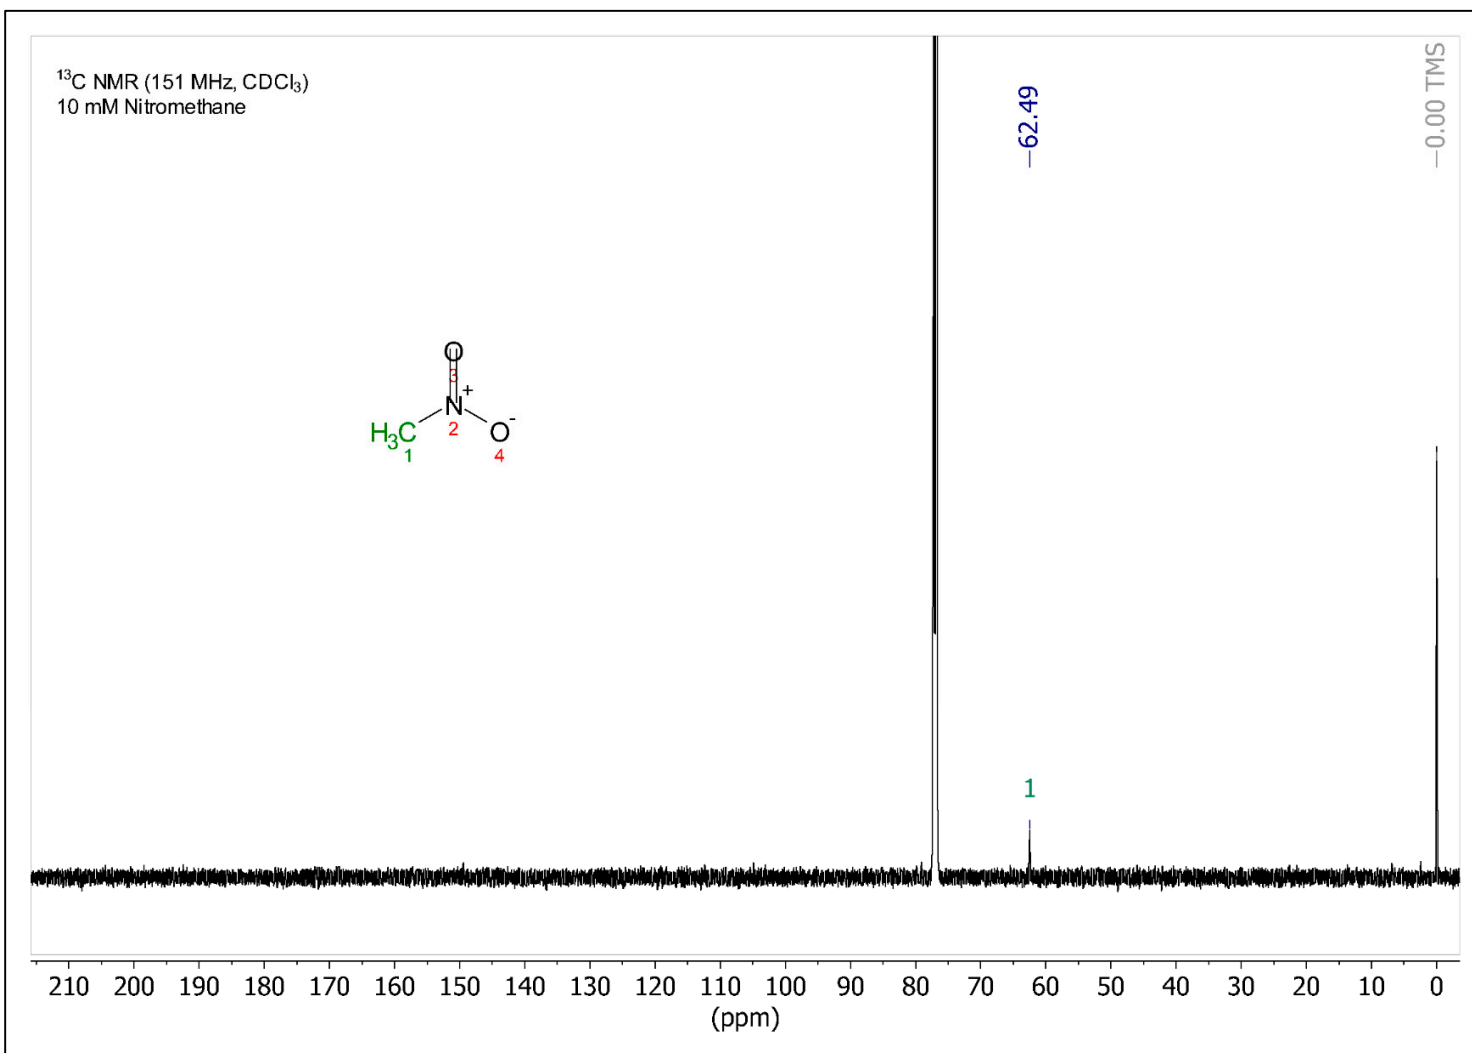

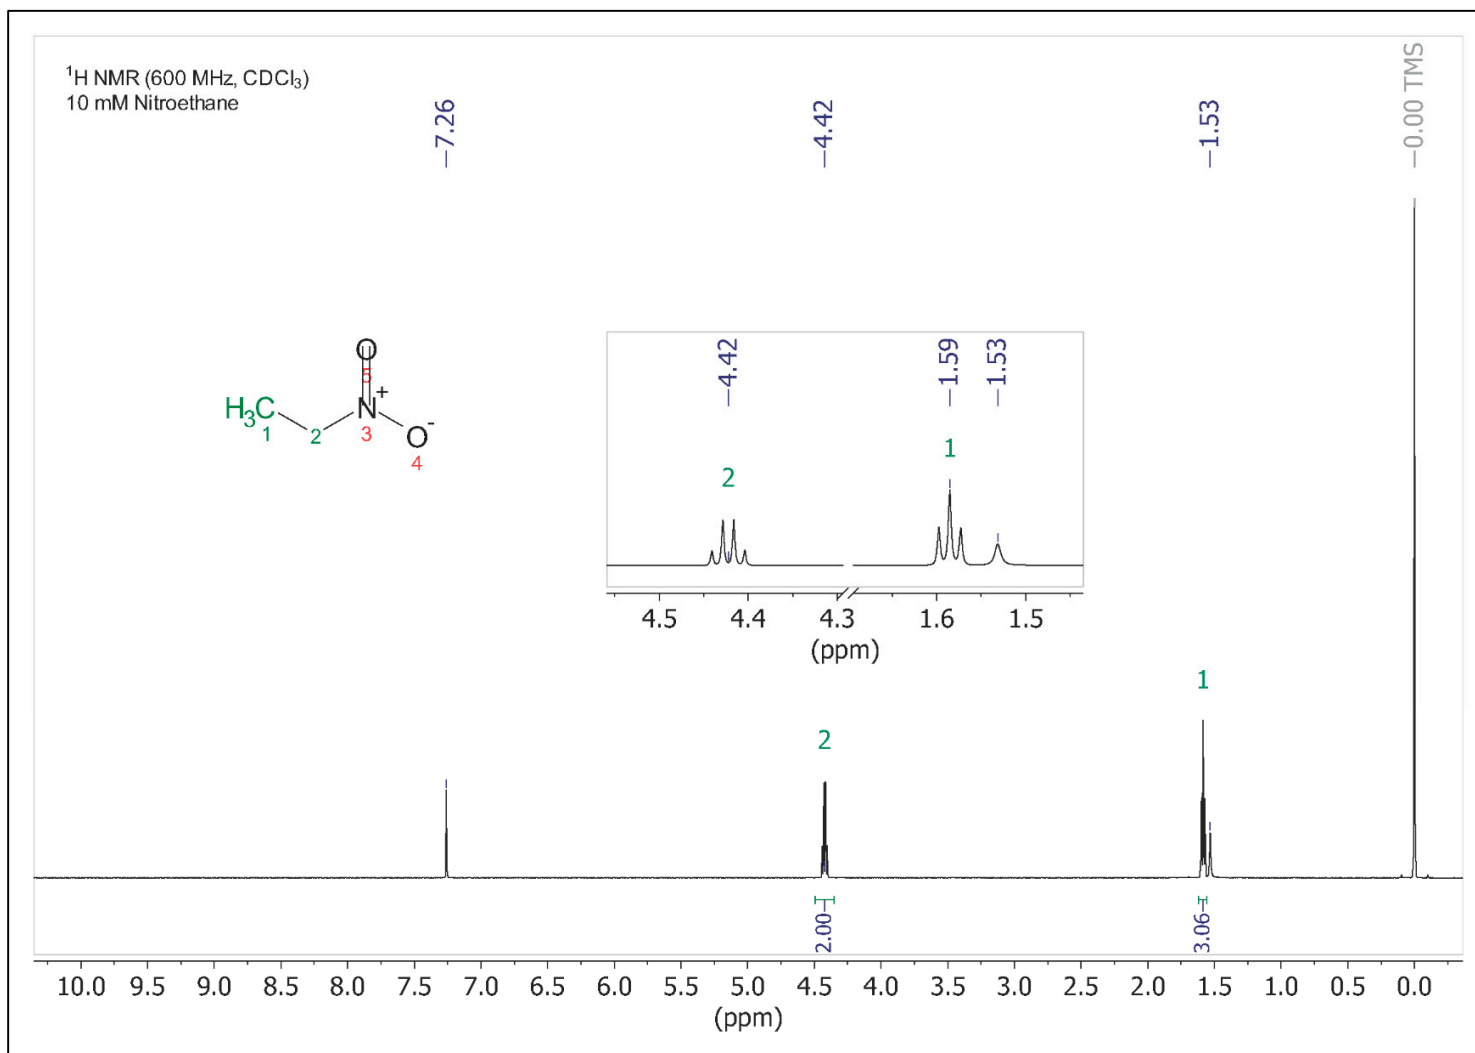

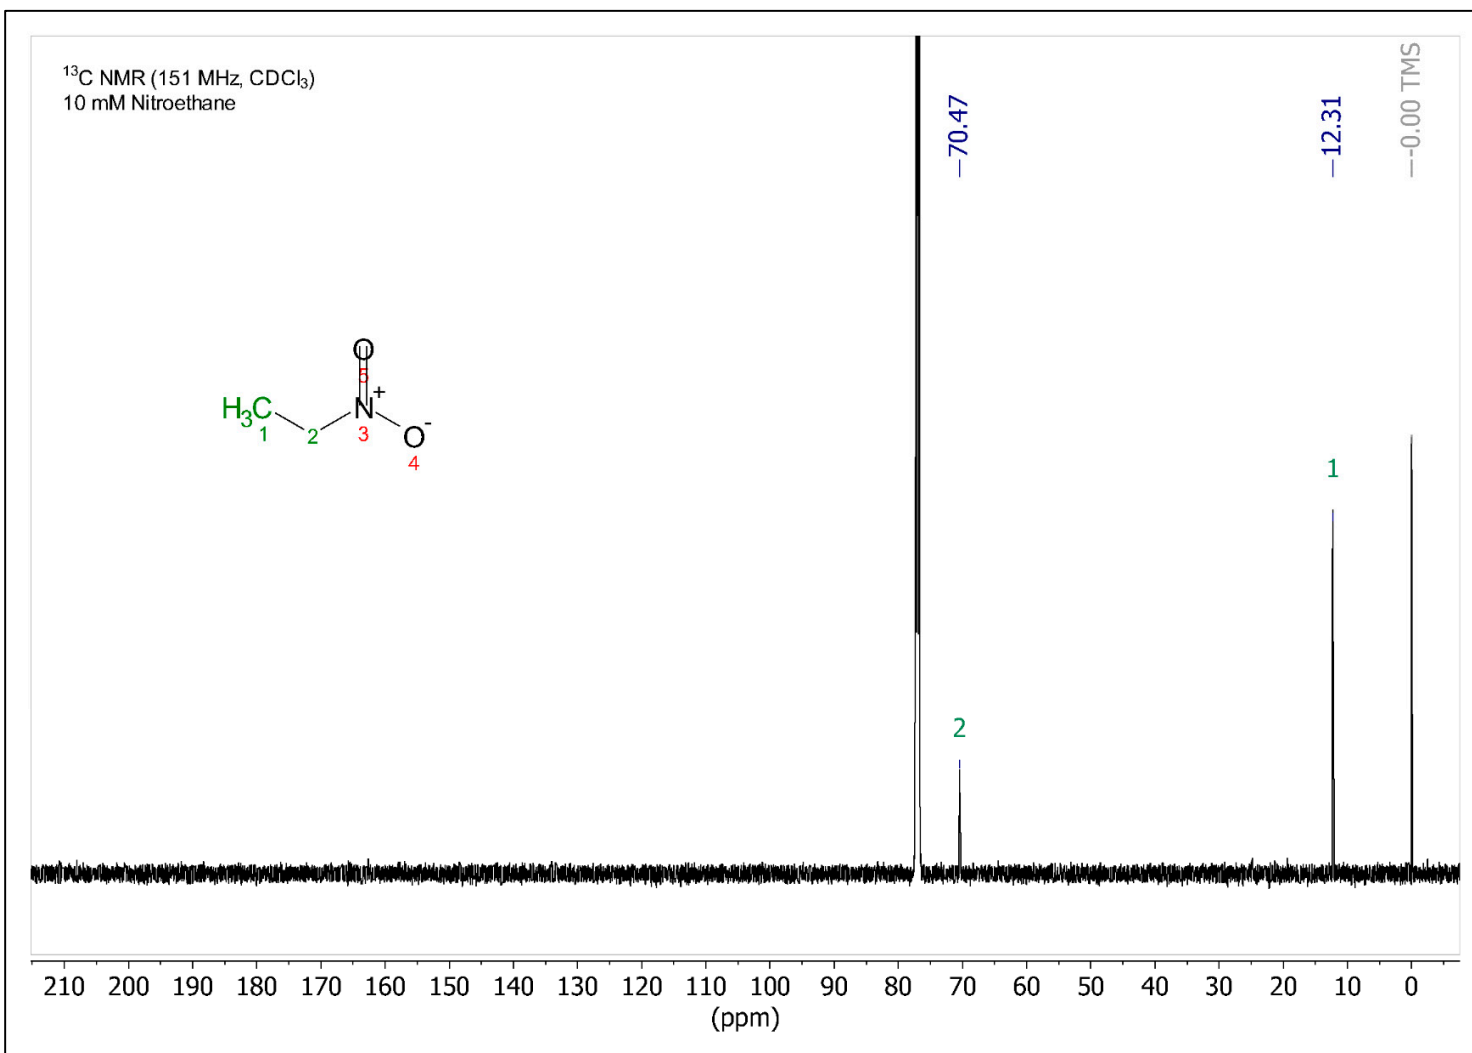



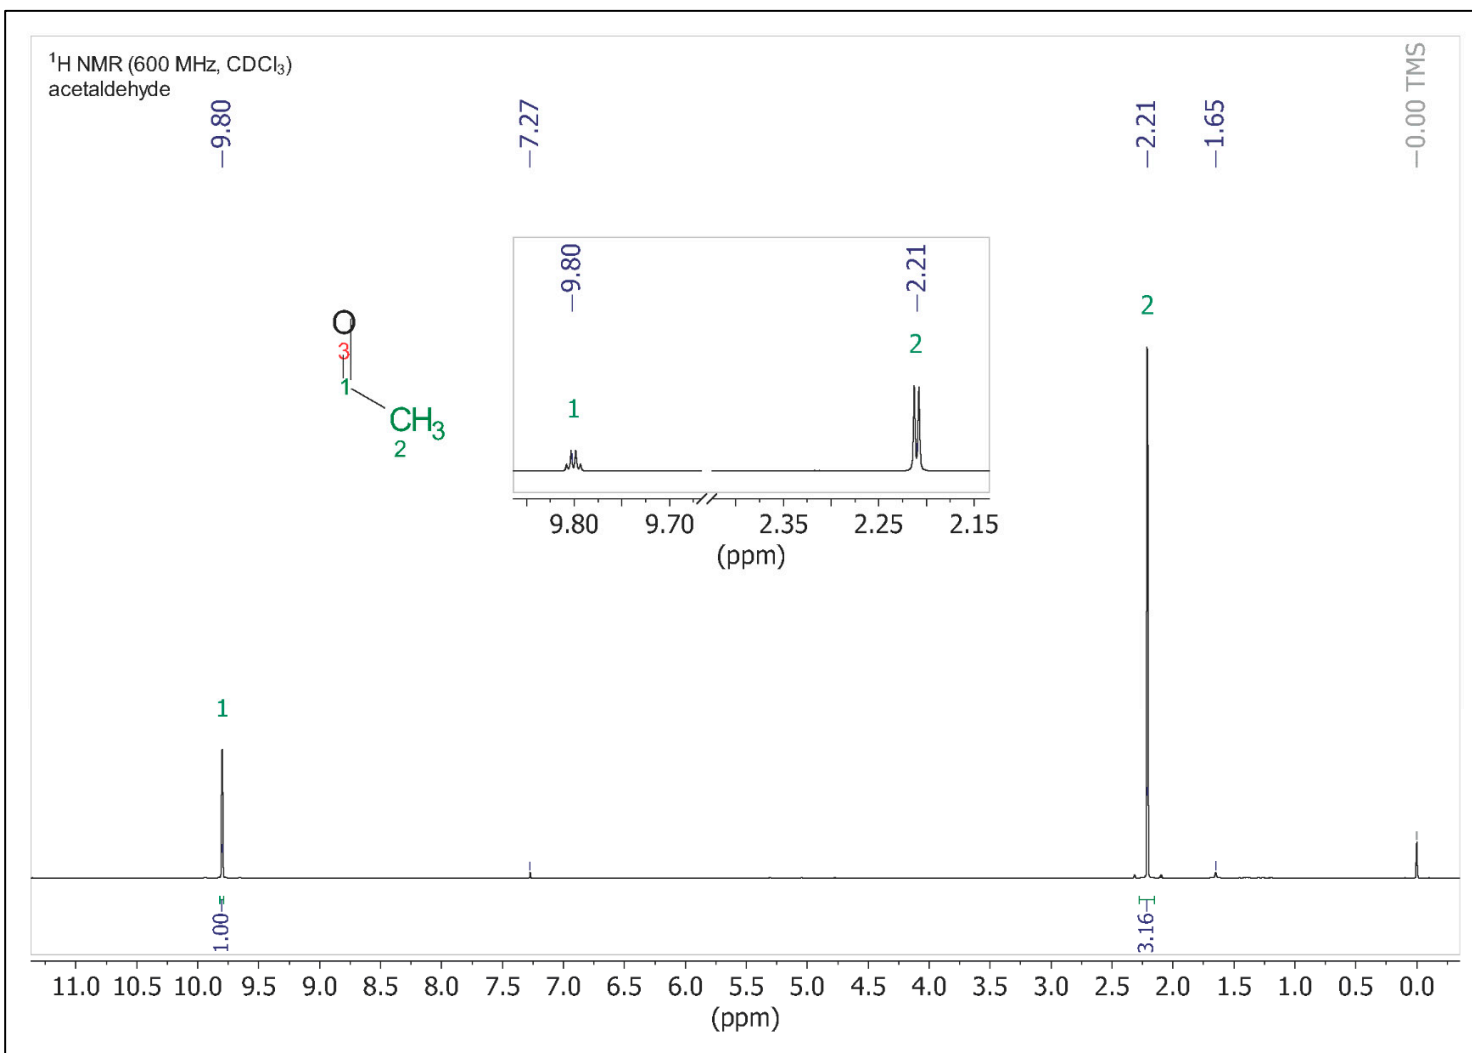

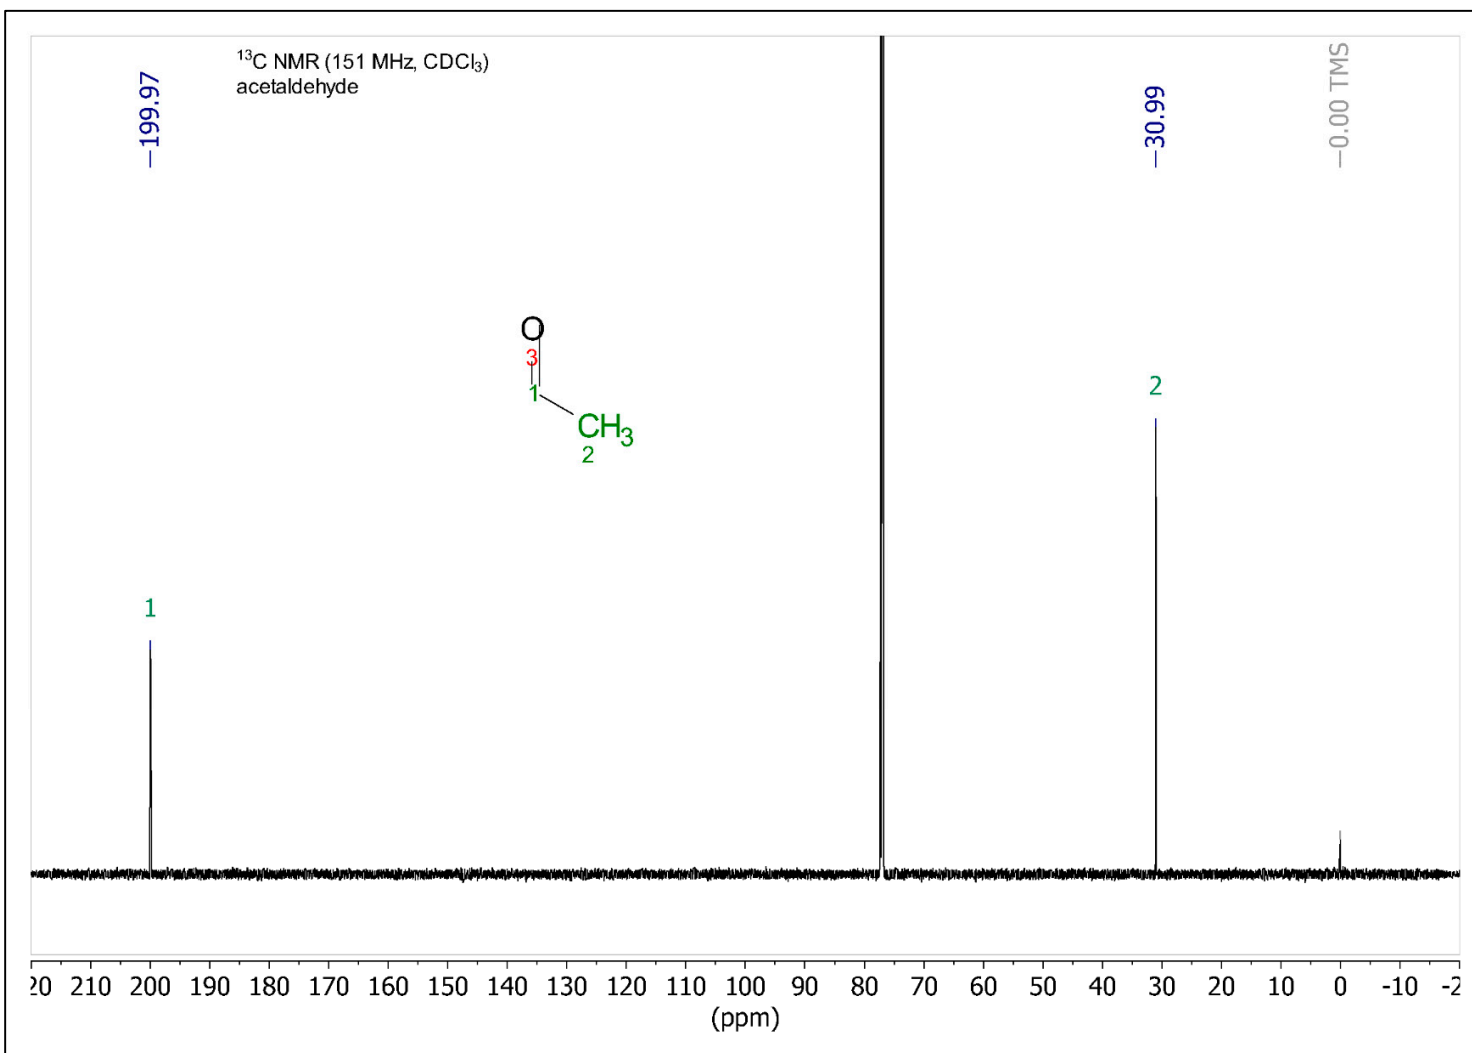

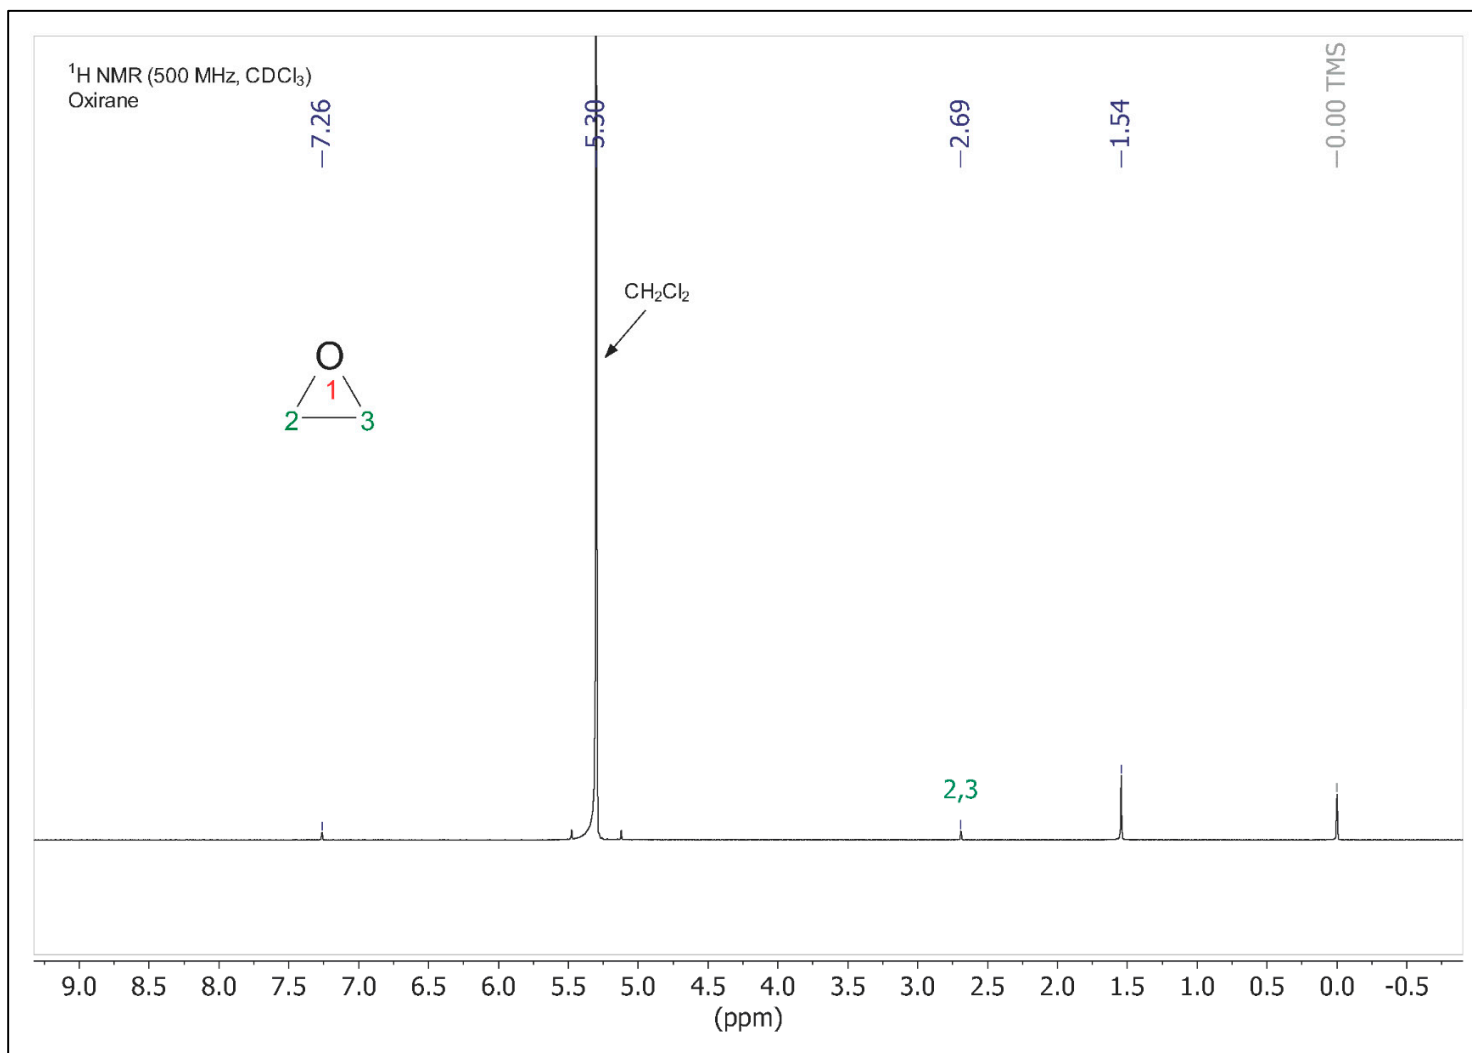

Note: Oxirane was obtained as a 2 mg/mL standard pre-dissolved in CH<sub>2</sub>Cl<sub>2</sub>.

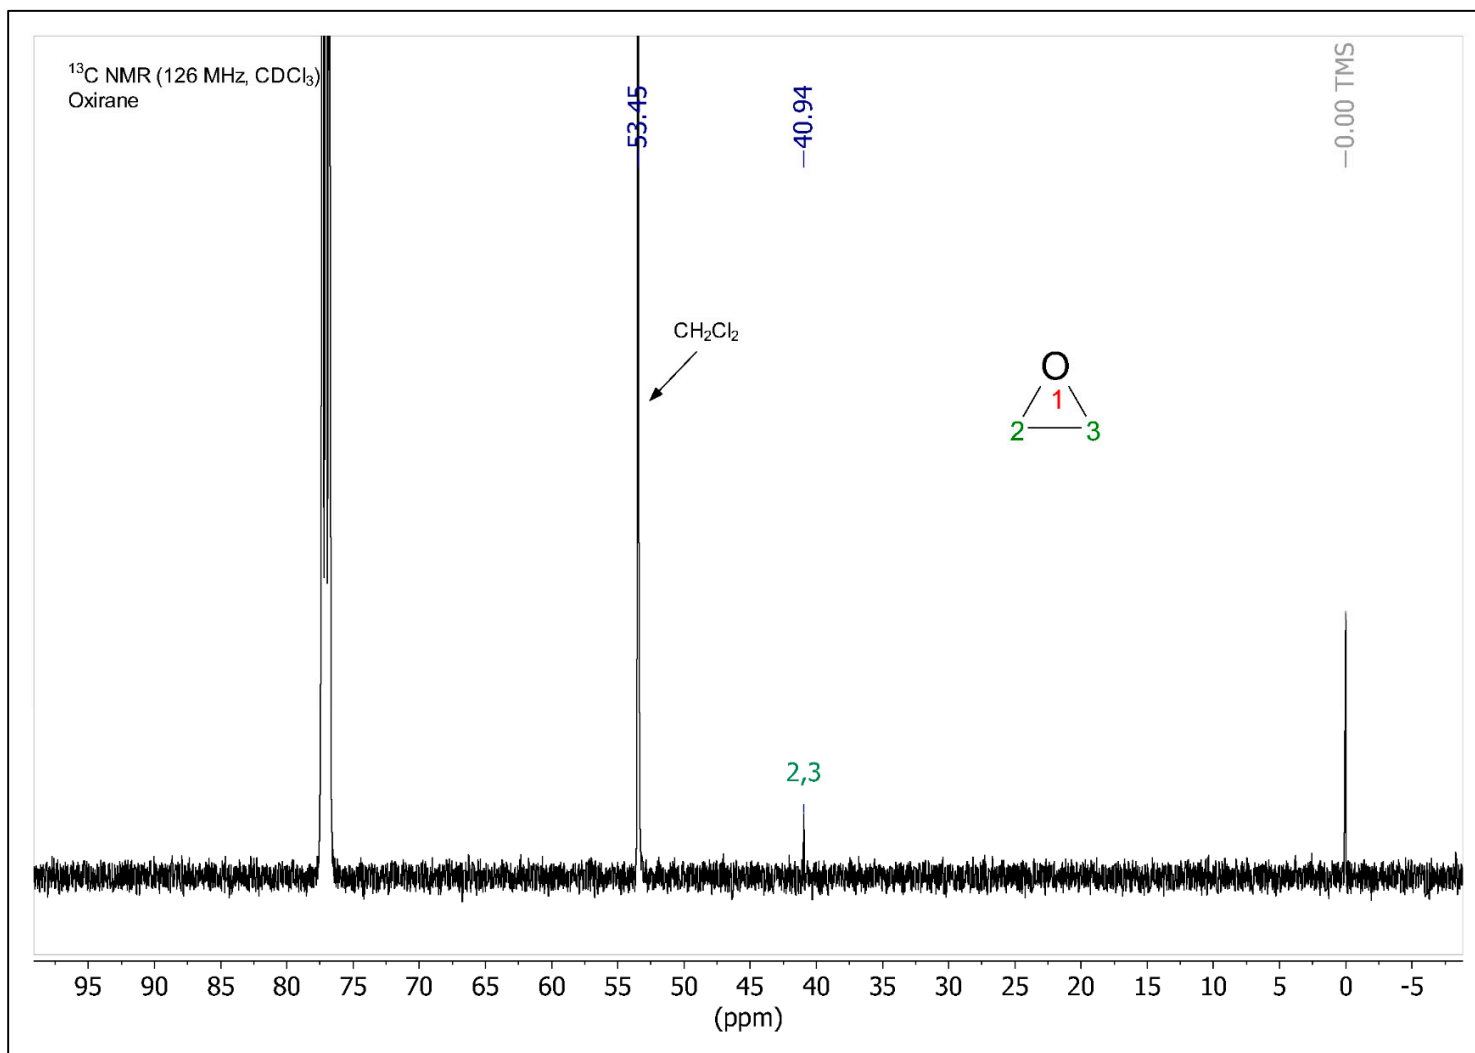

Note: Oxirane was obtained as a 2 mg/mL standard pre-dissolved in CH<sub>2</sub>Cl<sub>2</sub>.

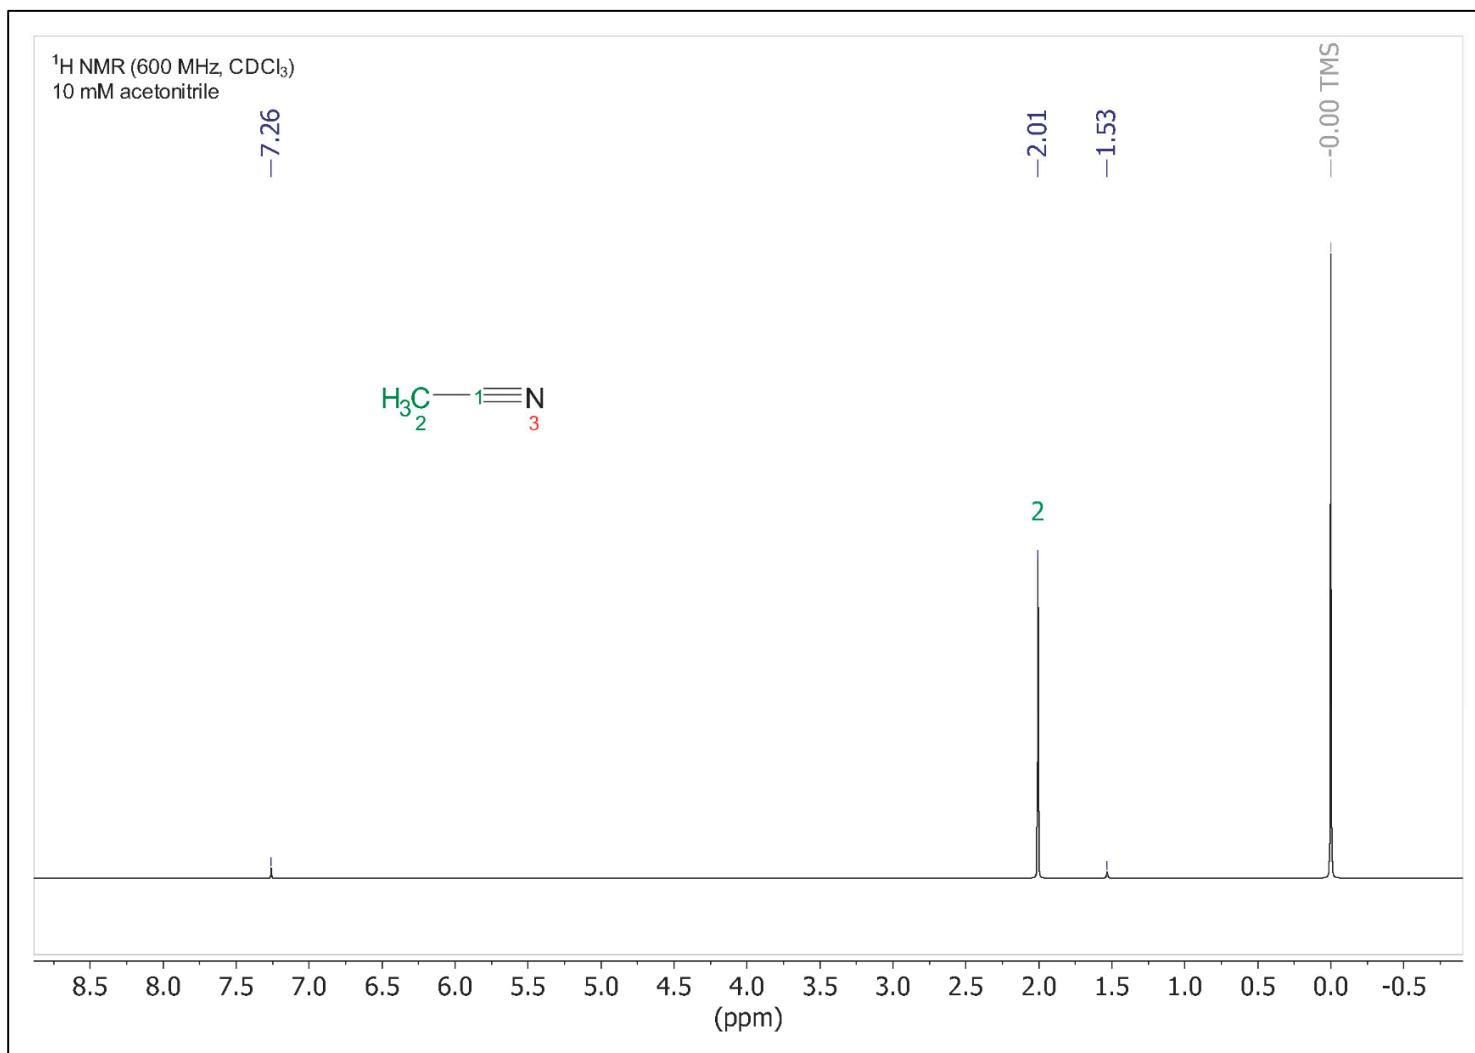

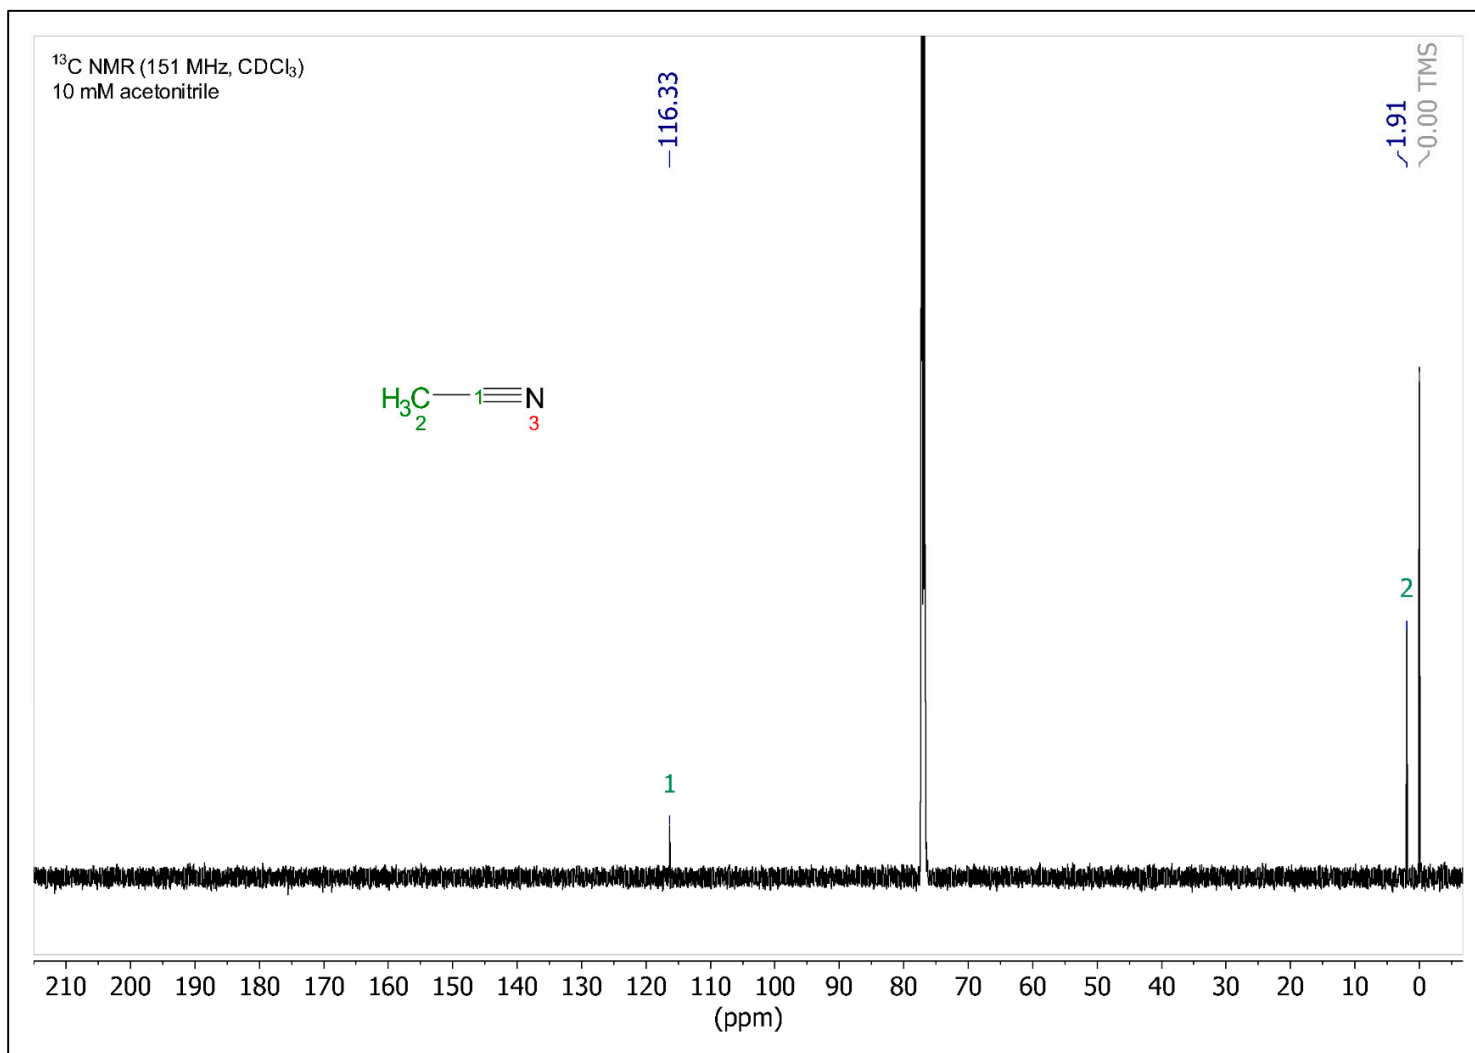

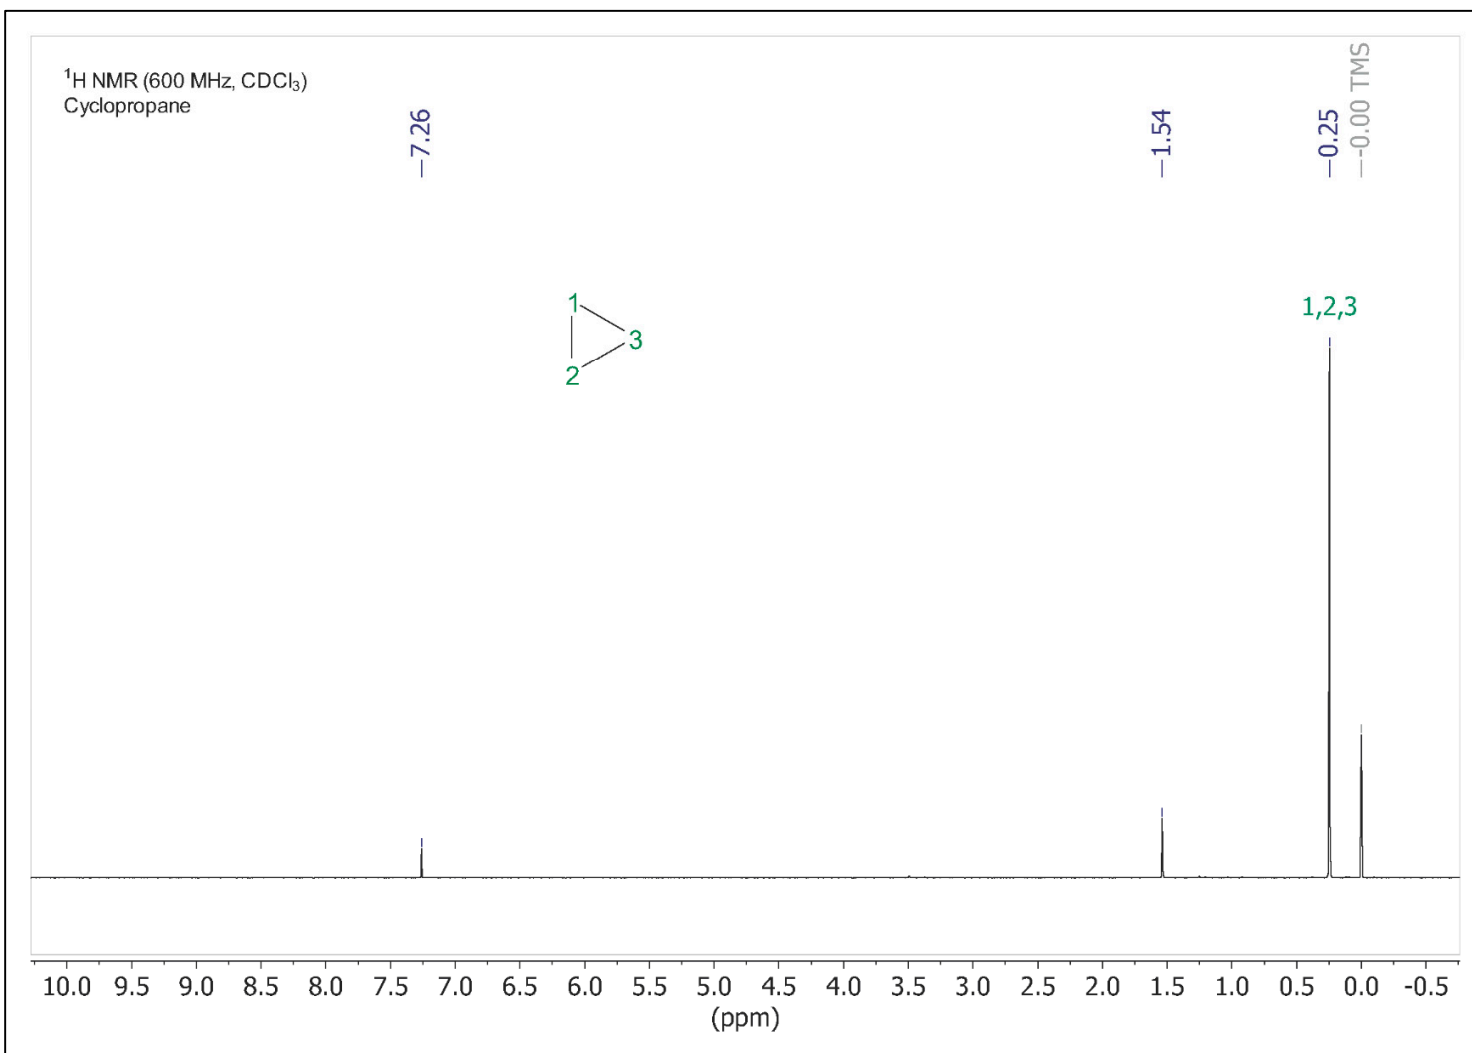

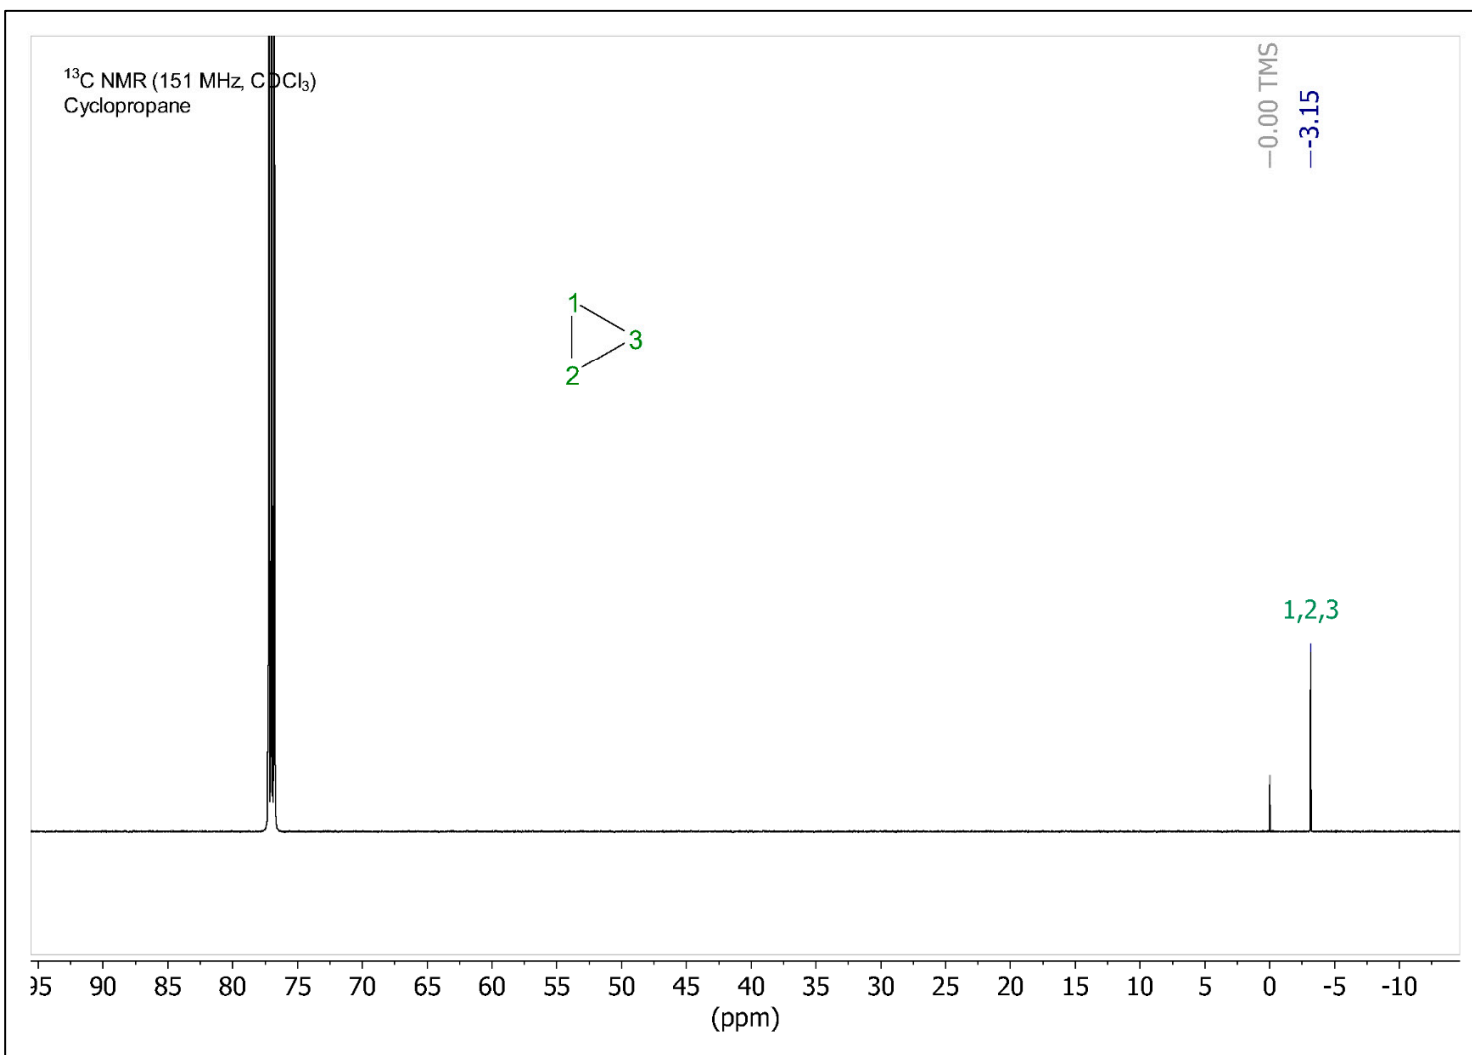



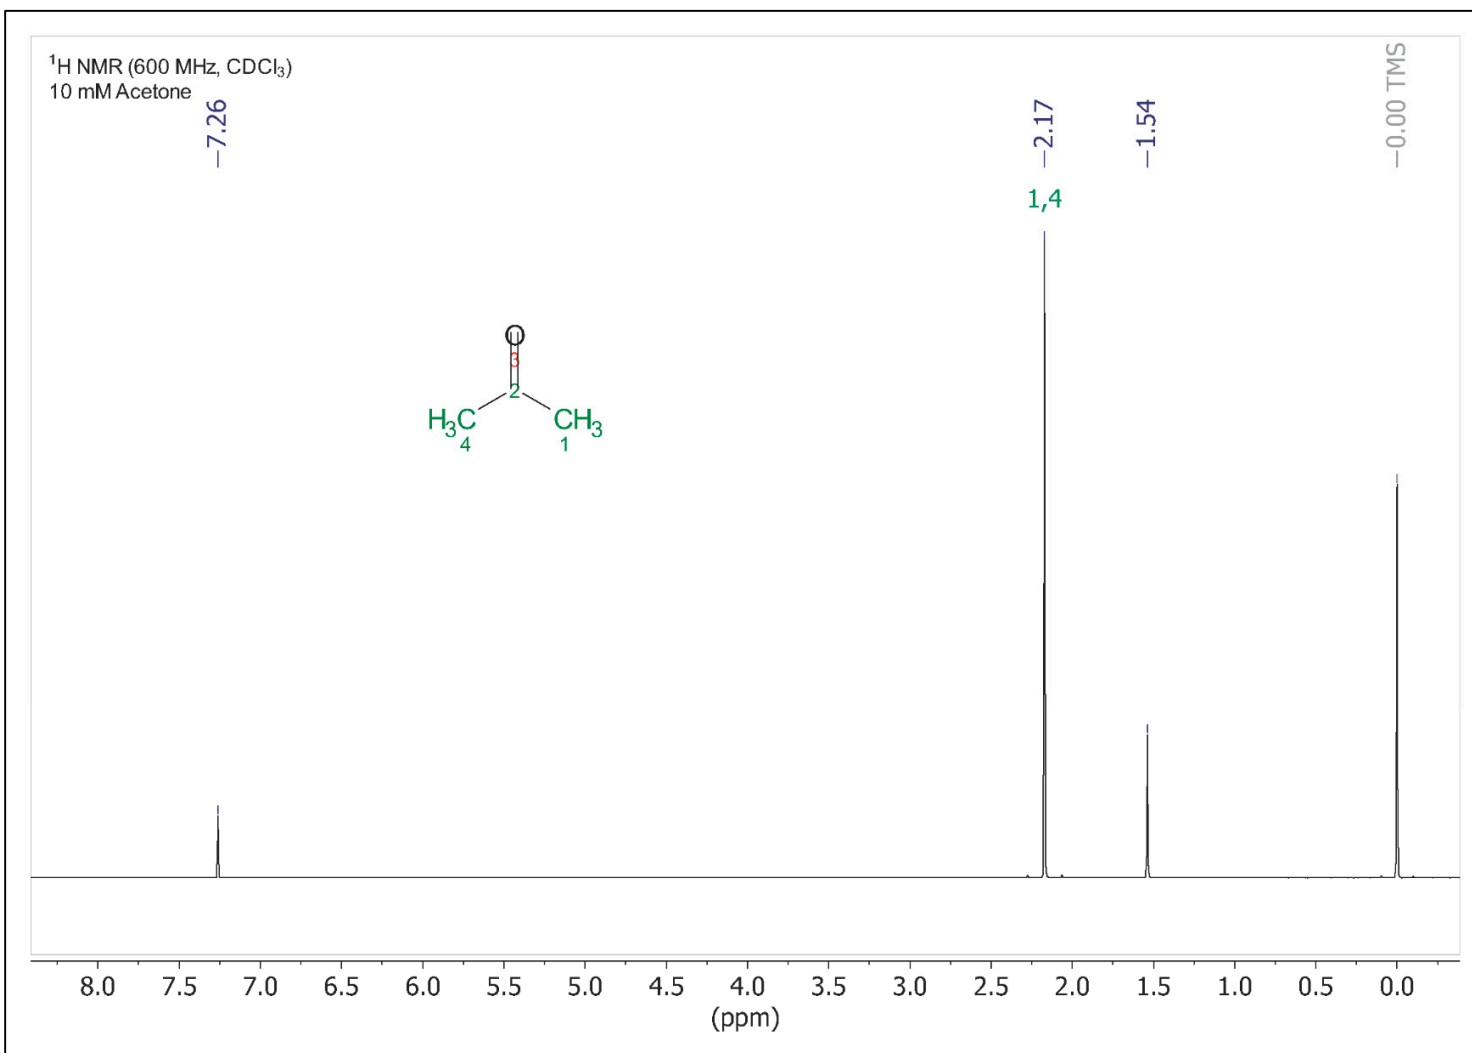

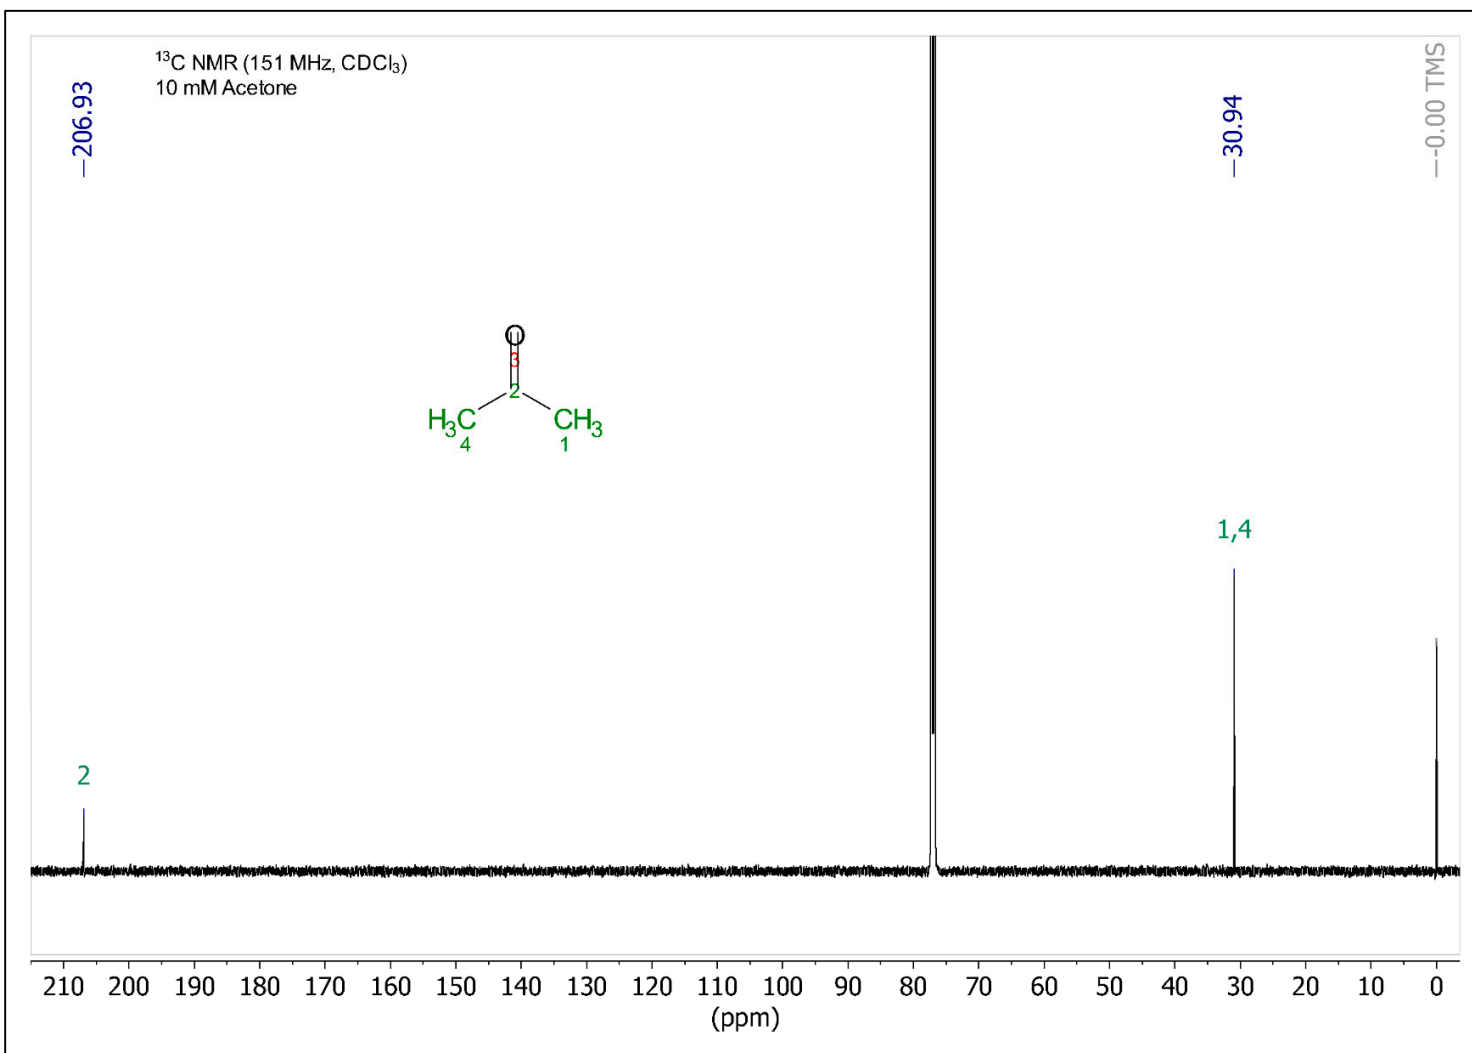

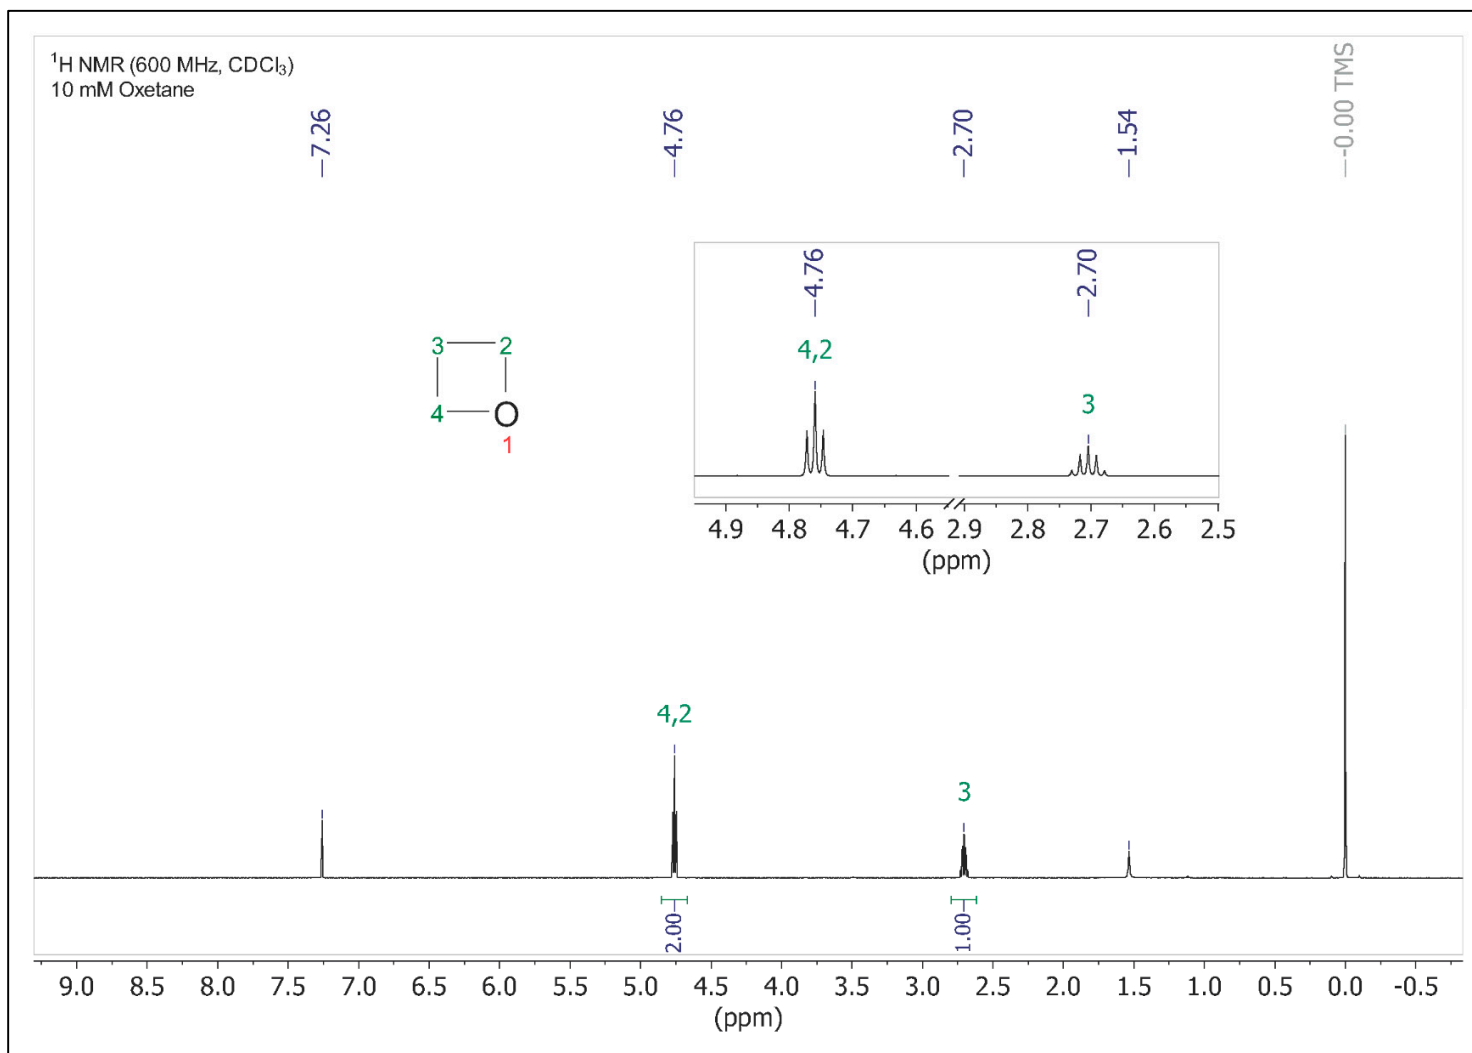

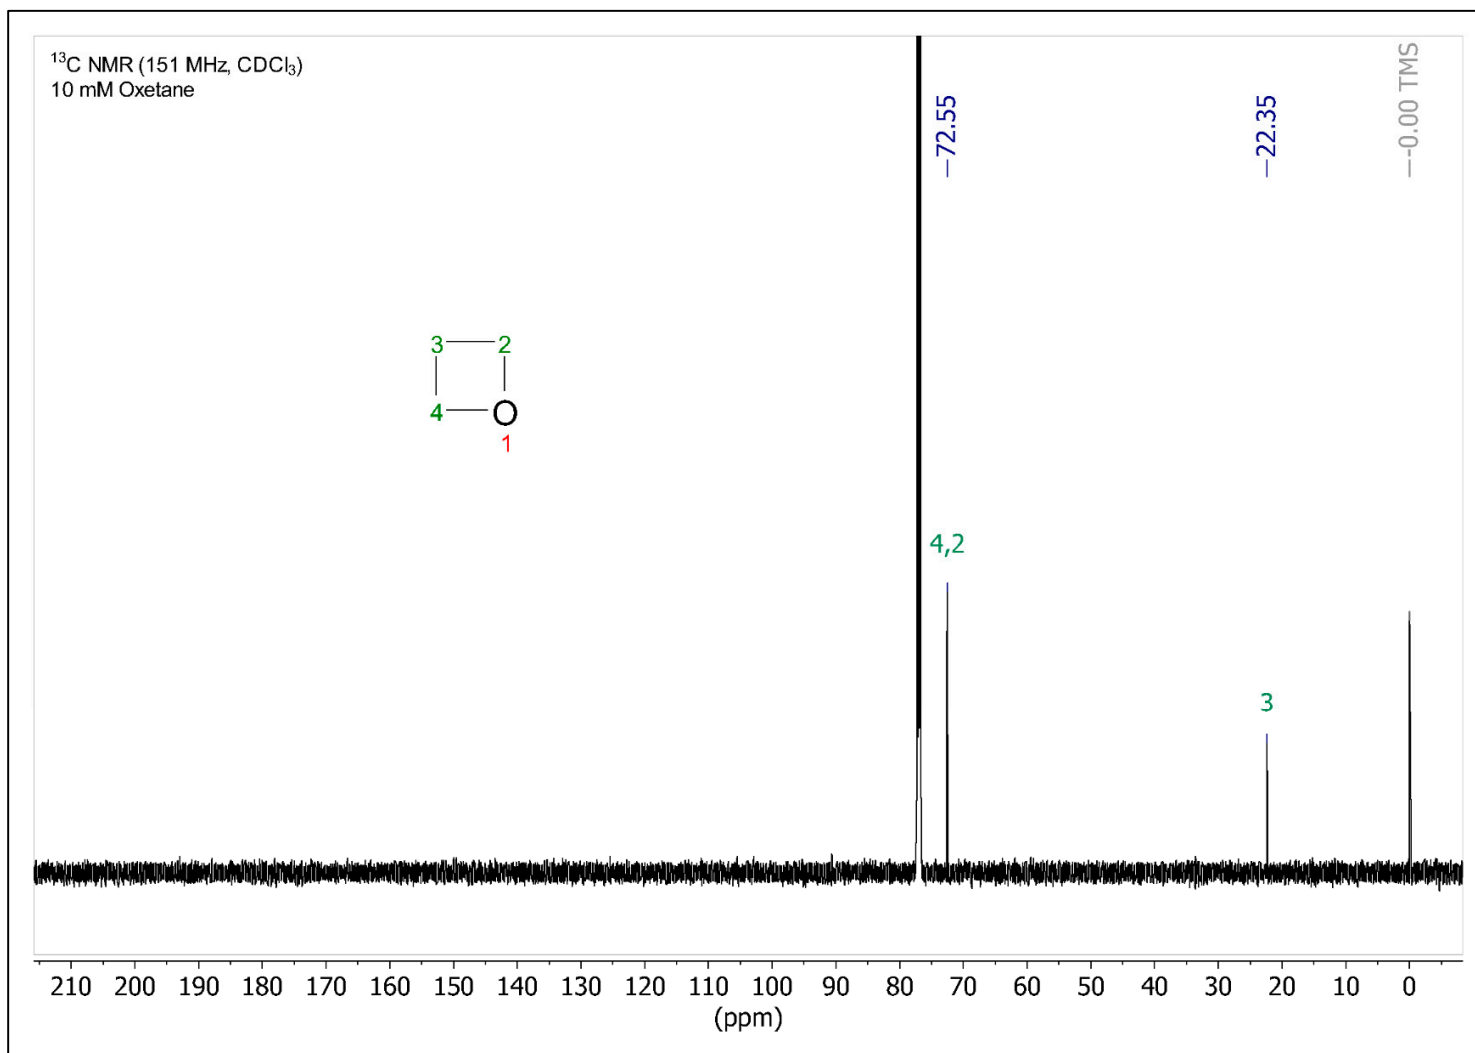

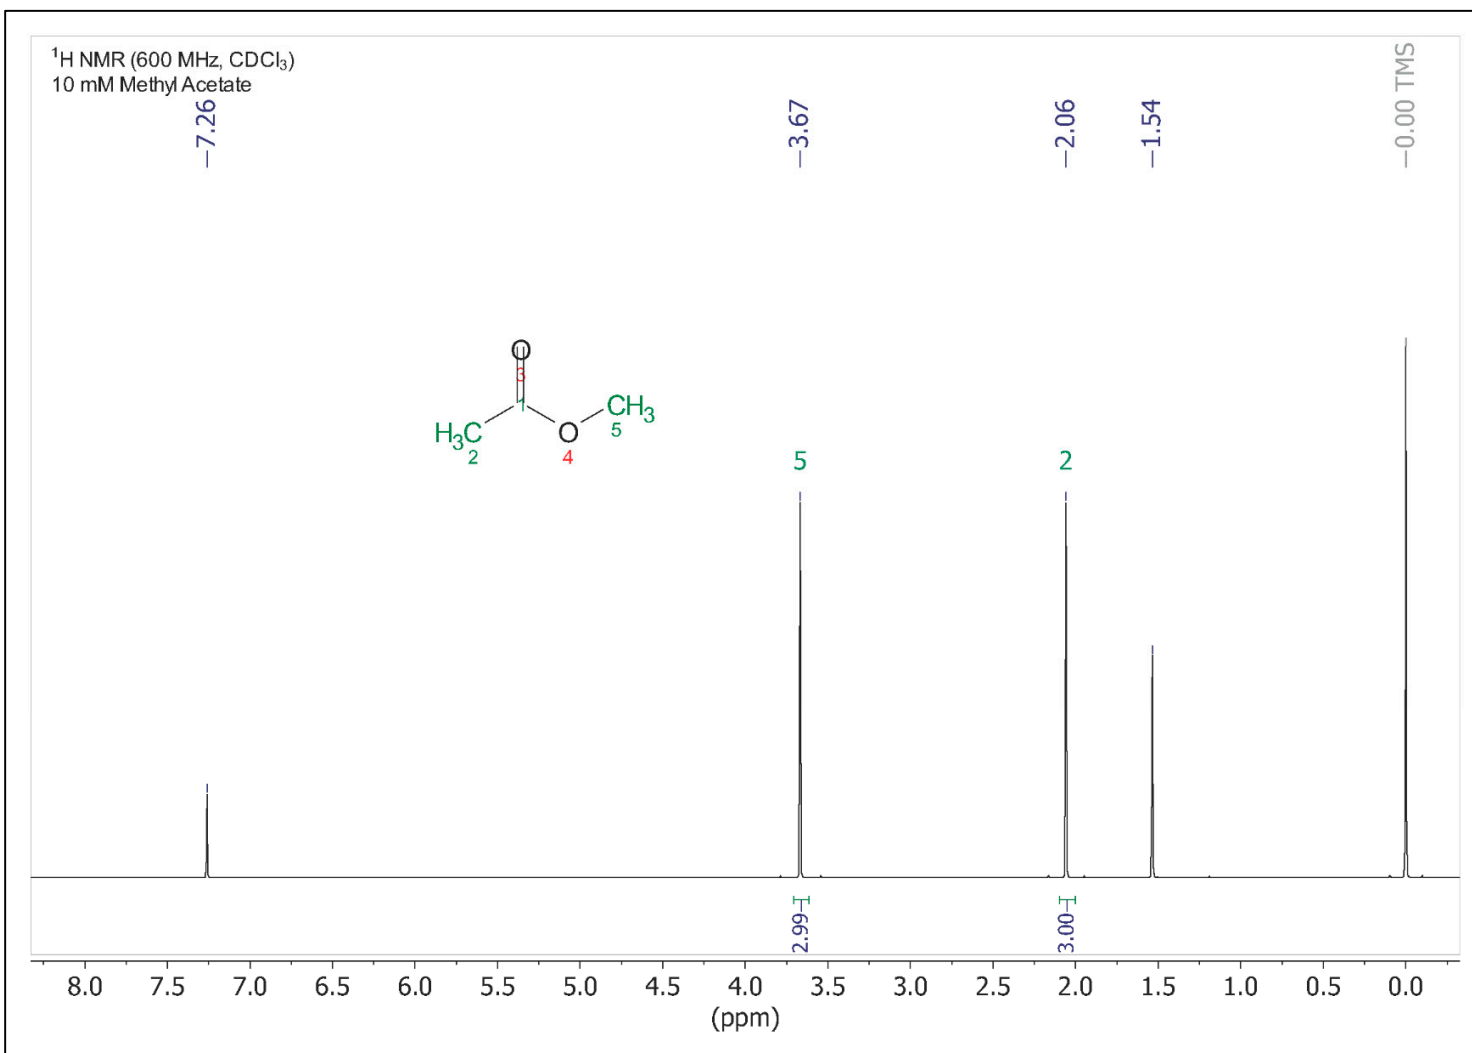

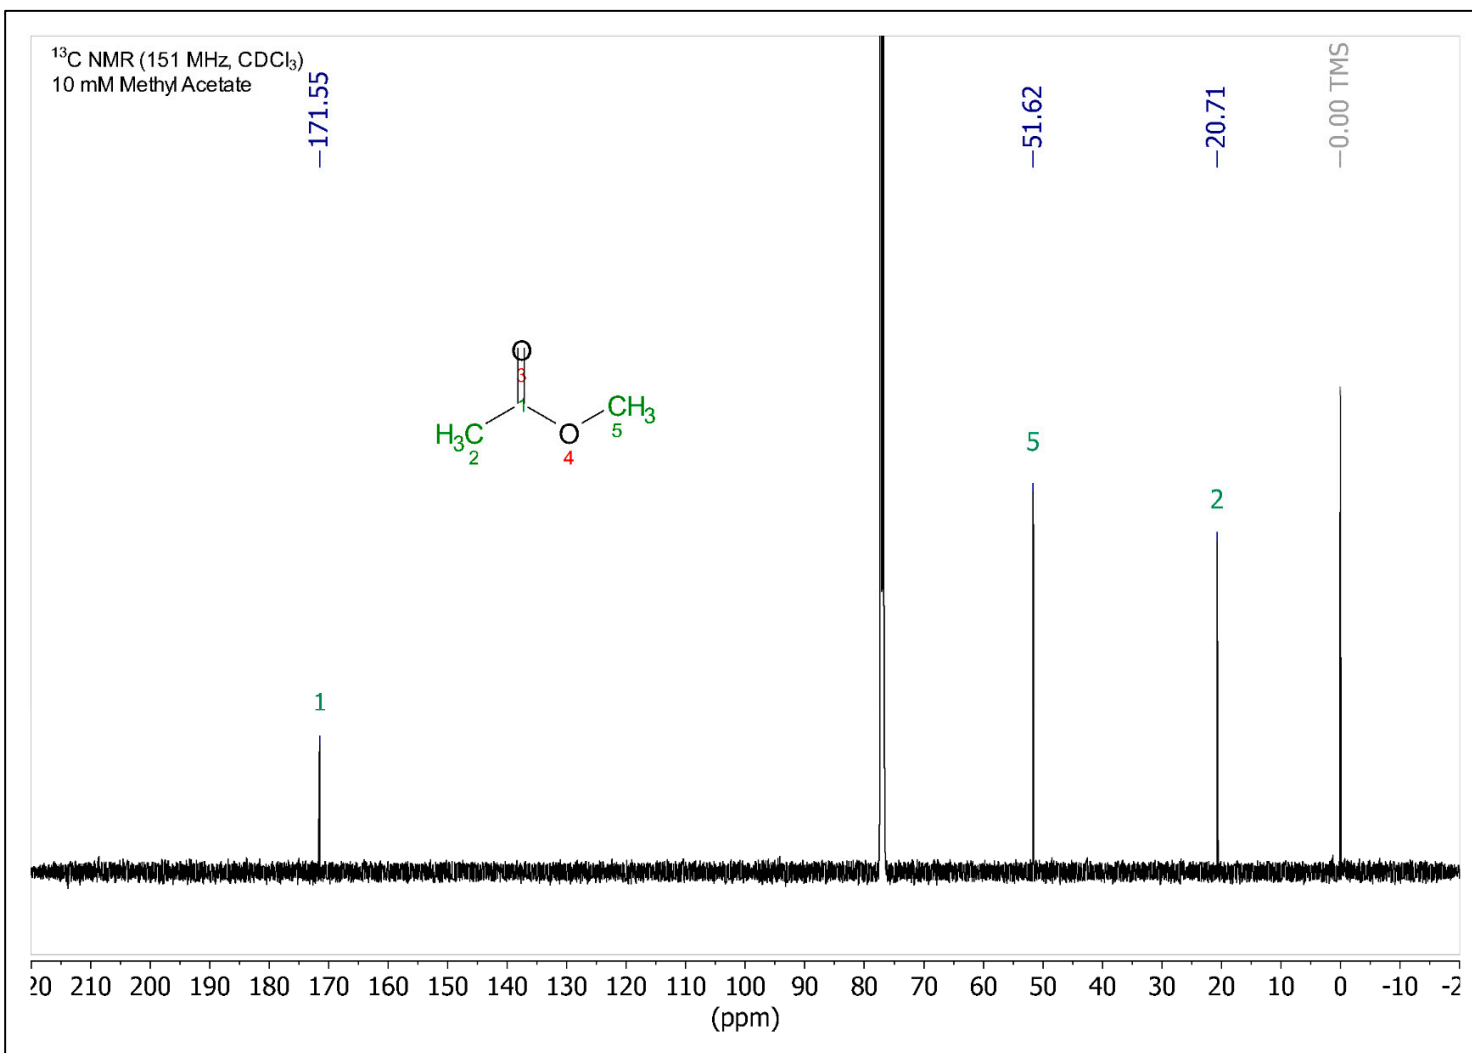

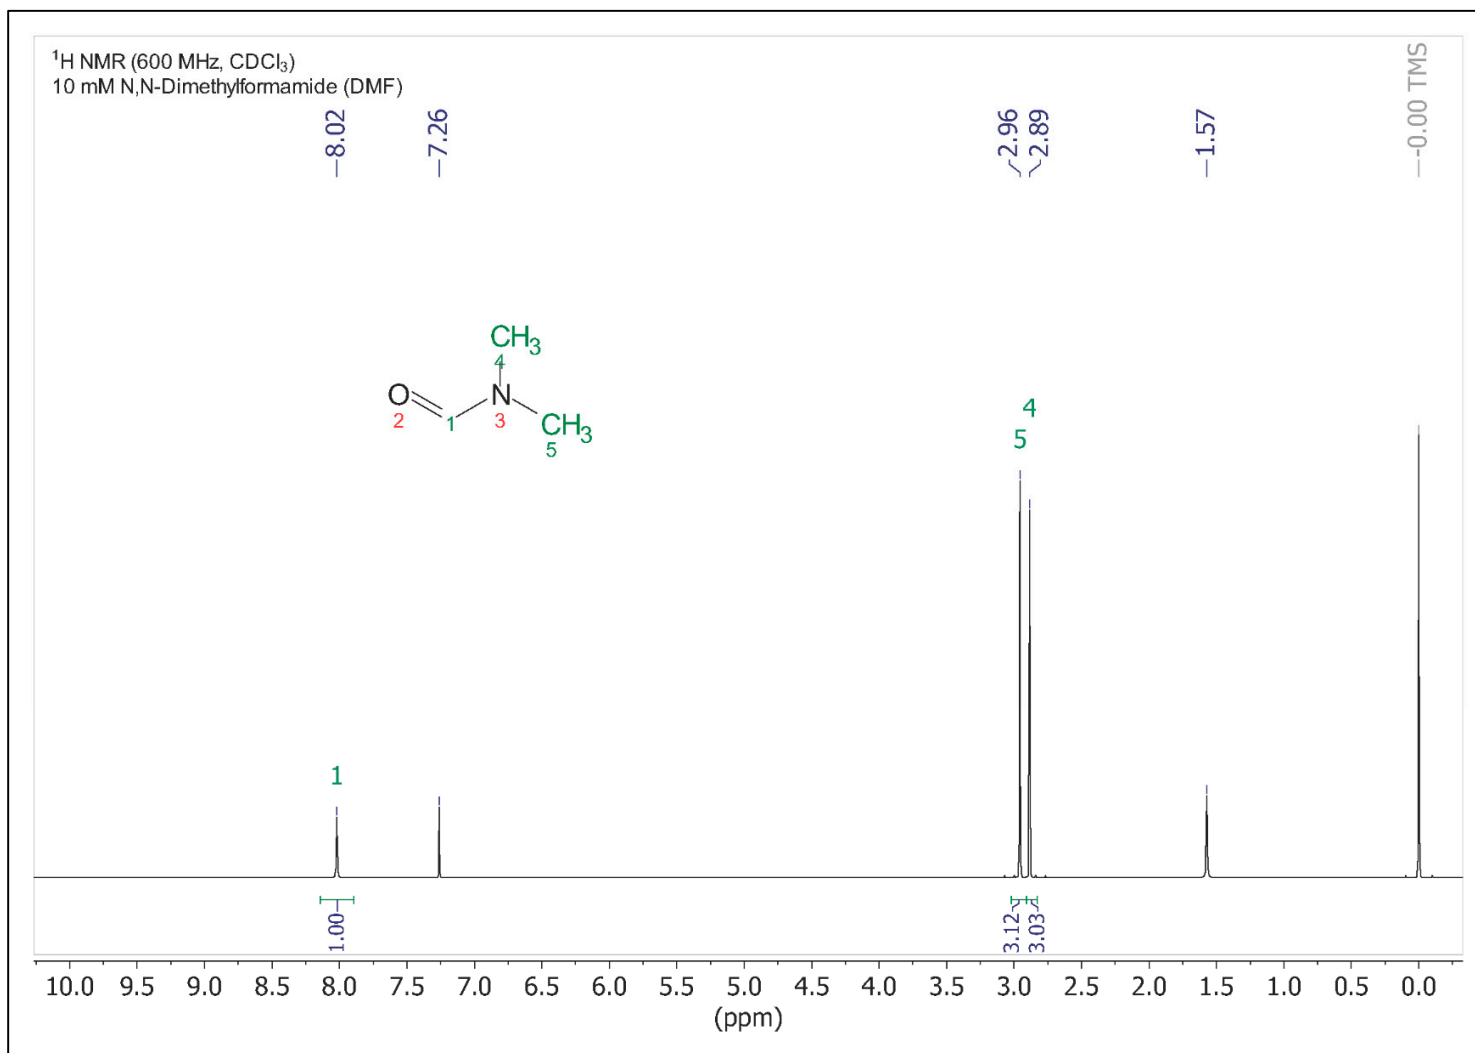

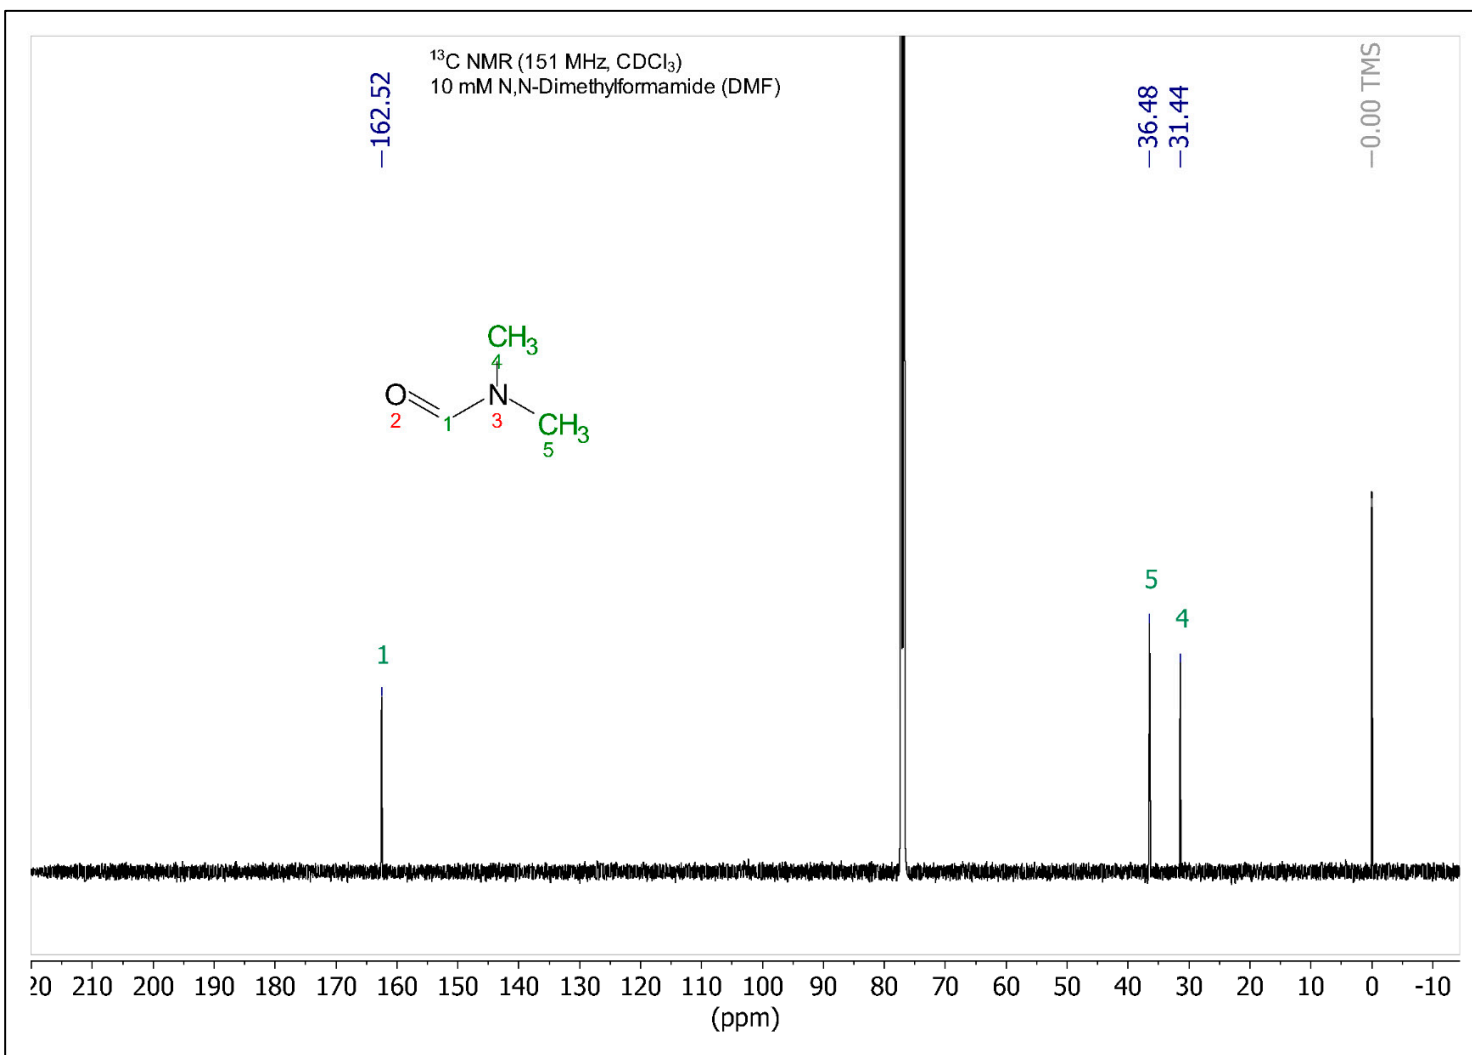



<sup>1</sup>H selective NOESY NMR (600 MHz, CDCl<sub>3</sub>)  
10 mM N,N-Dimethylformamide (DMF)

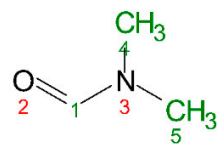

<sup>1</sup>H reference spectrum

<sup>1</sup>H selective NOESY  
of 8.02 ppm peak

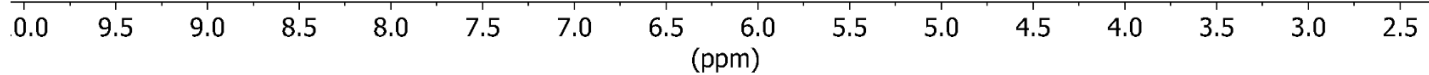

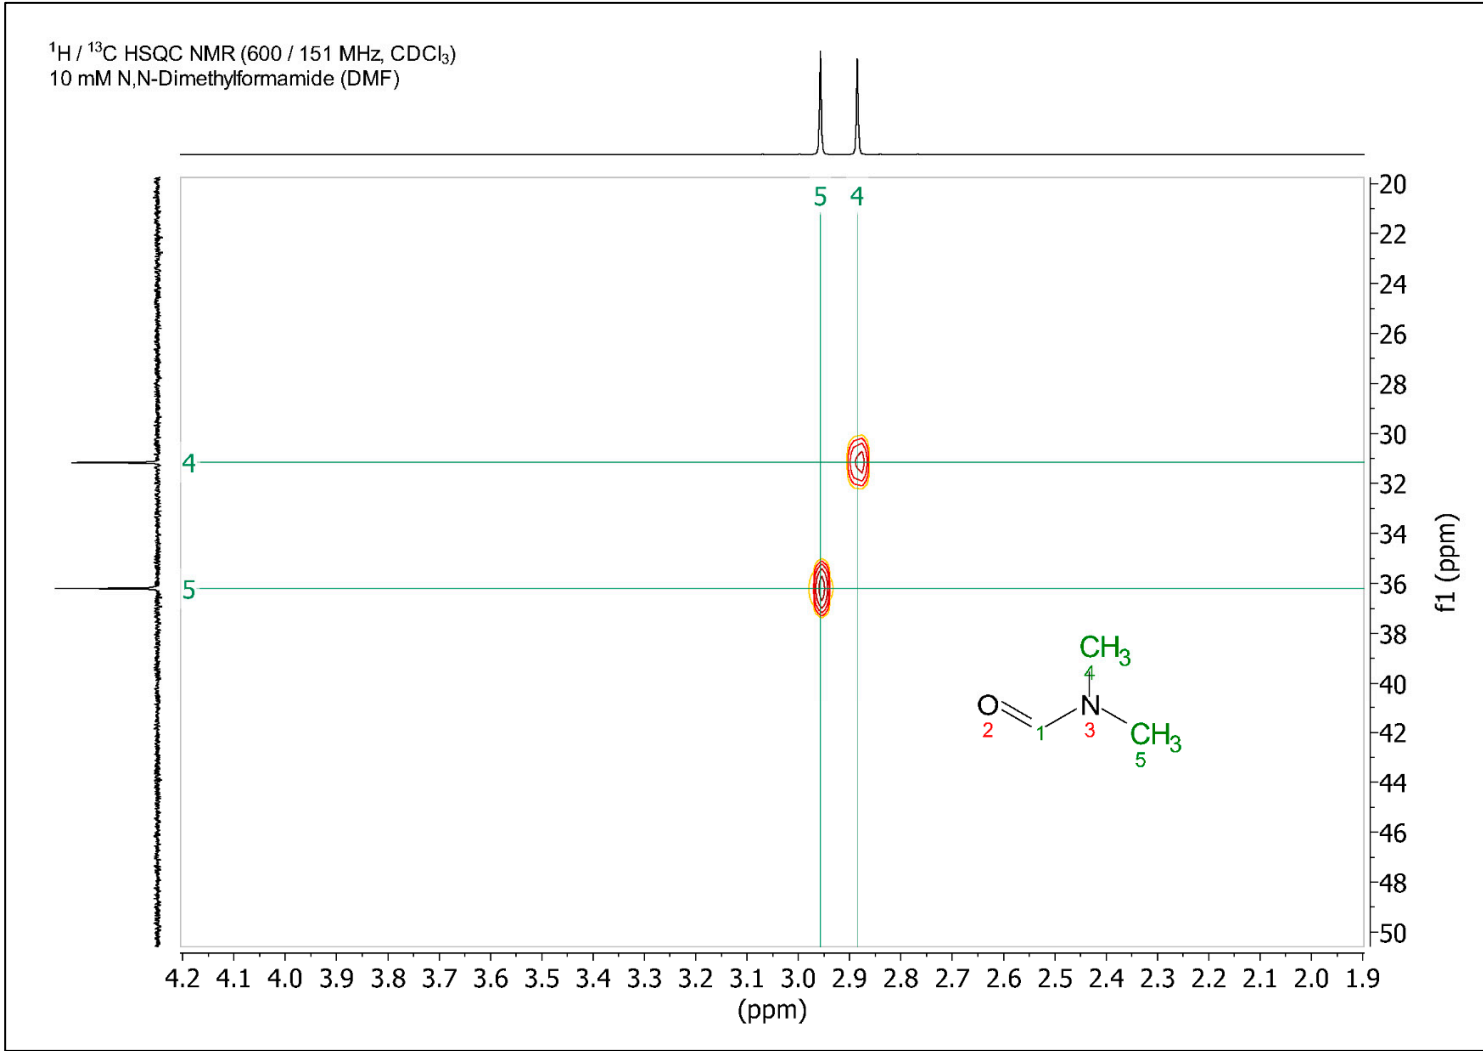

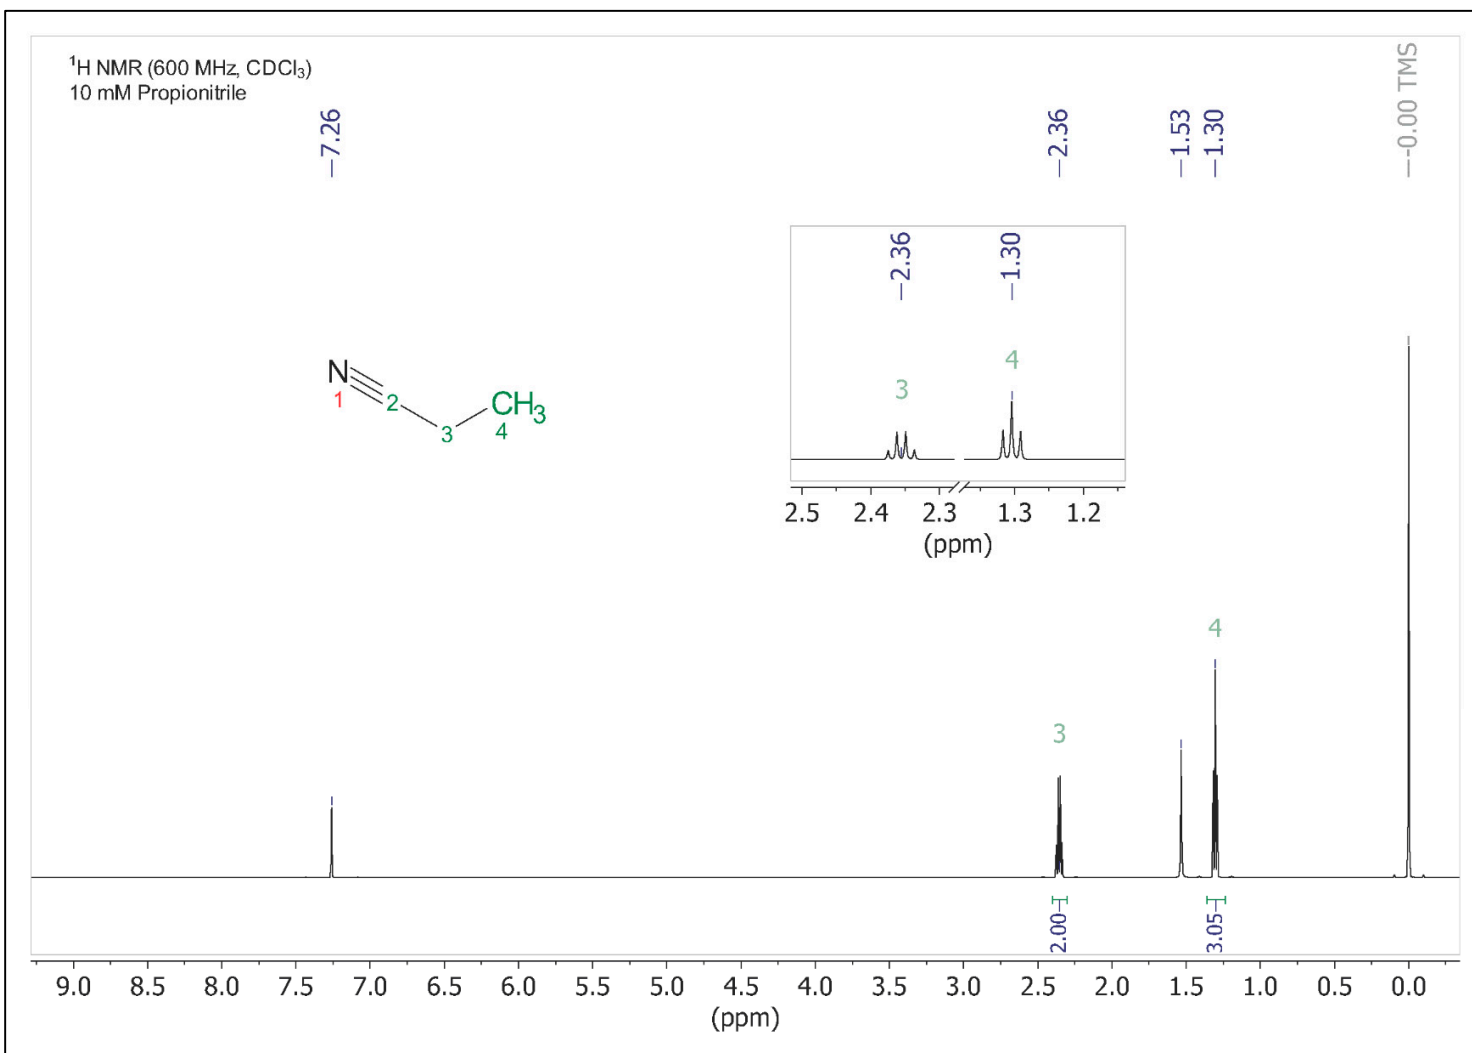

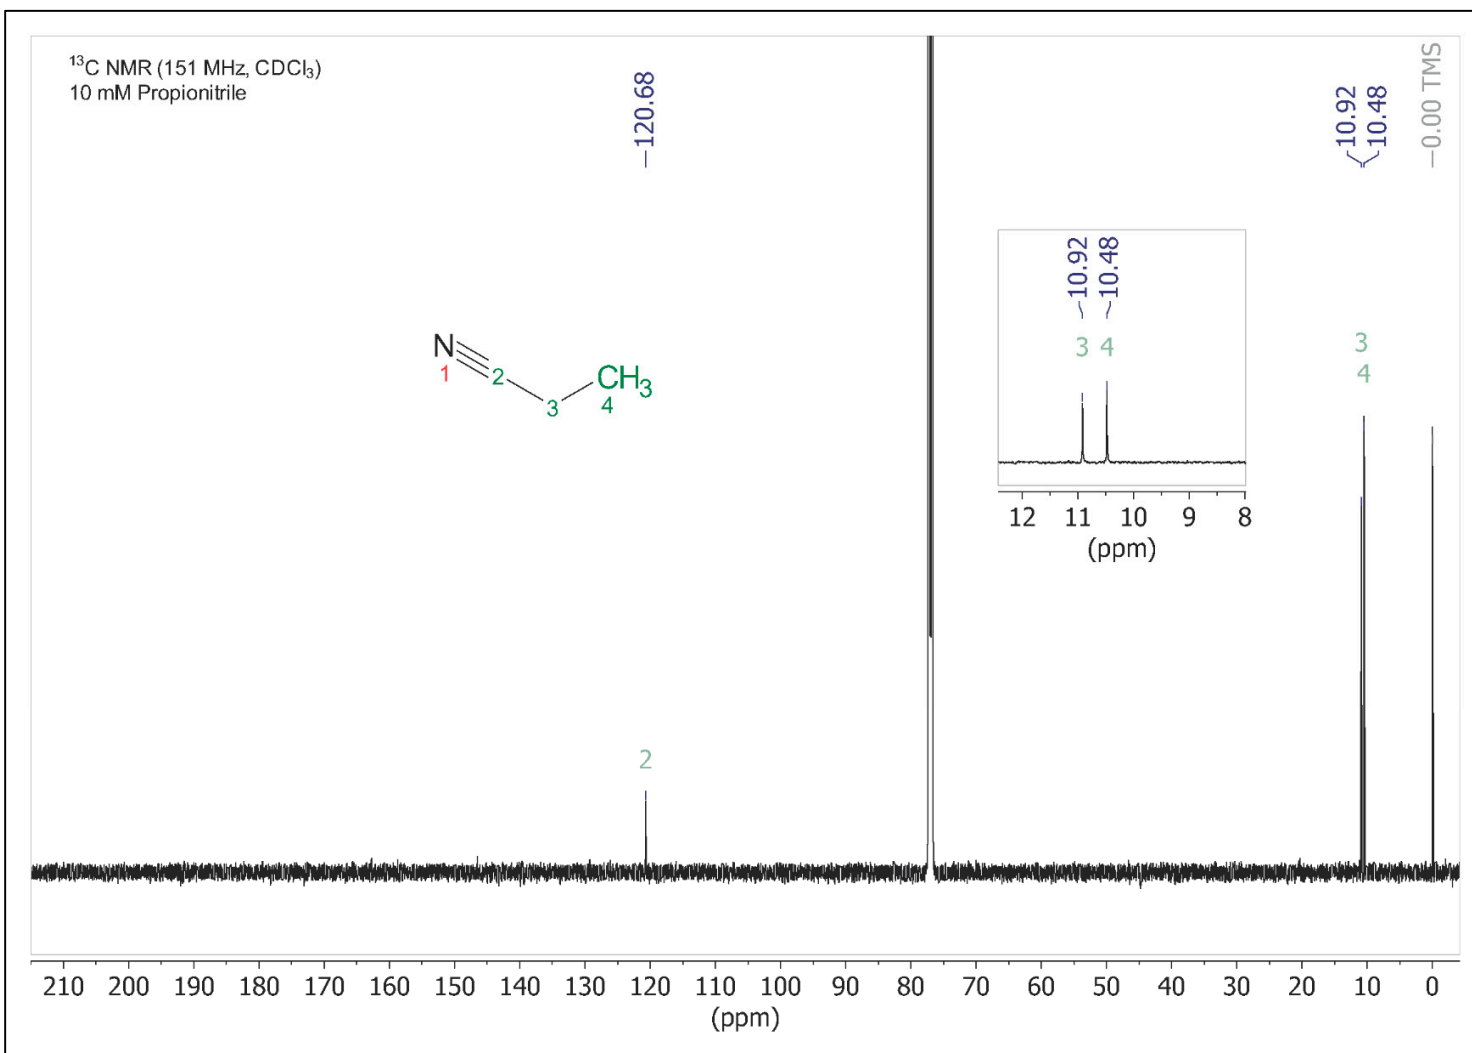

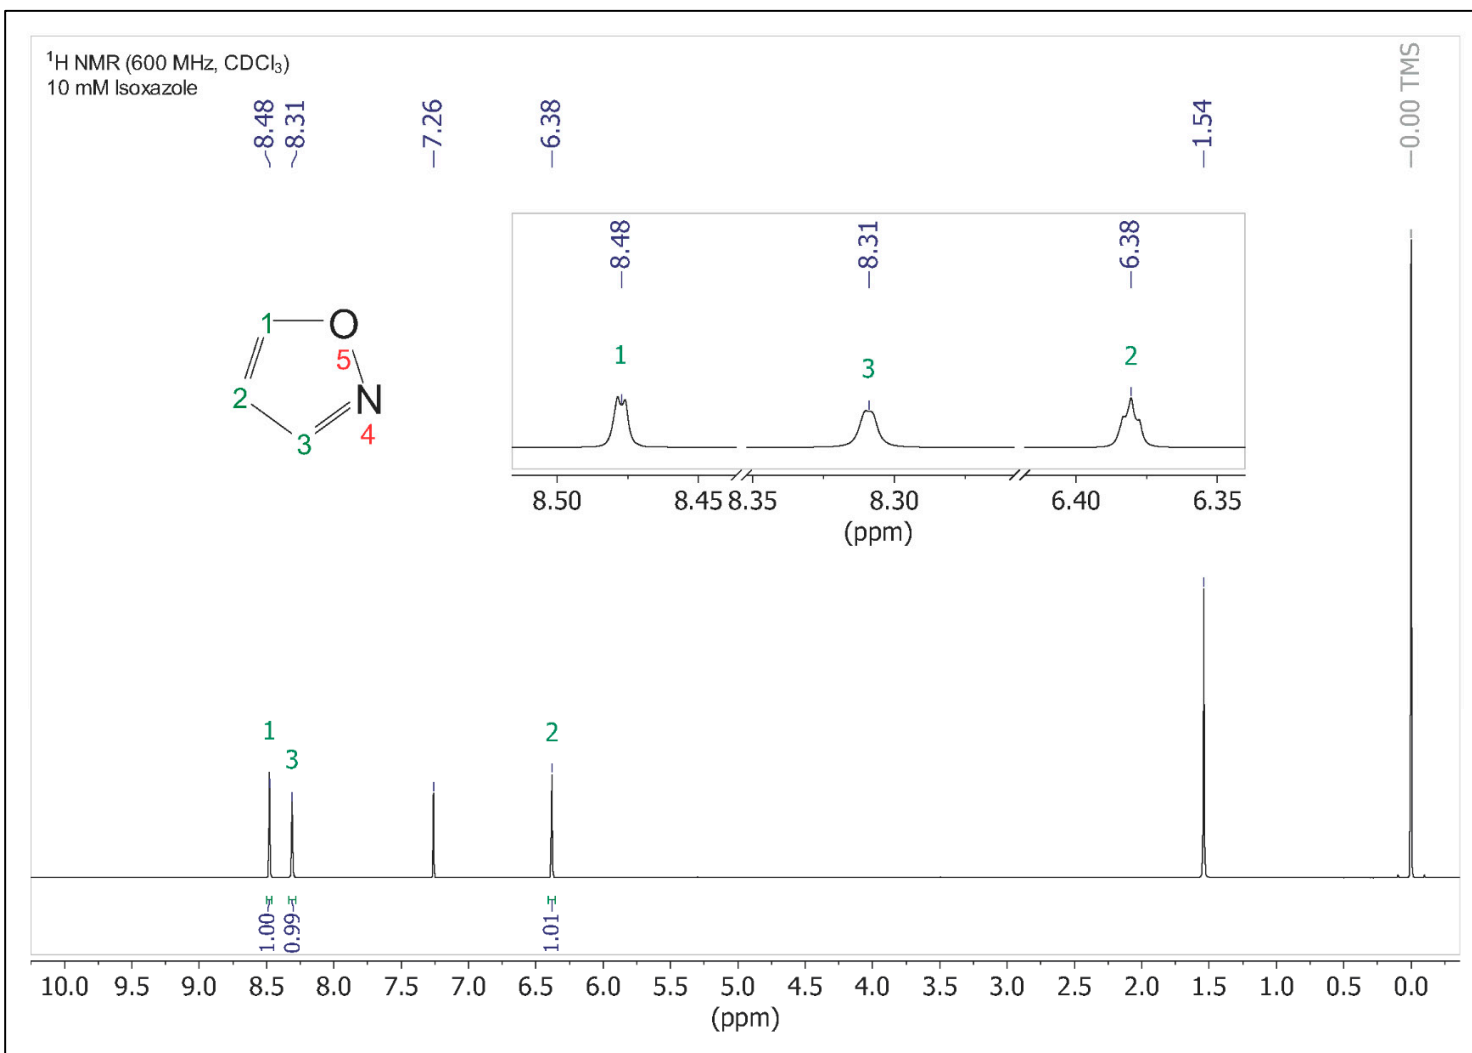

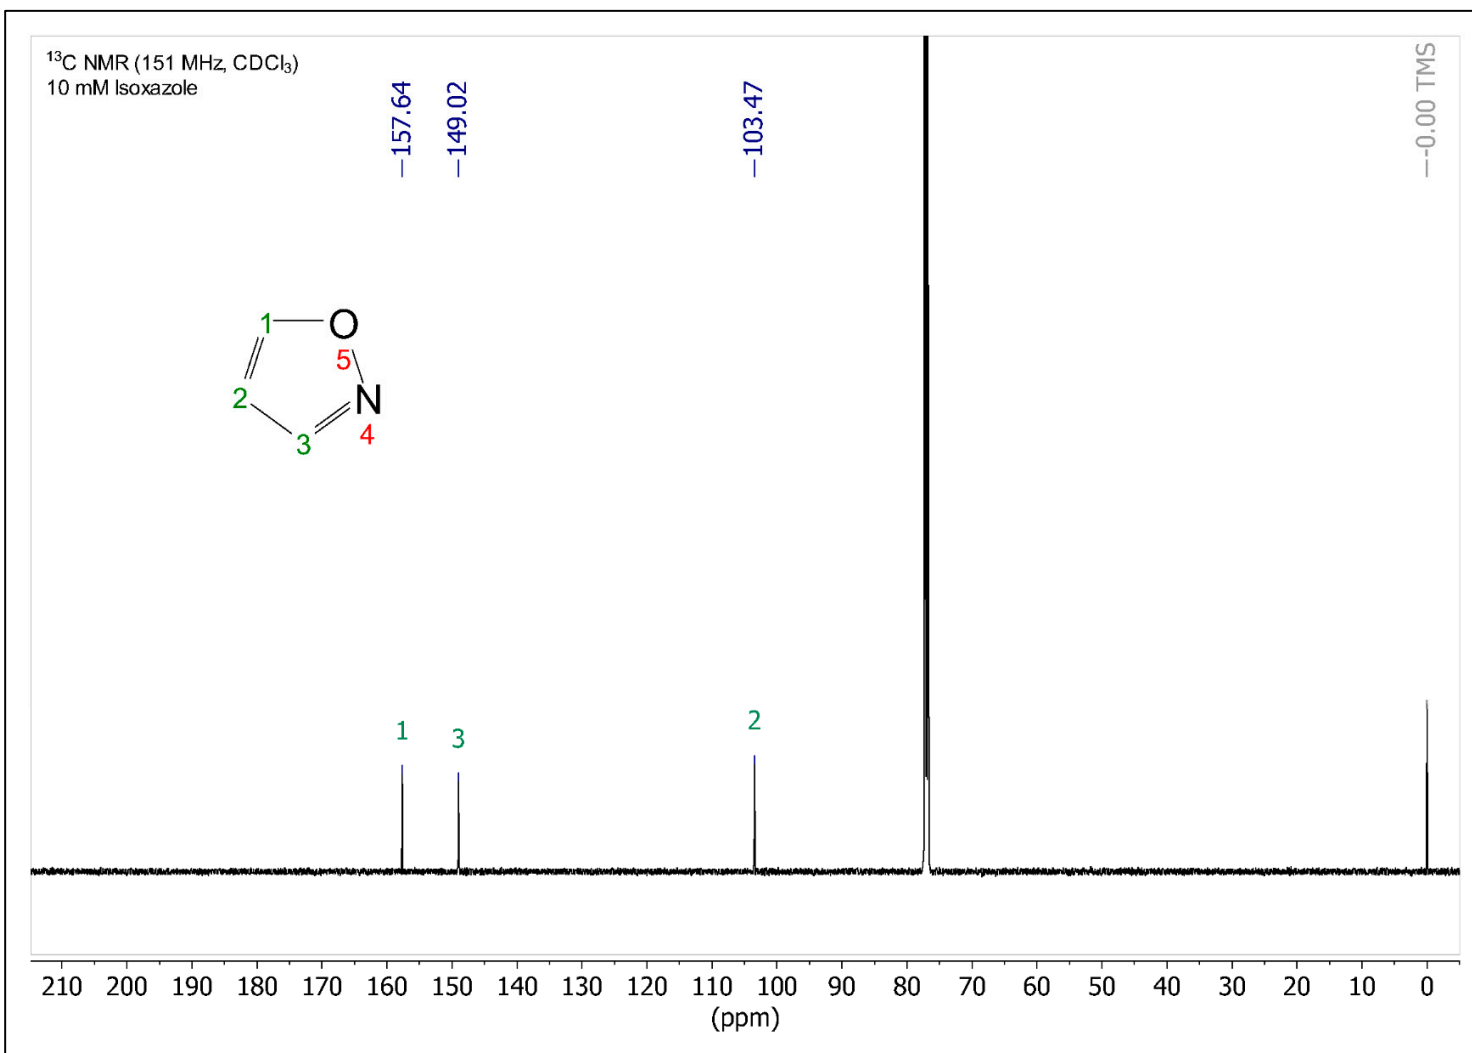

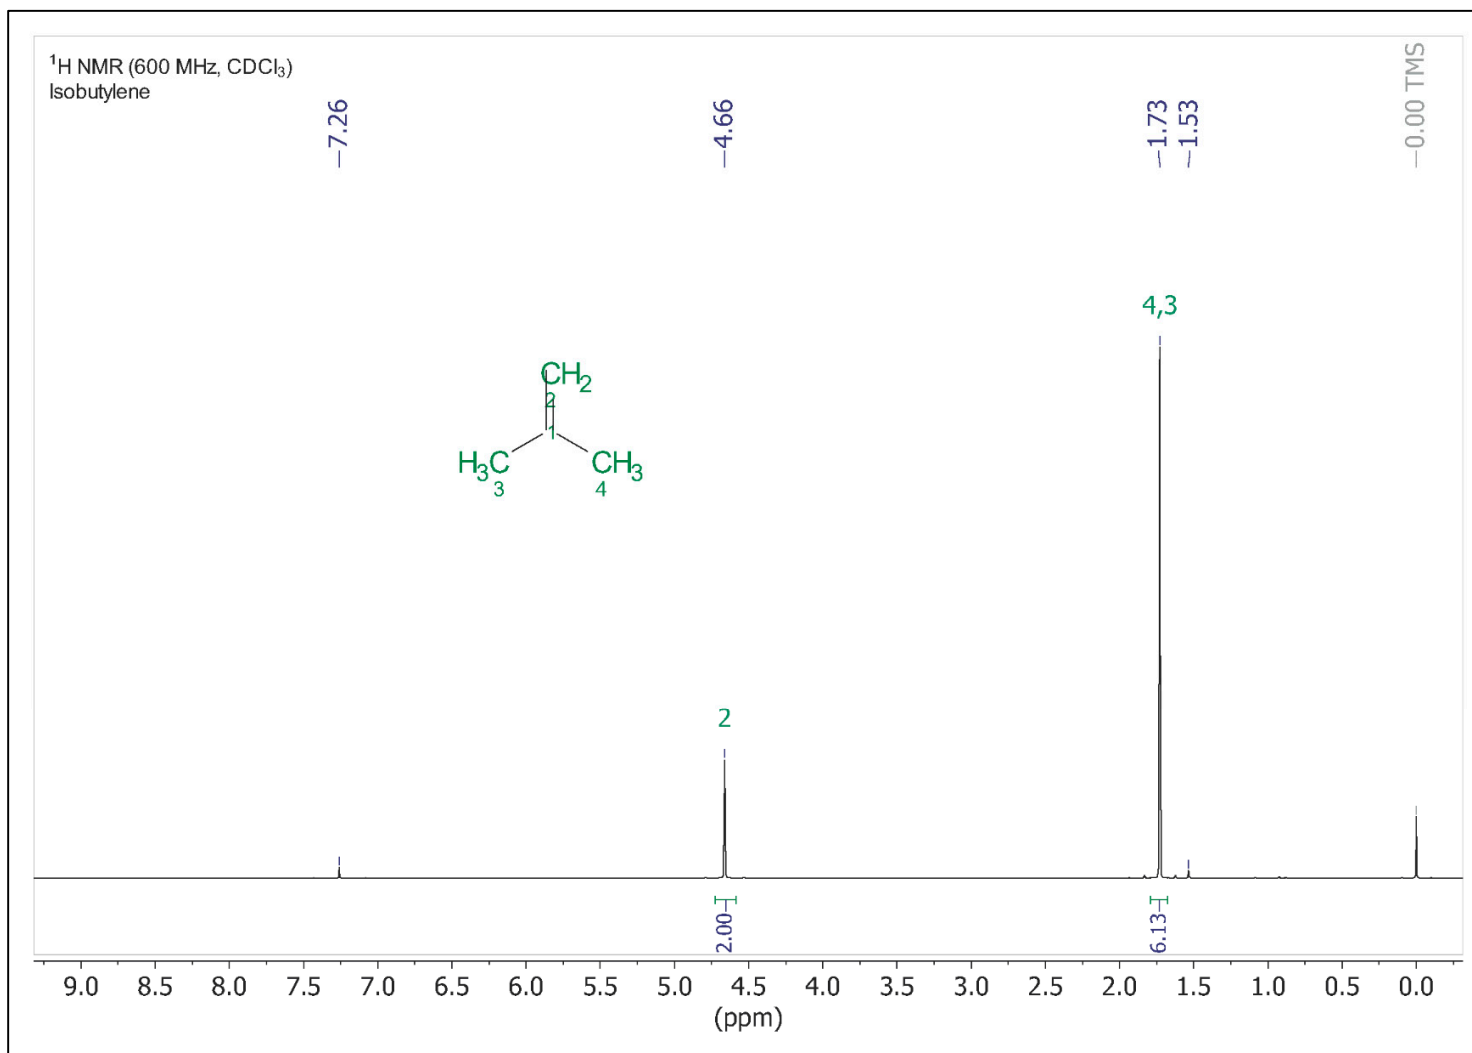

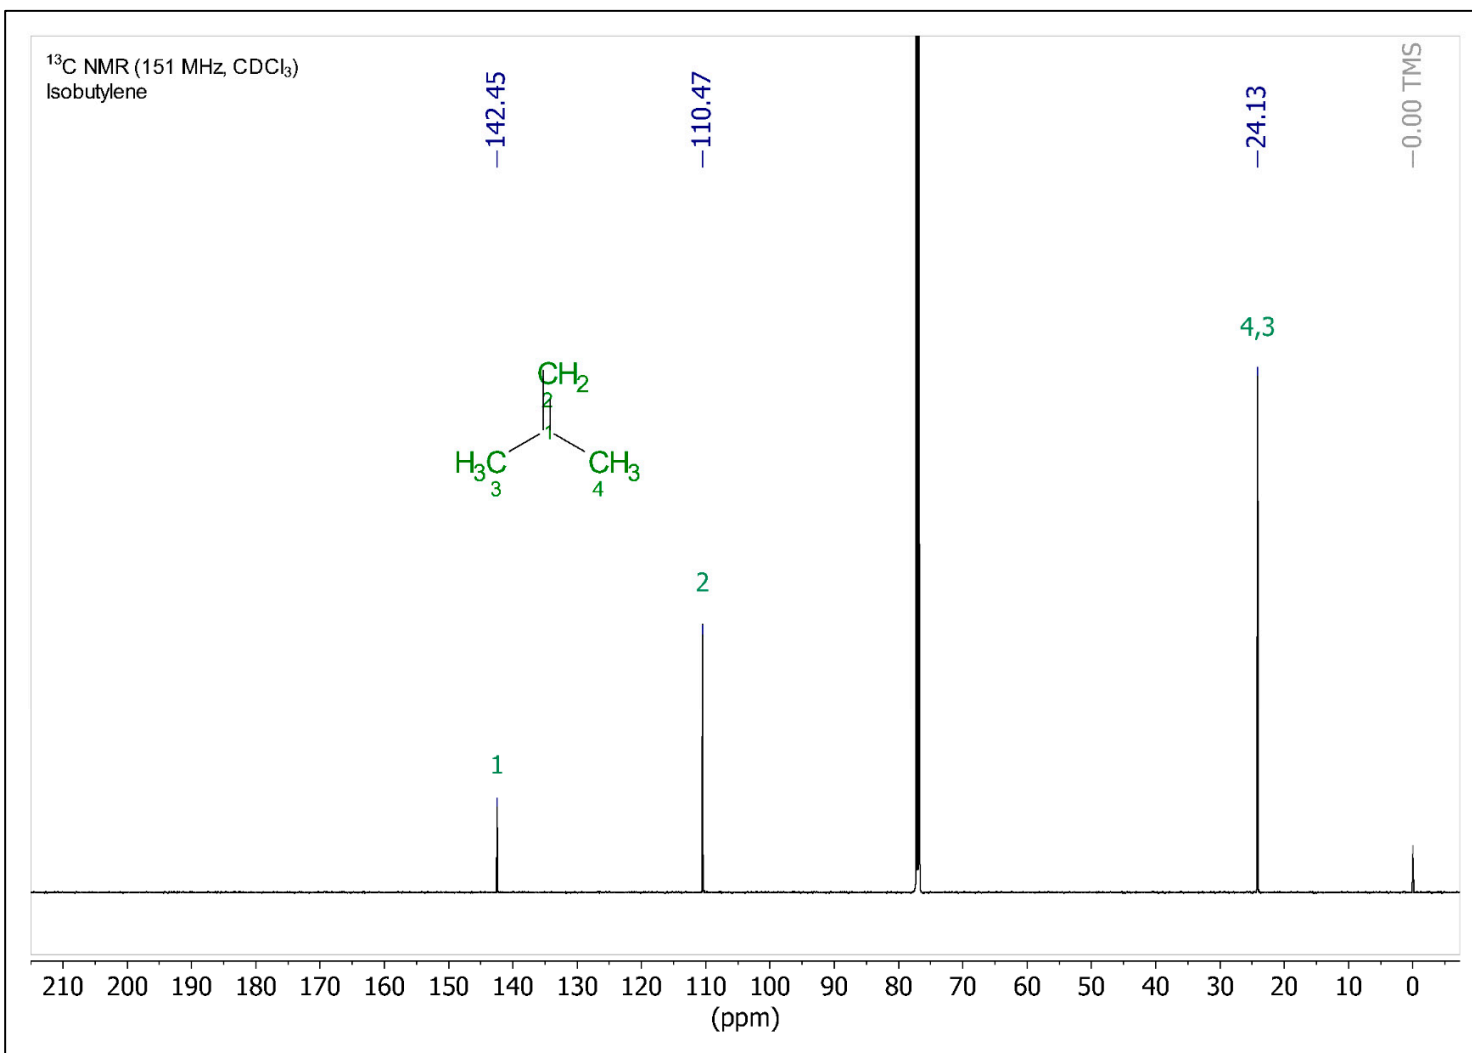



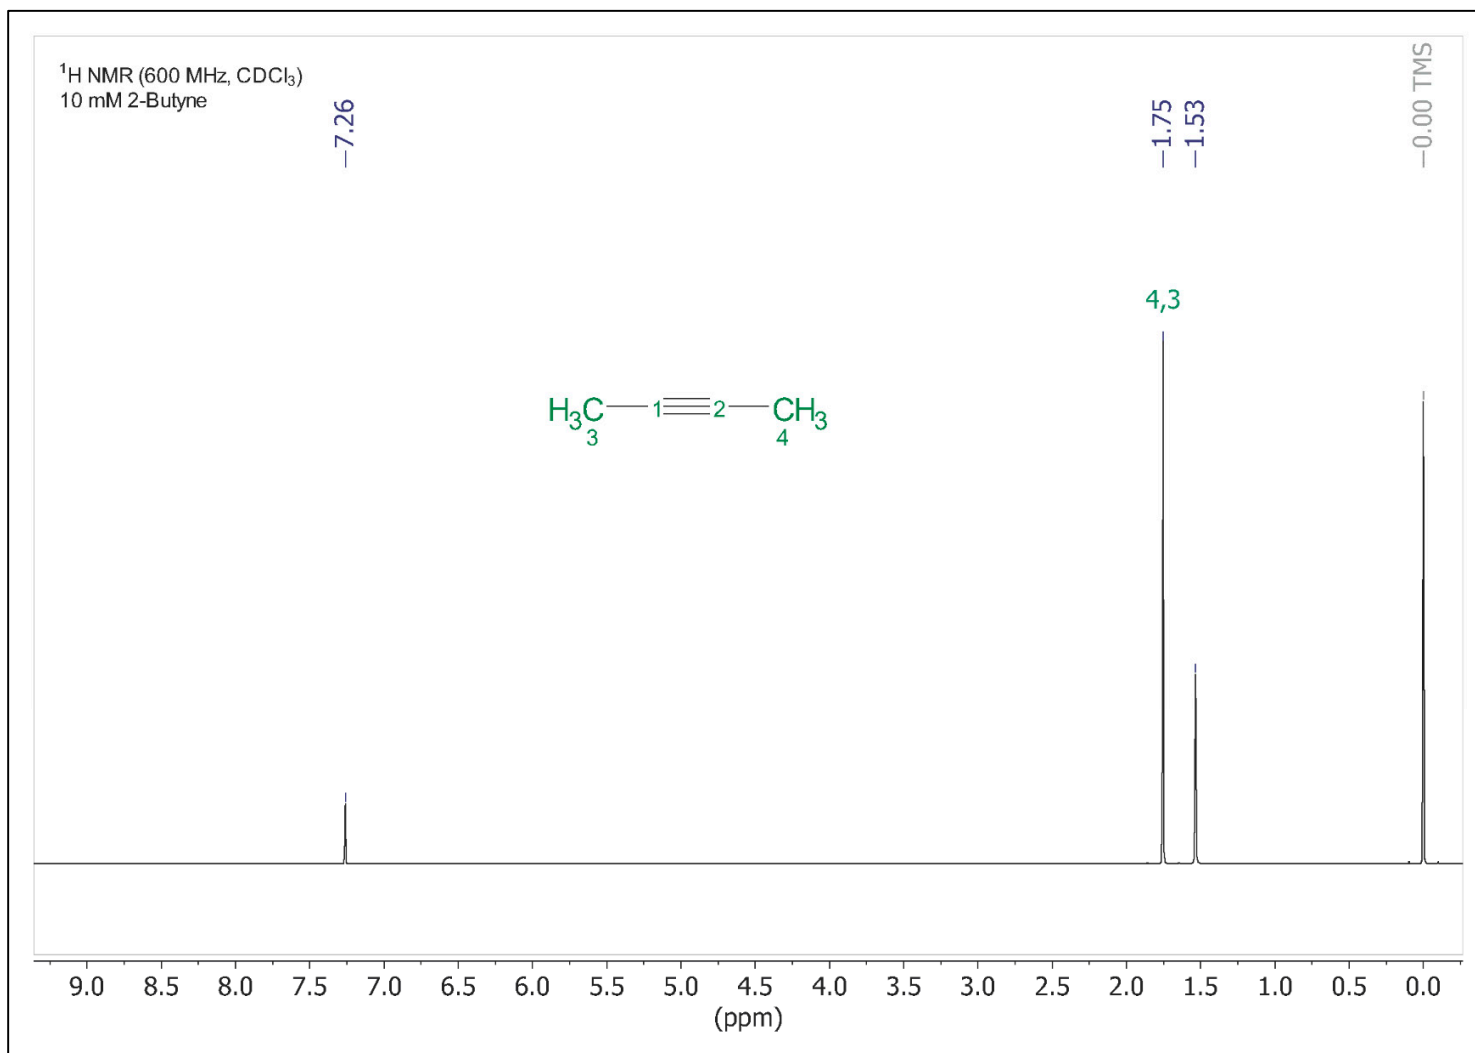

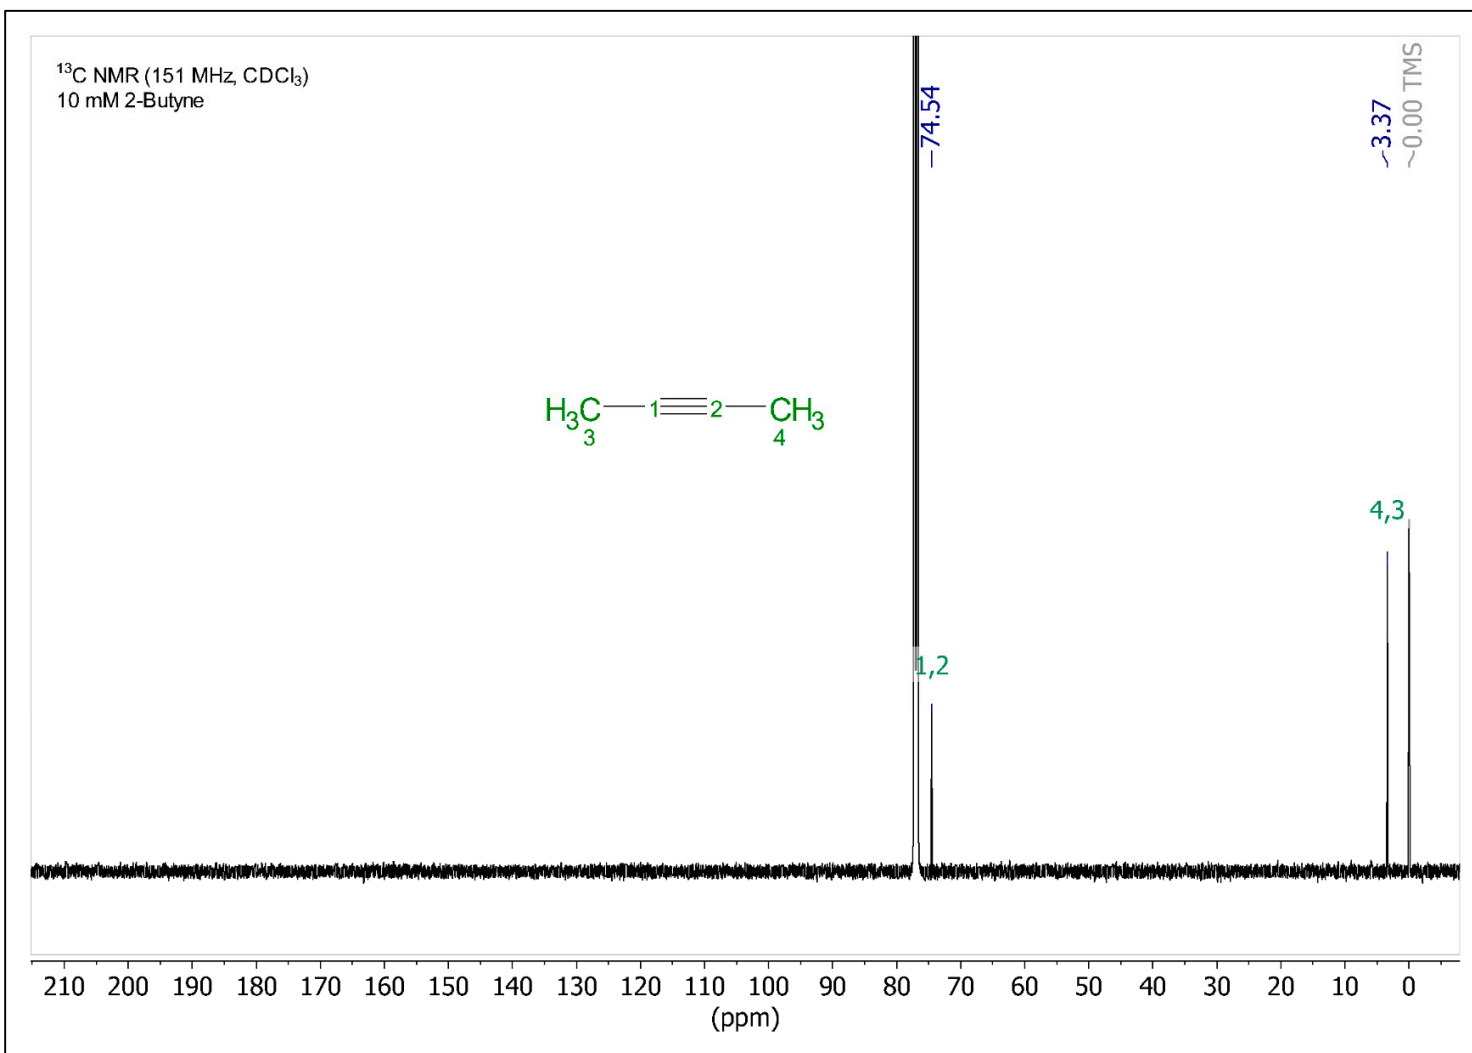

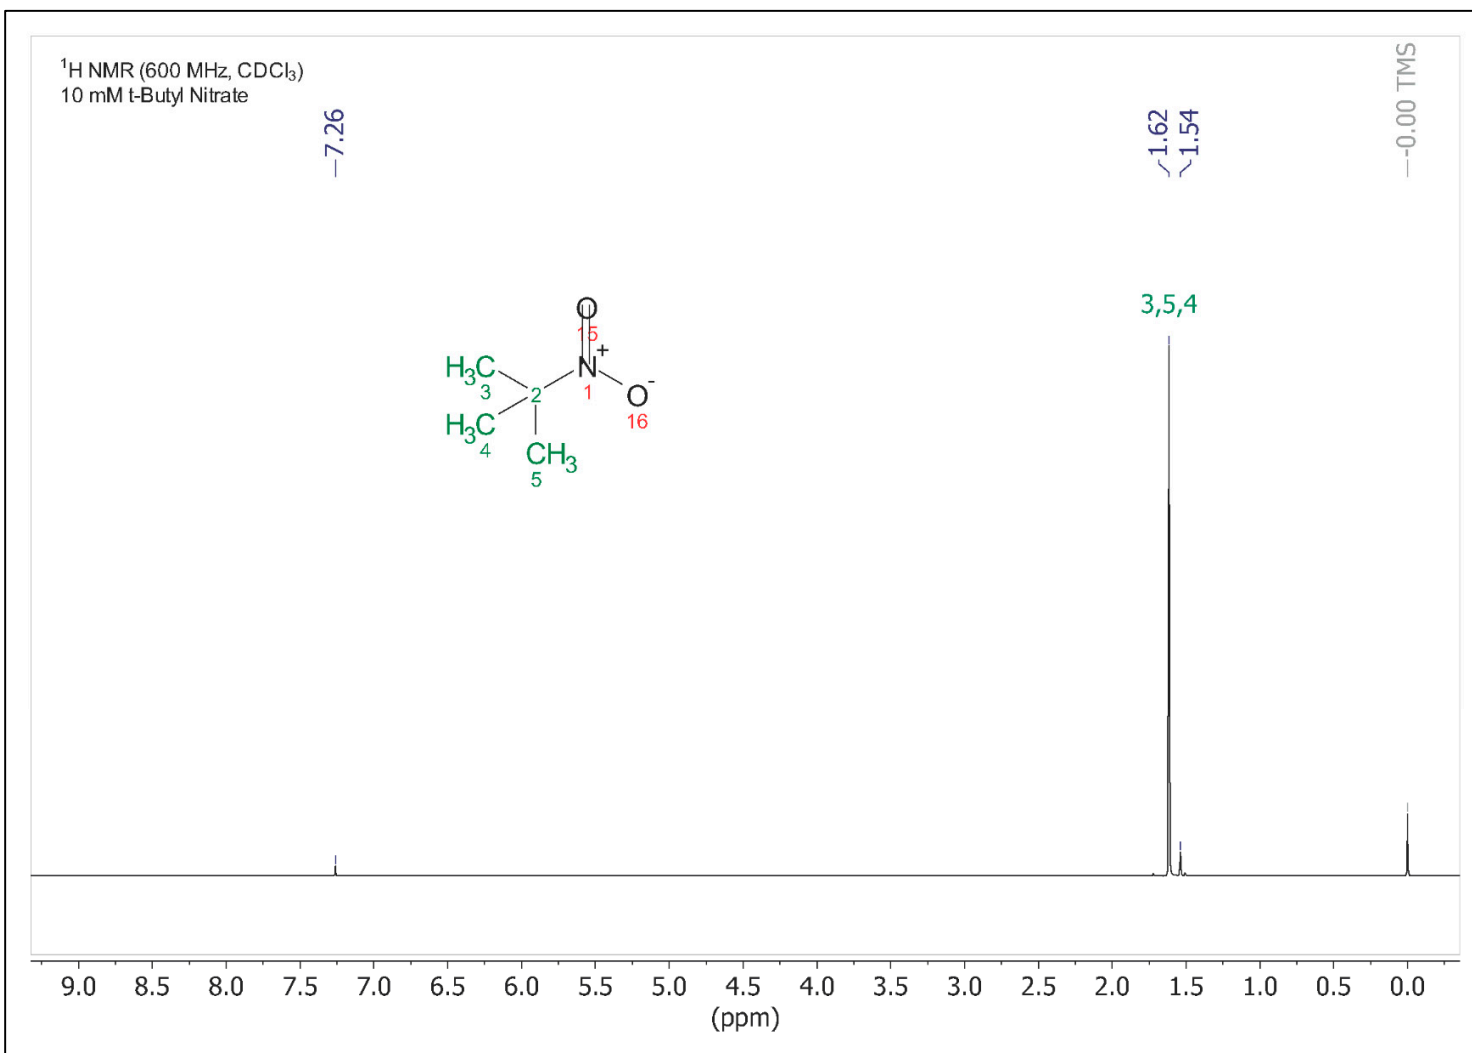

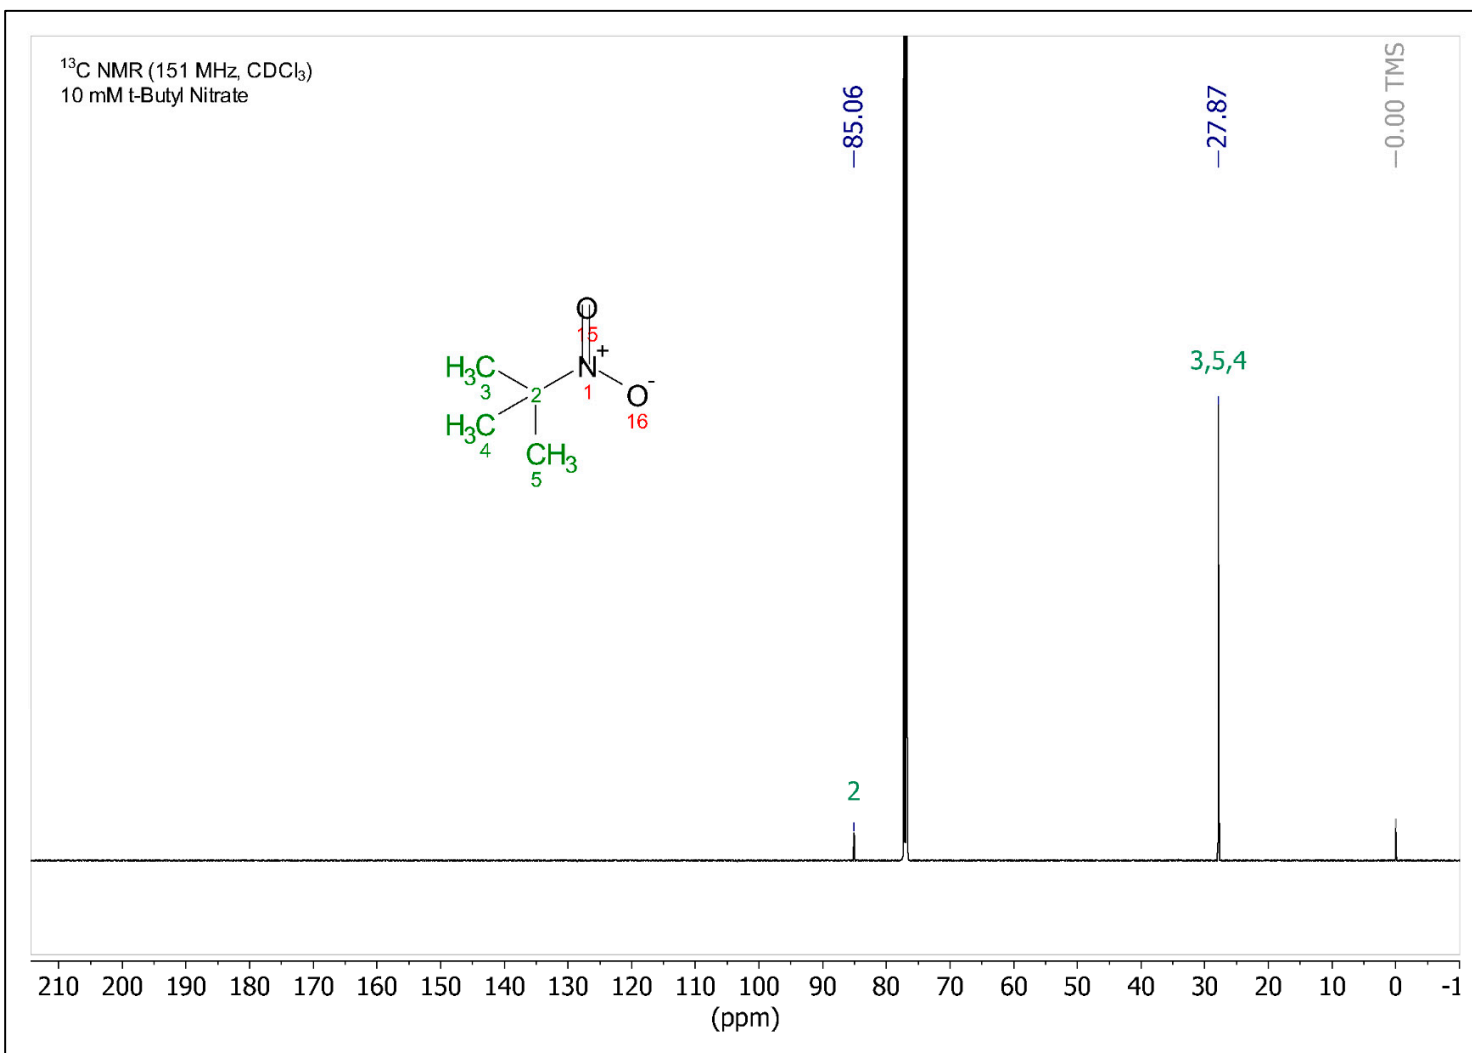

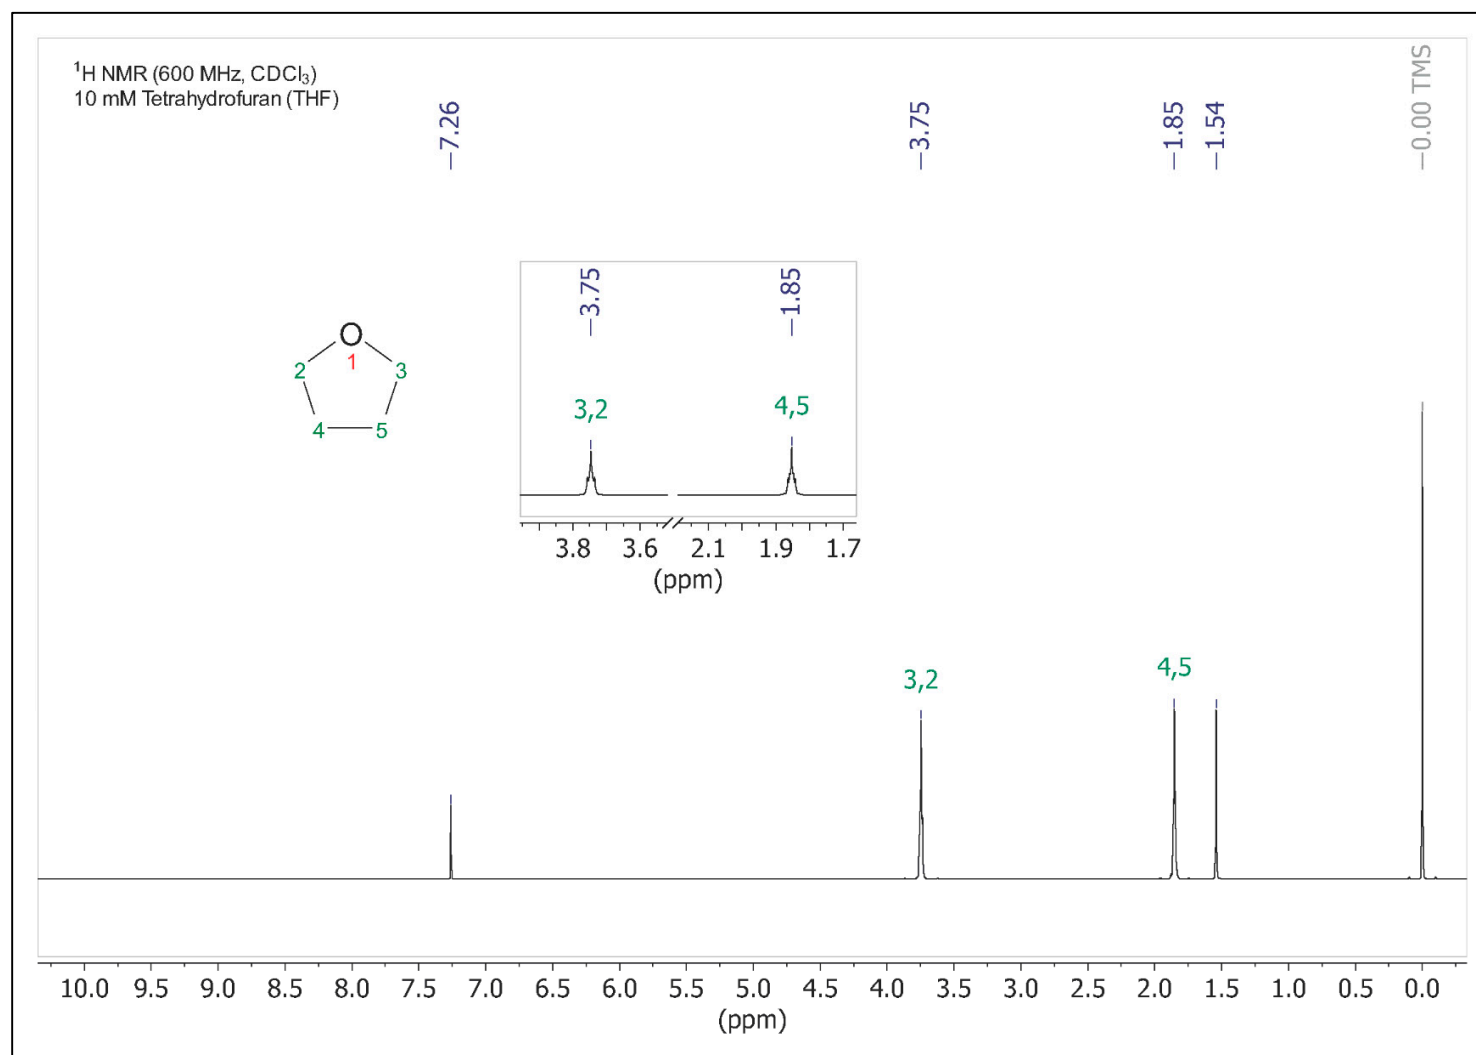

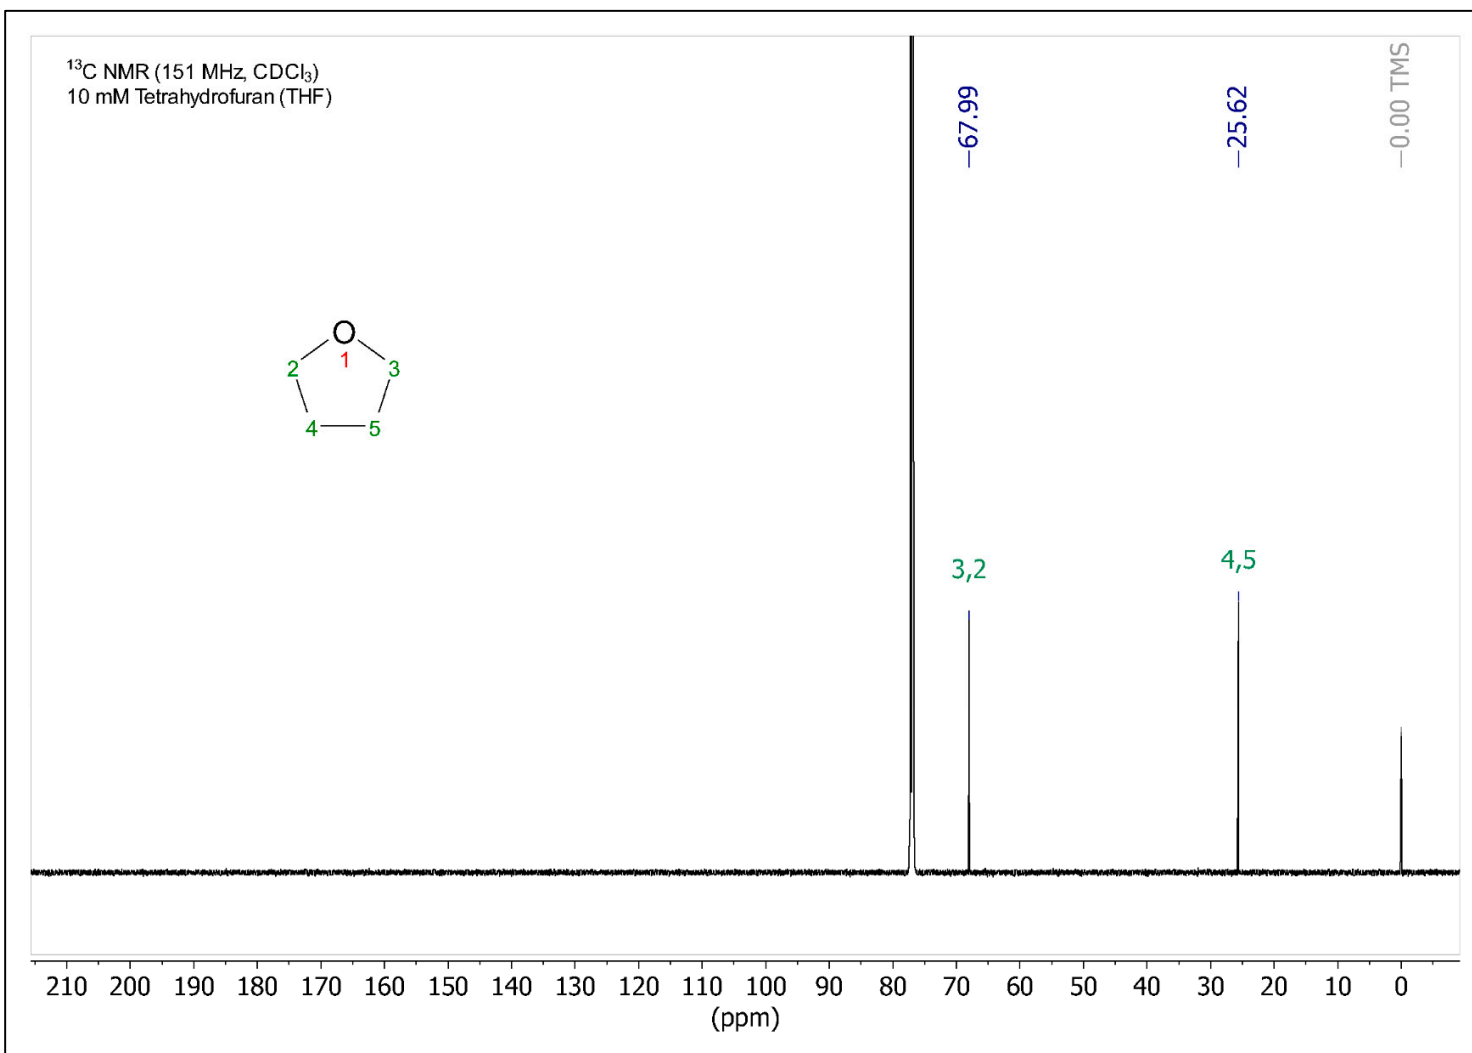

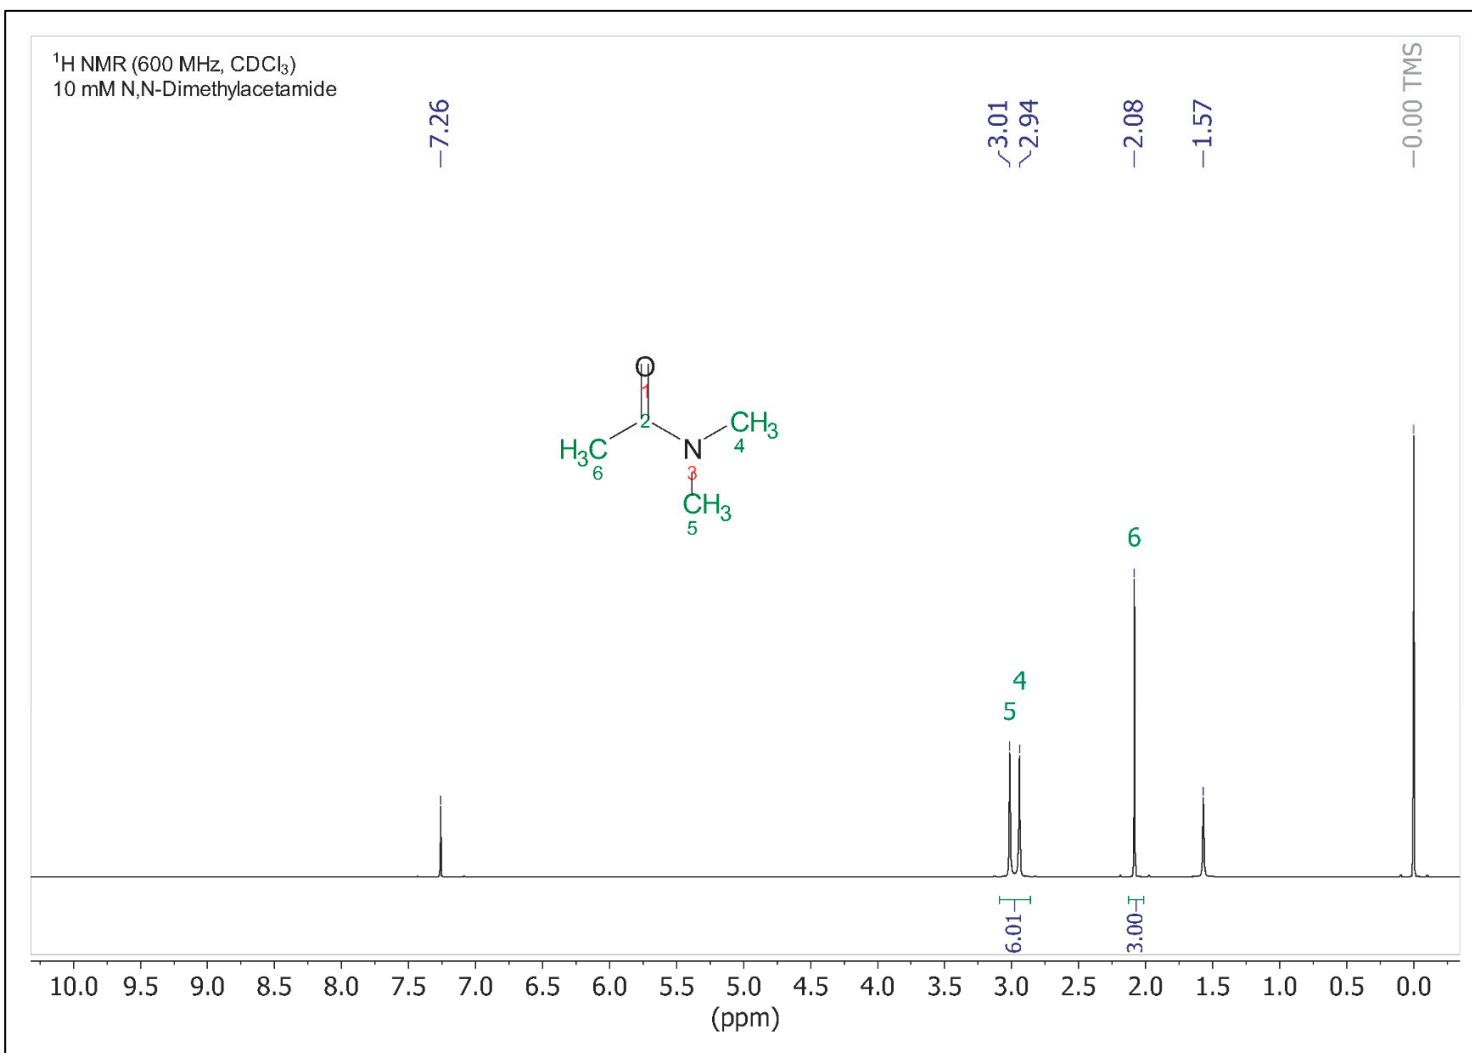

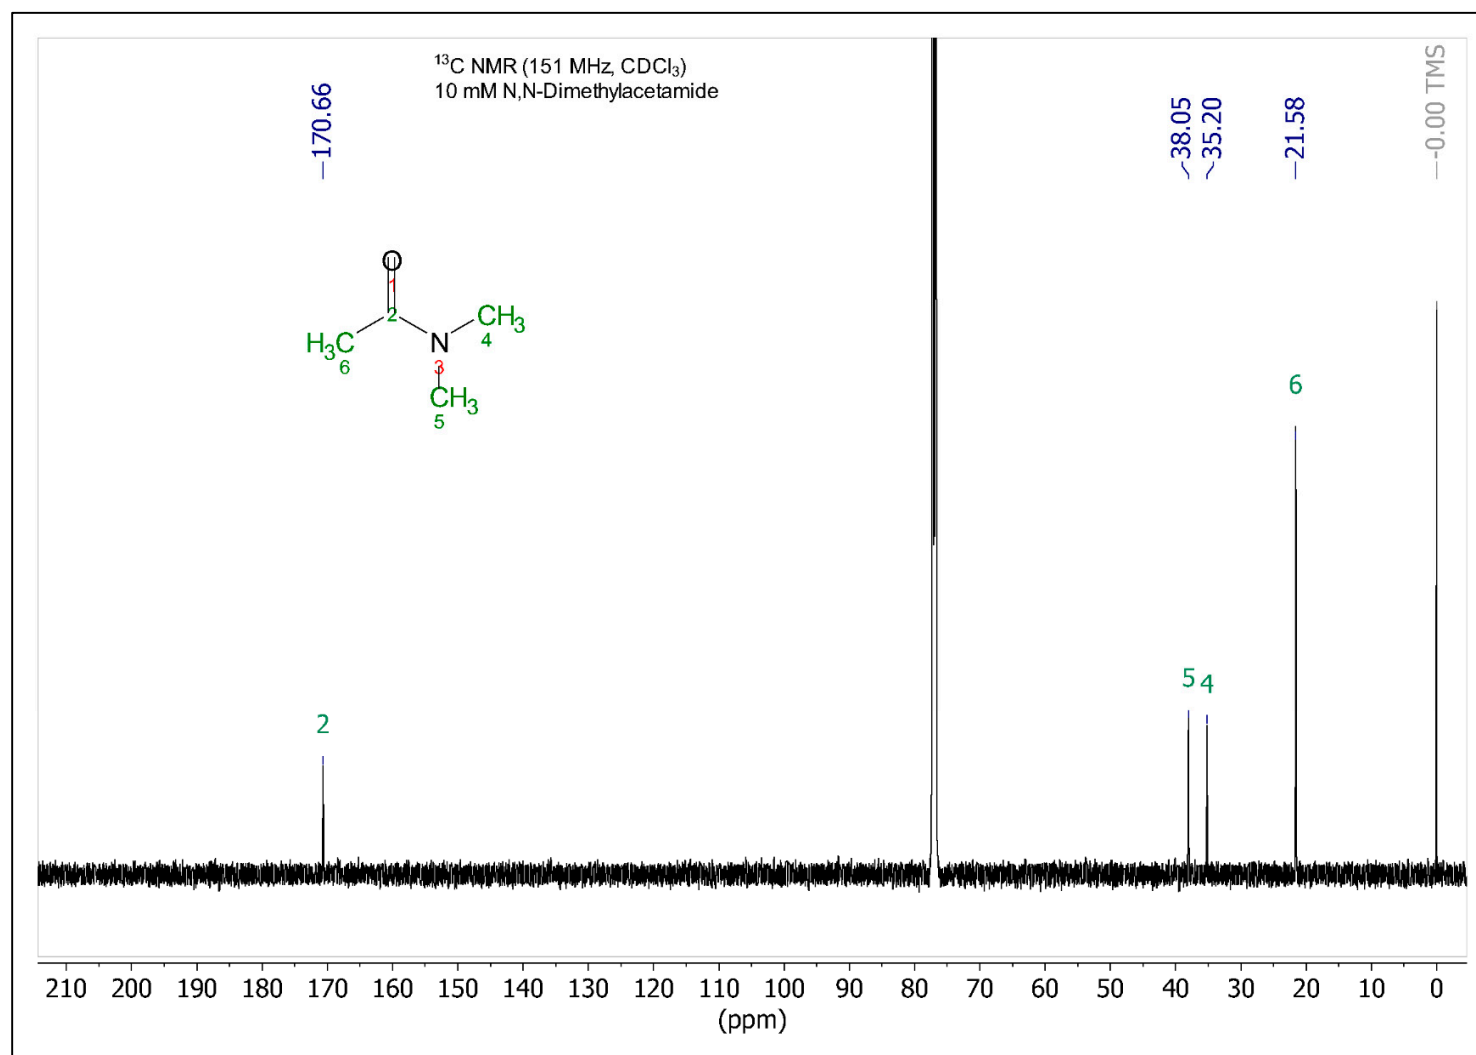



<sup>1</sup>H selective NOESY NMR (600 MHz, CDCl<sub>3</sub>)  
10 mM N,N-Dimethylacetamide

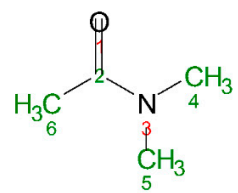

<sup>1</sup>H reference spectrum

<sup>1</sup>H selective NOESY  
of 2.08 ppm peak

Chemical shift (ppm) scale from 1.5 to 4.7.

$^1\text{H} / ^{13}\text{C}$  HSQC NMR (600 / 151 MHz,  $\text{CDCl}_3$ )  
10 mM N,N-Dimethylacetamide

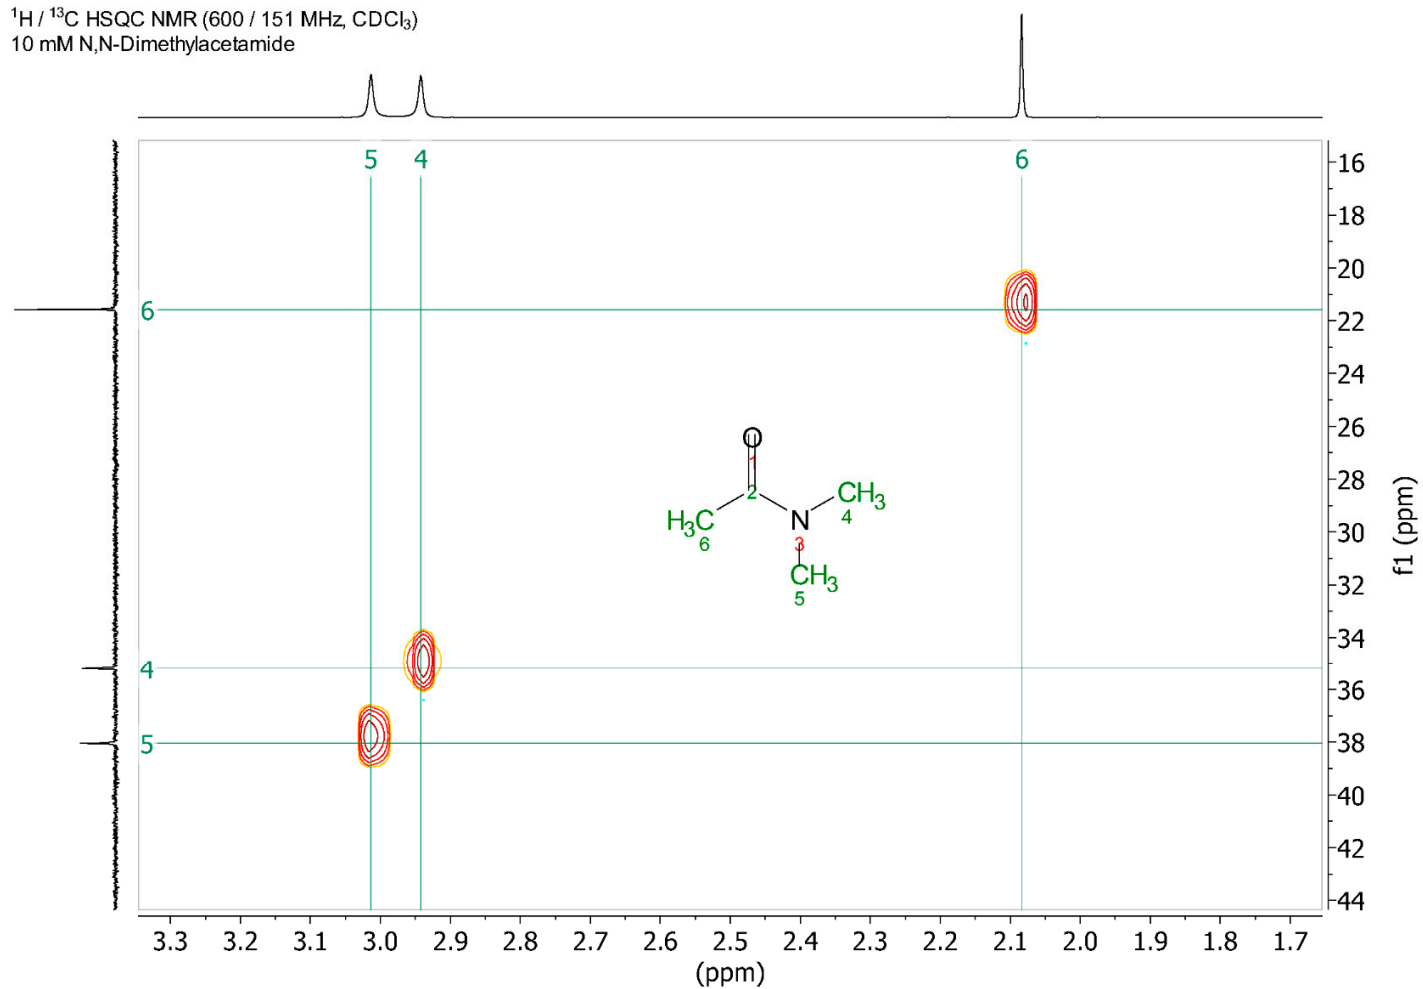

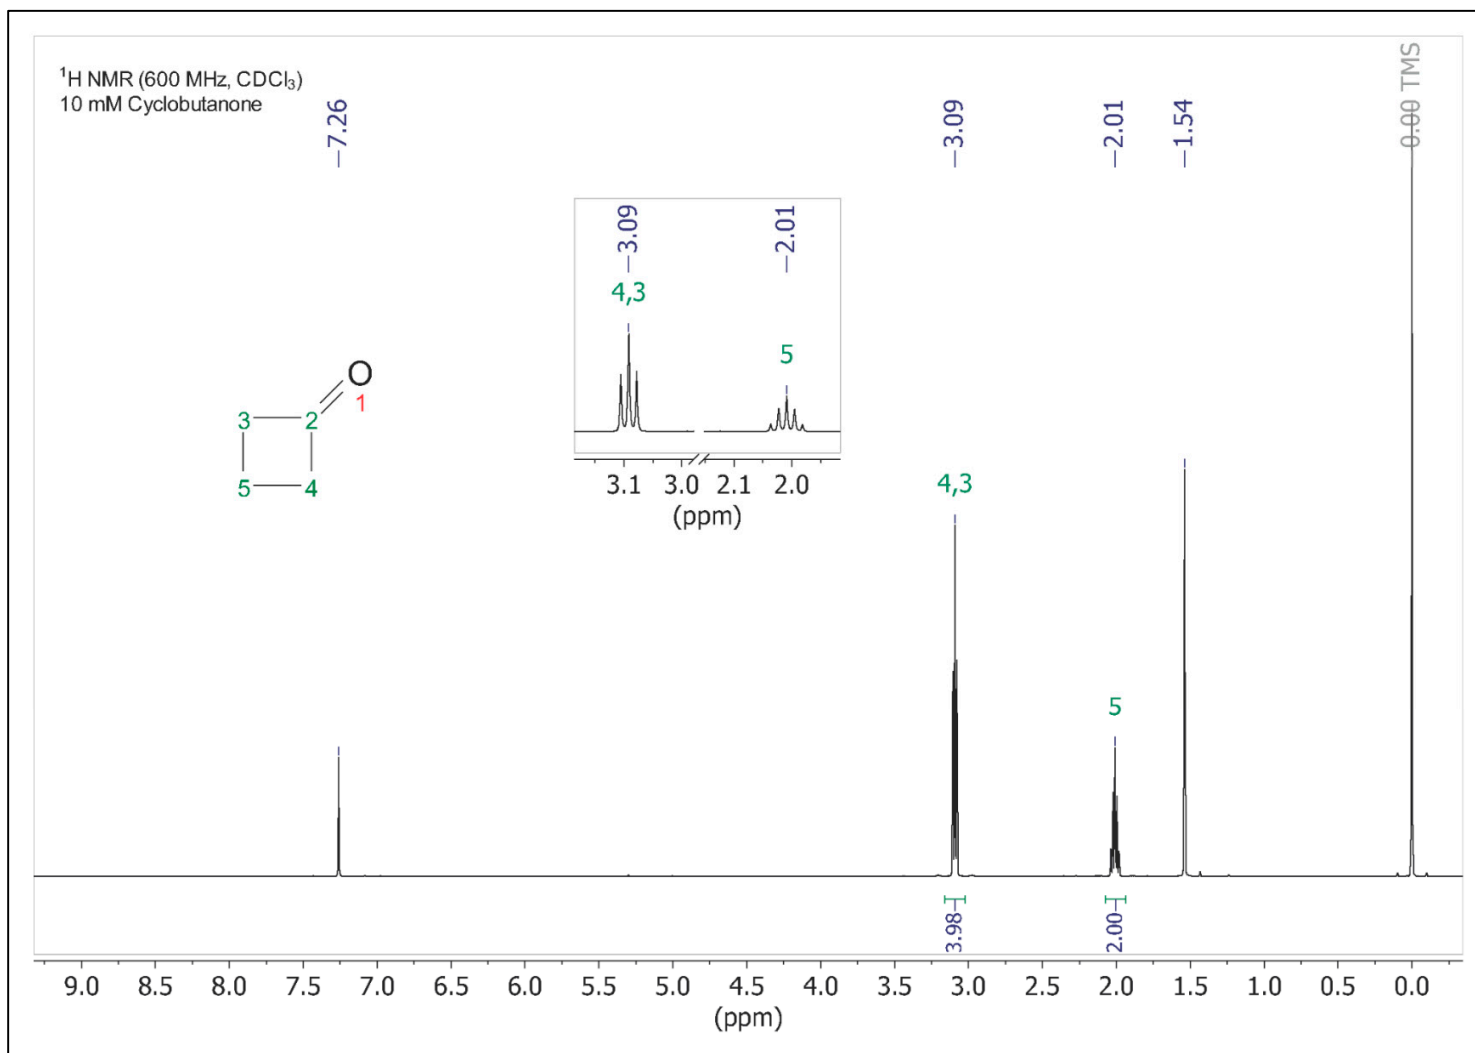

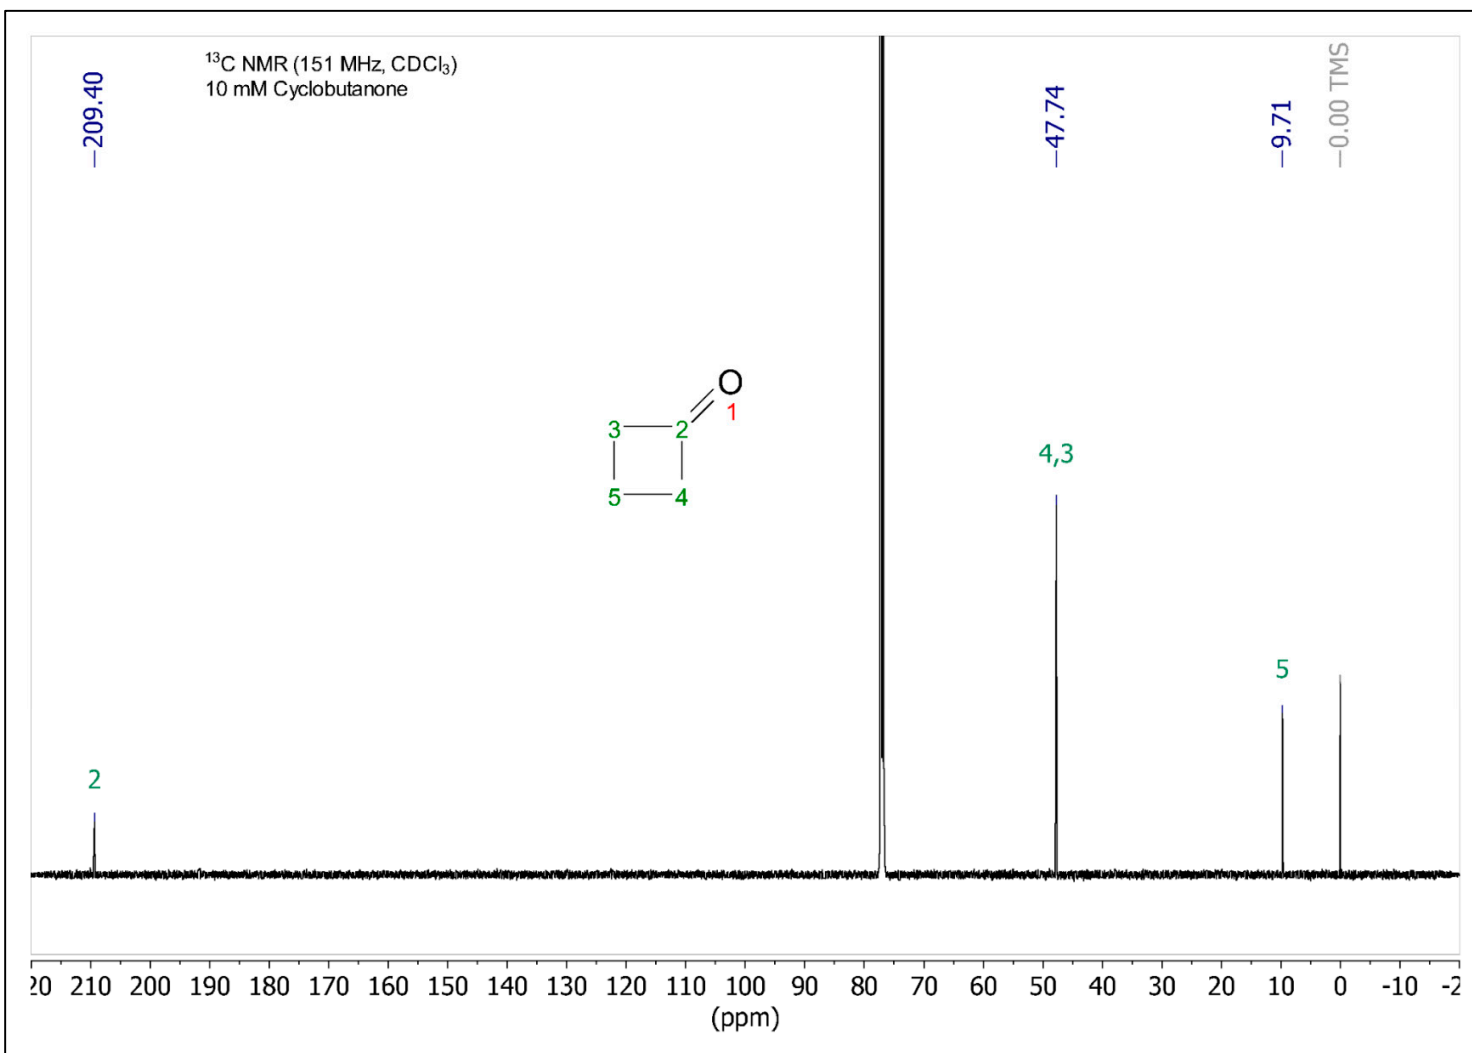

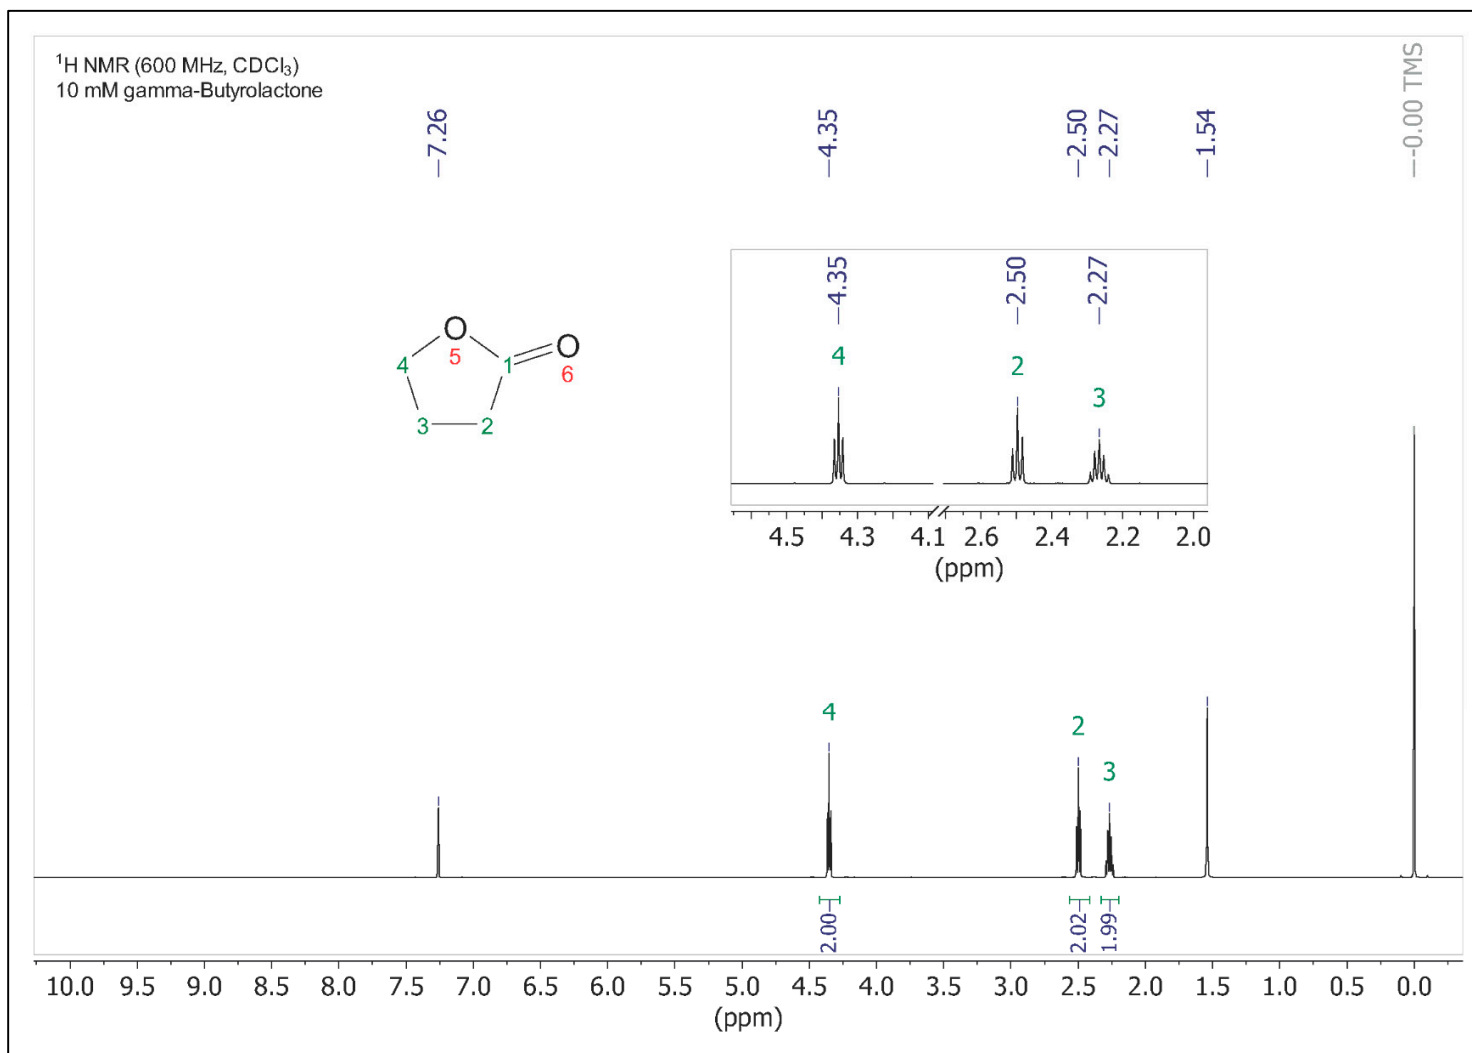

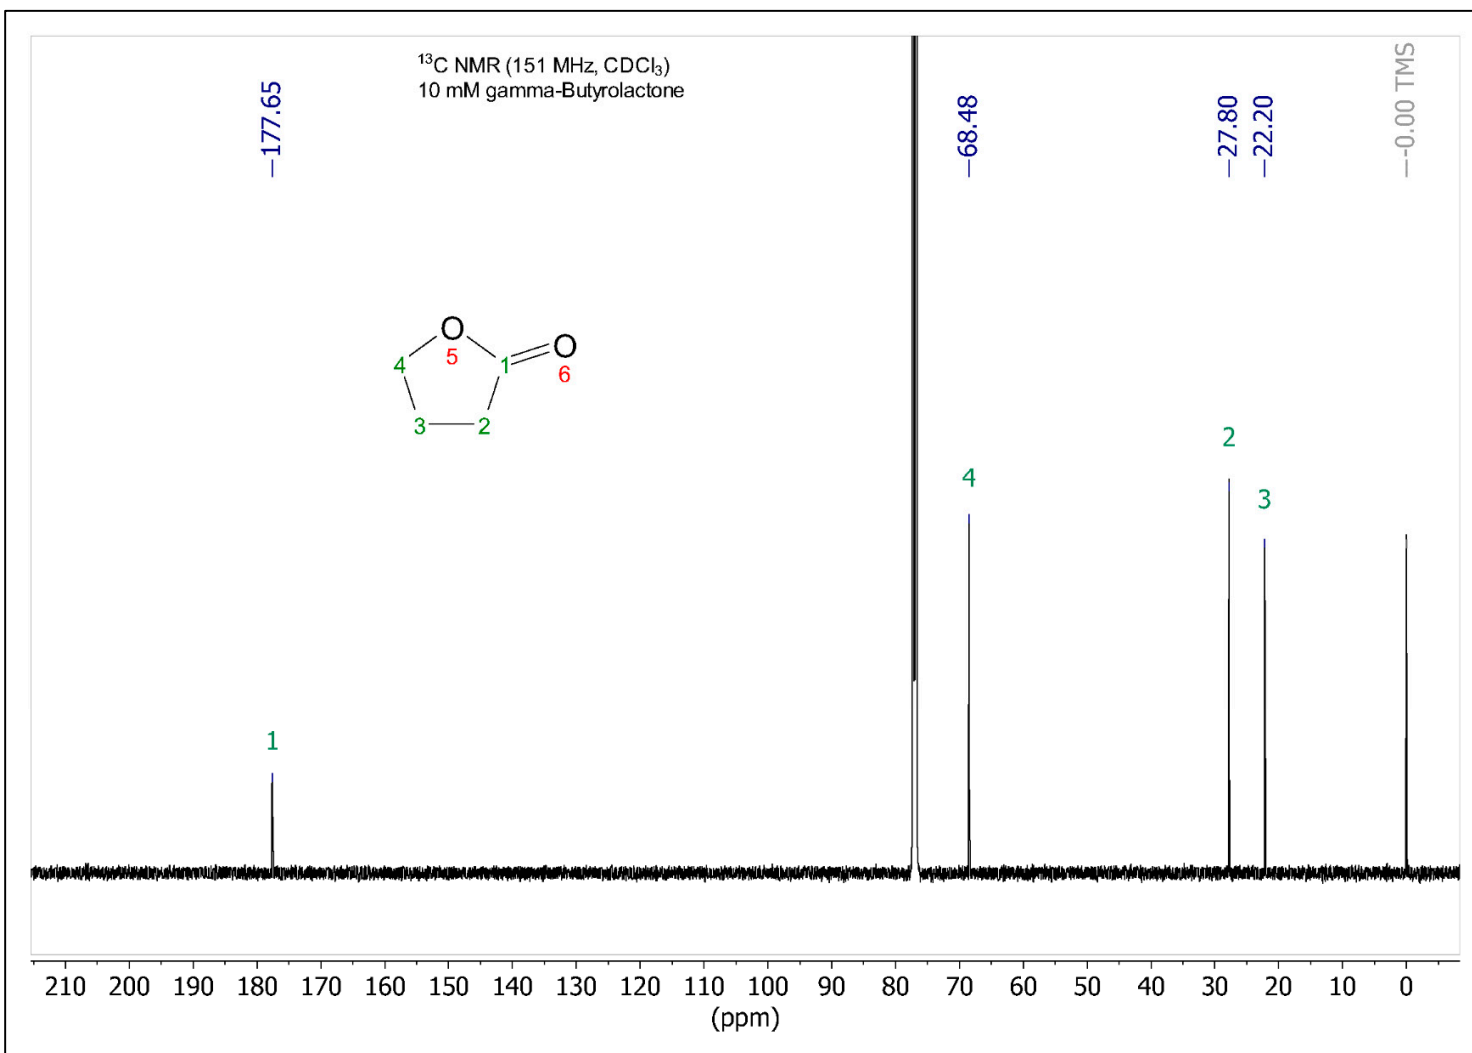

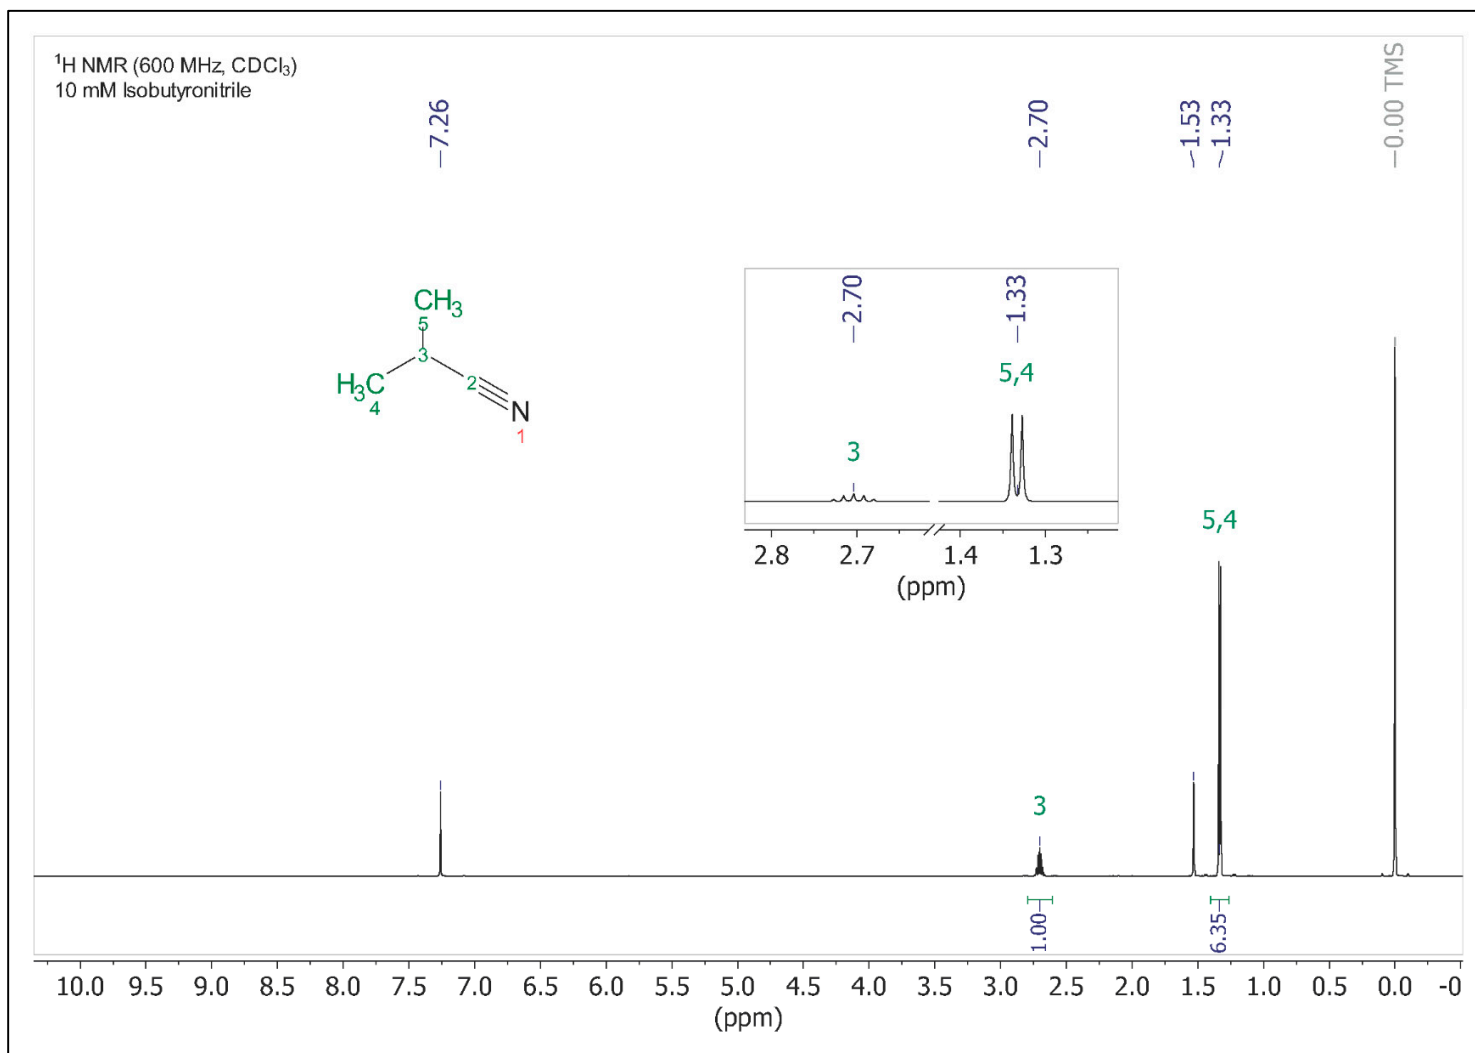

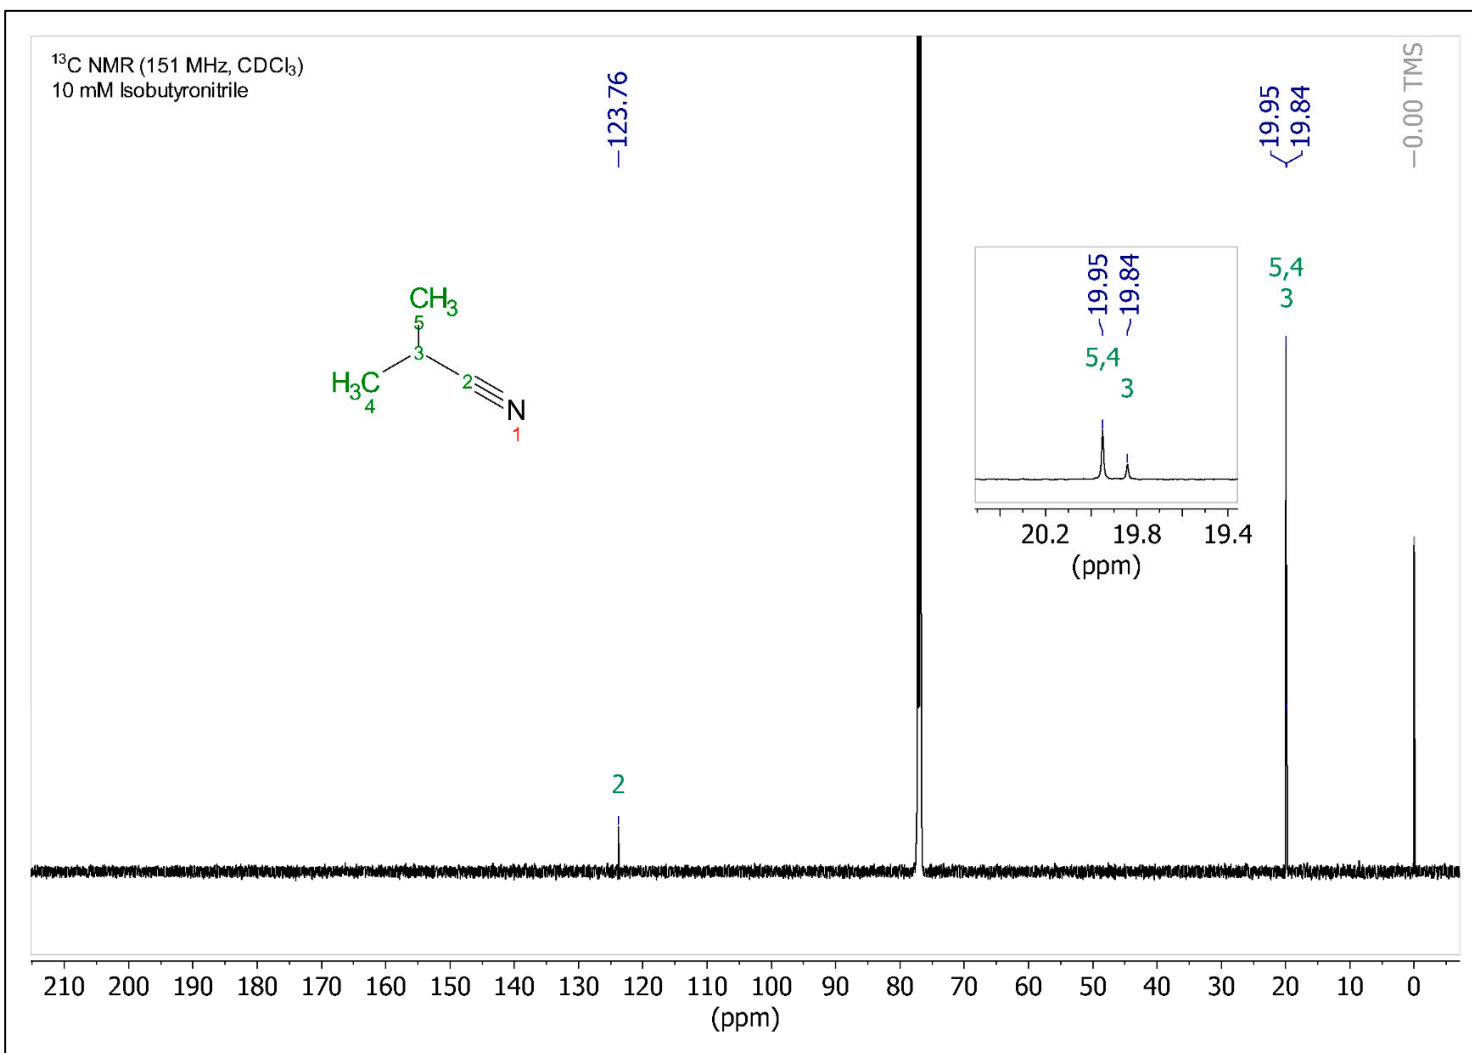



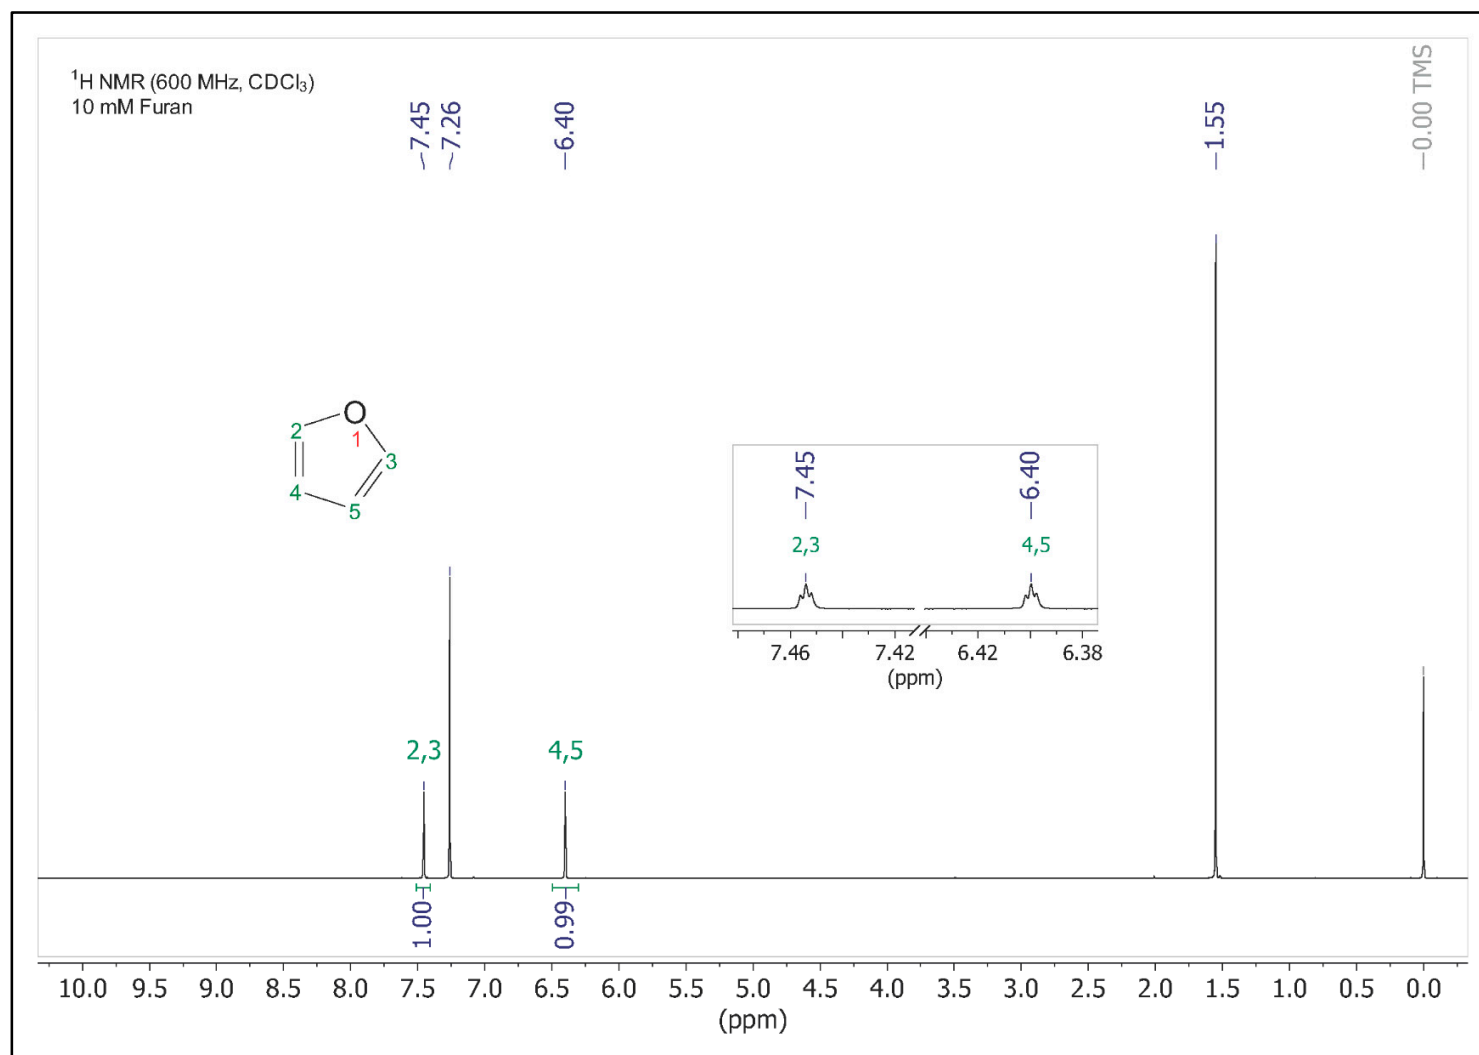

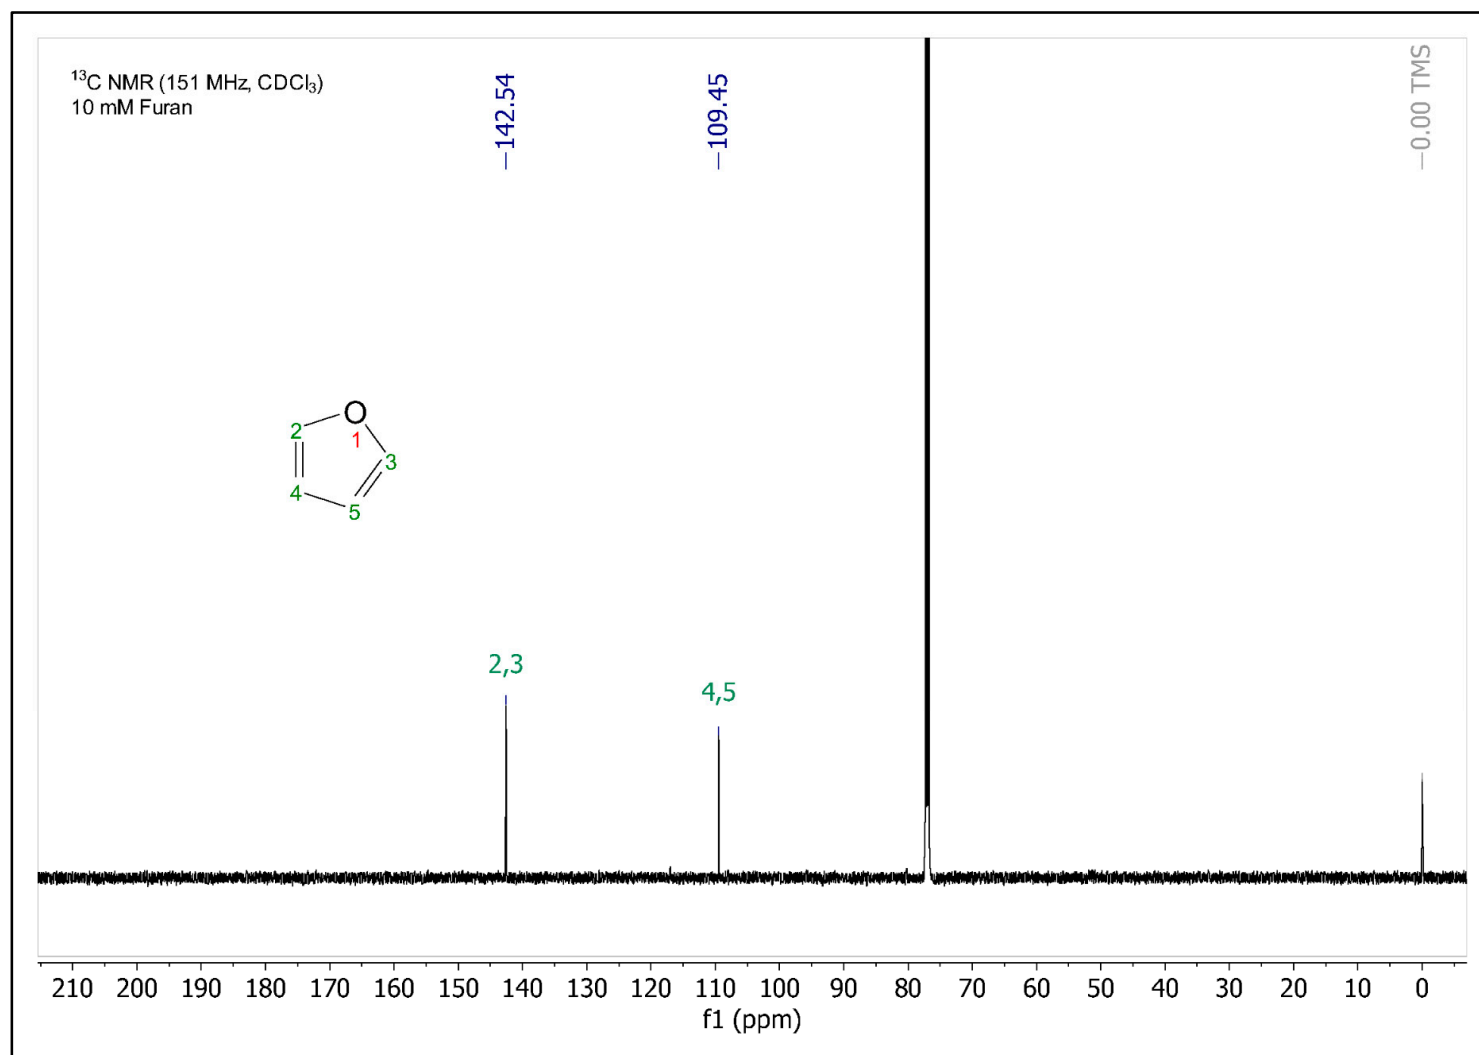

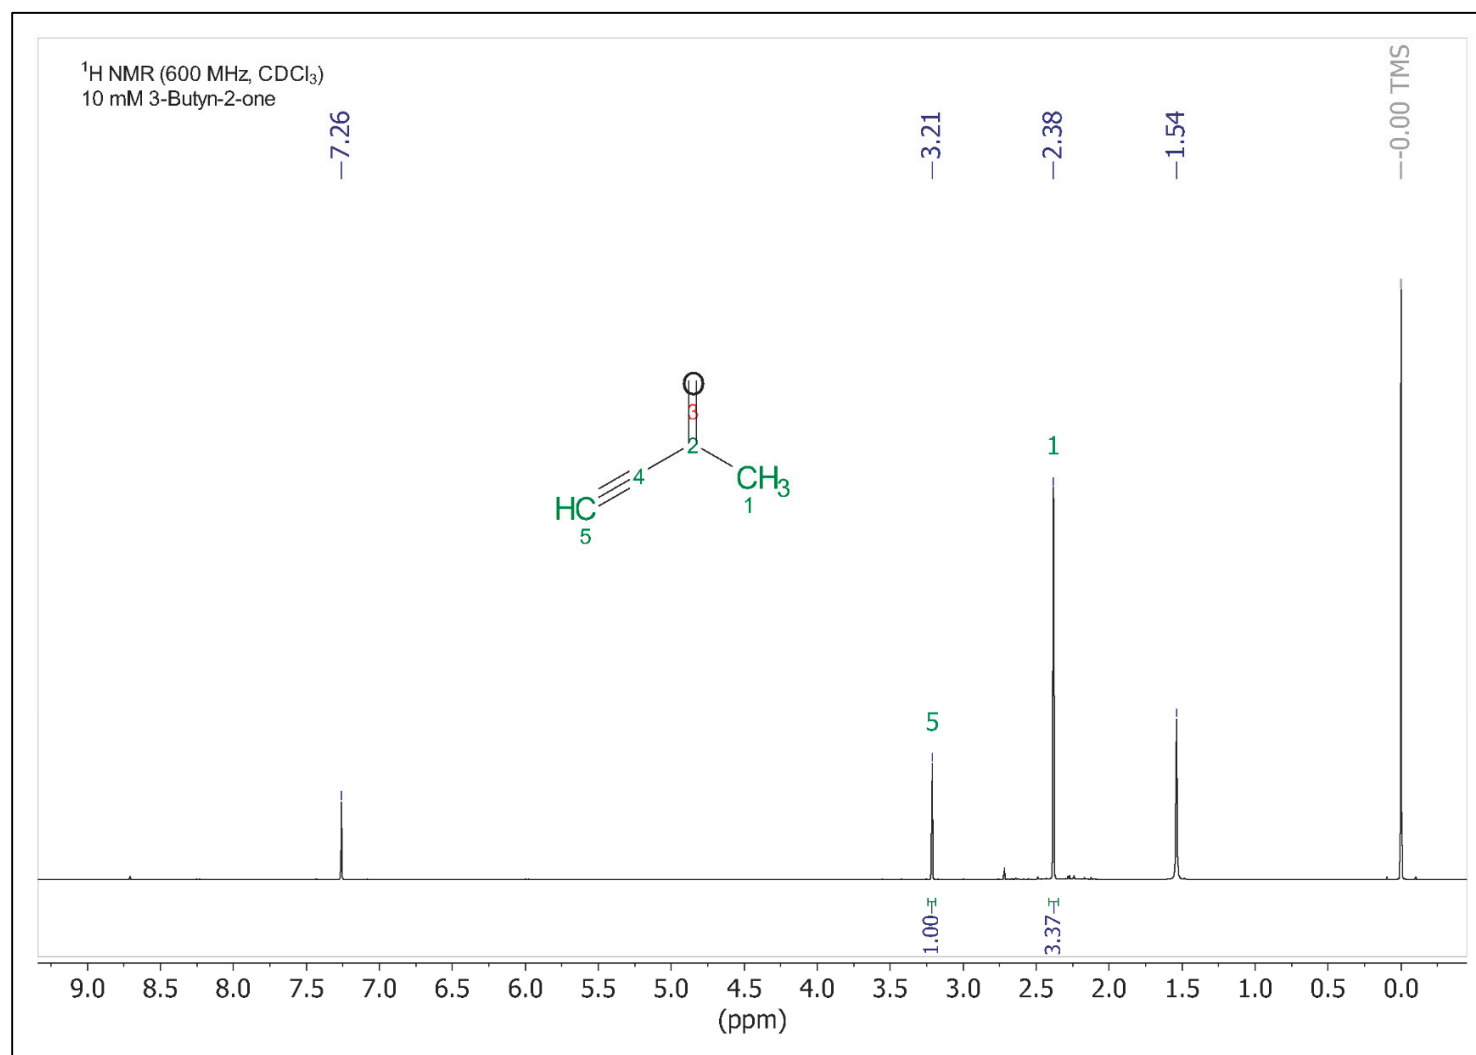

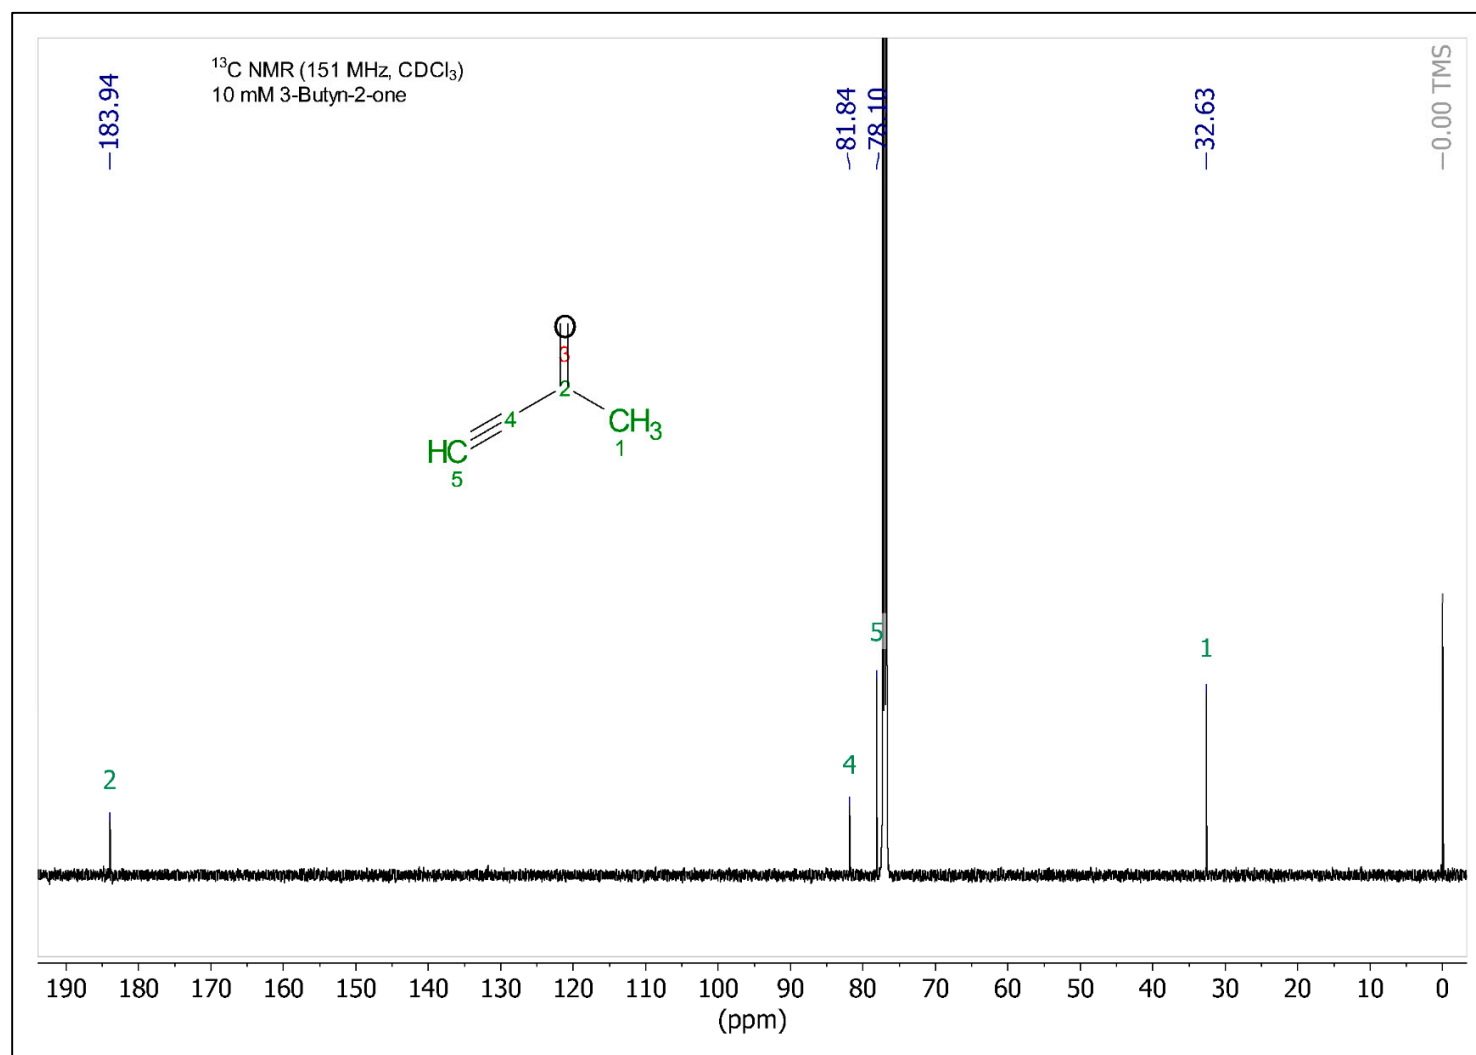

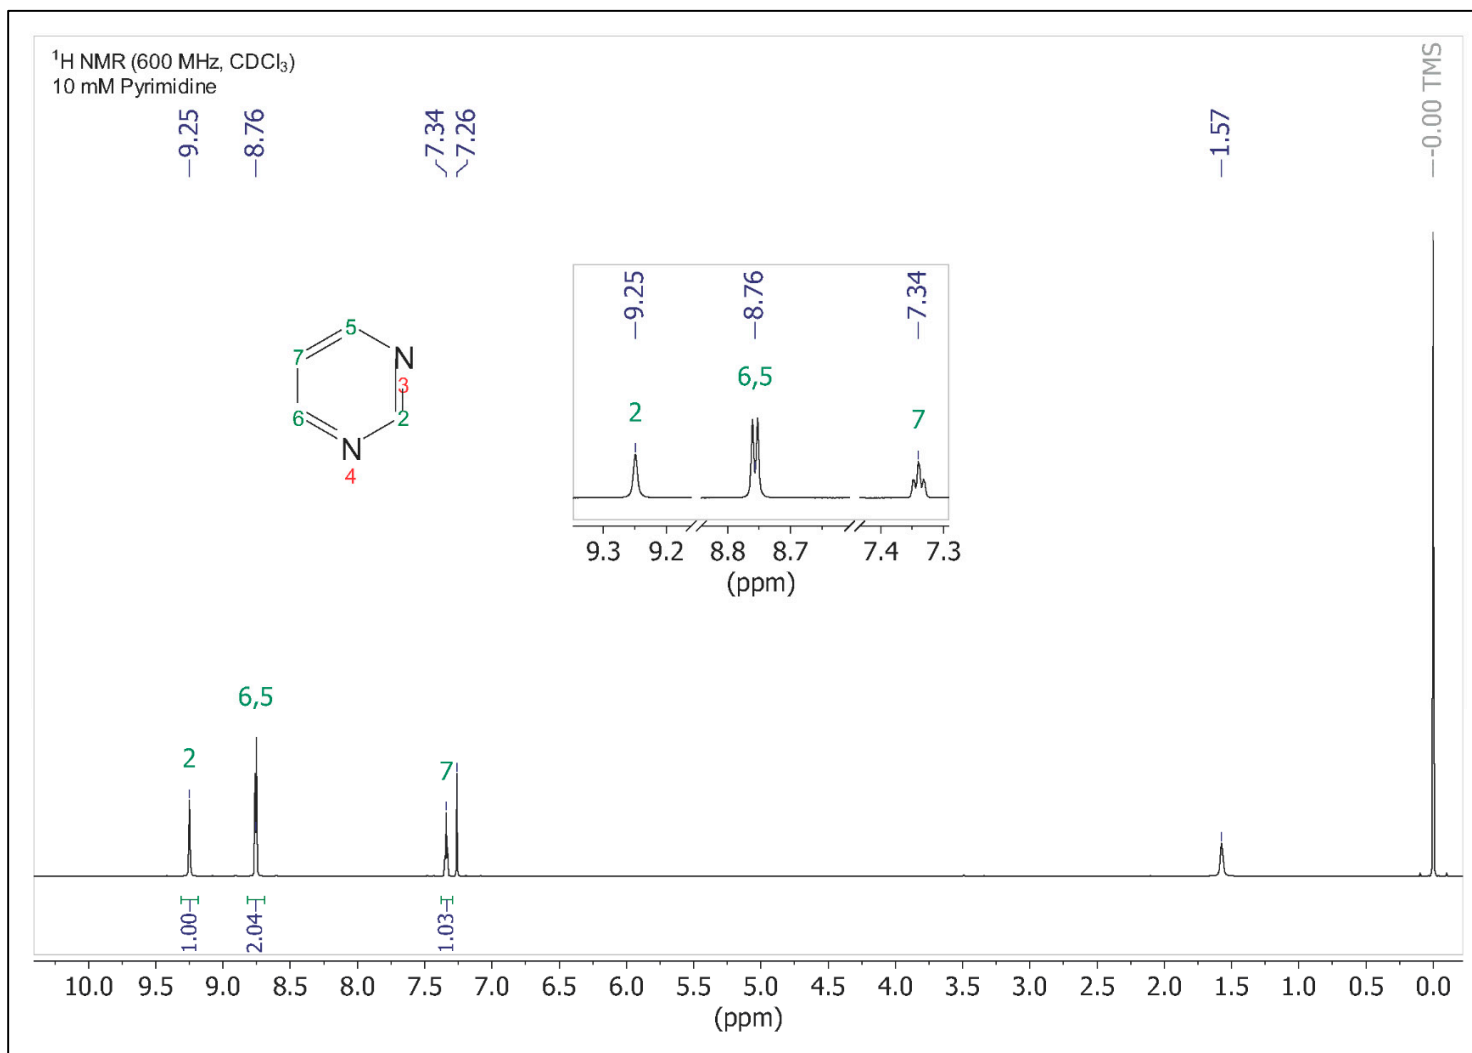

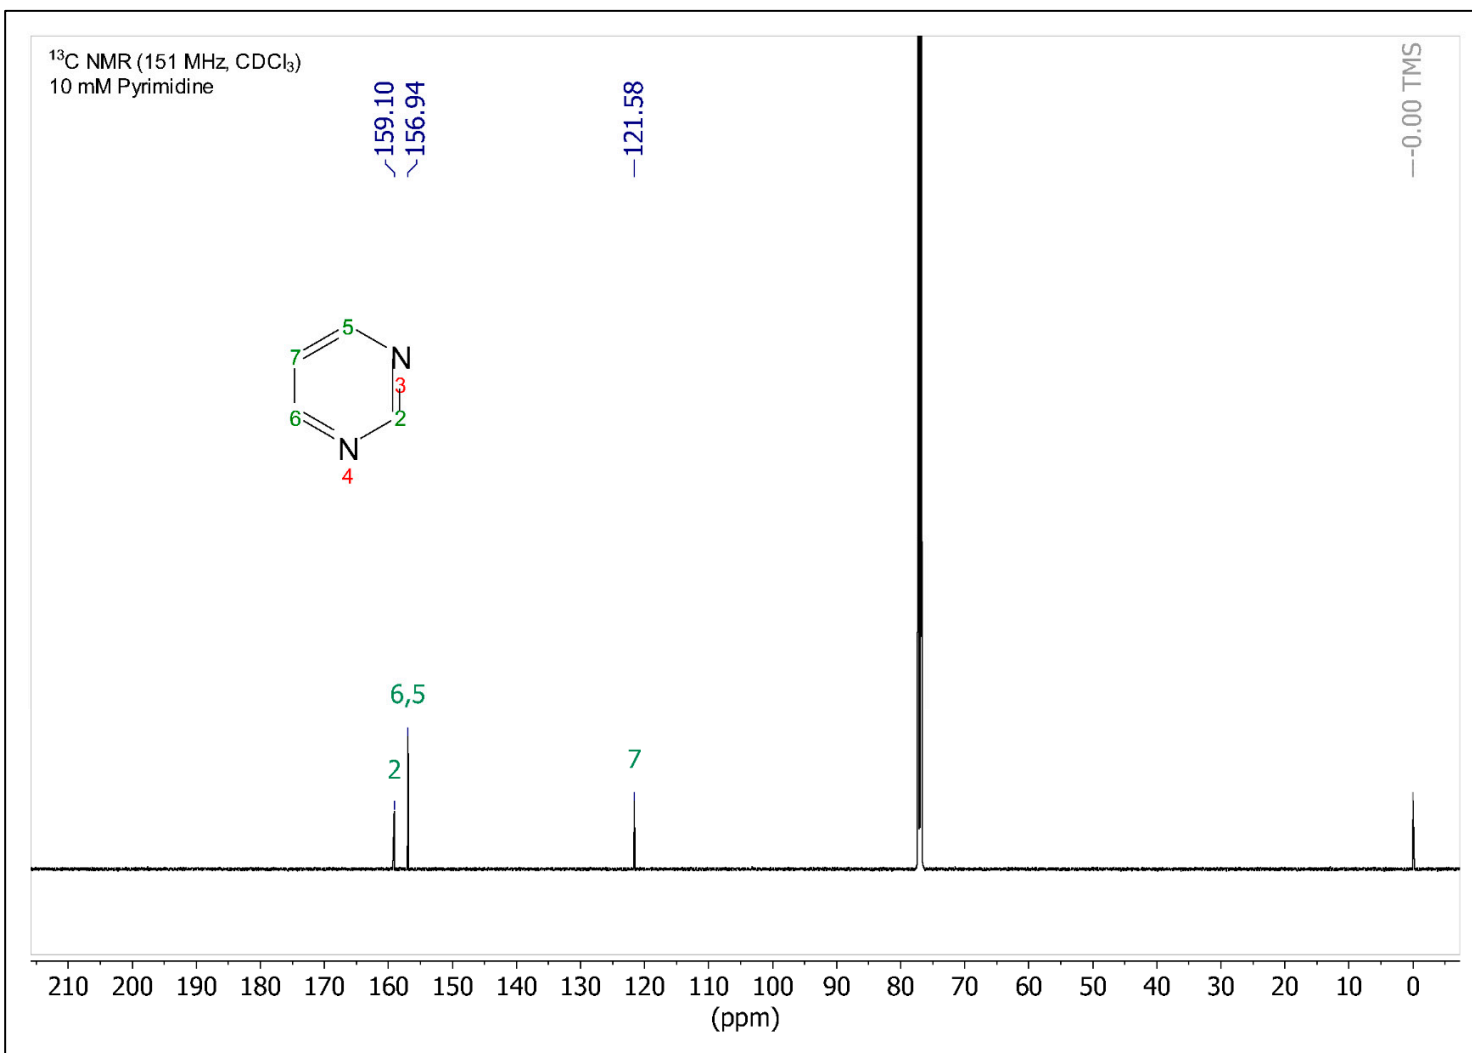

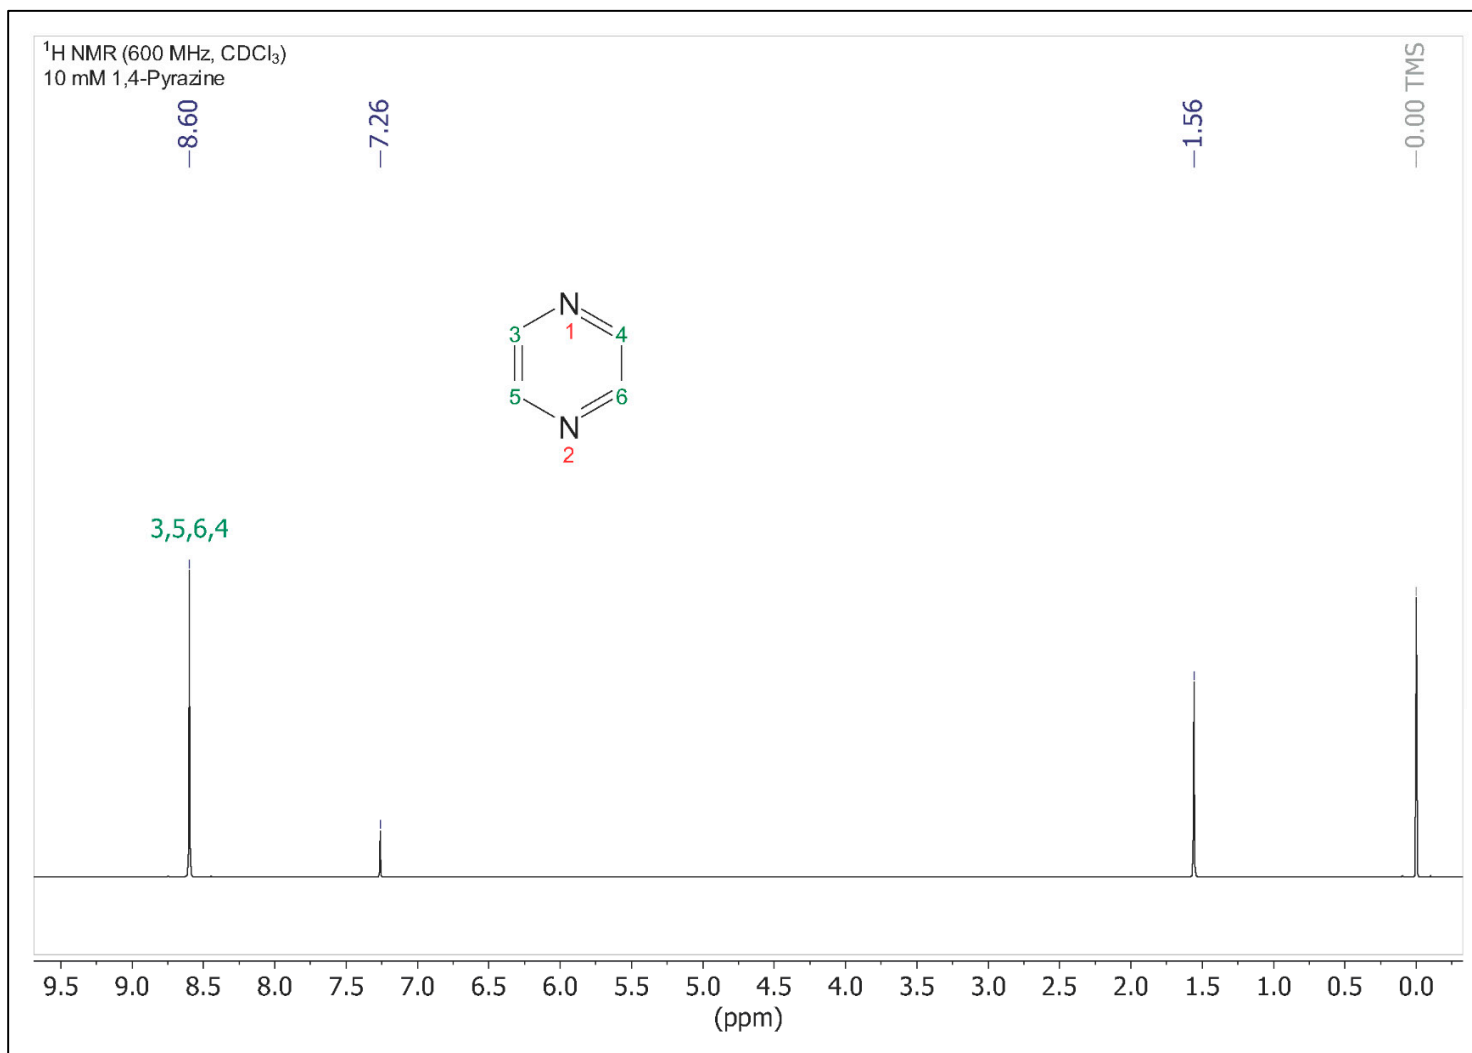

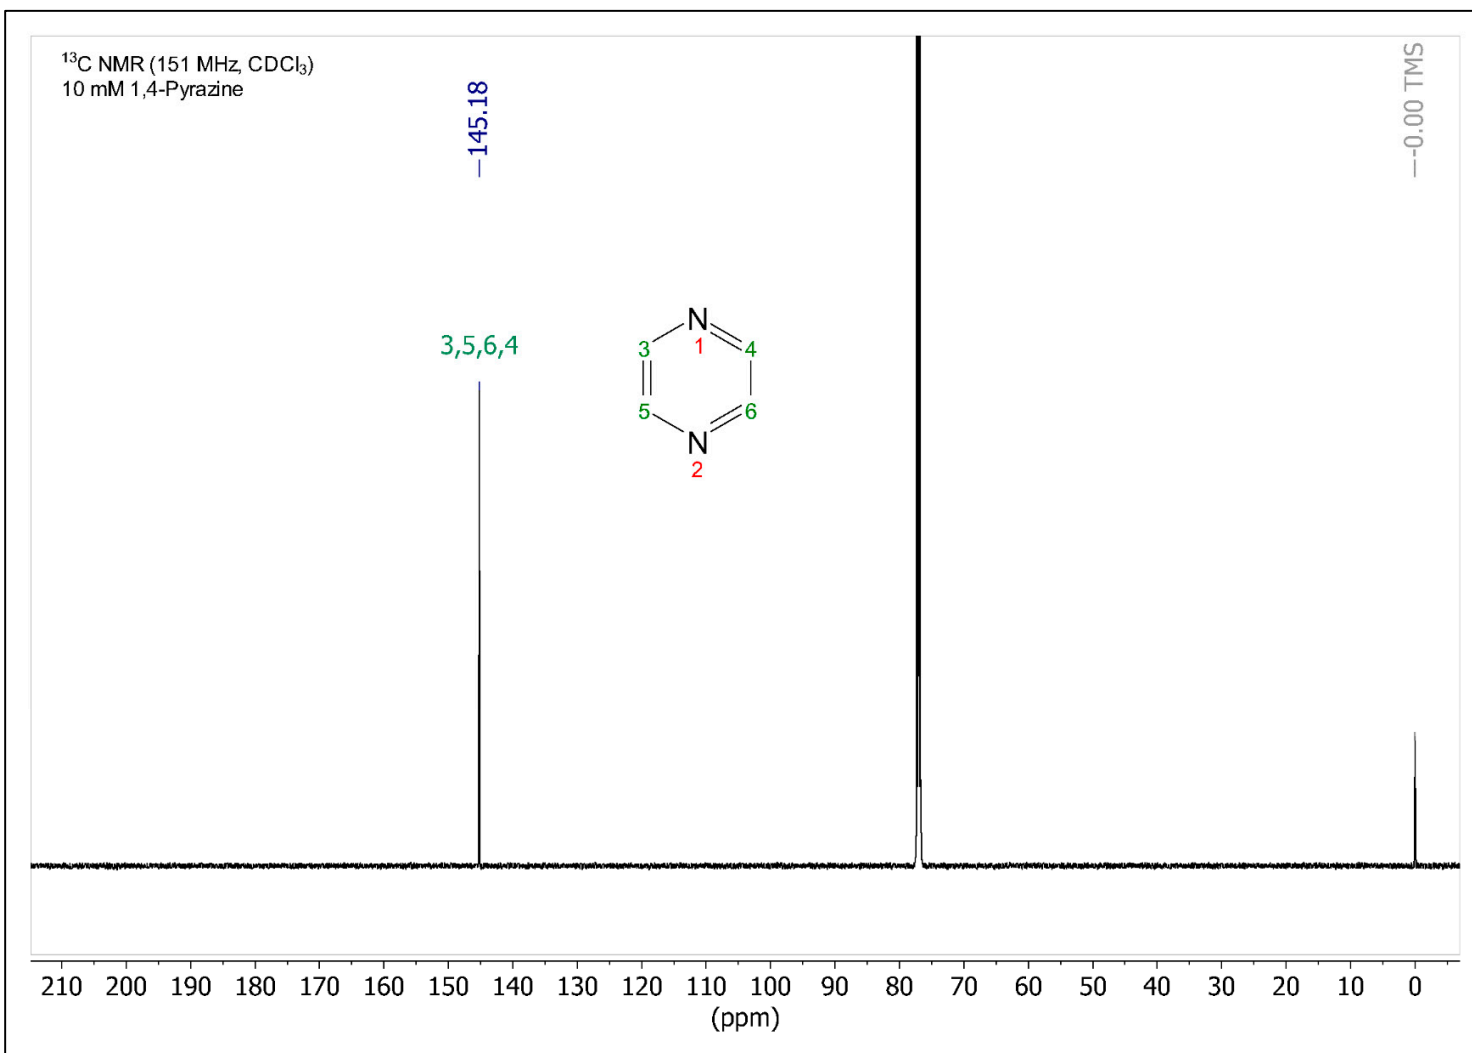



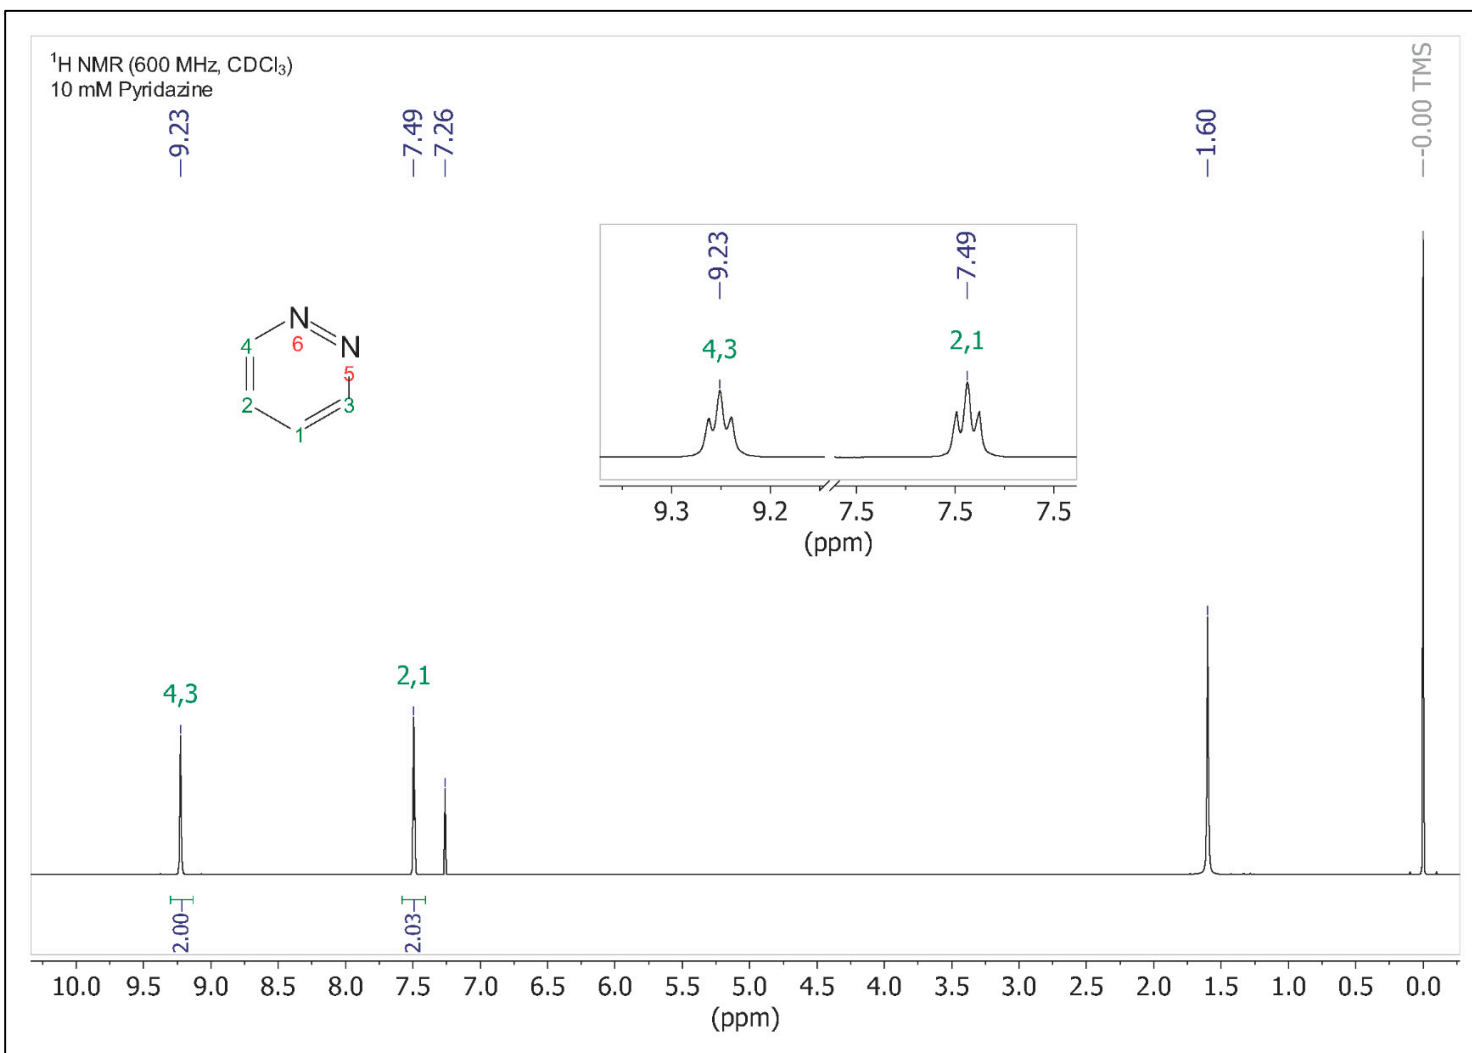

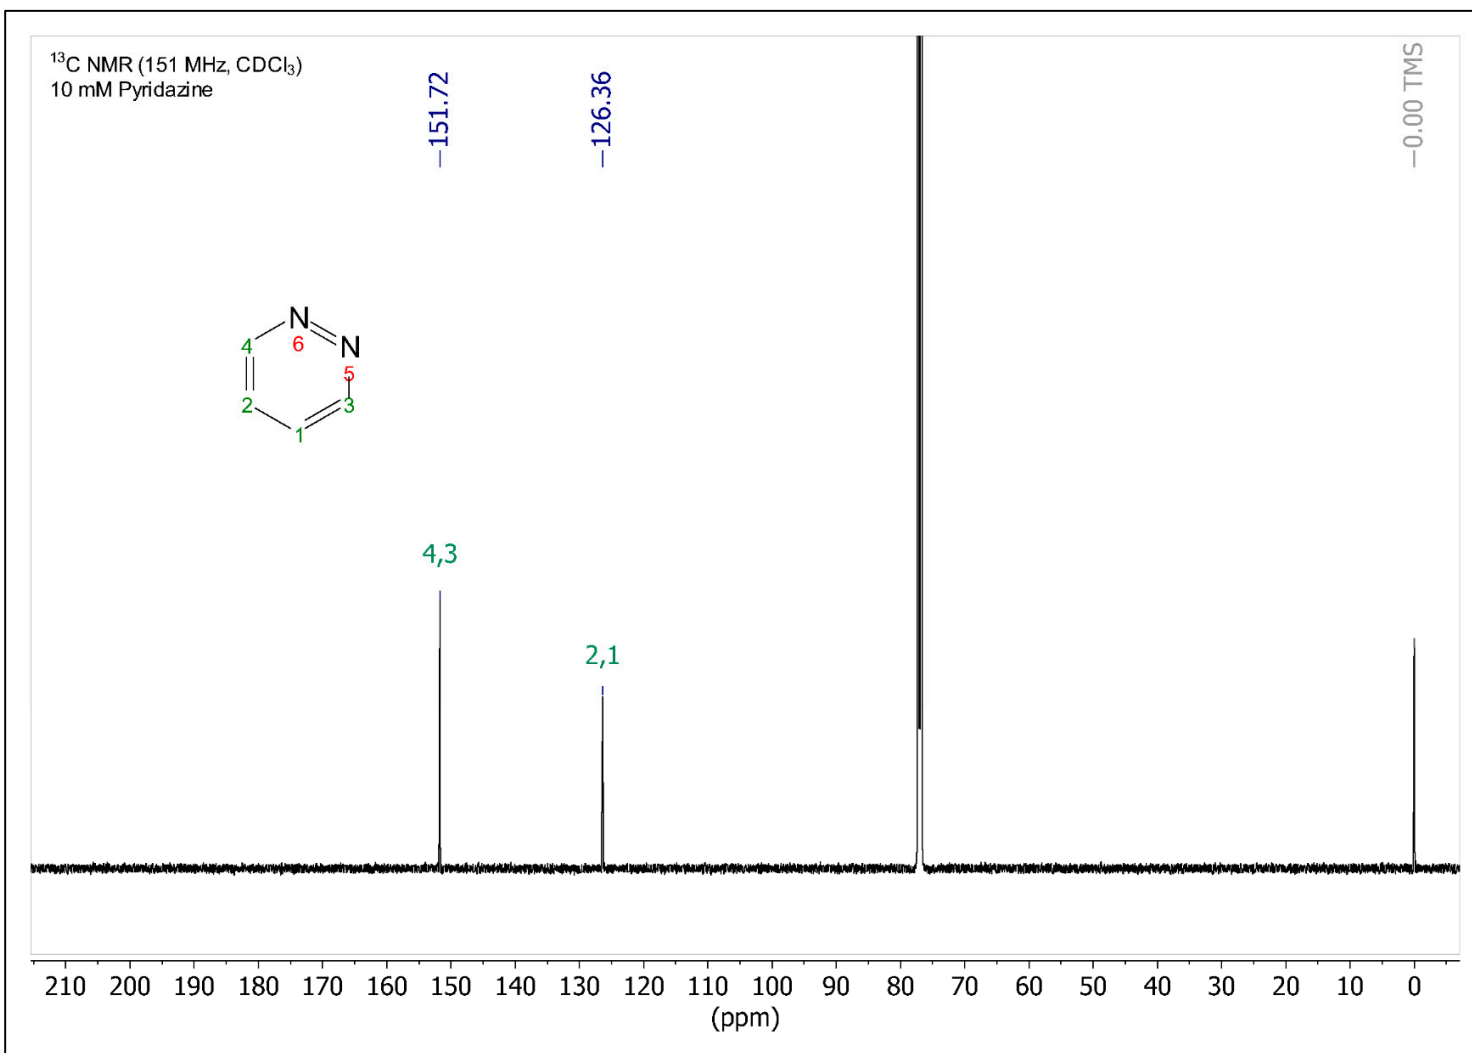

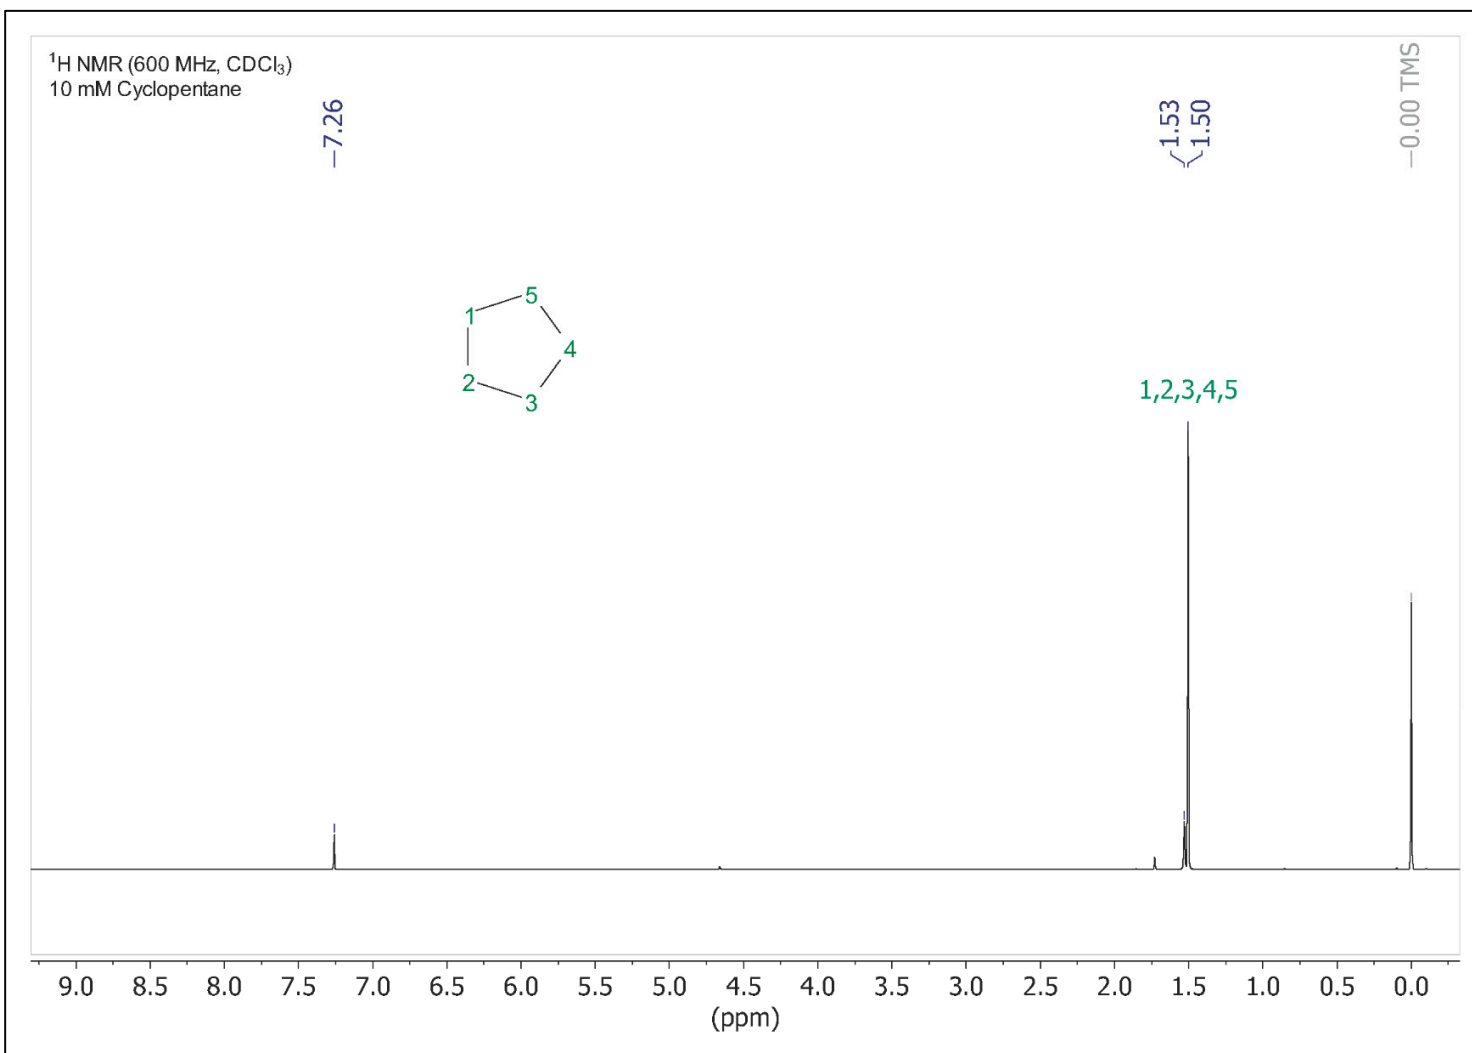

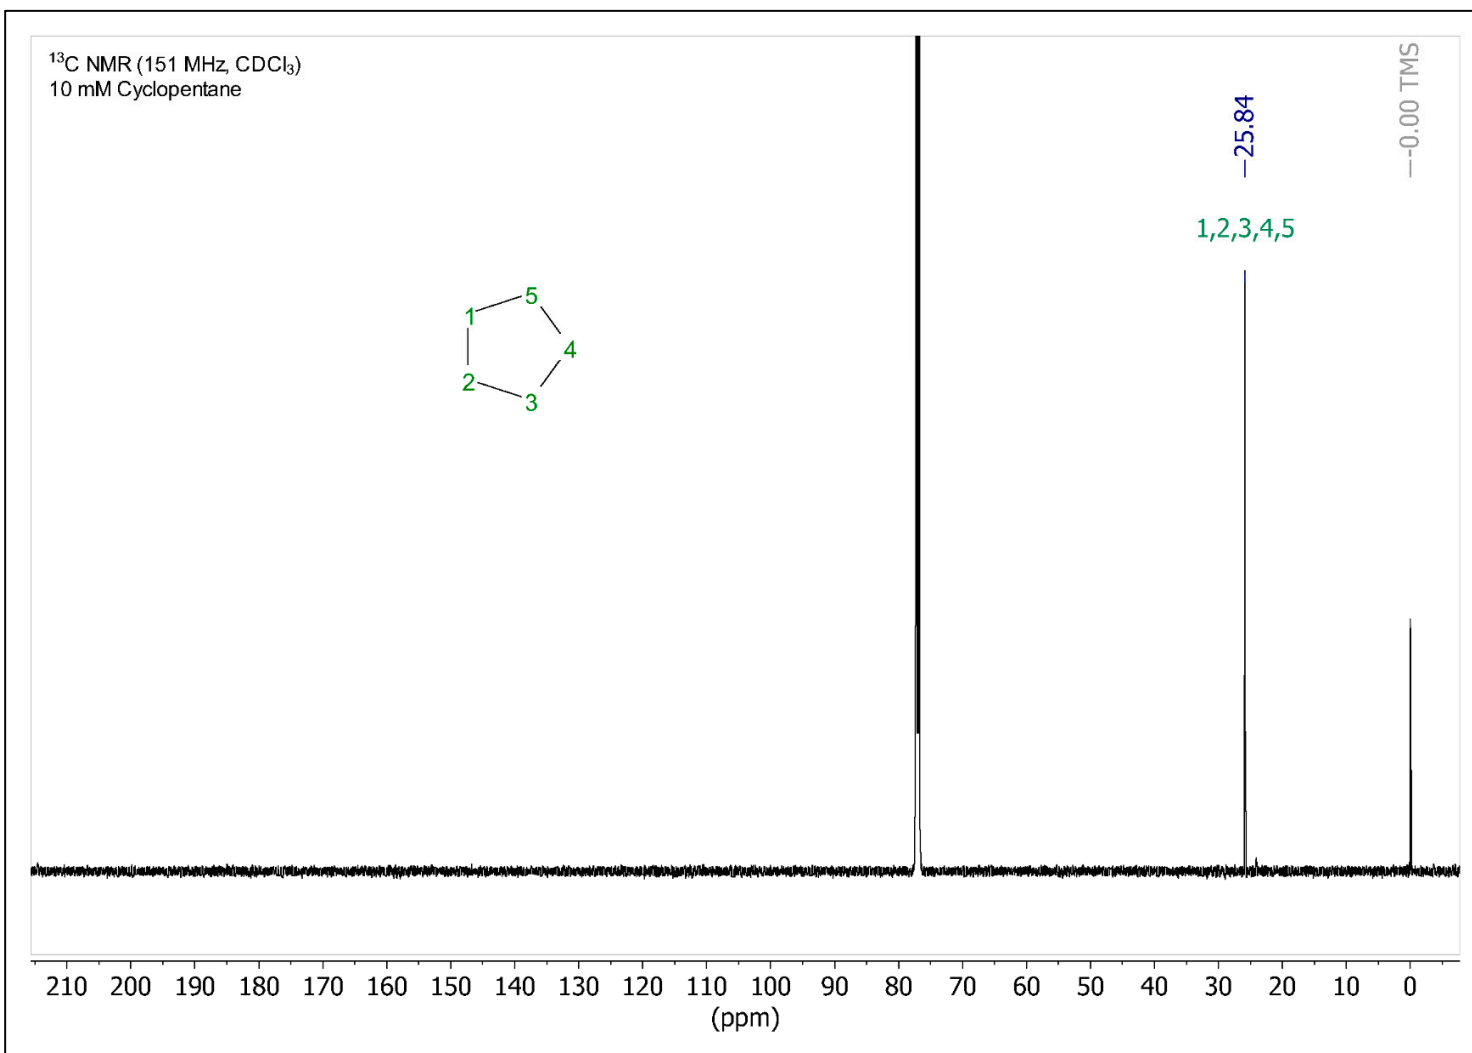

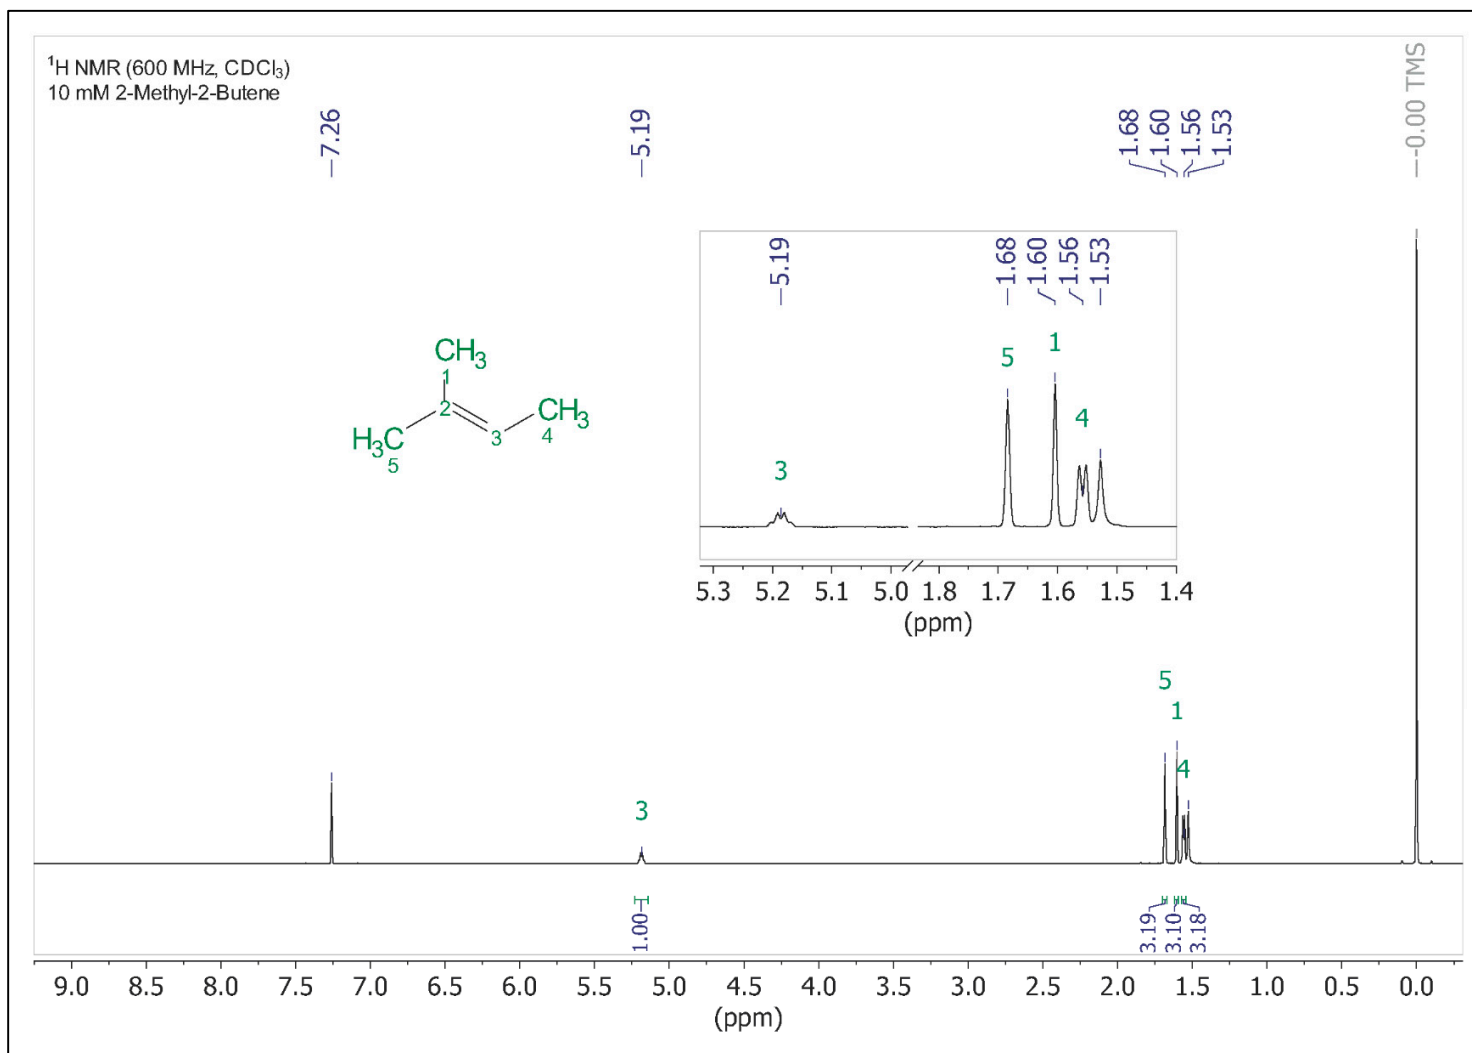

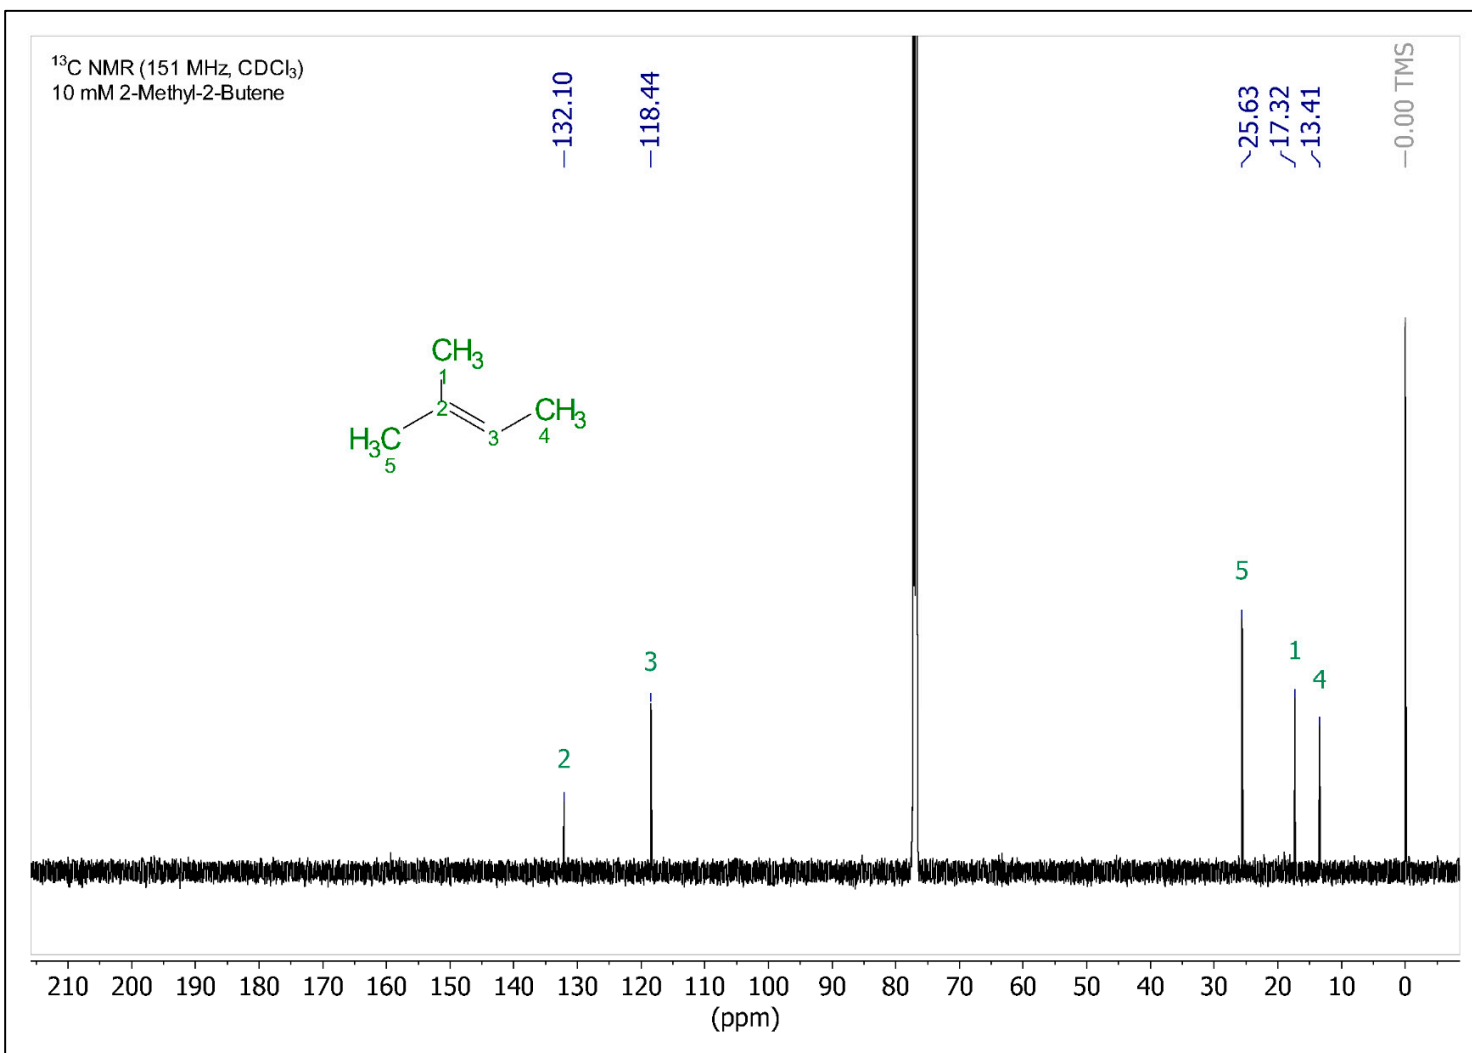

$^1\text{H}$  selective NOESY NMR (600 MHz,  $\text{CDCl}_3$ )  
10 mM 2-Methyl-2-Butene

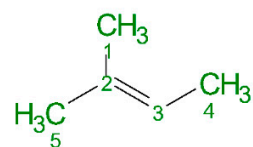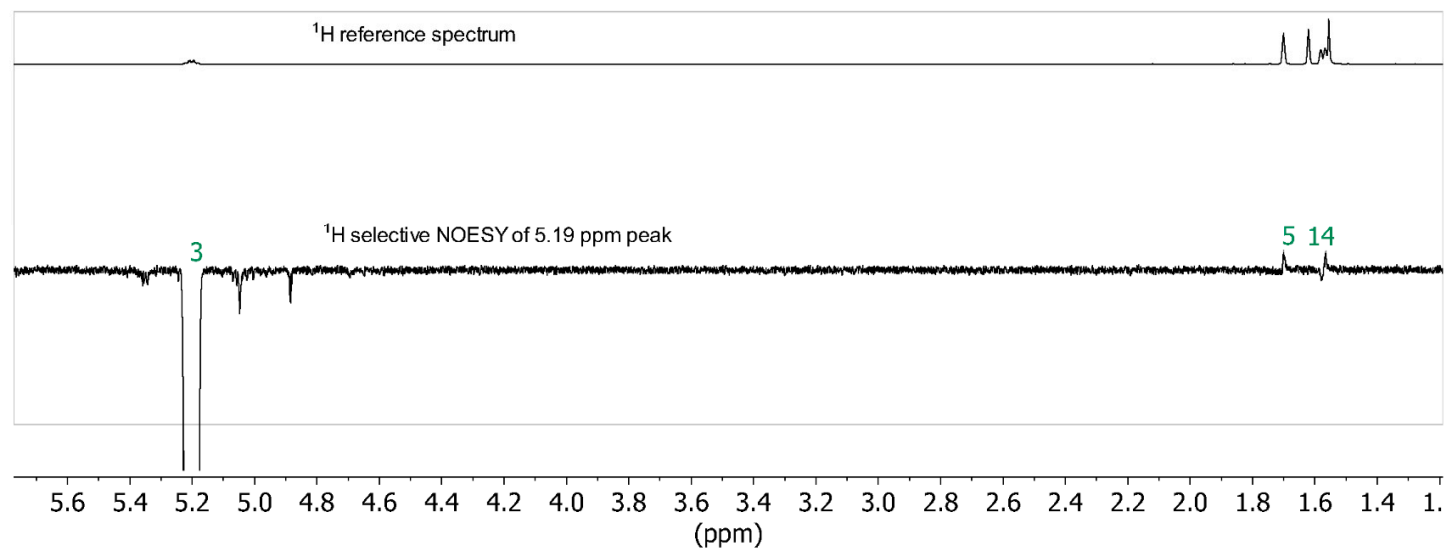

$^1\text{H} / ^{13}\text{C}$  HSQC NMR (600 / 151 MHz,  $\text{CDCl}_3$ )  
10 mM 2-Methyl-2-Butene

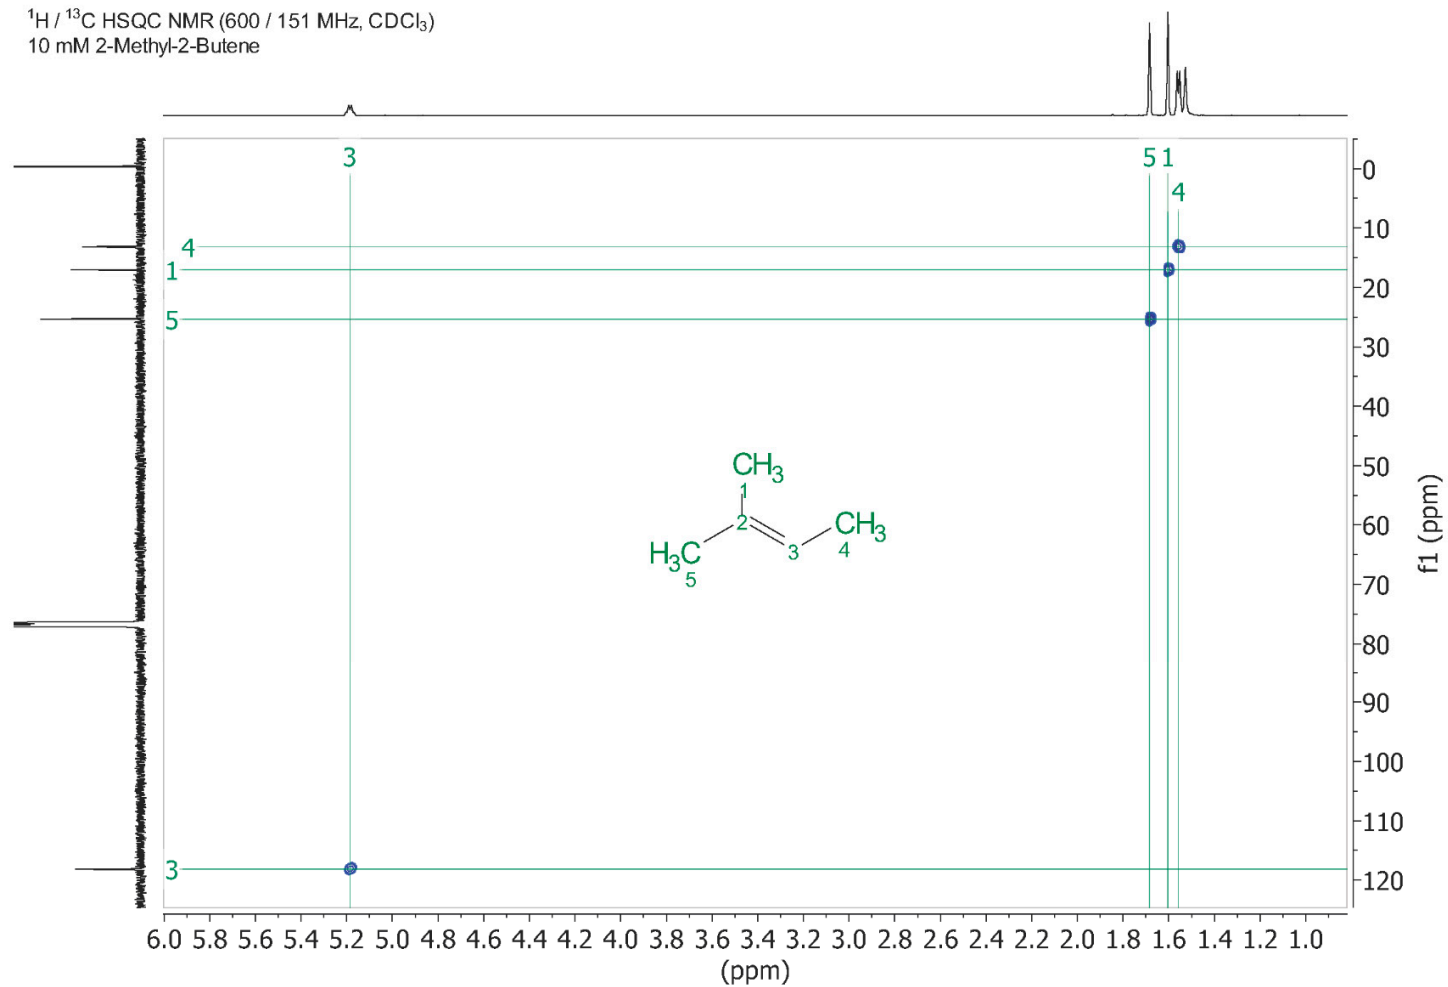



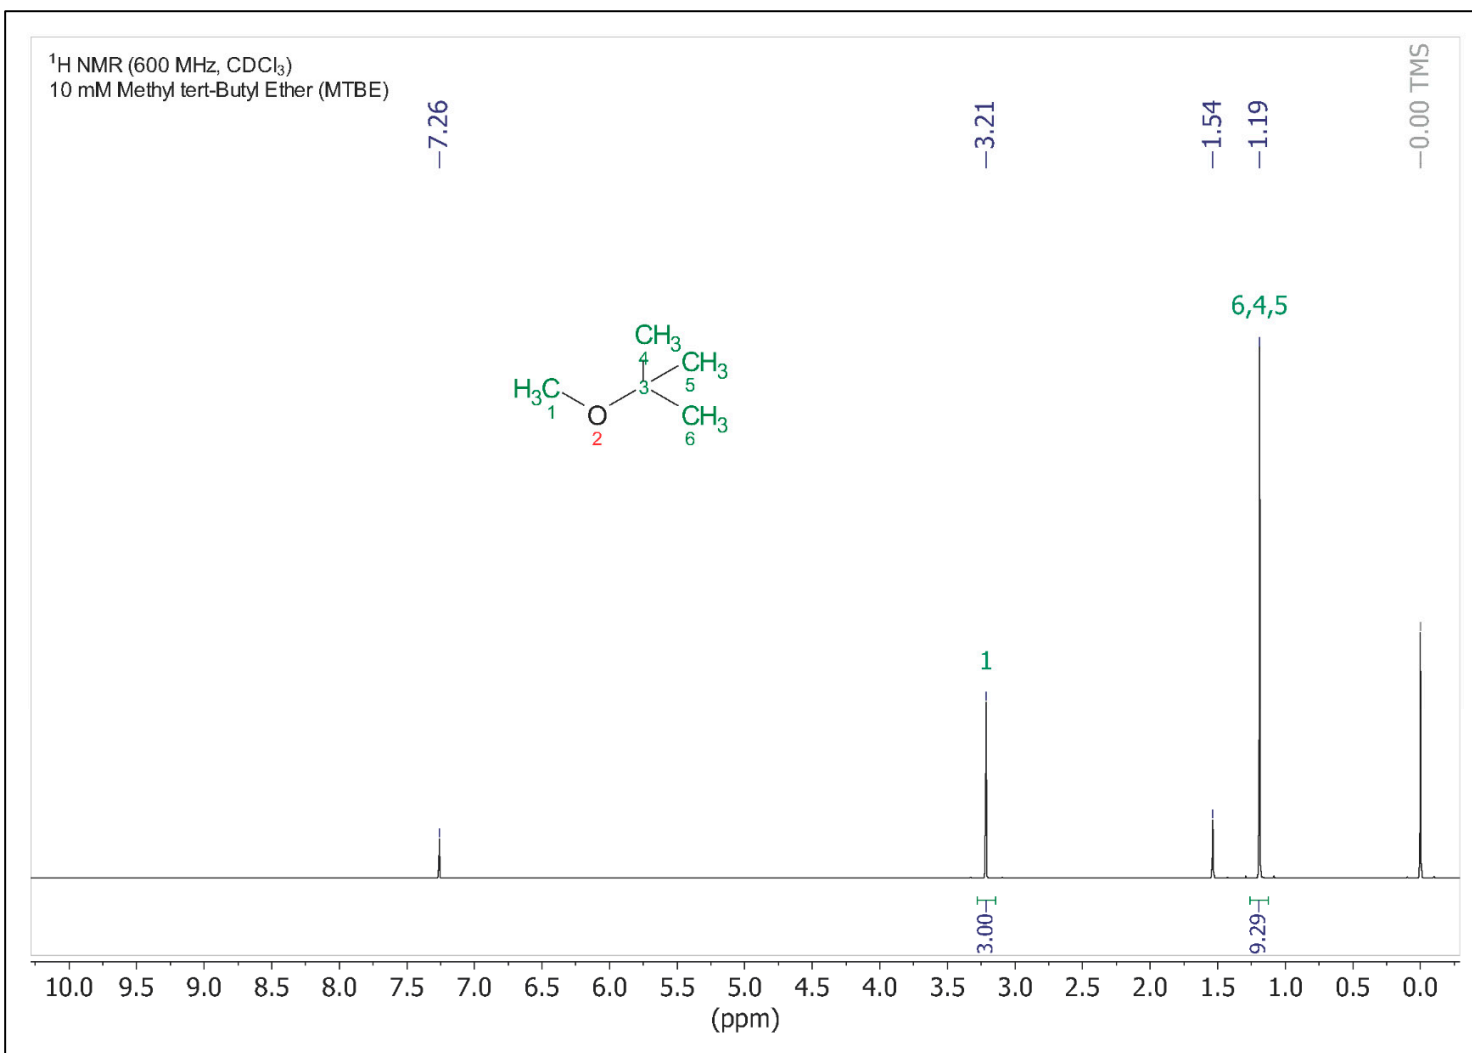

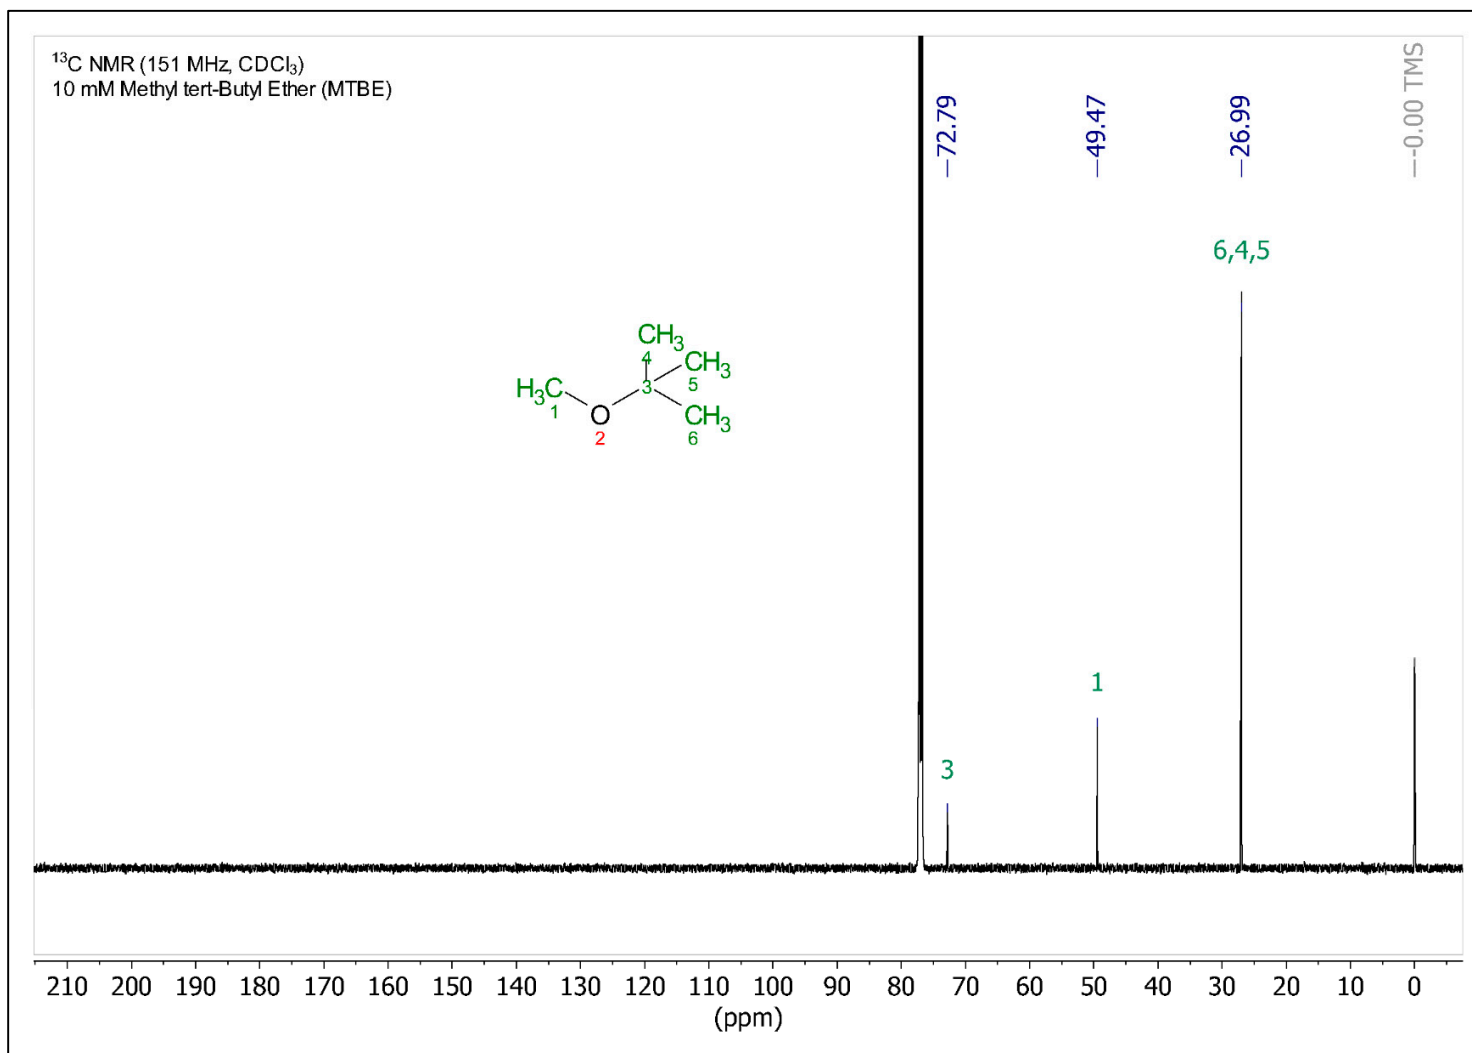

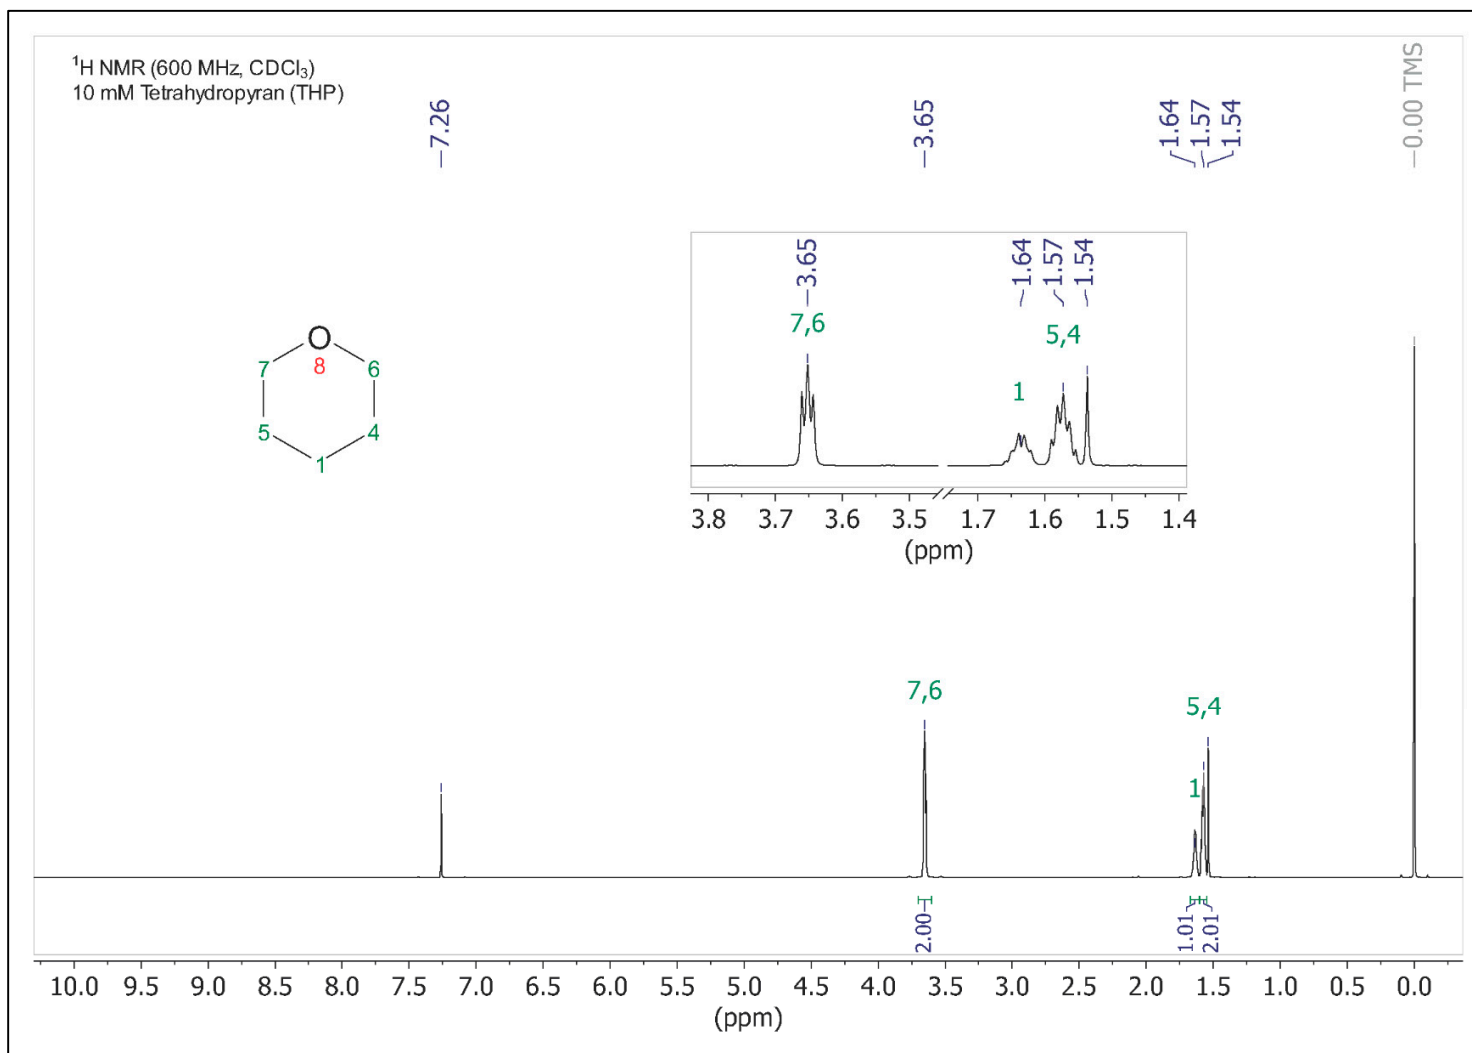

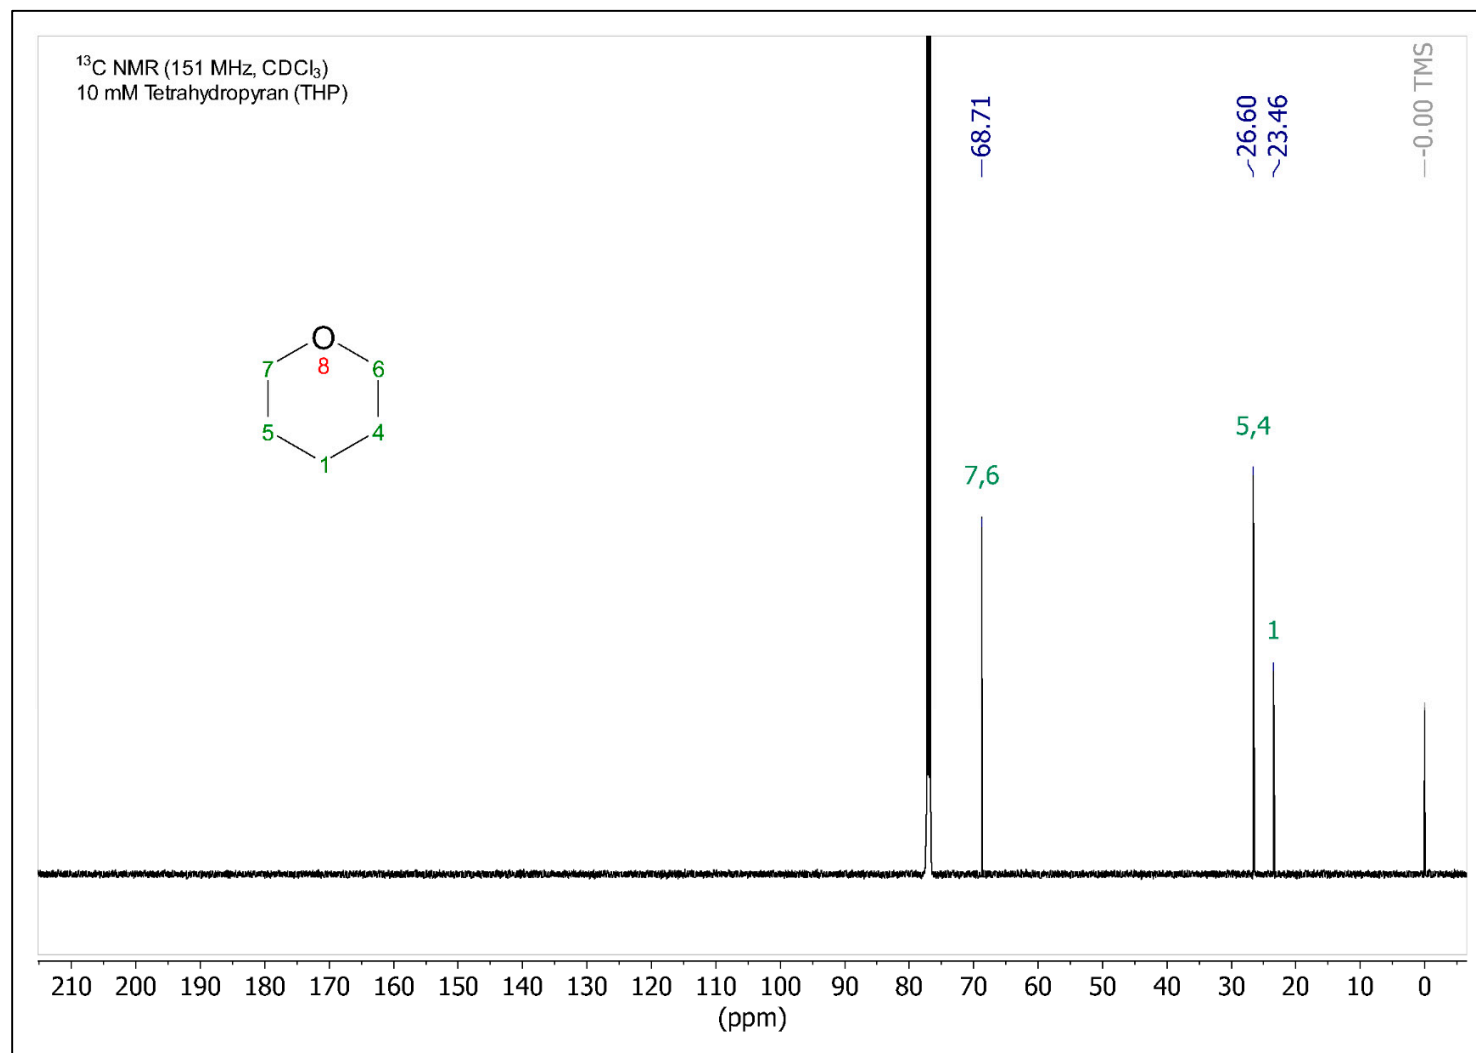

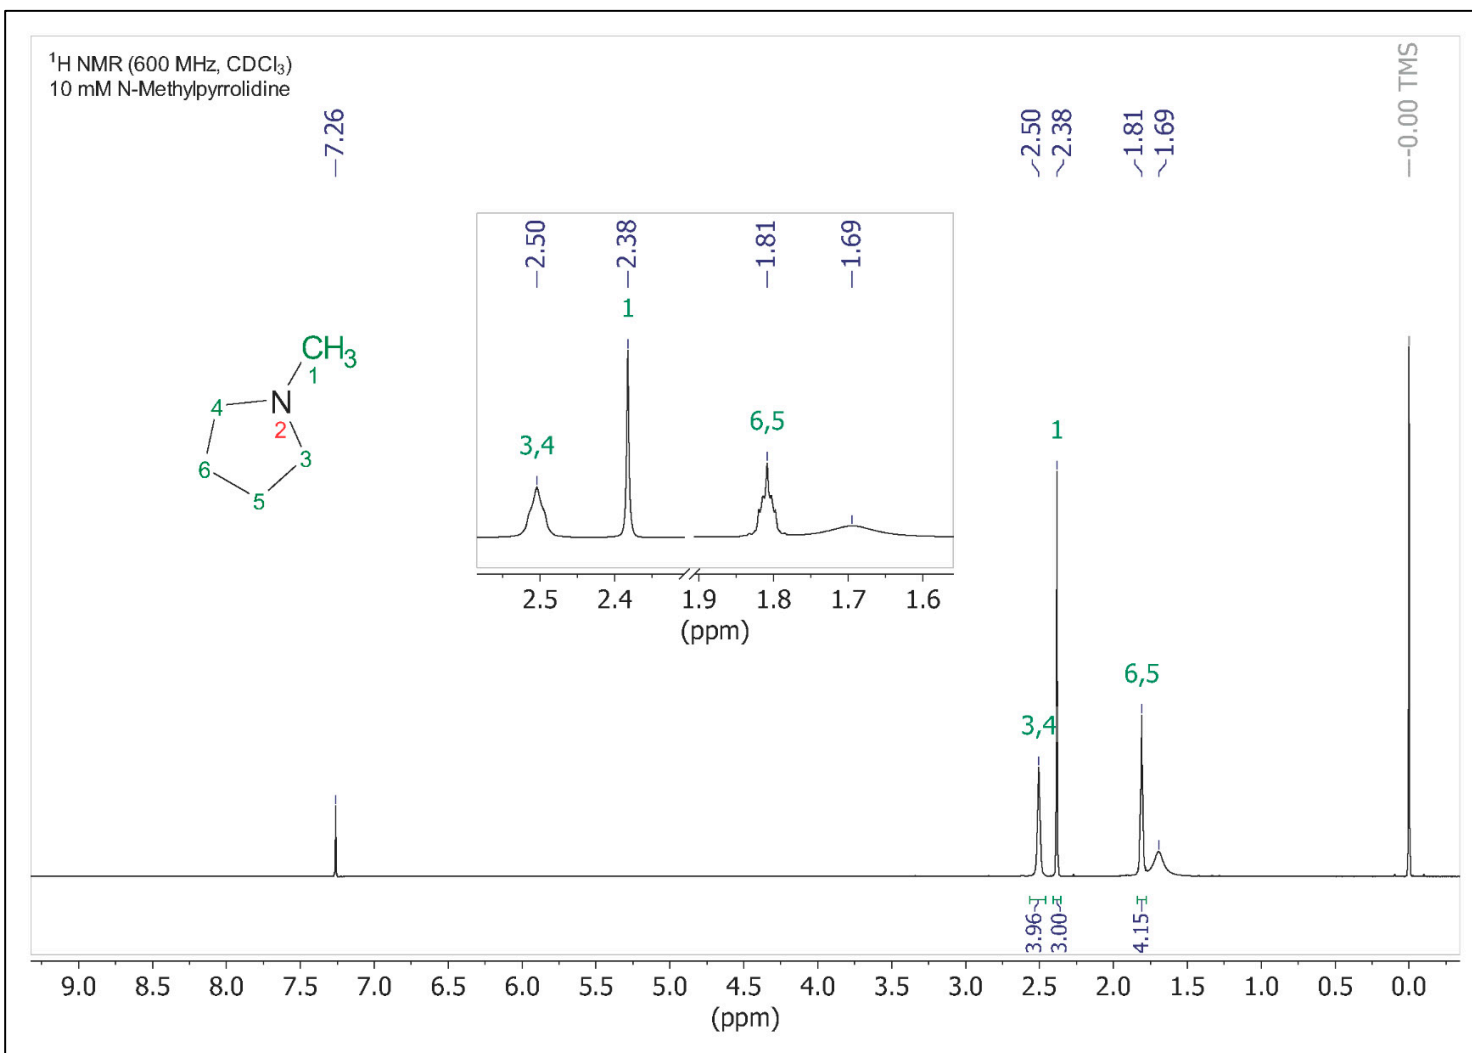

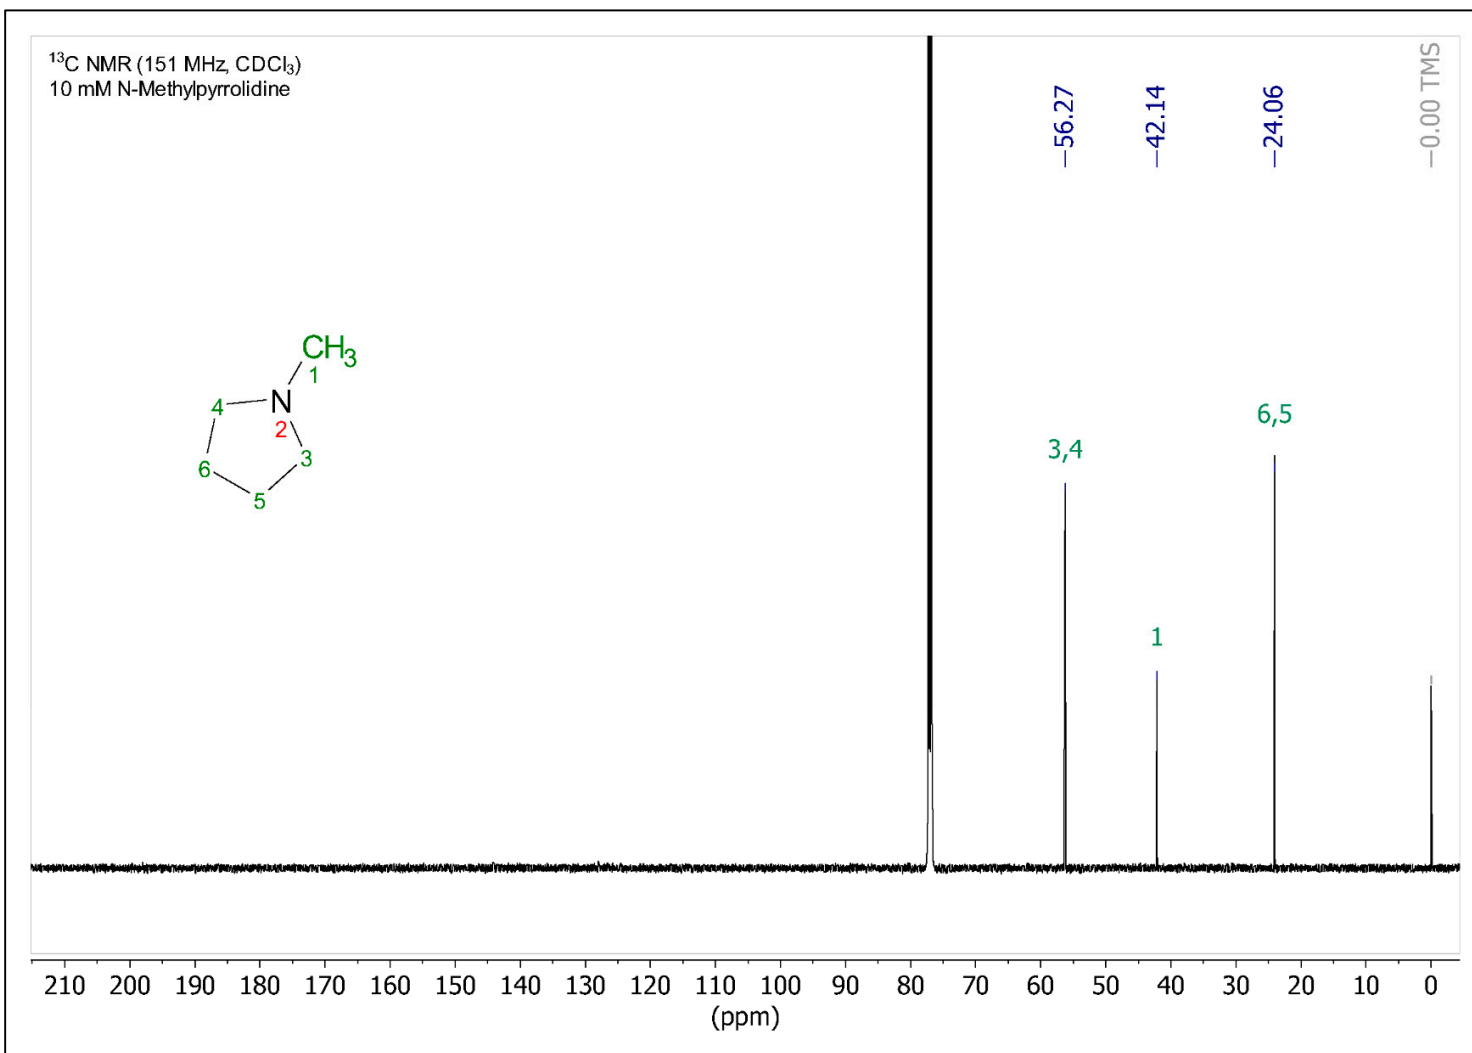

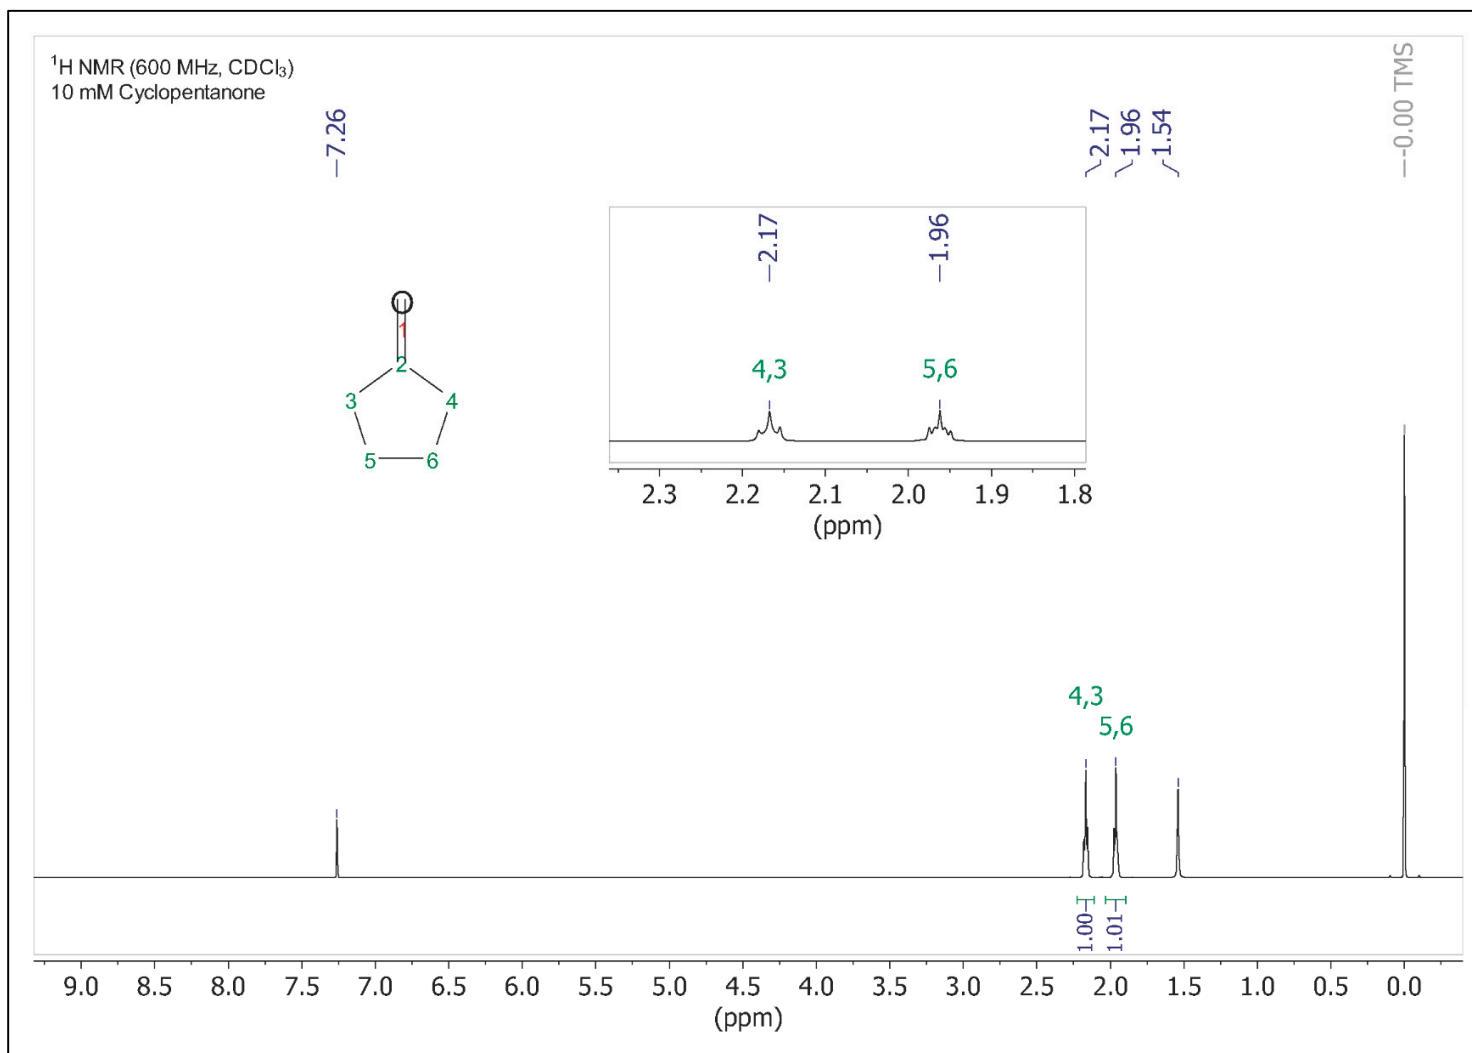

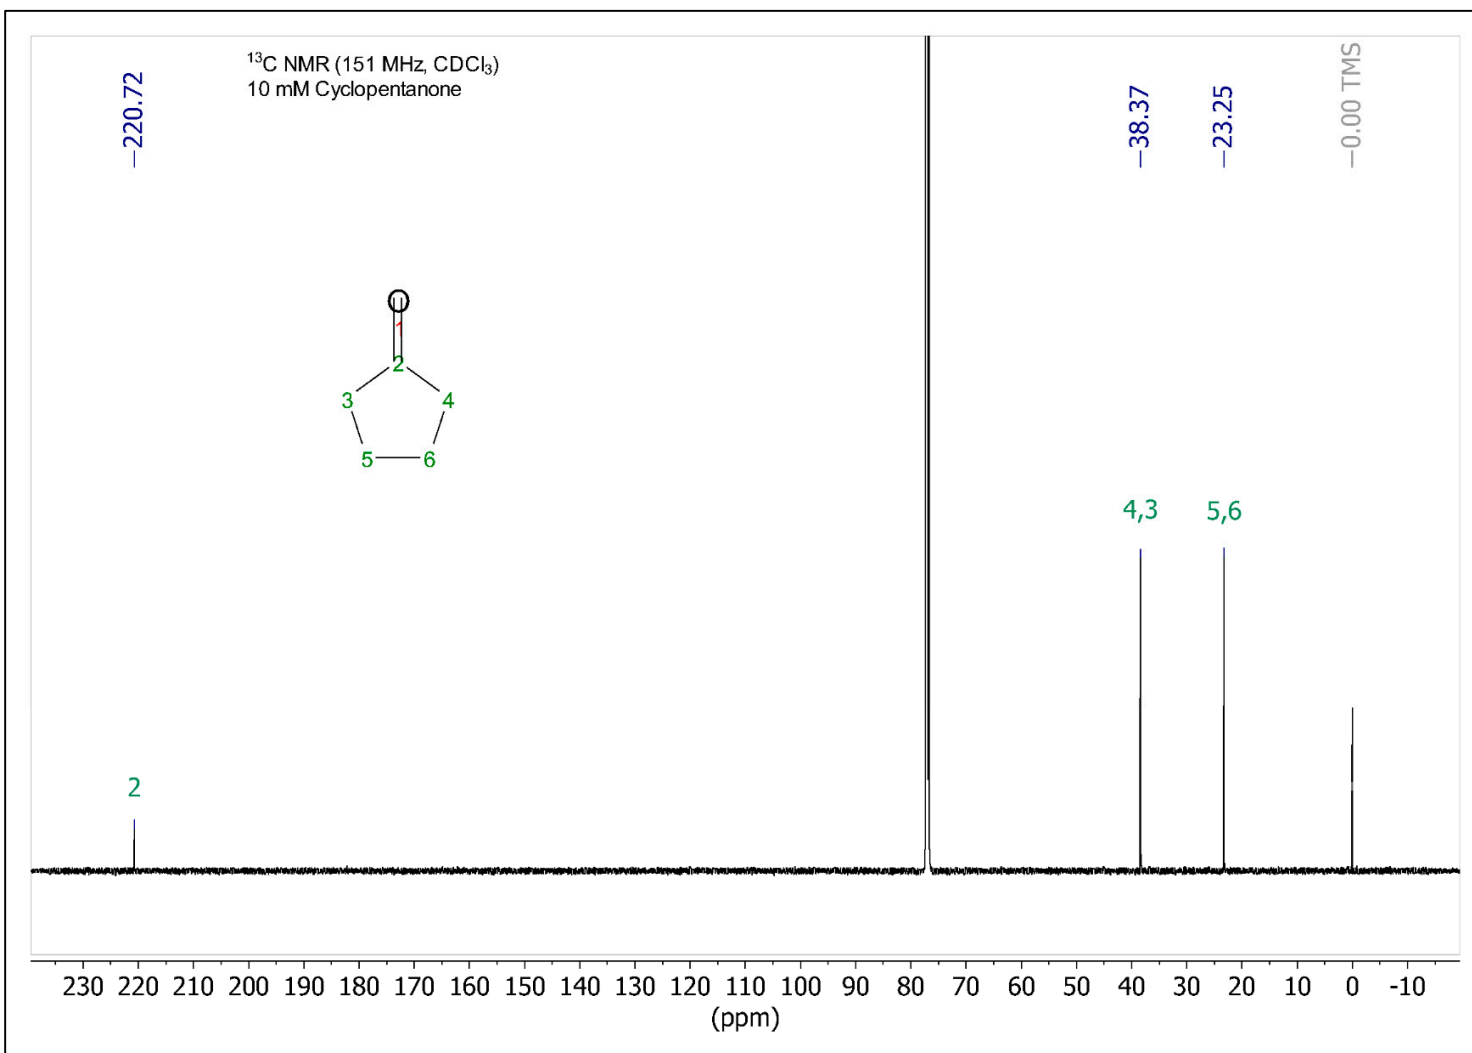



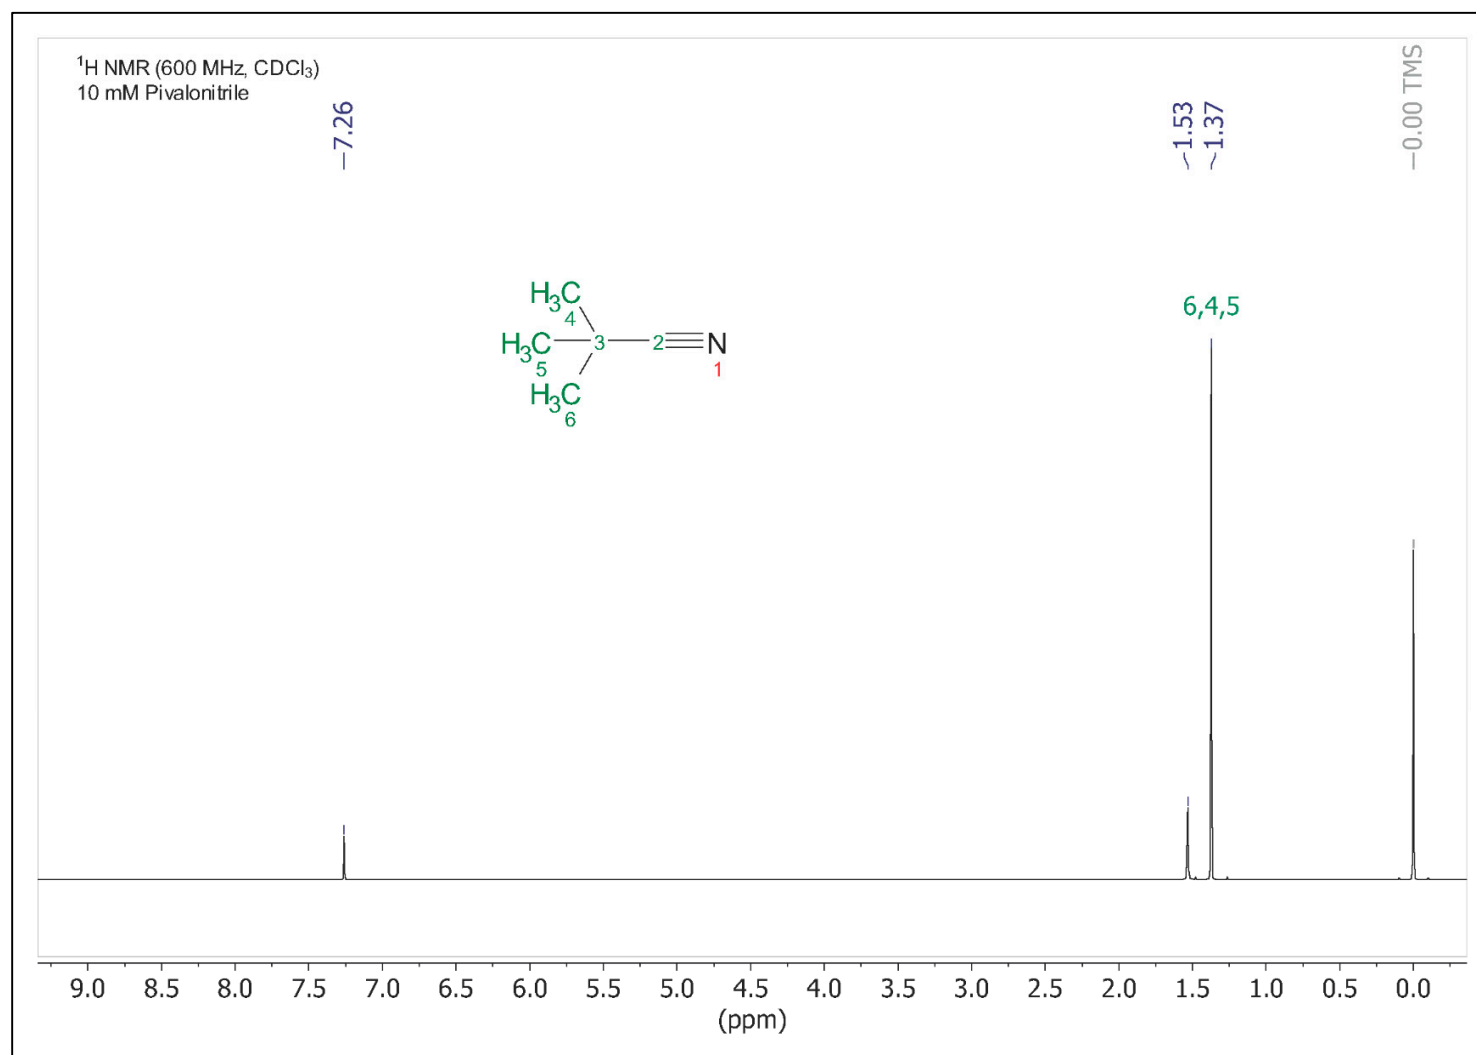

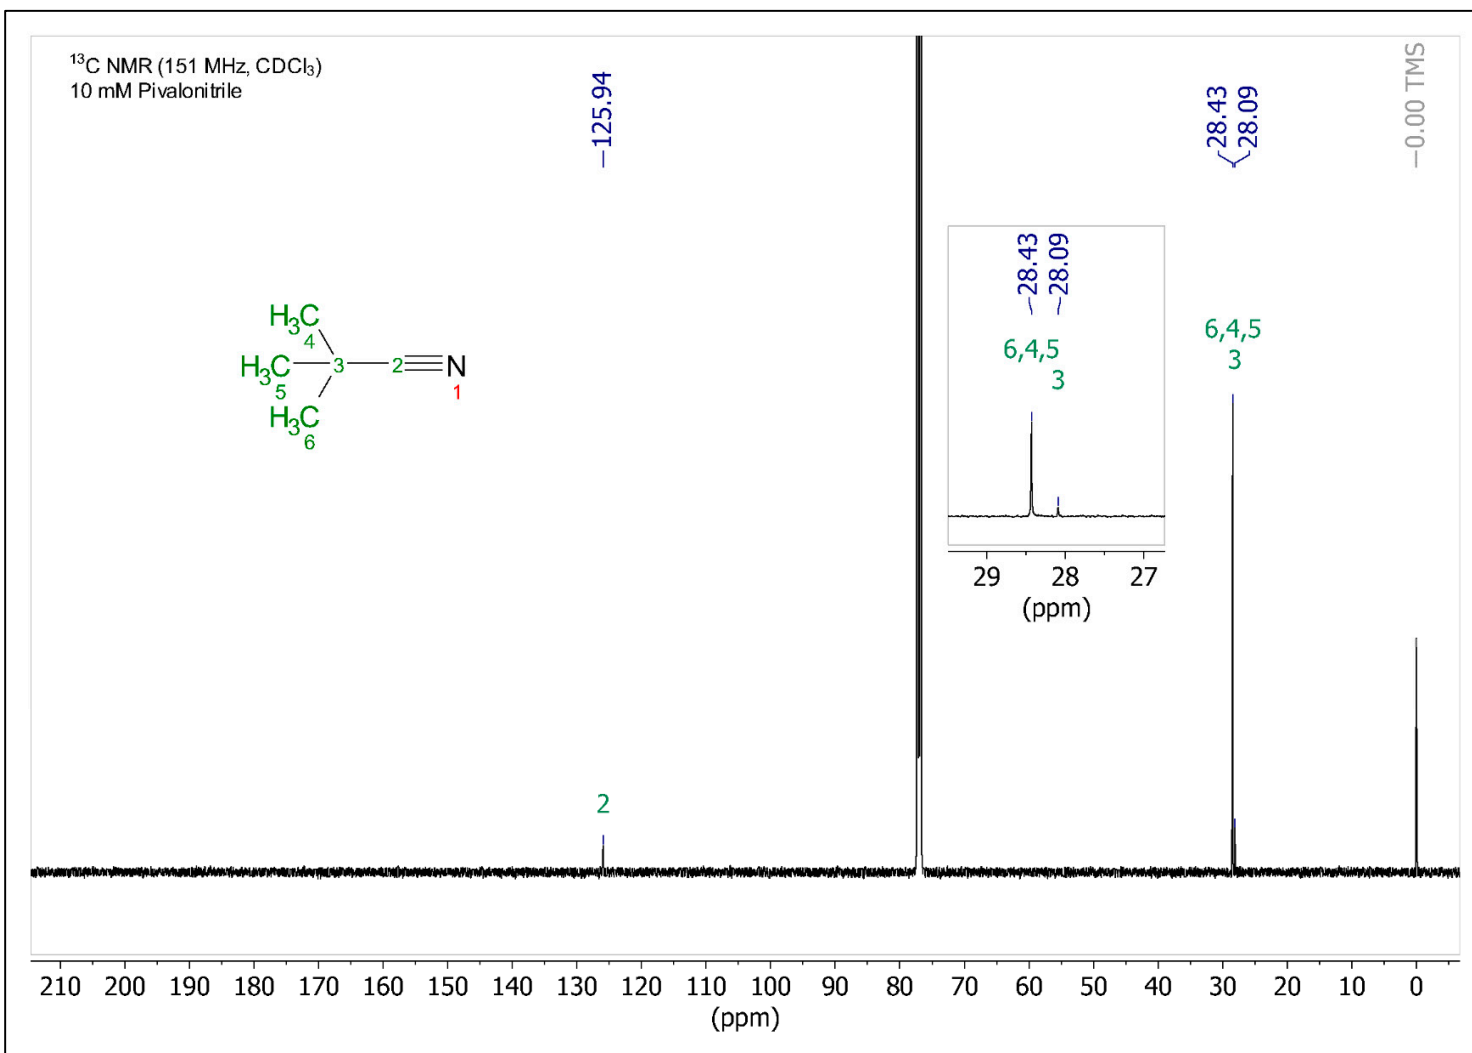

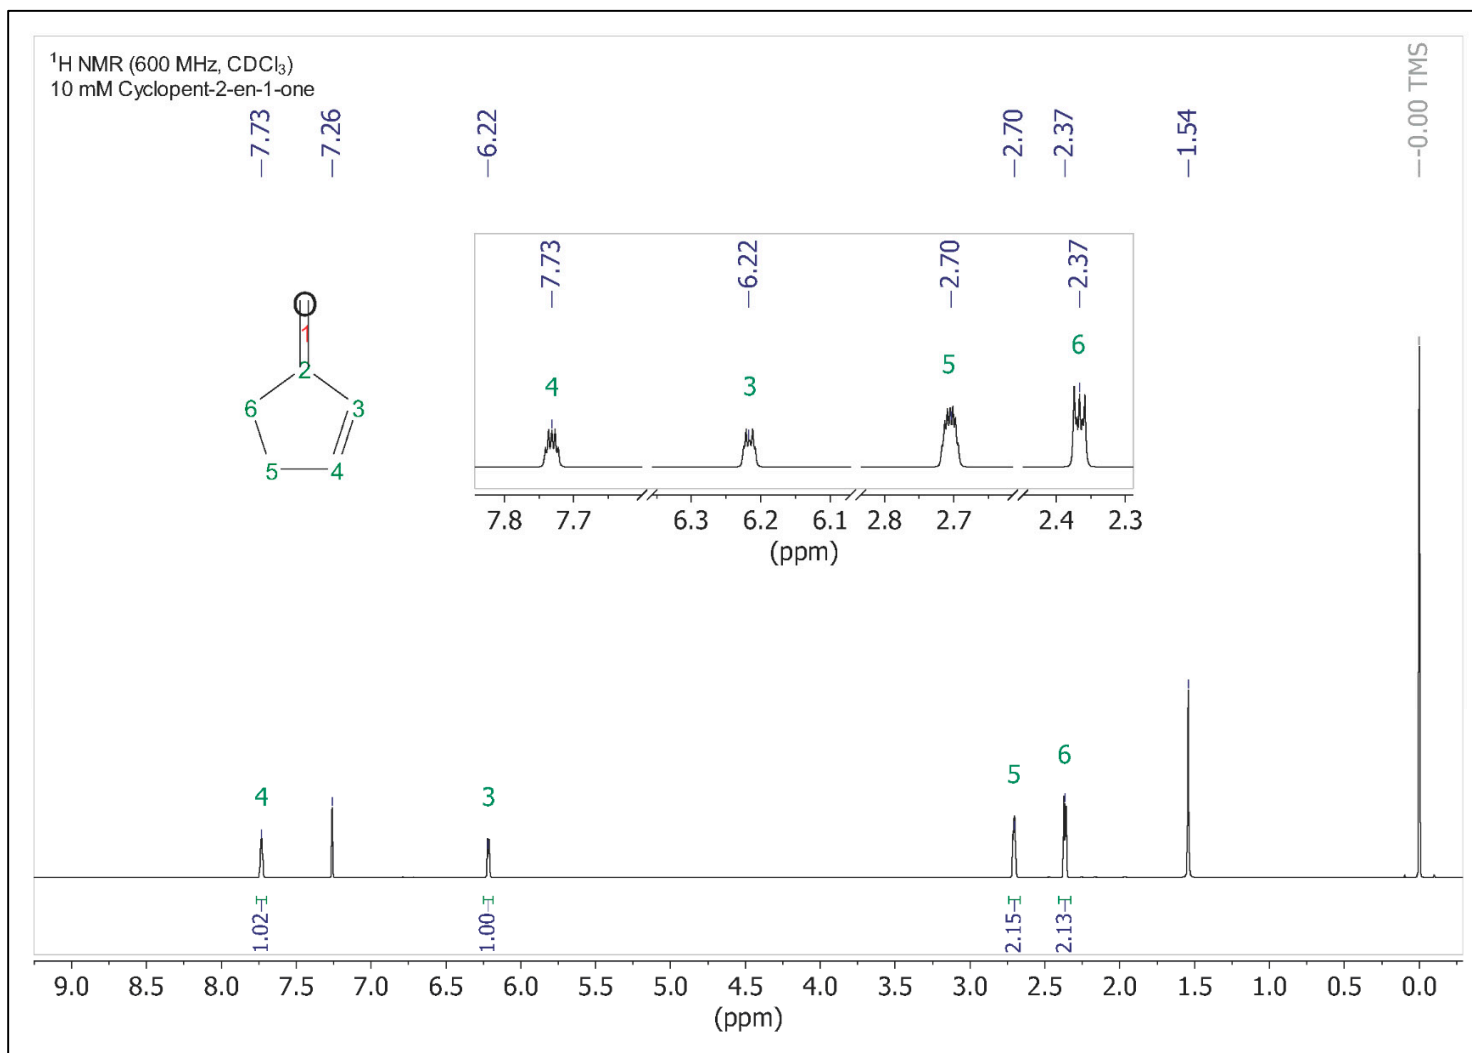

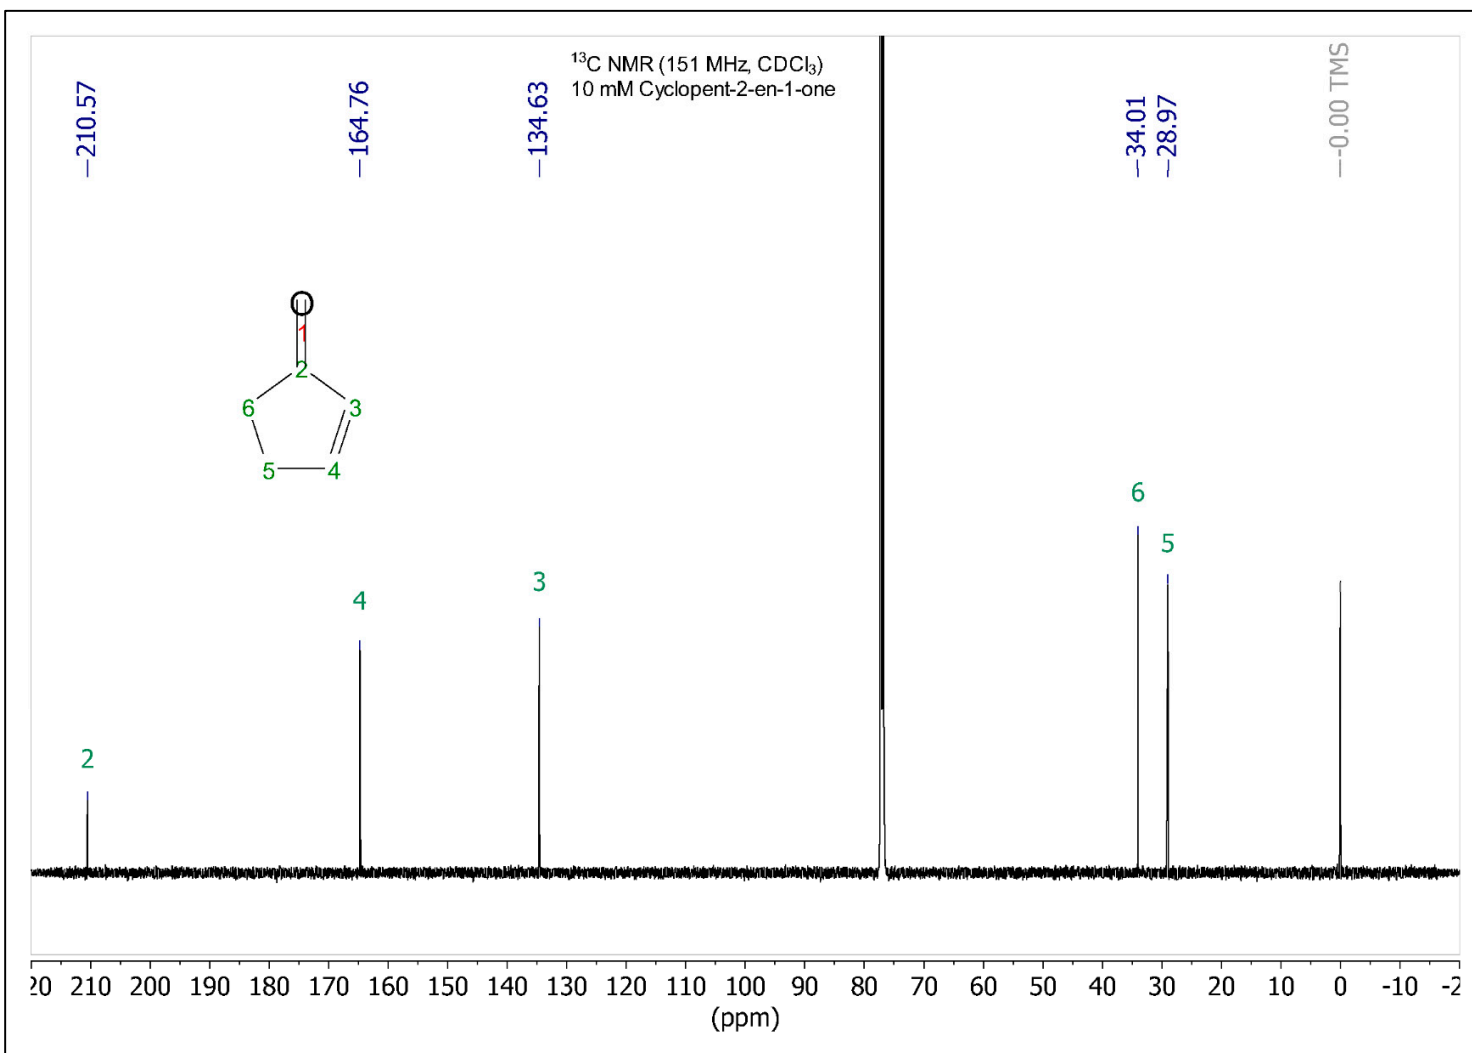

$^1\text{H} / ^1\text{H}$  COSY NMR (600 / 600 MHz,  $\text{CDCl}_3$ )  
10 mM Cyclopent-2-en-1-one

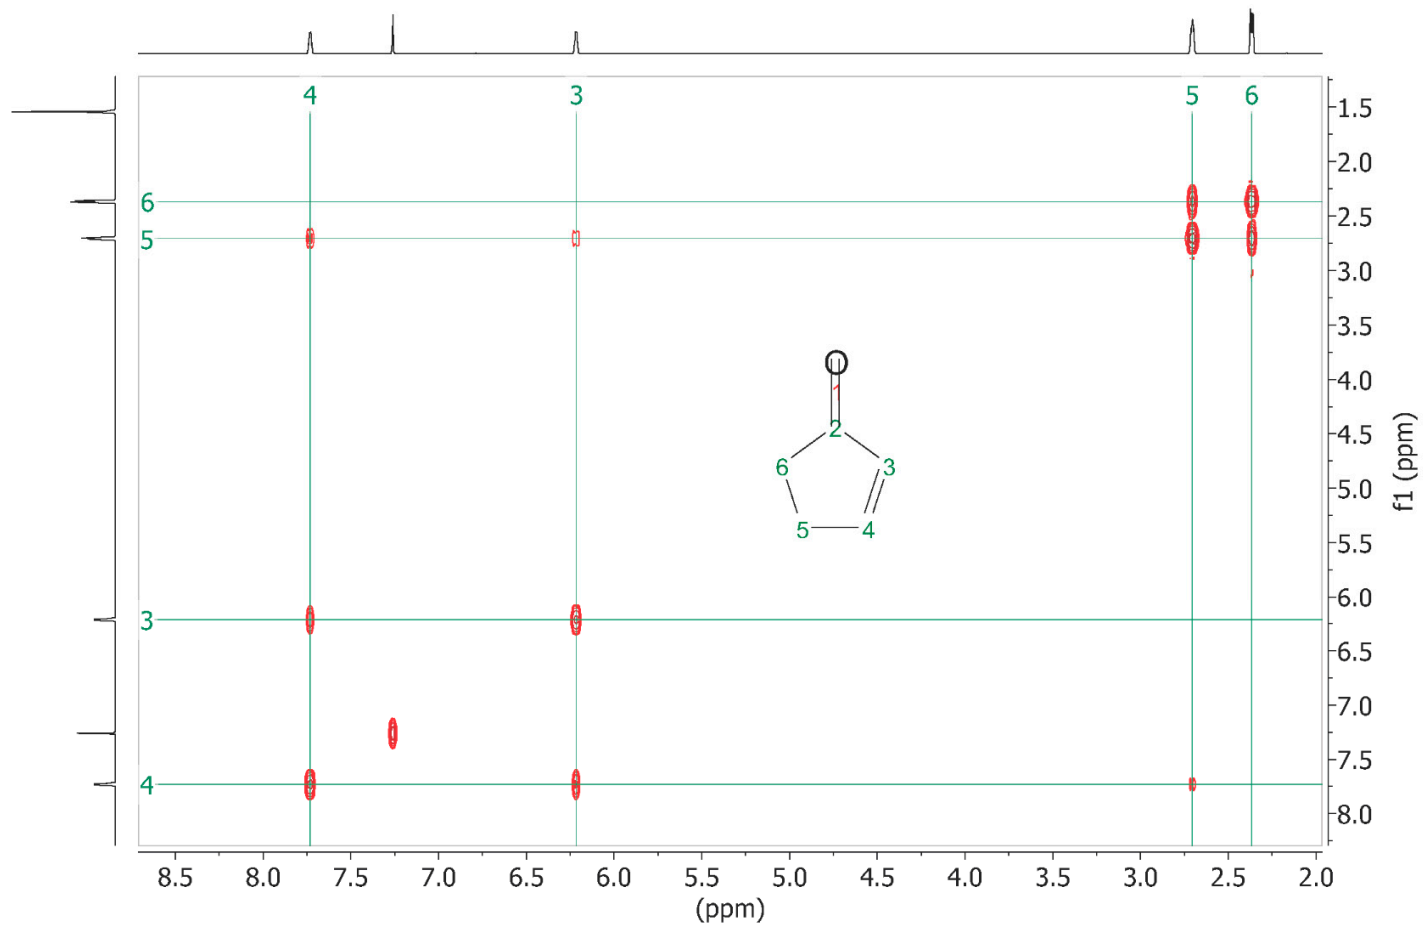

$^1\text{H} / ^{13}\text{C}$  HSQC NMR (600 / 151 MHz,  $\text{CDCl}_3$ )  
10 mM Cyclopent-2-en-1-one

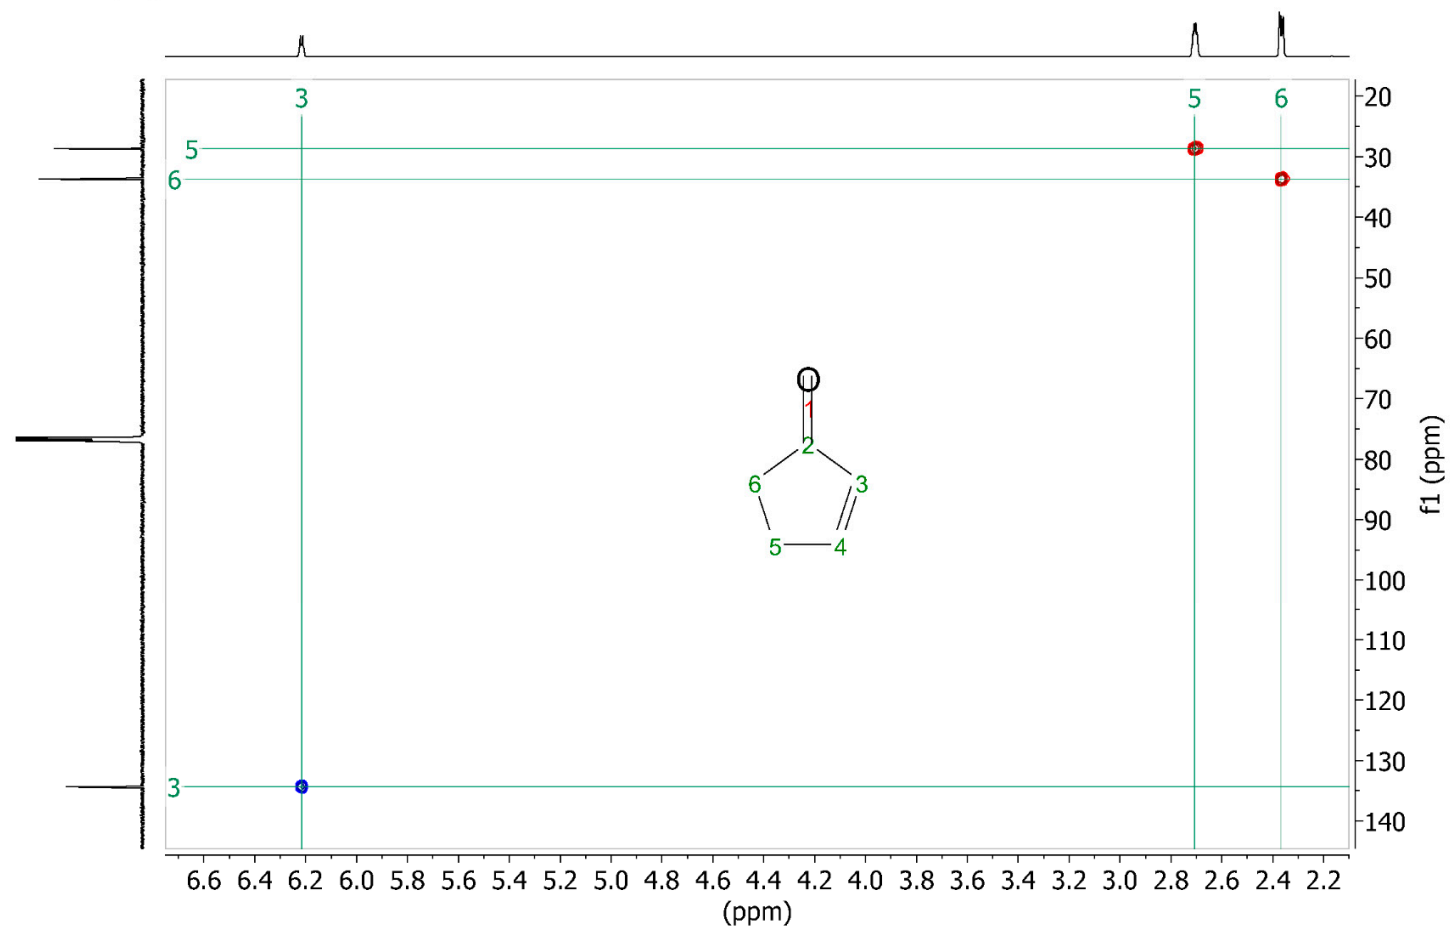

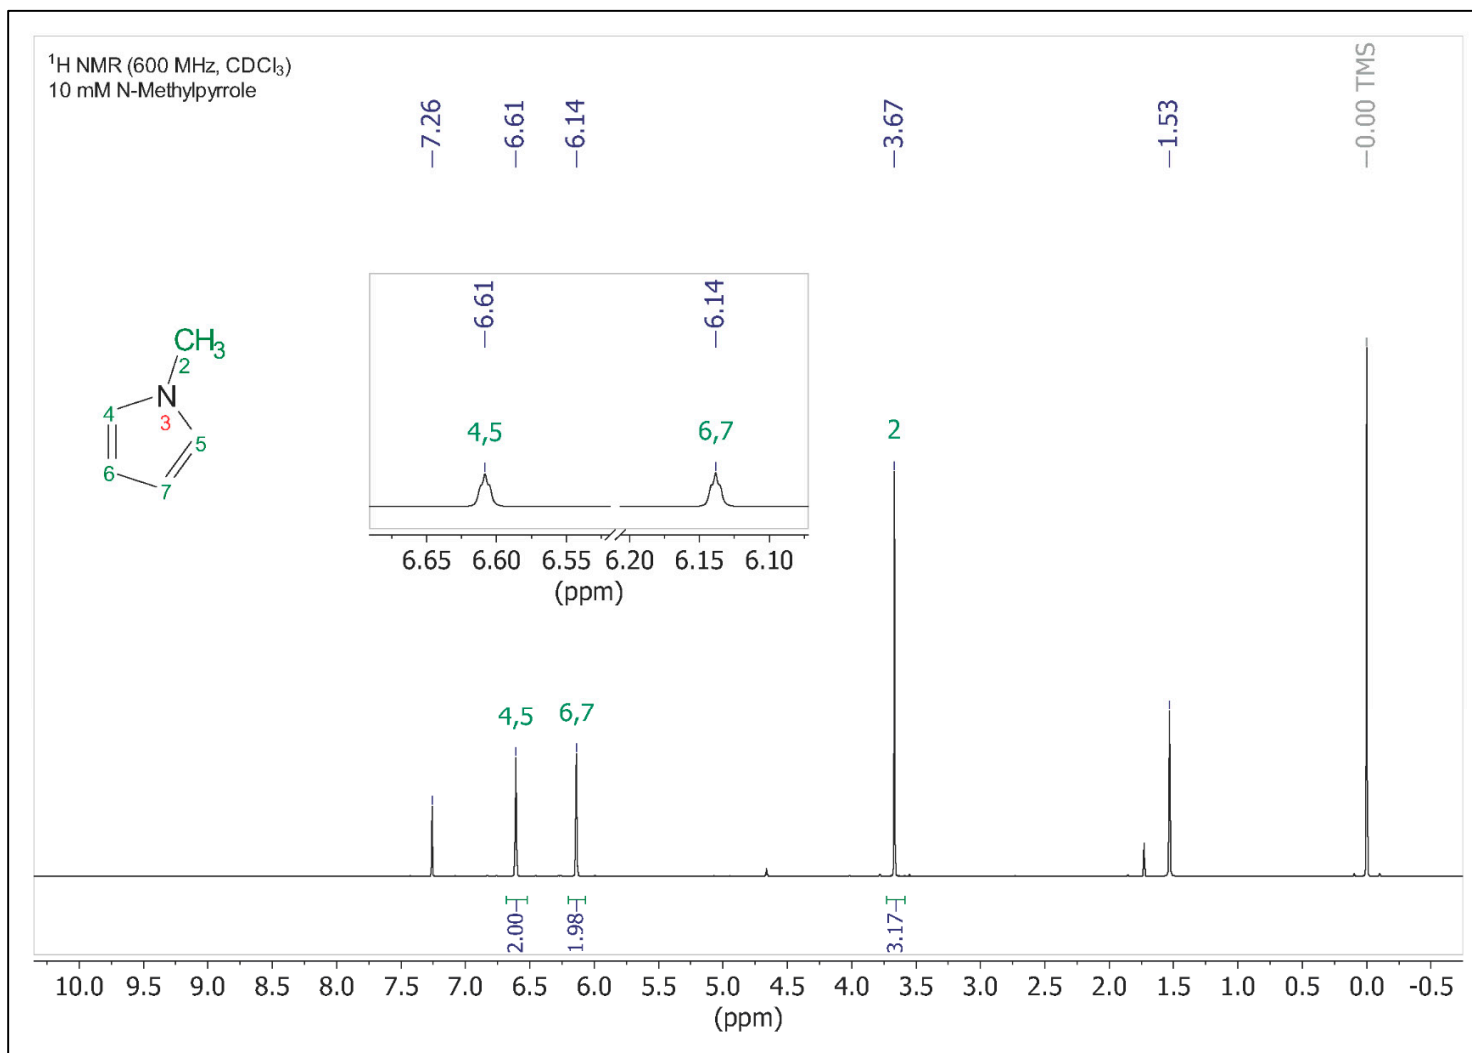

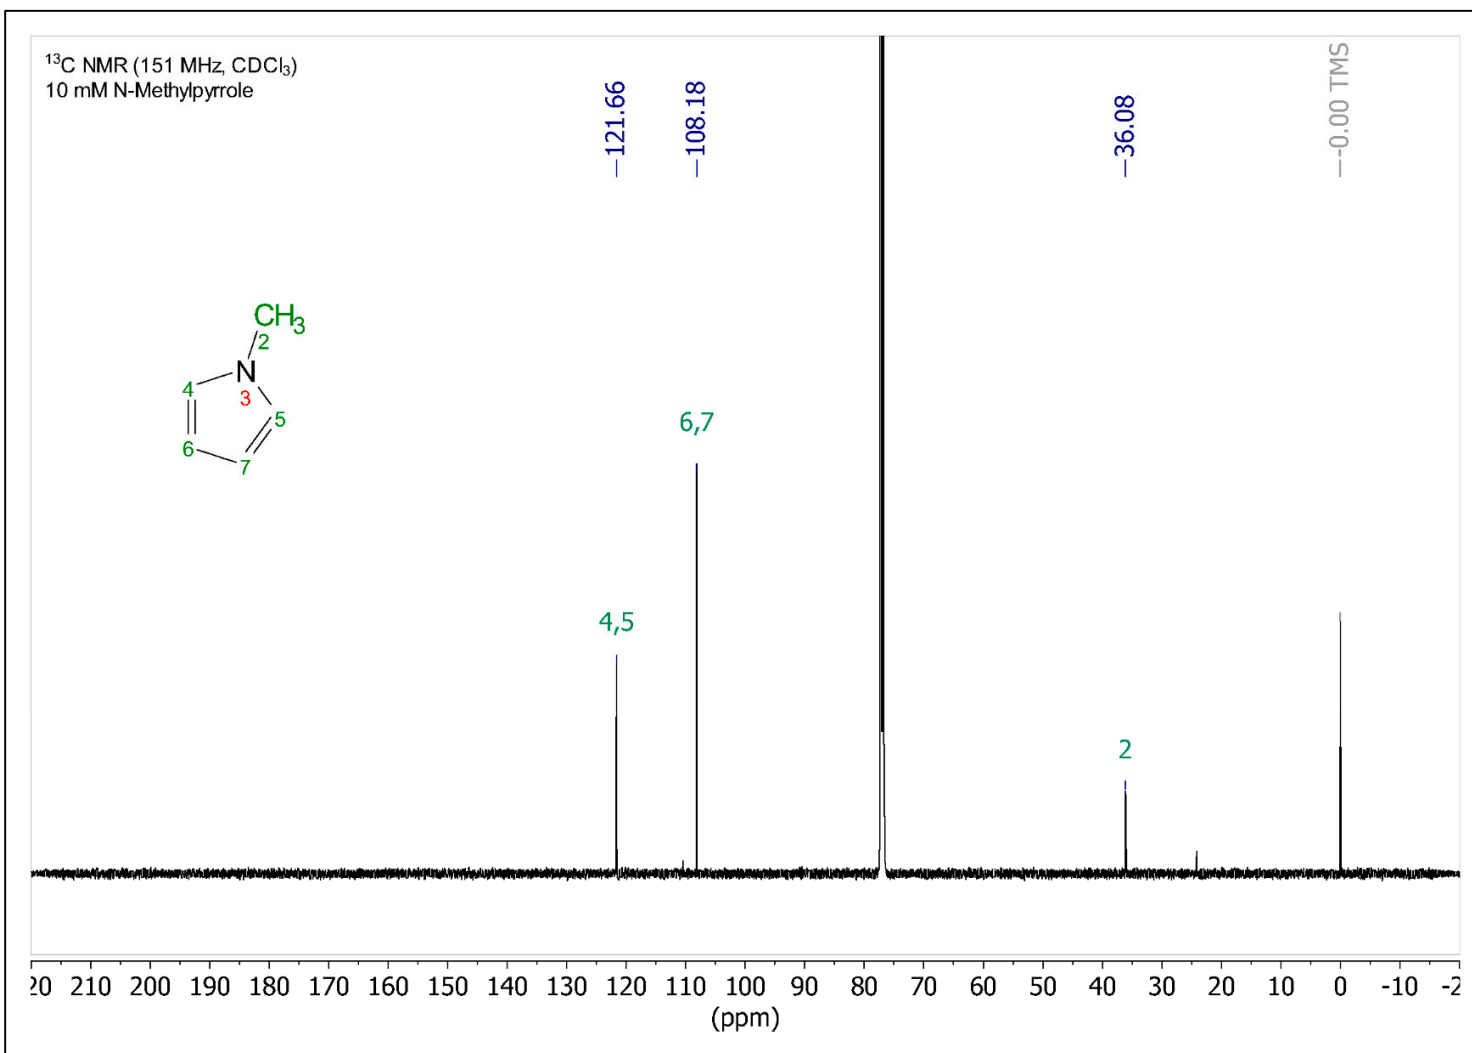



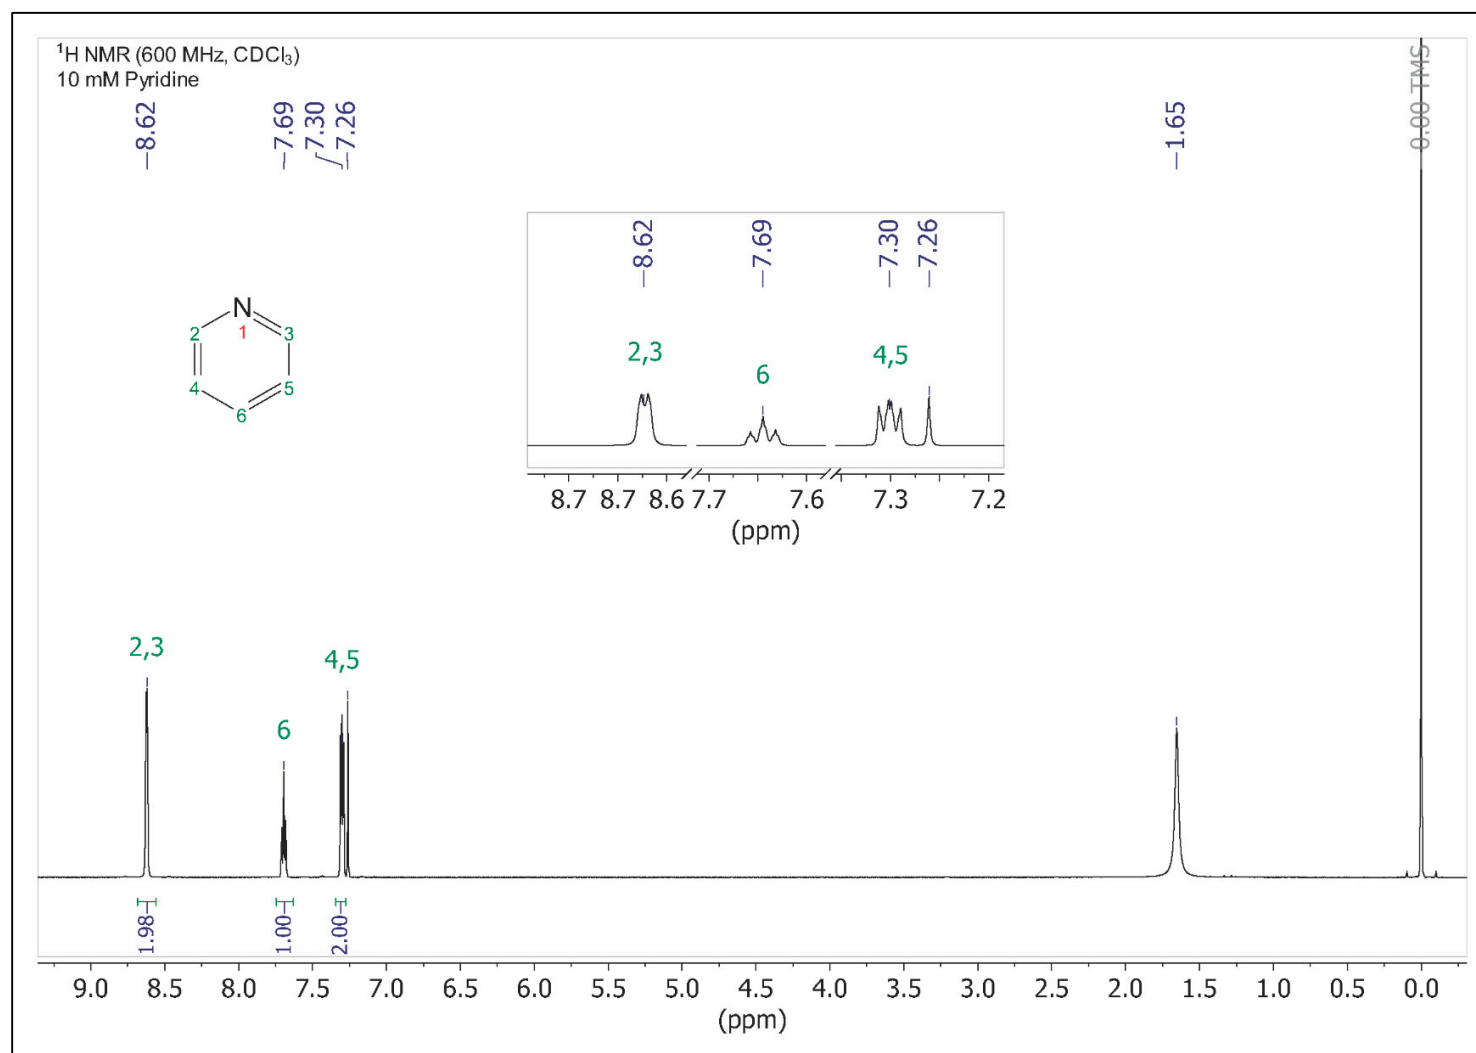

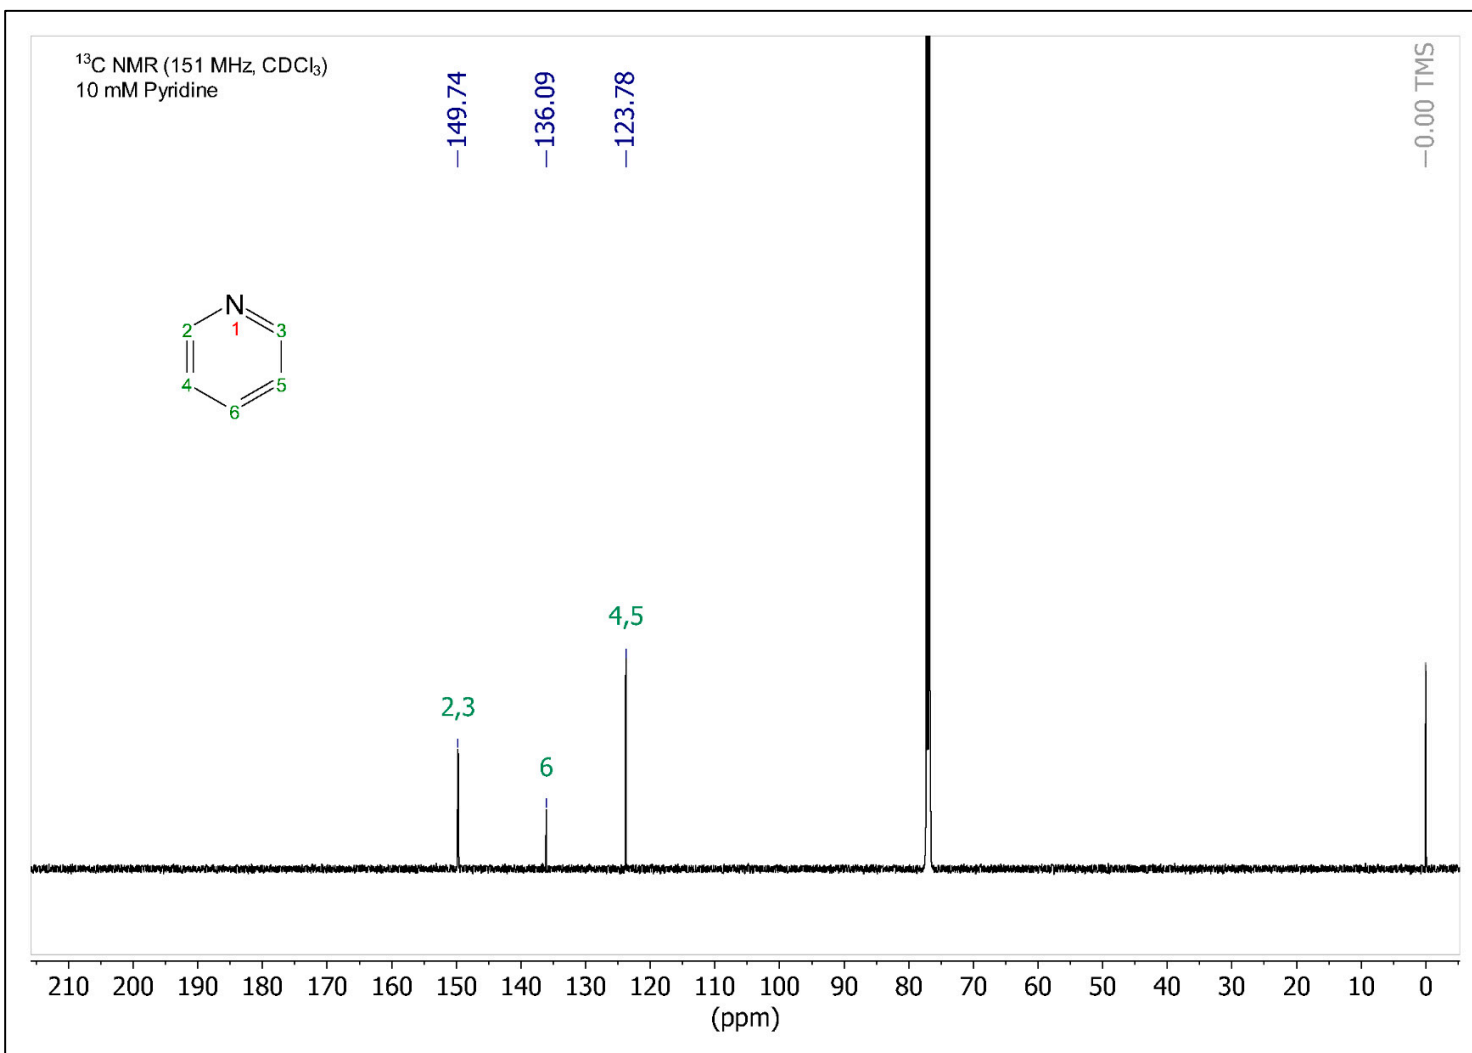

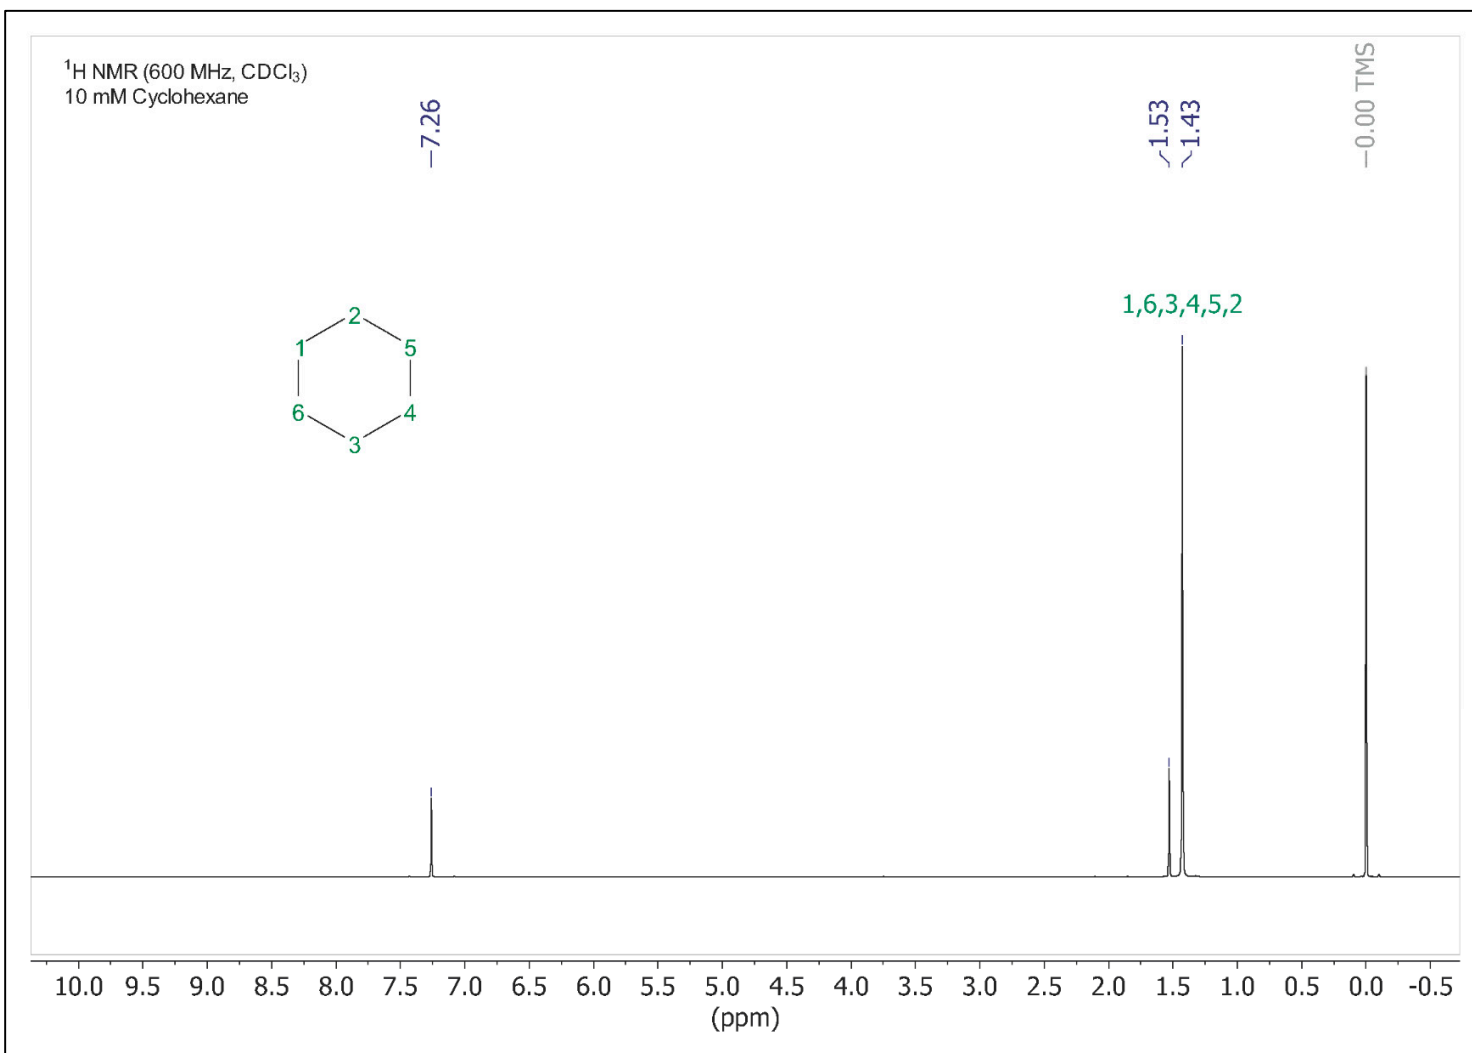

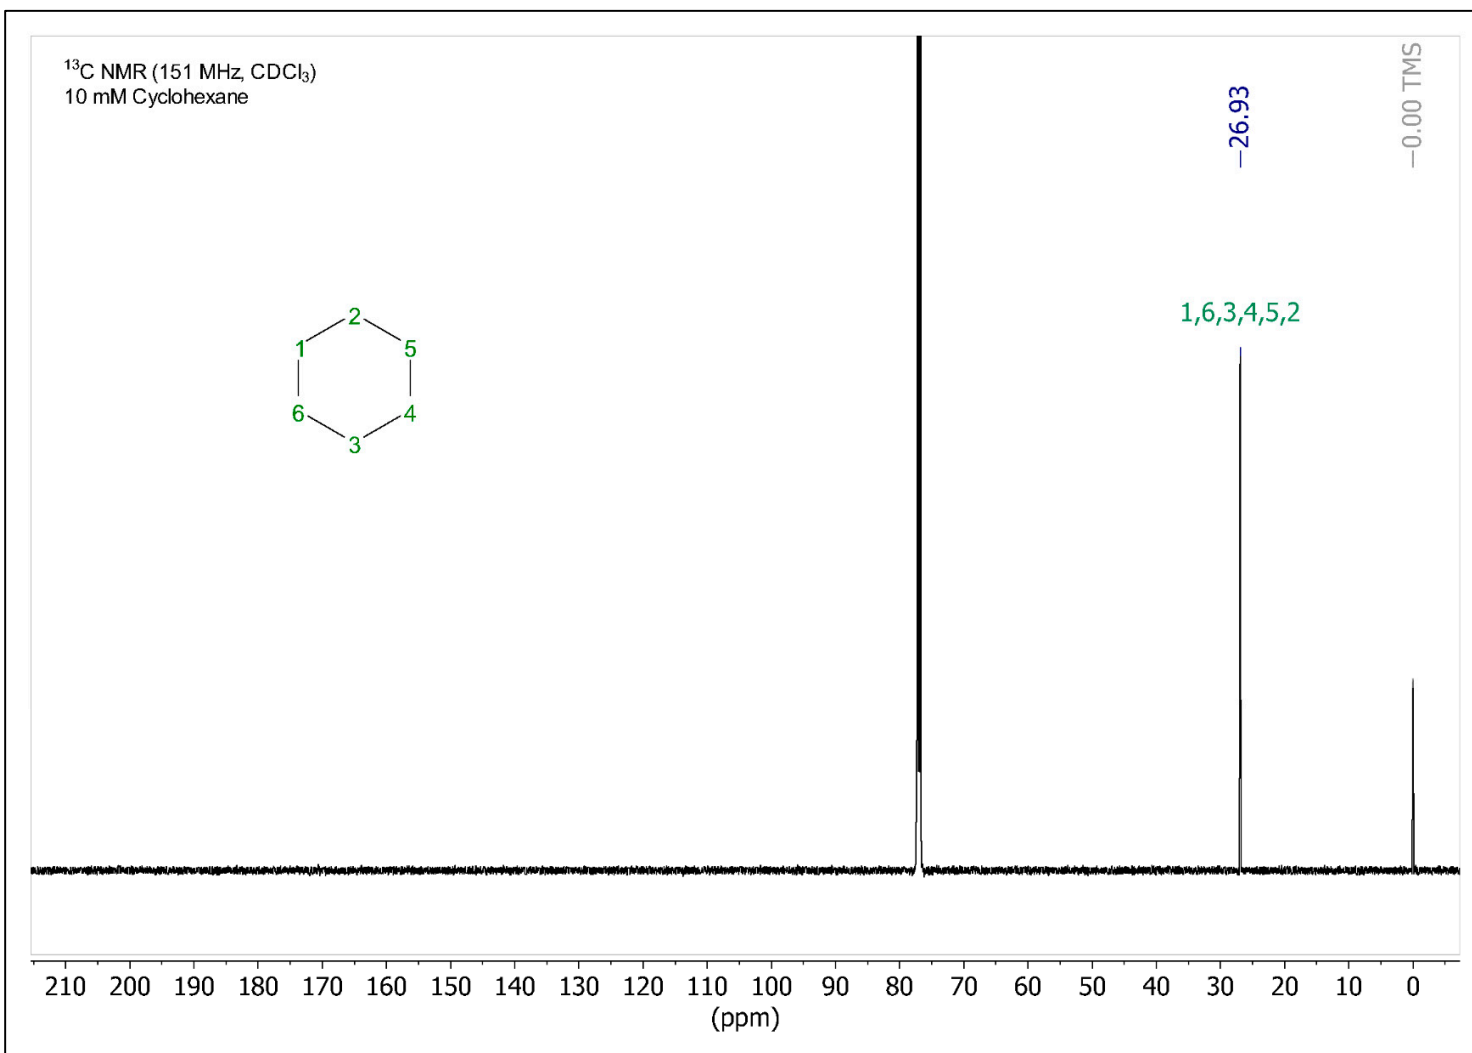

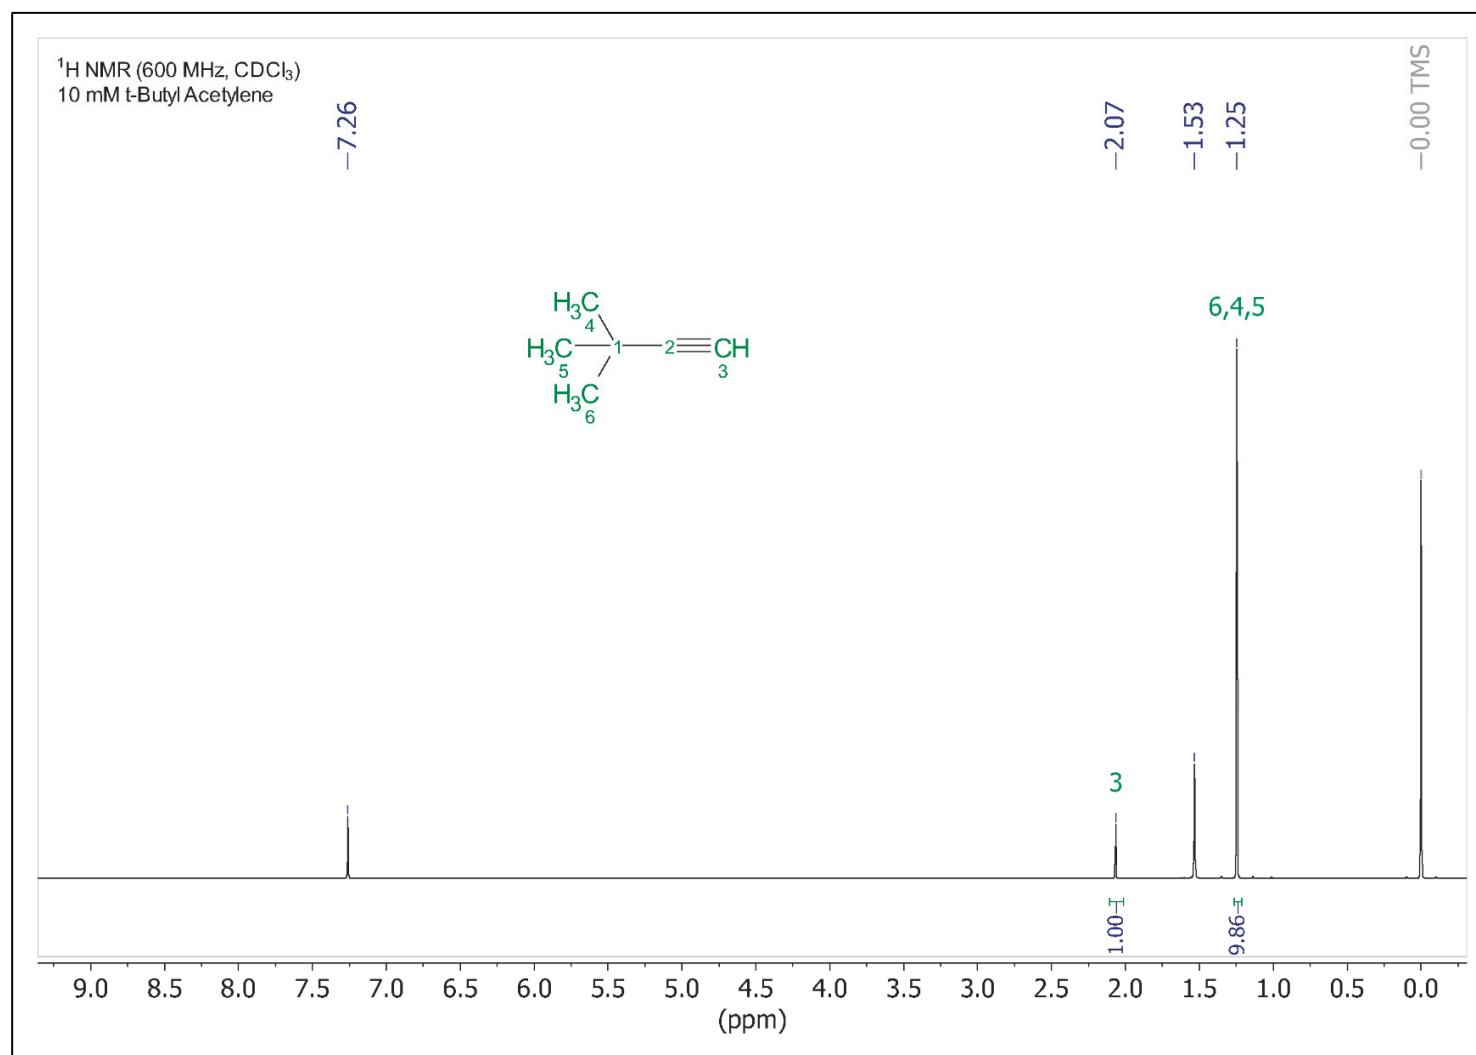

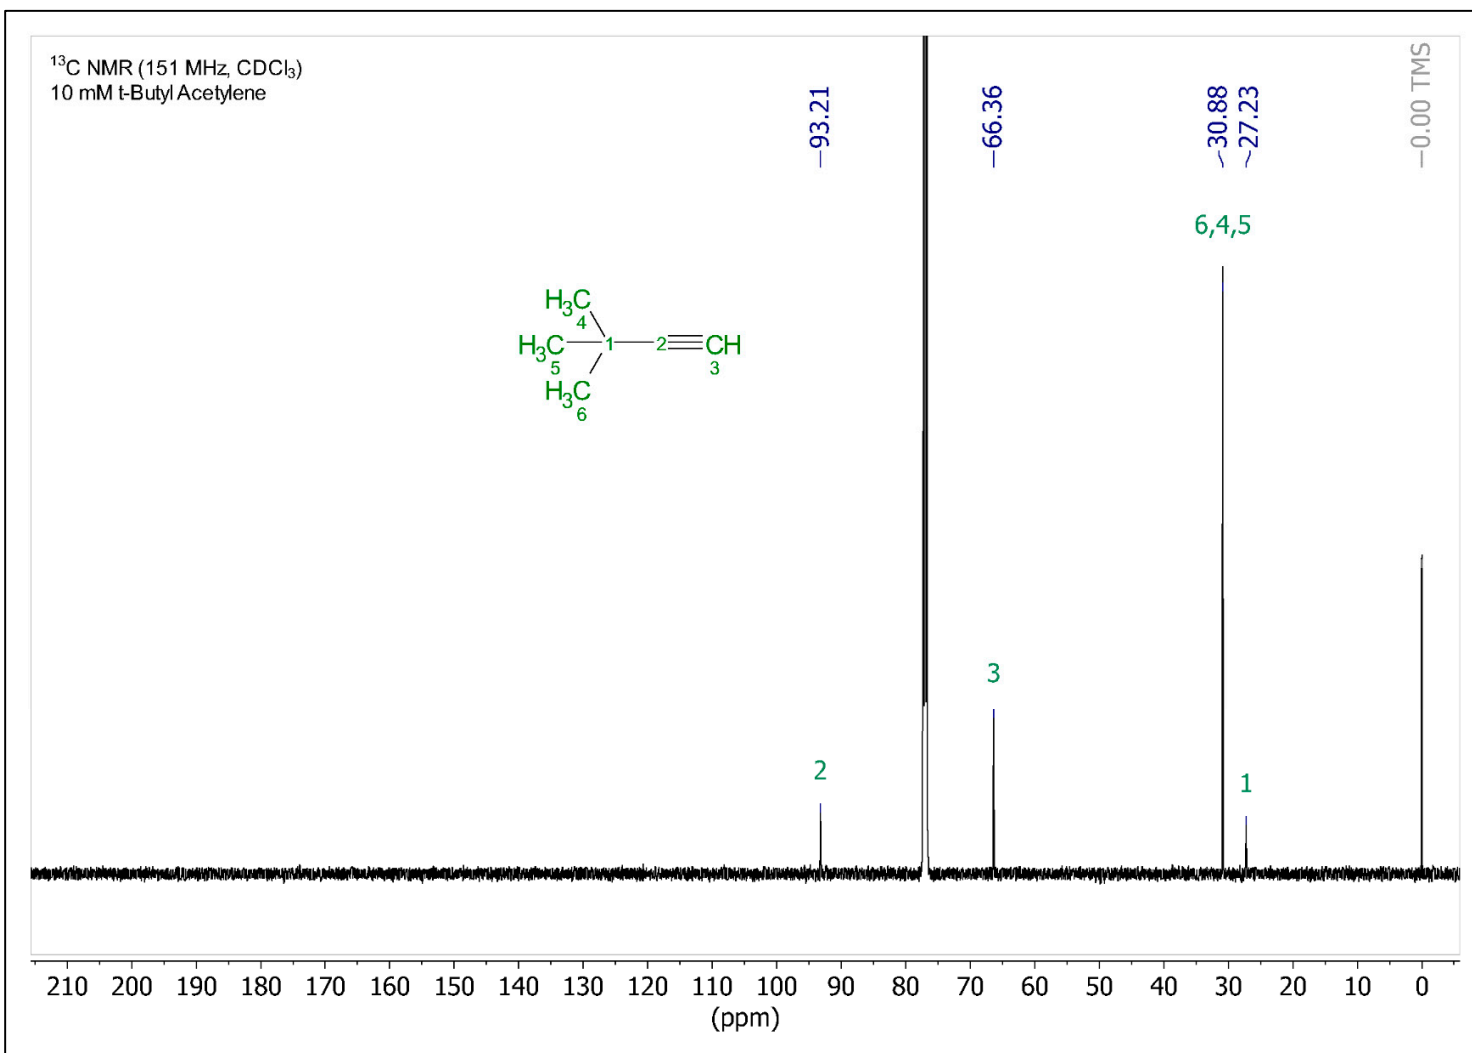

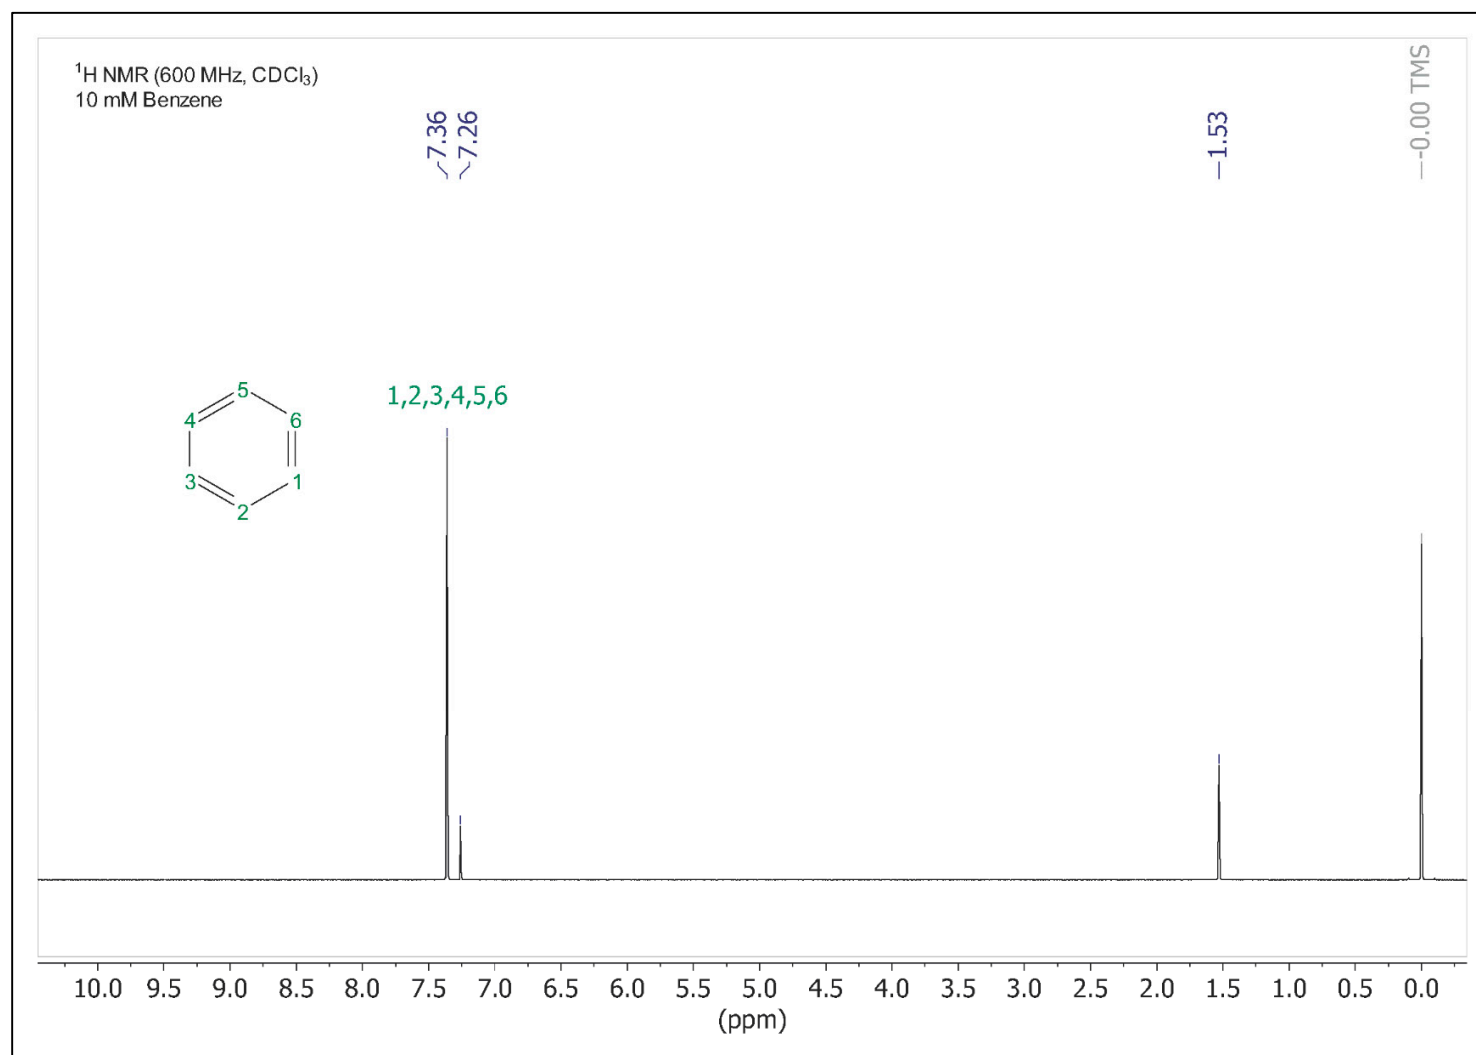

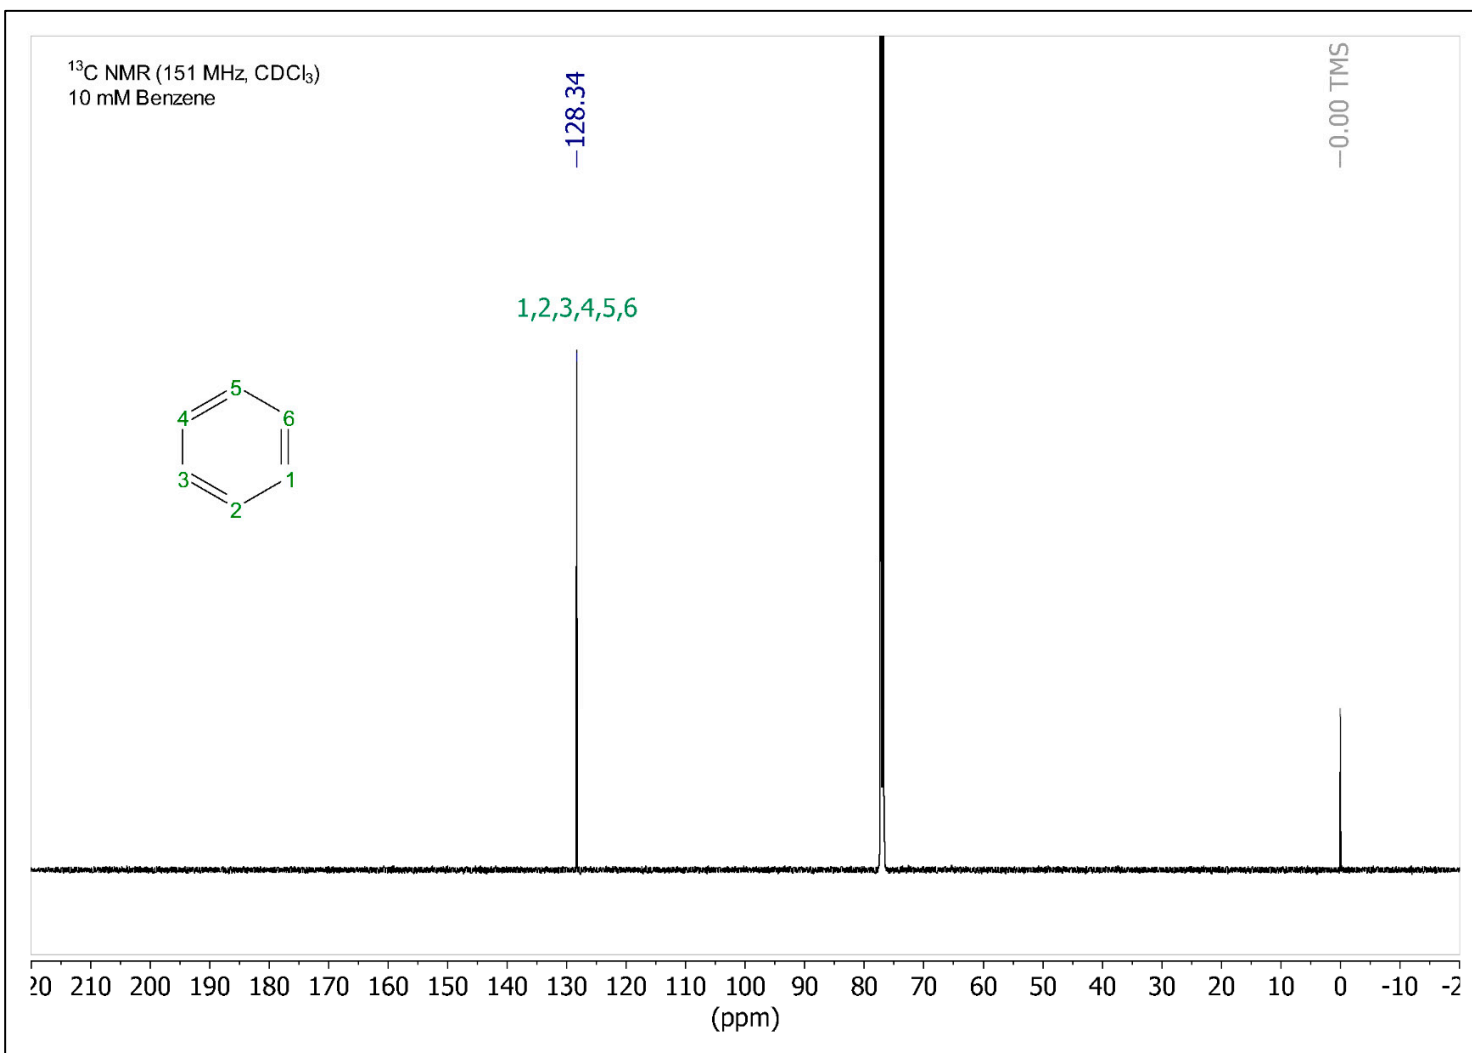



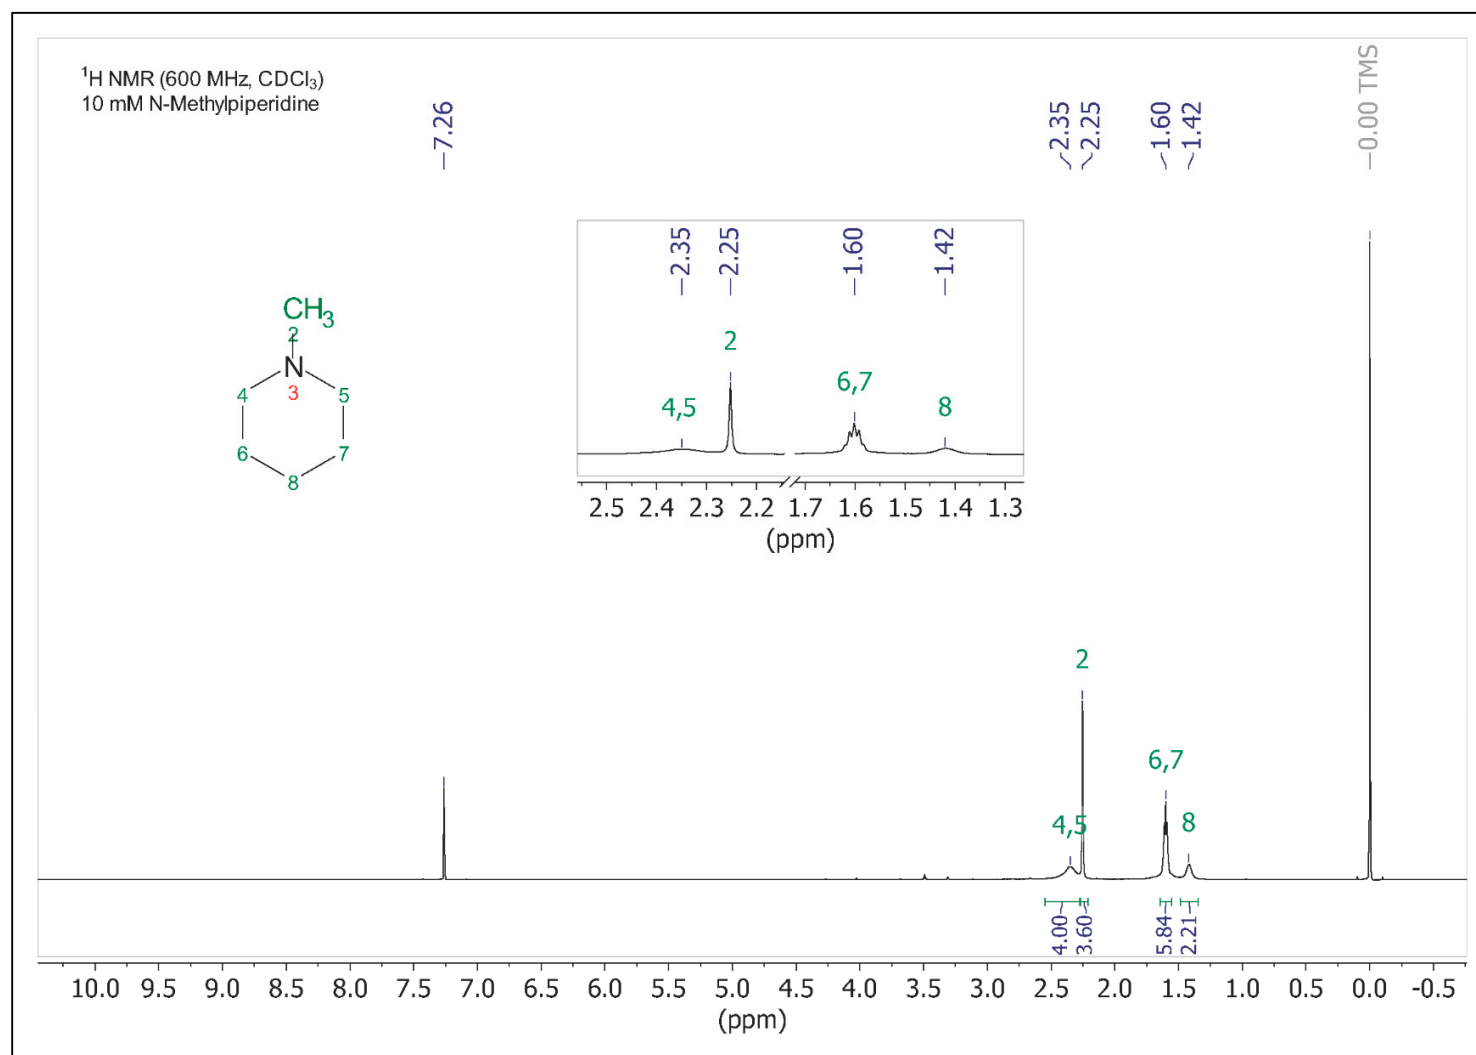

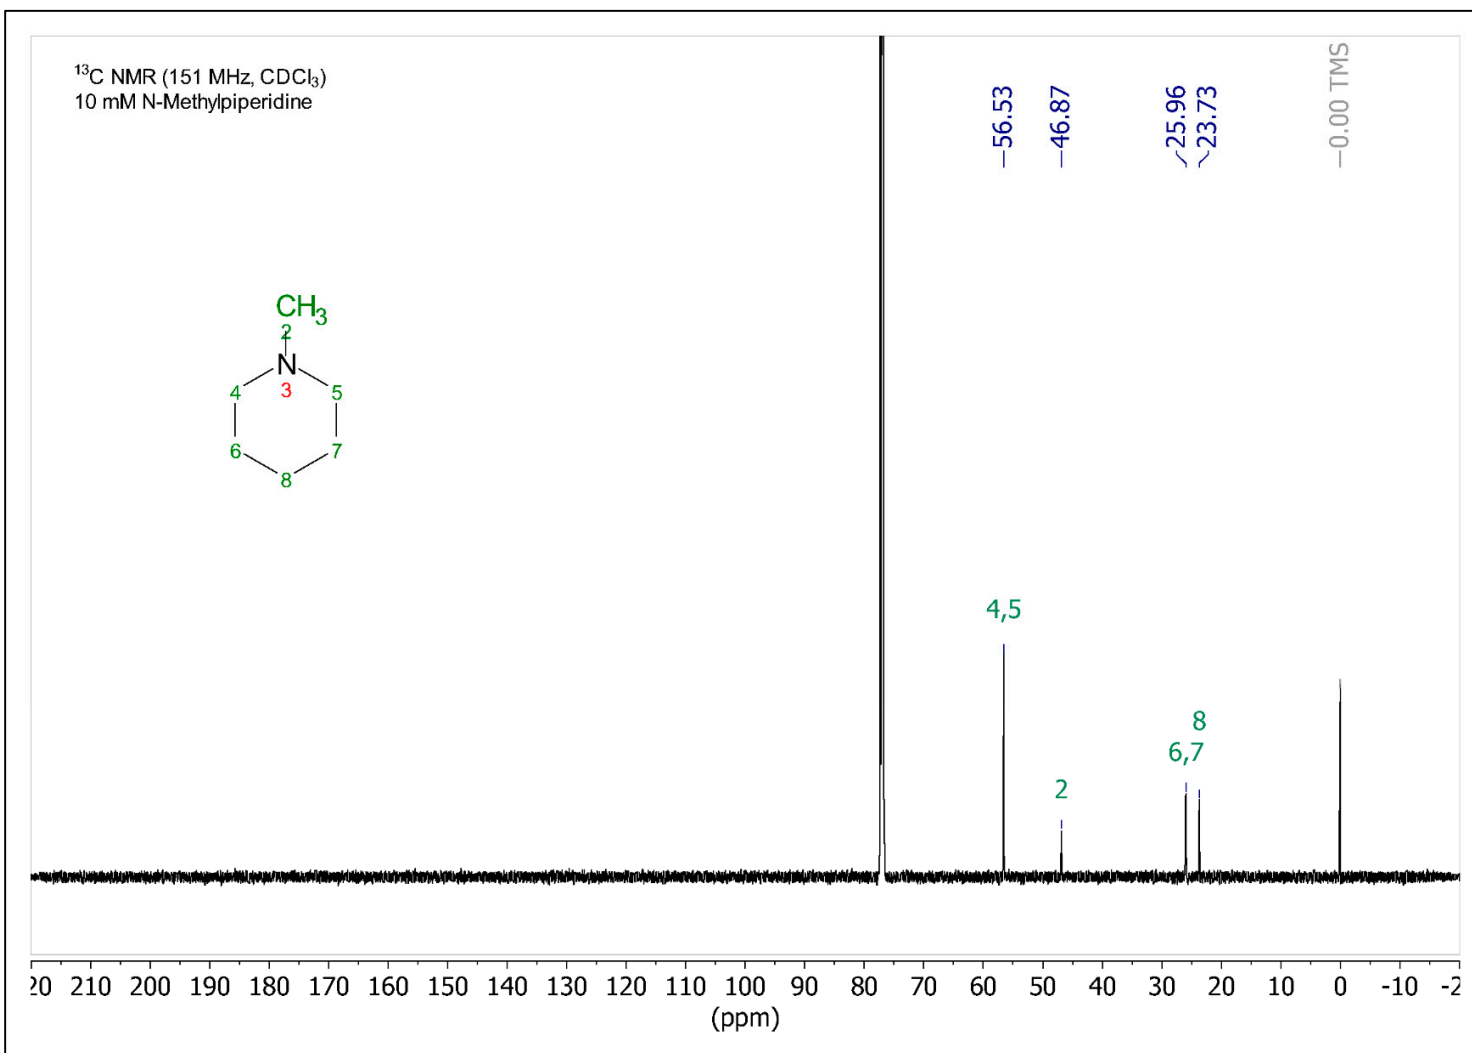

$^1\text{H} / ^{13}\text{C}$  HMBC NMR (600 / 151 MHz,  $\text{CDCl}_3$ )  
10 mM N-Methylpiperidine

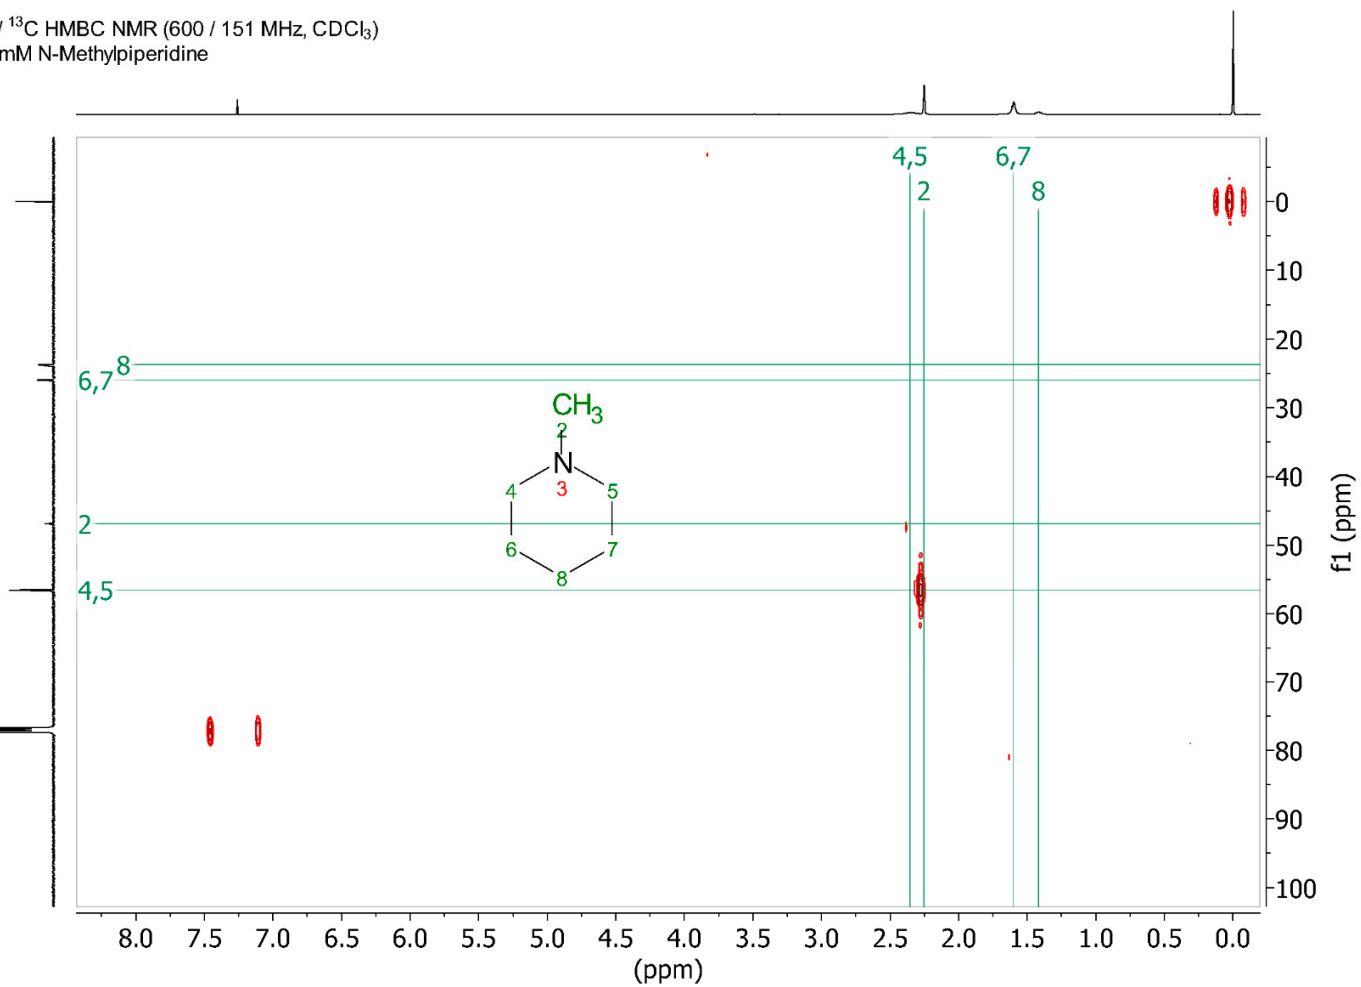

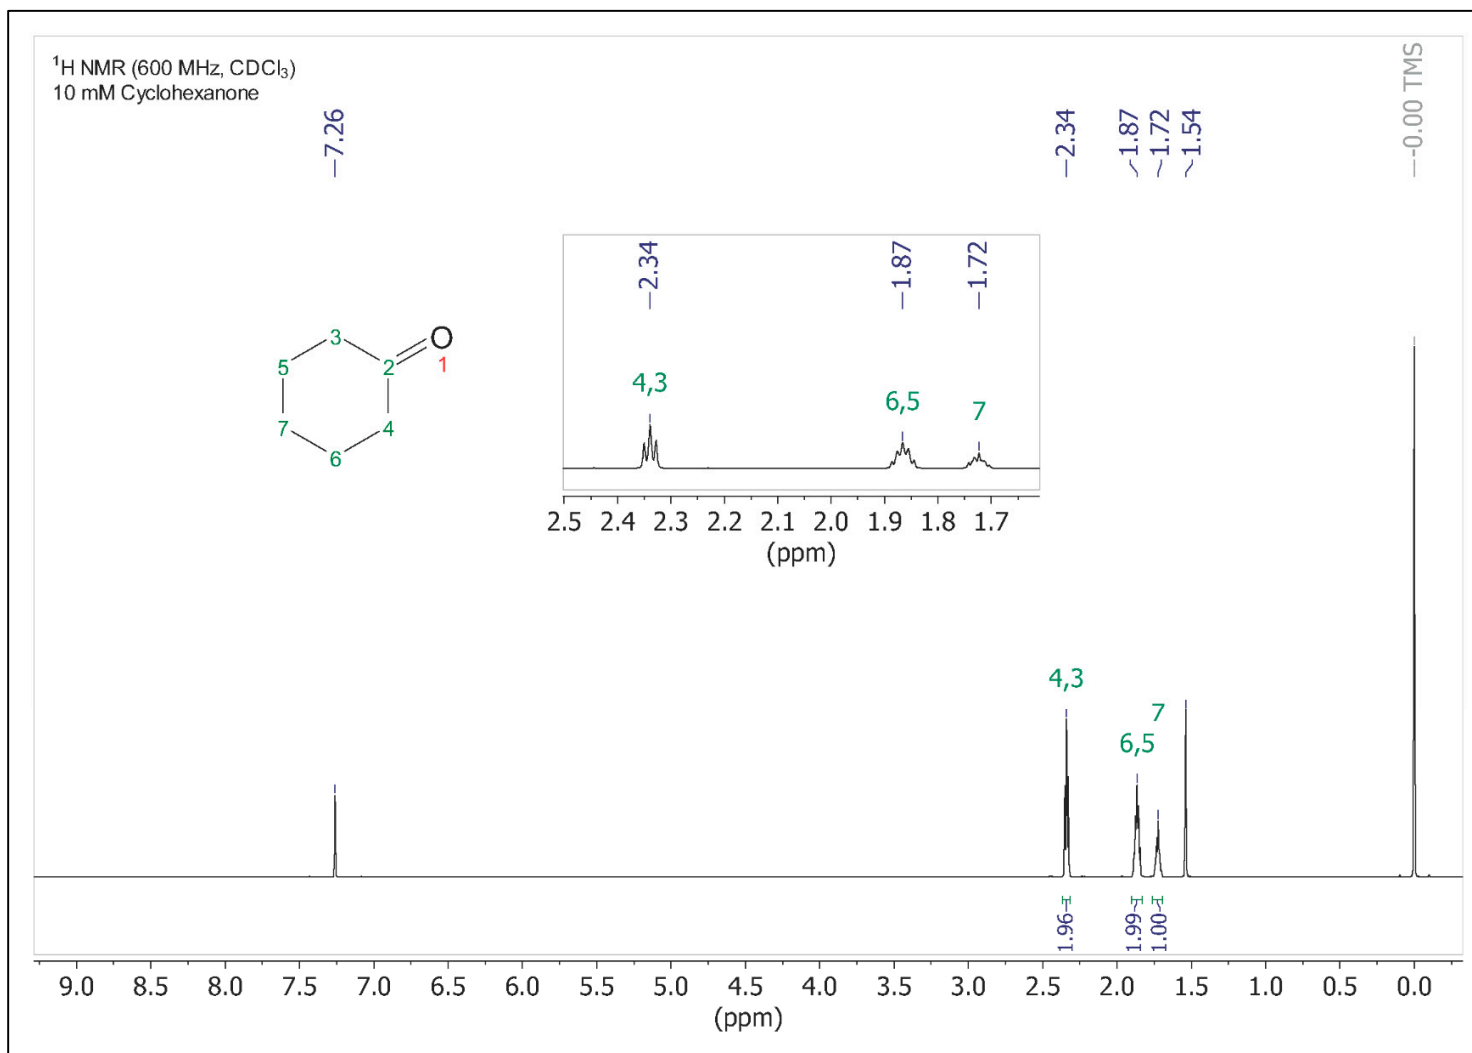

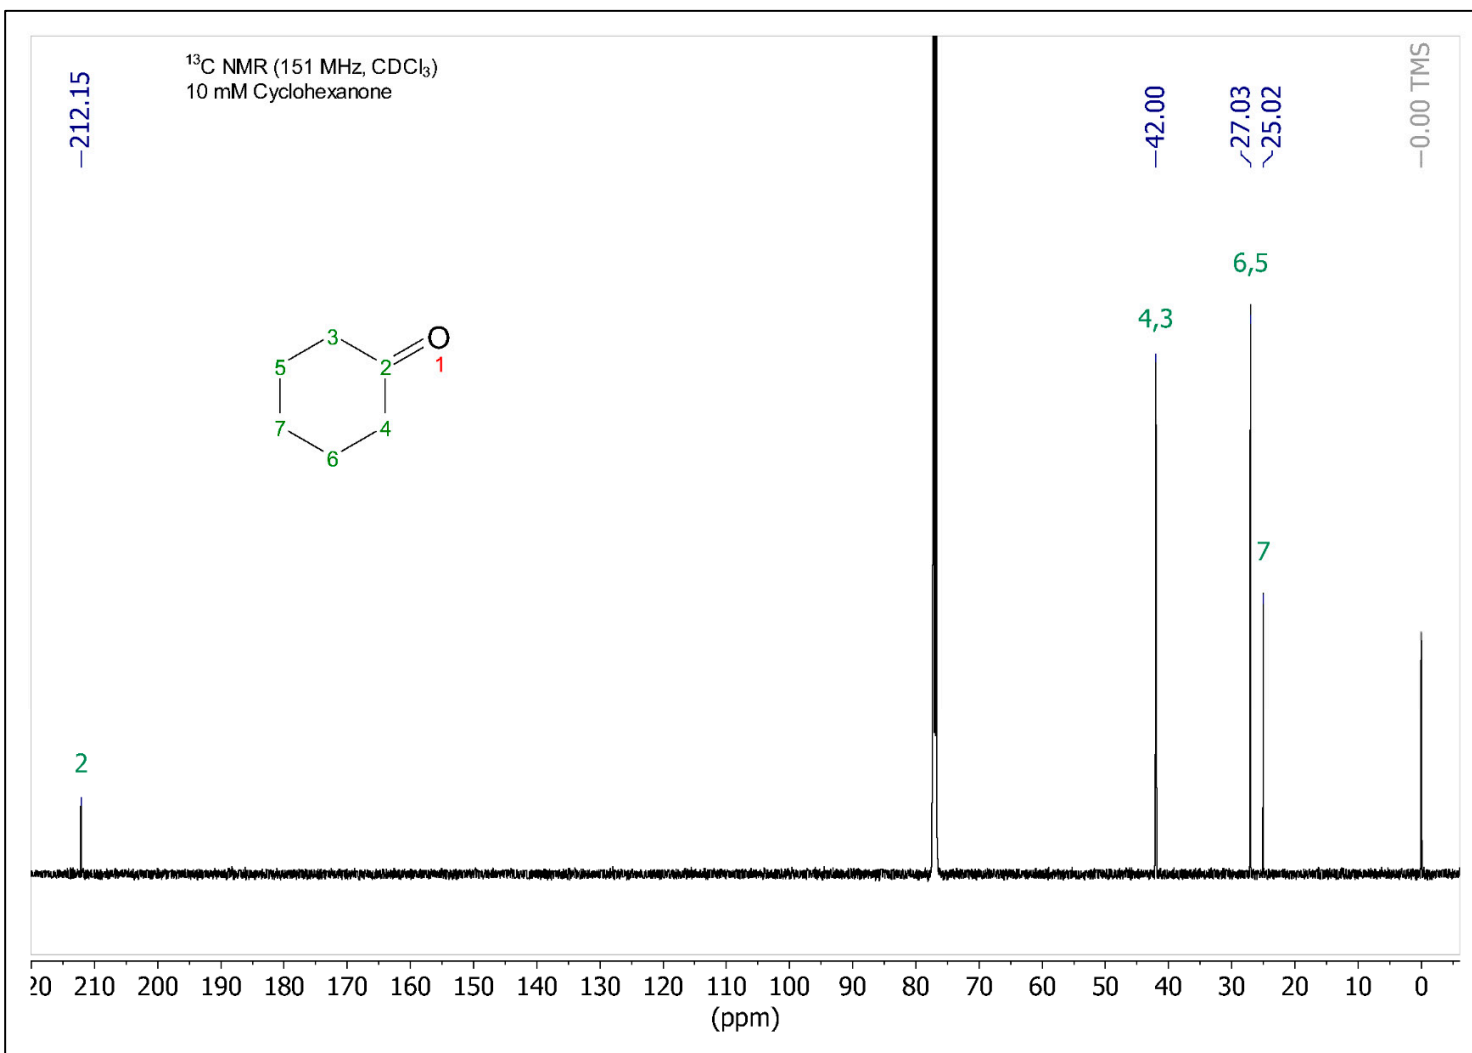

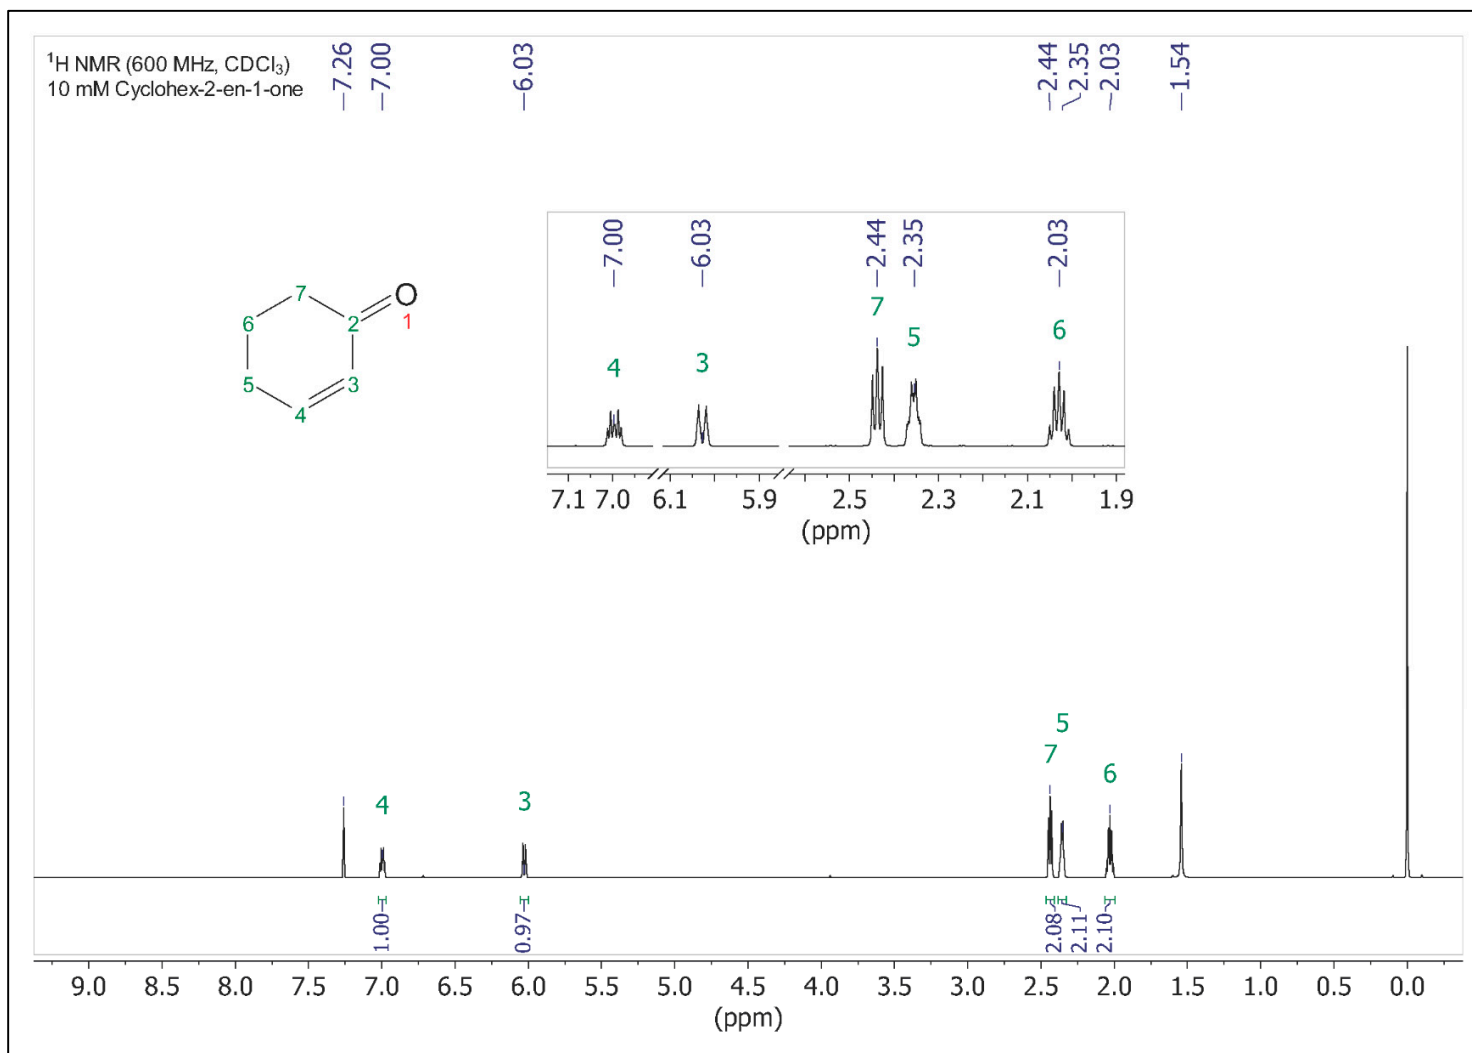

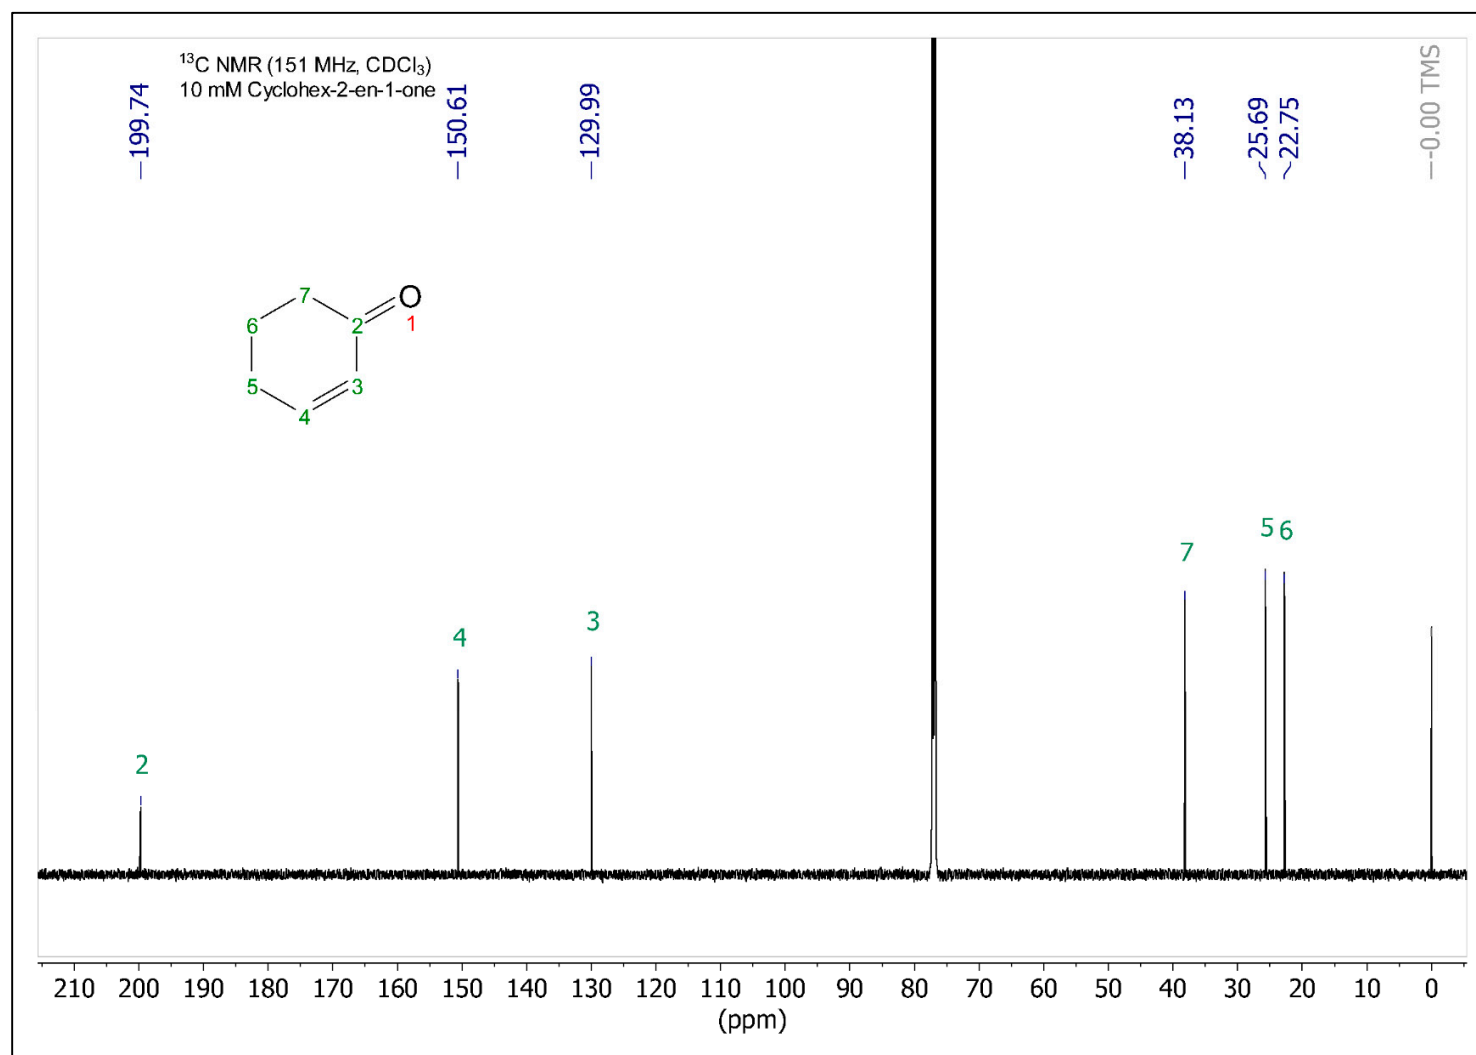

$^1\text{H} / ^1\text{H}$  COSY NMR (600 / 600 MHz,  $\text{CDCl}_3$ )  
10 mM Cyclohex-2-en-1-one

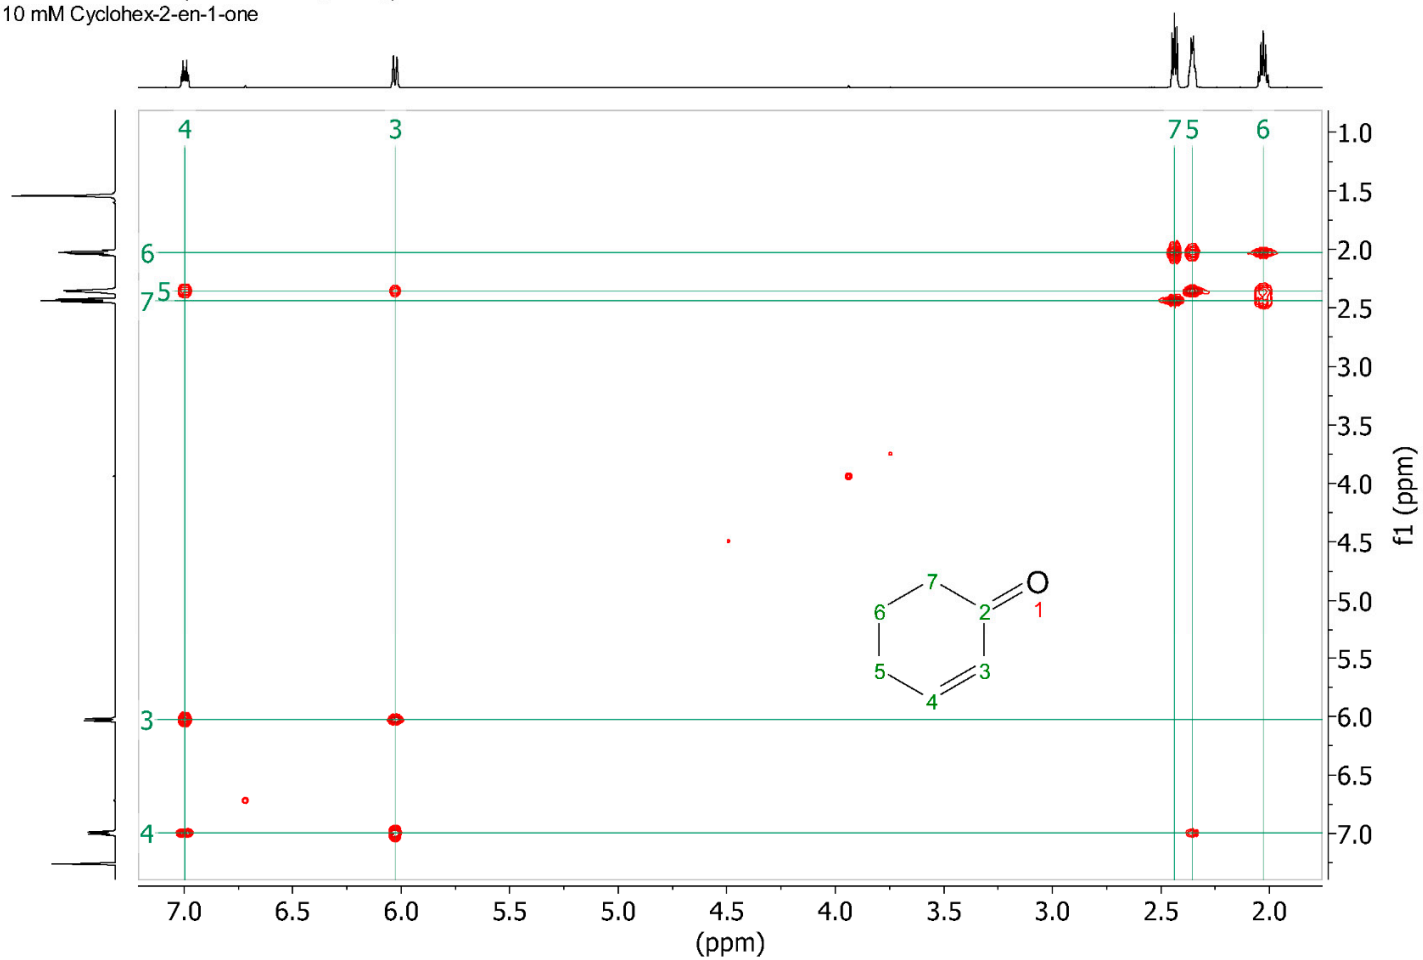



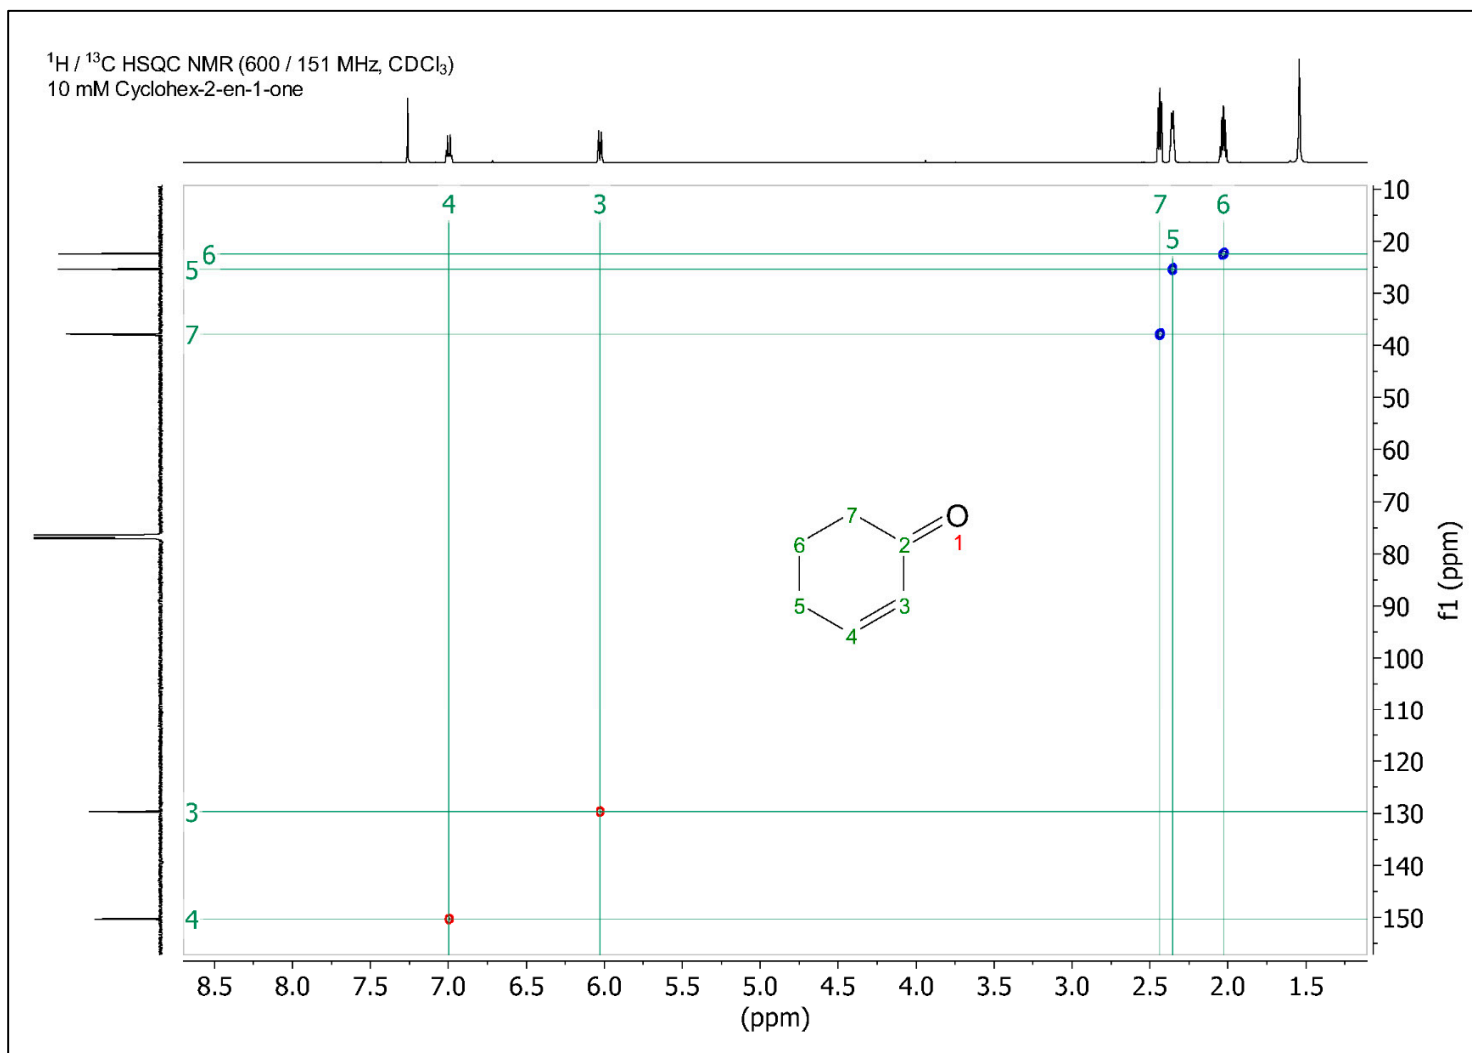

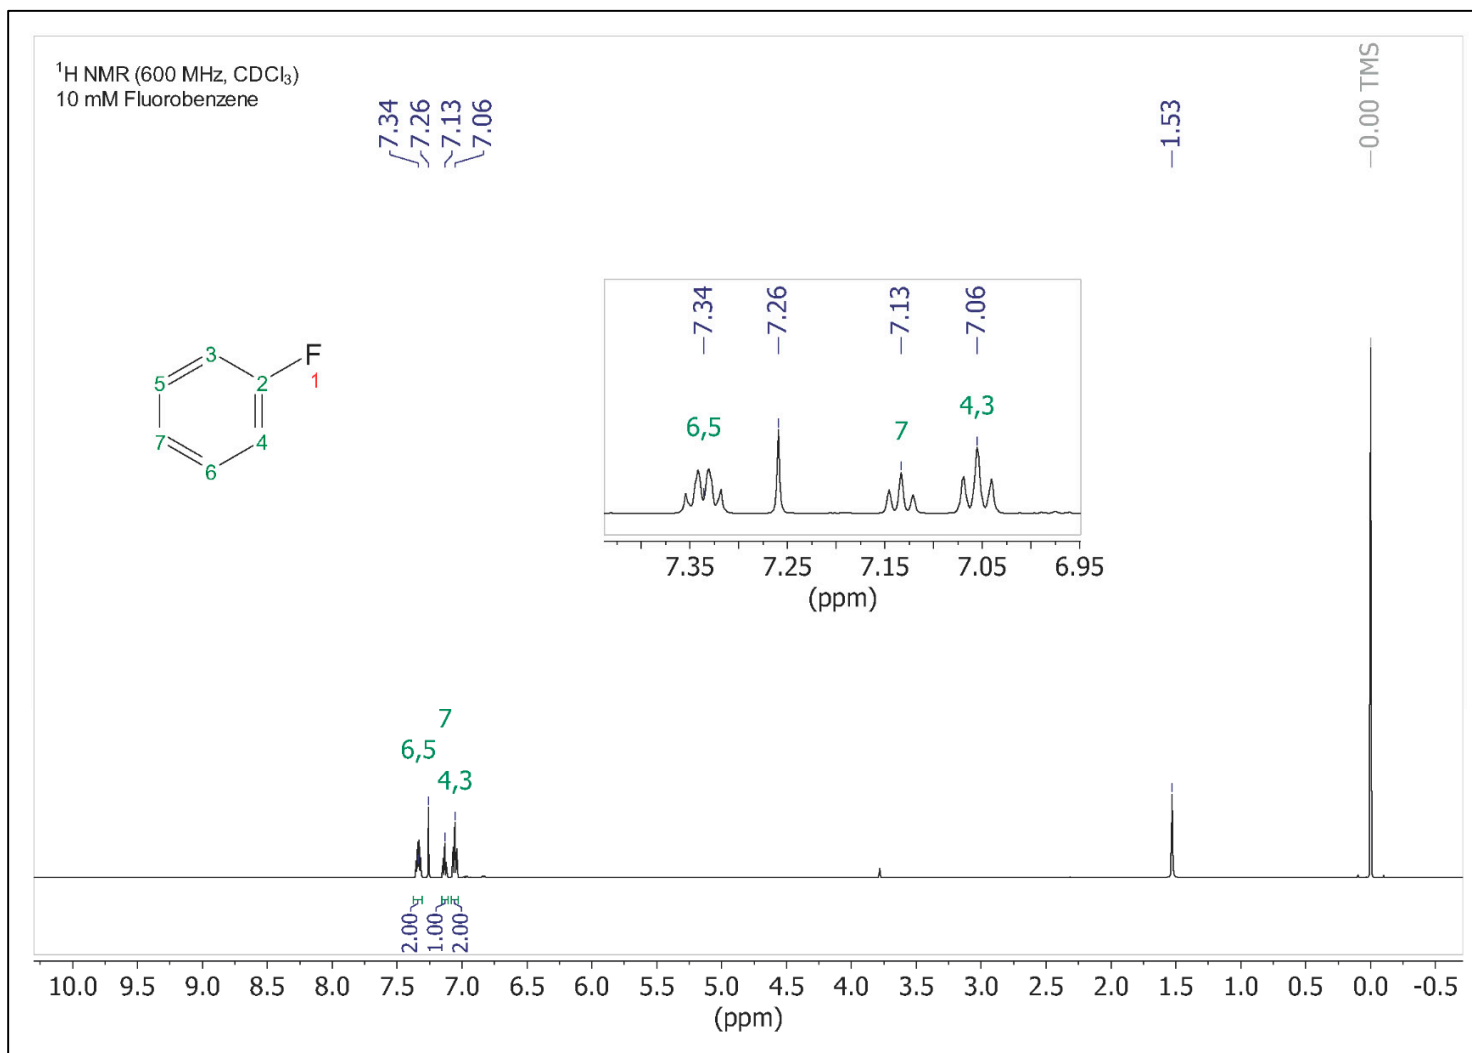

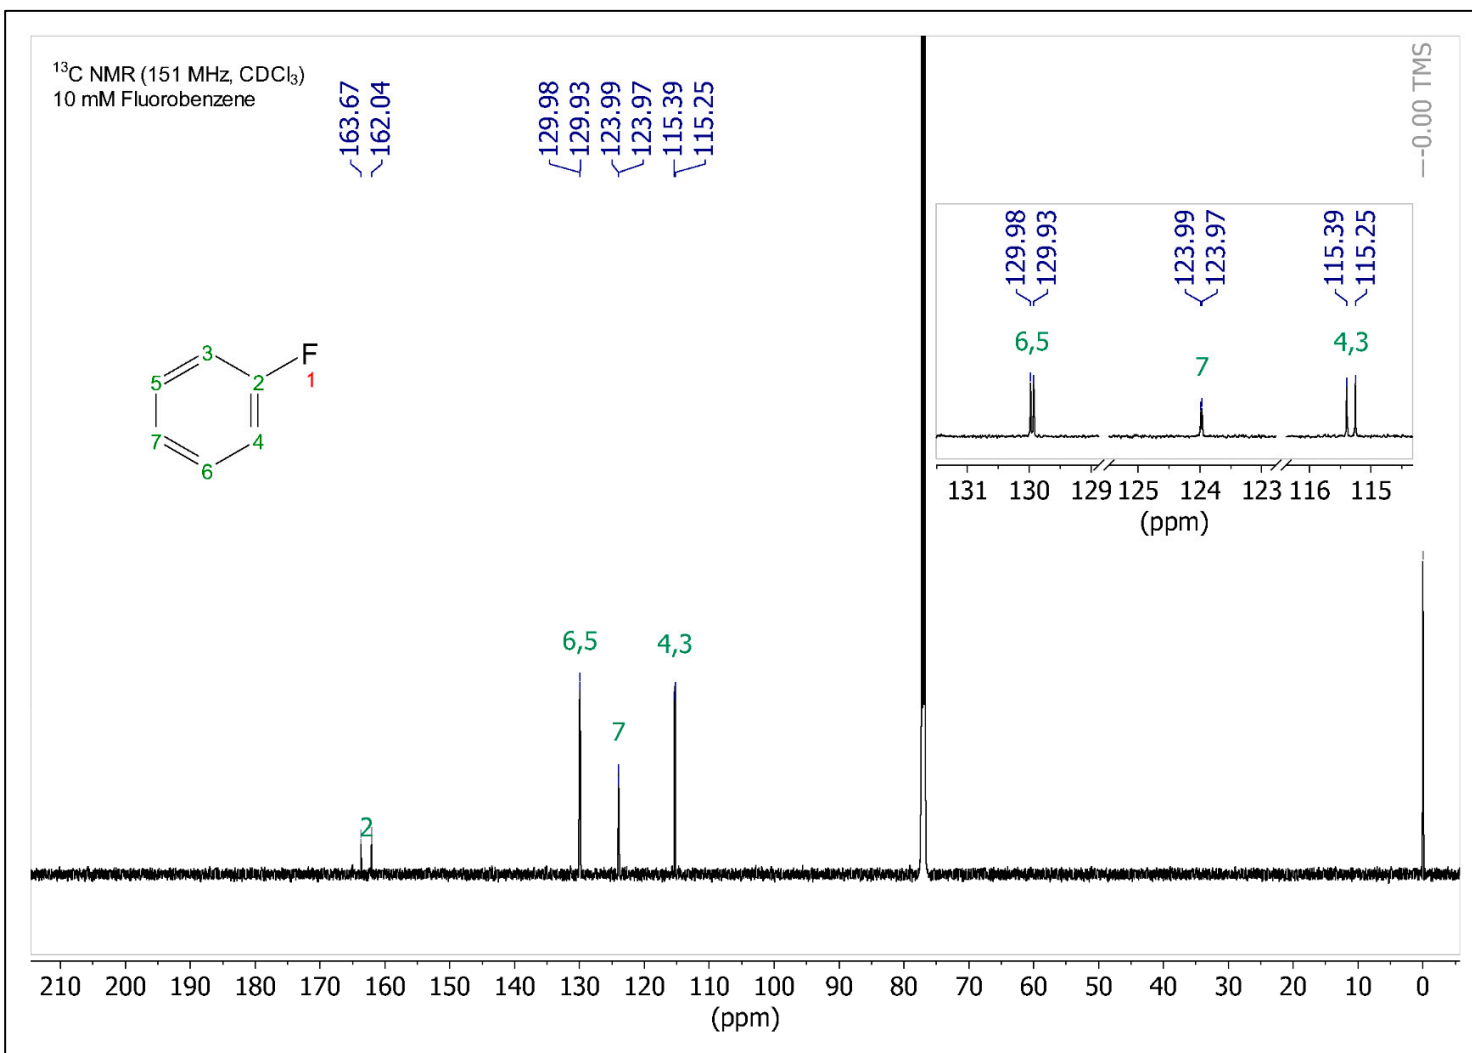

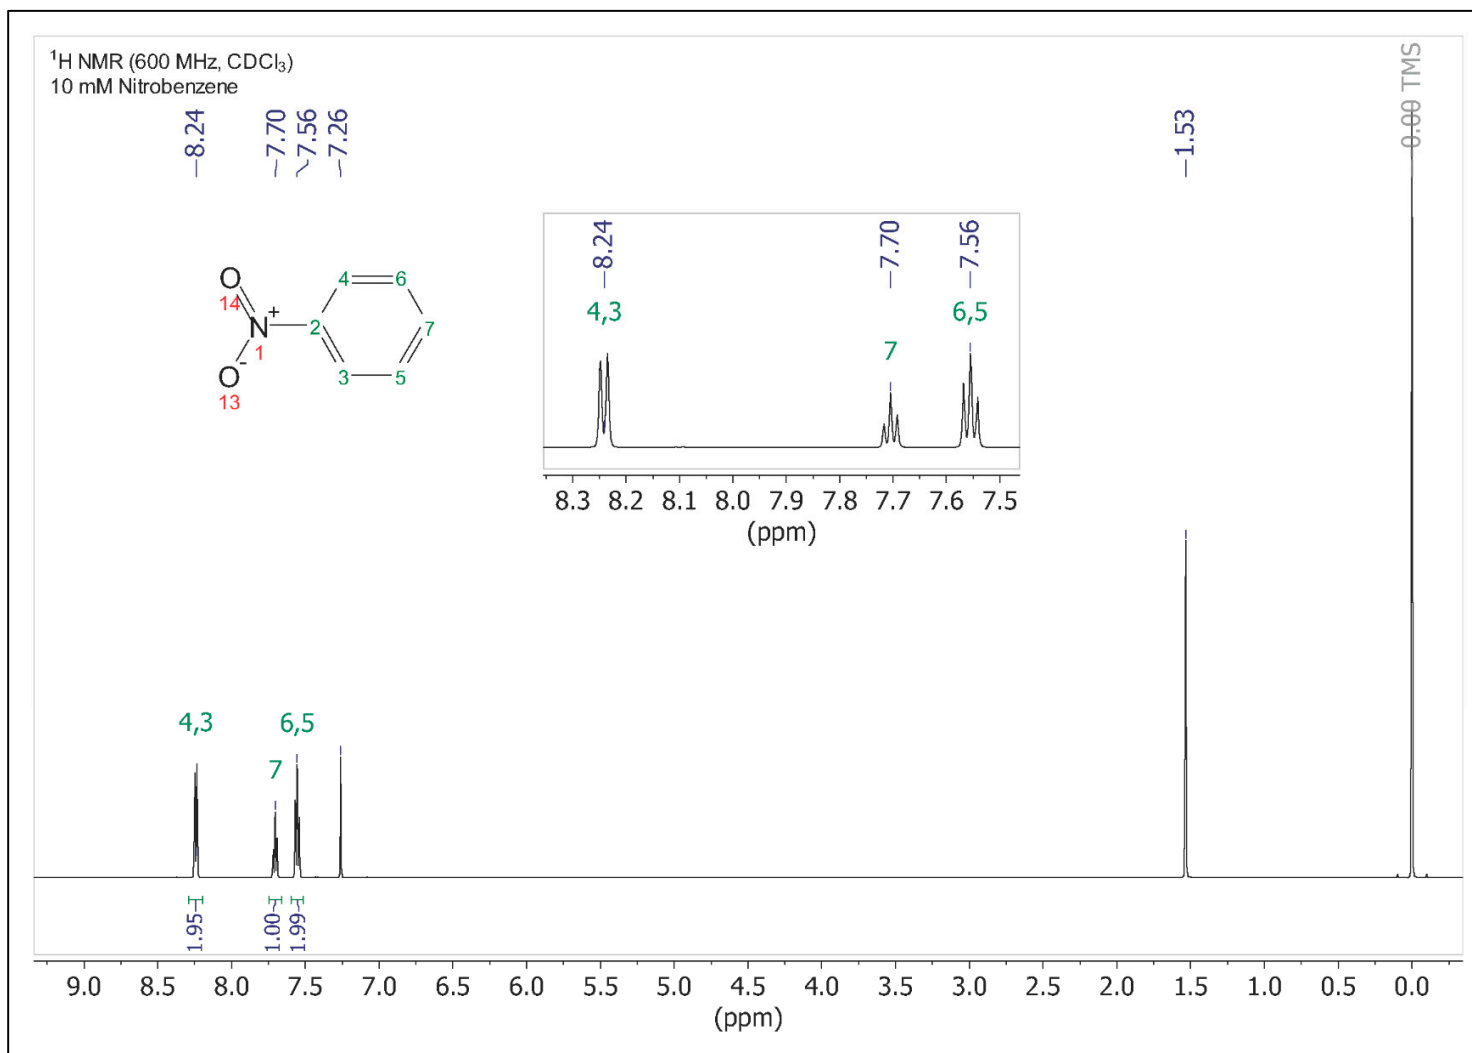

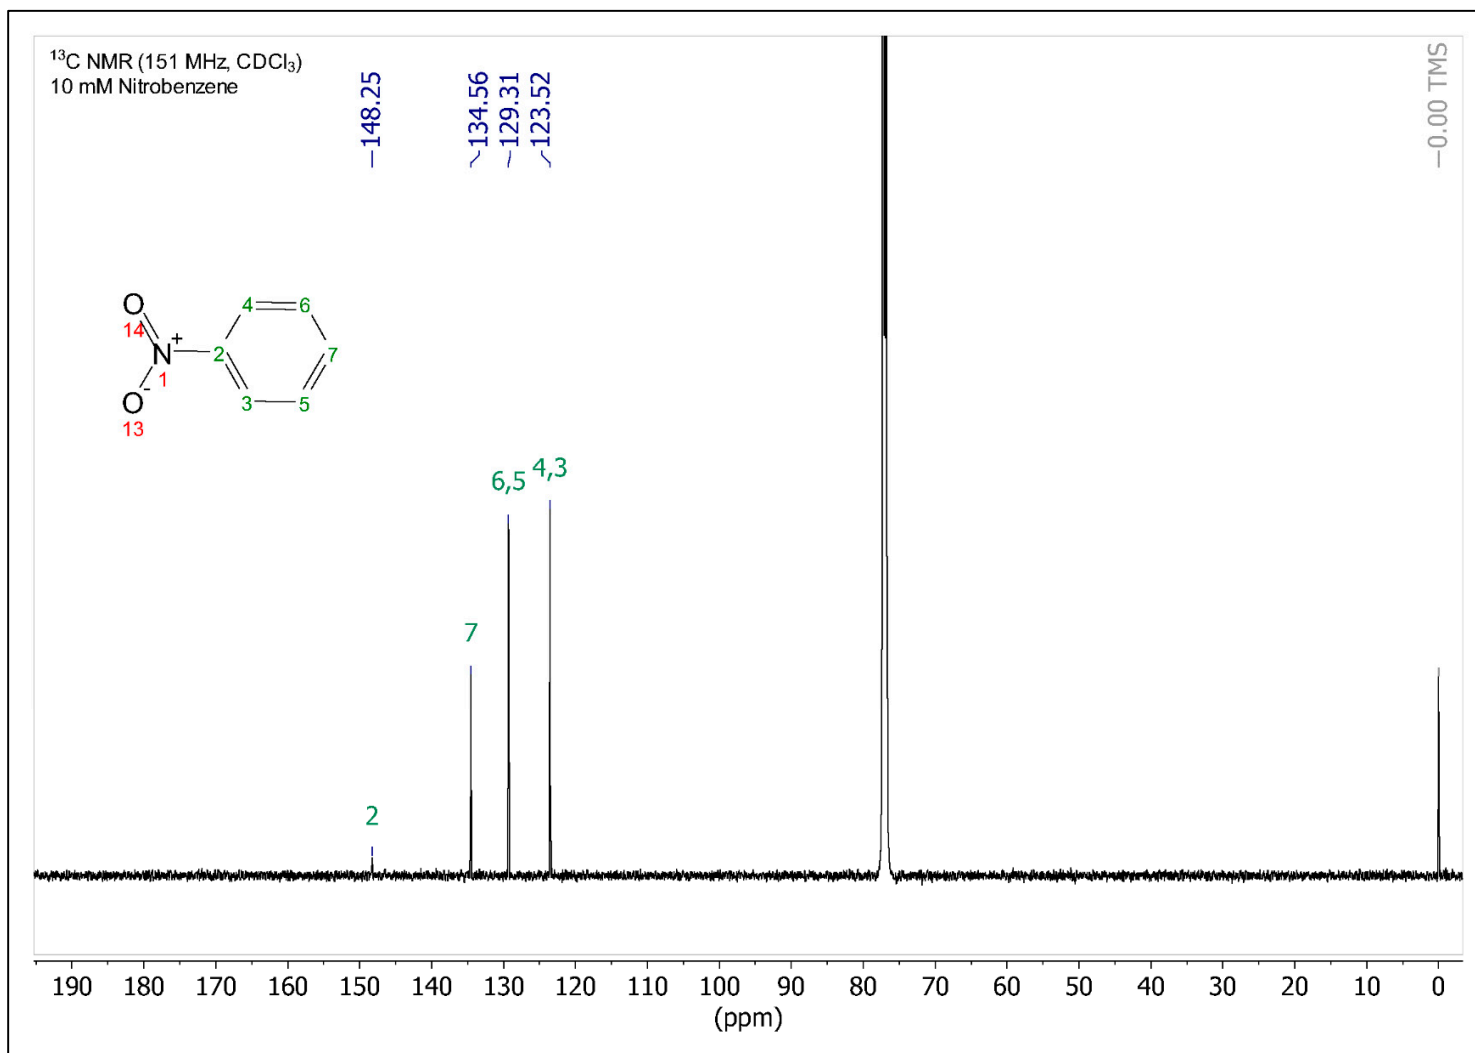

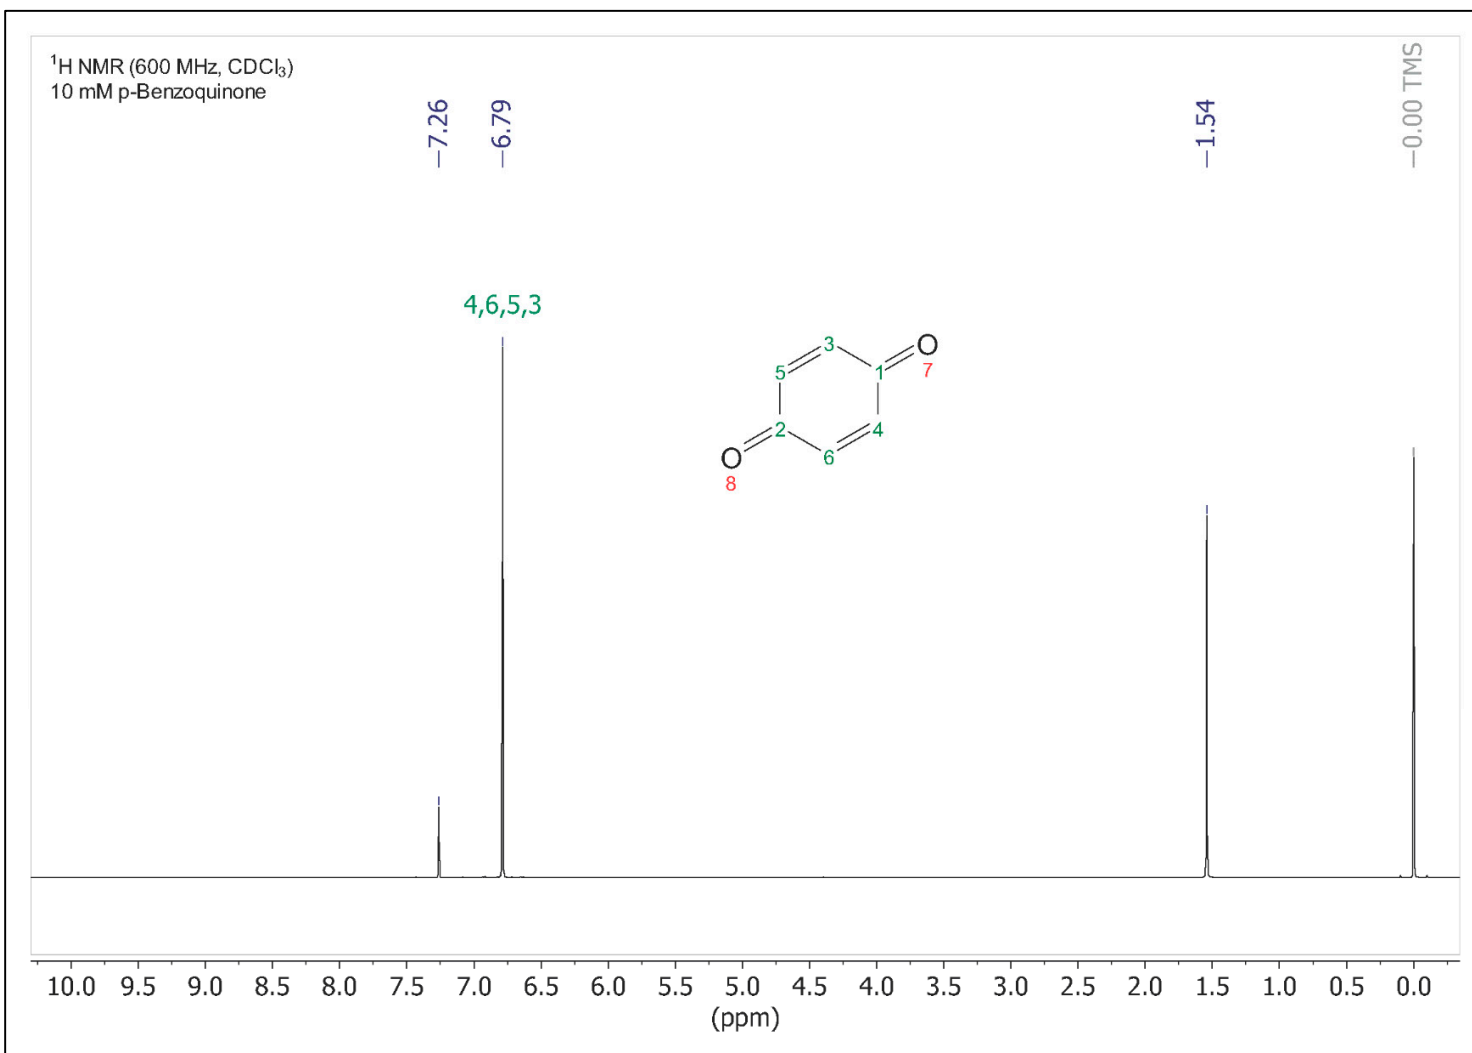

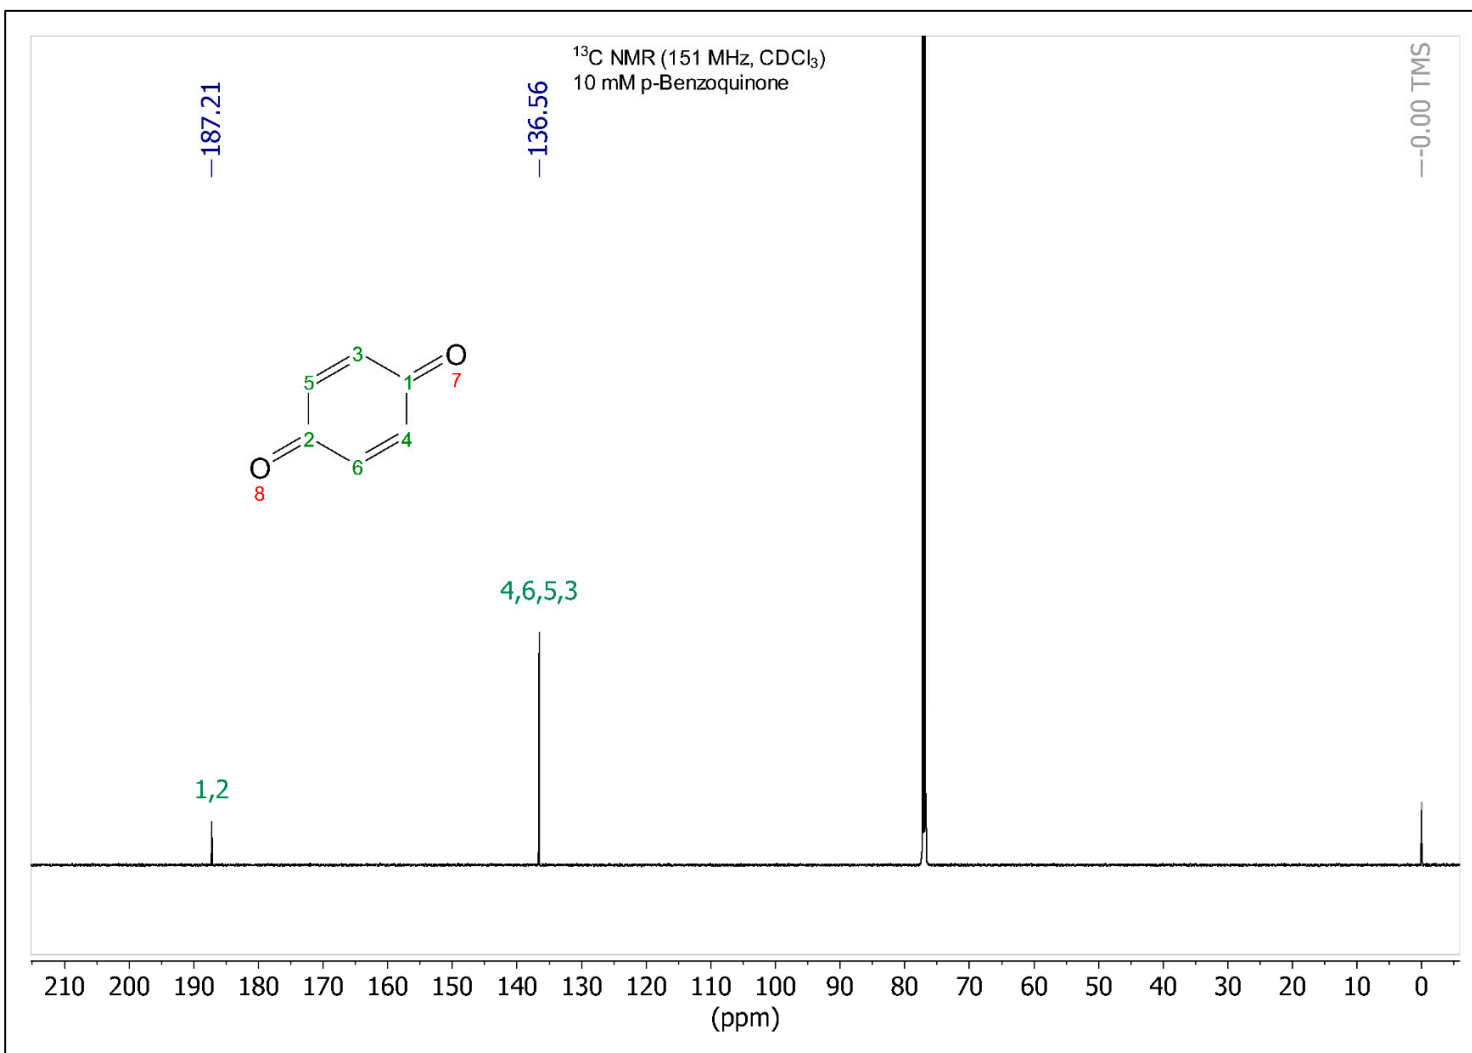

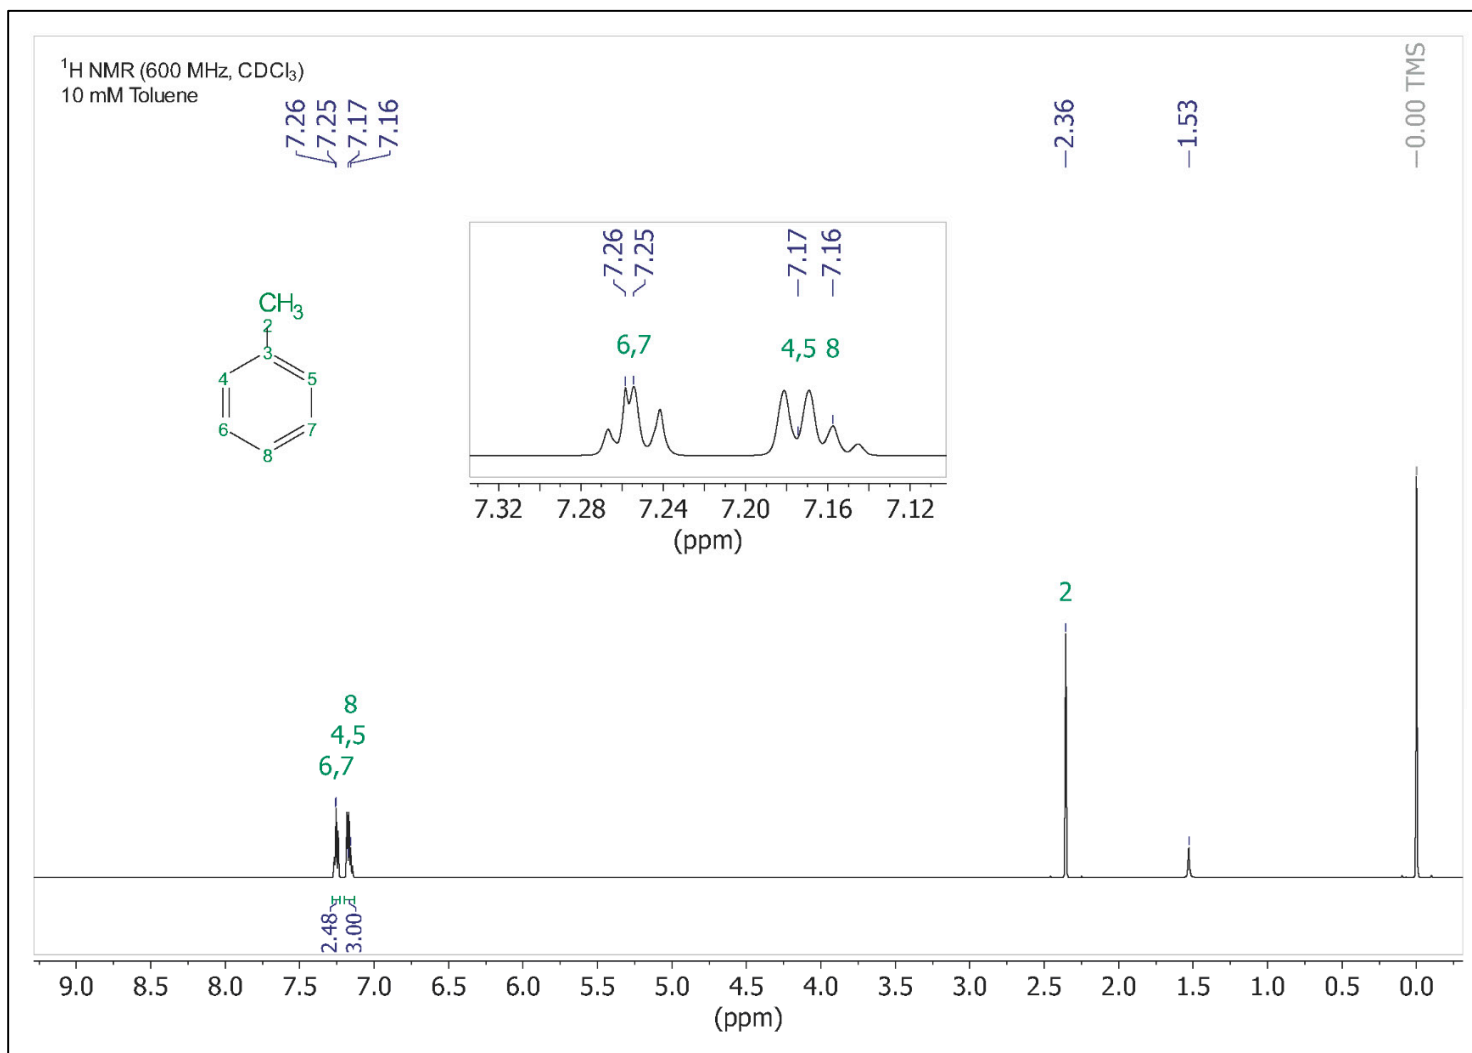



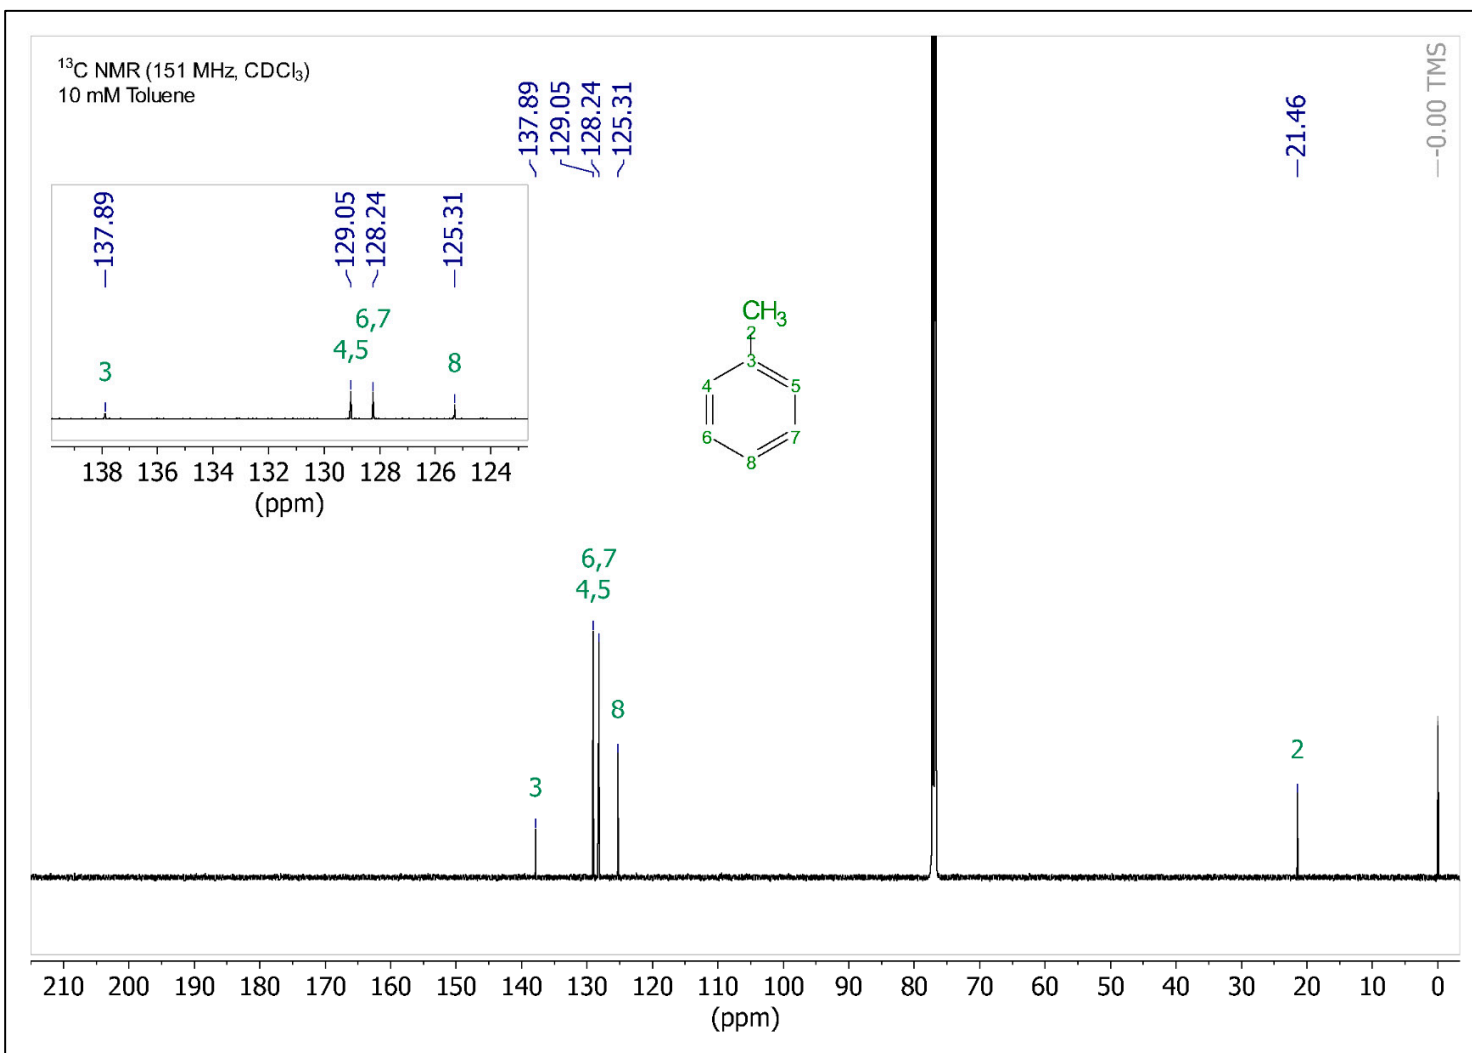

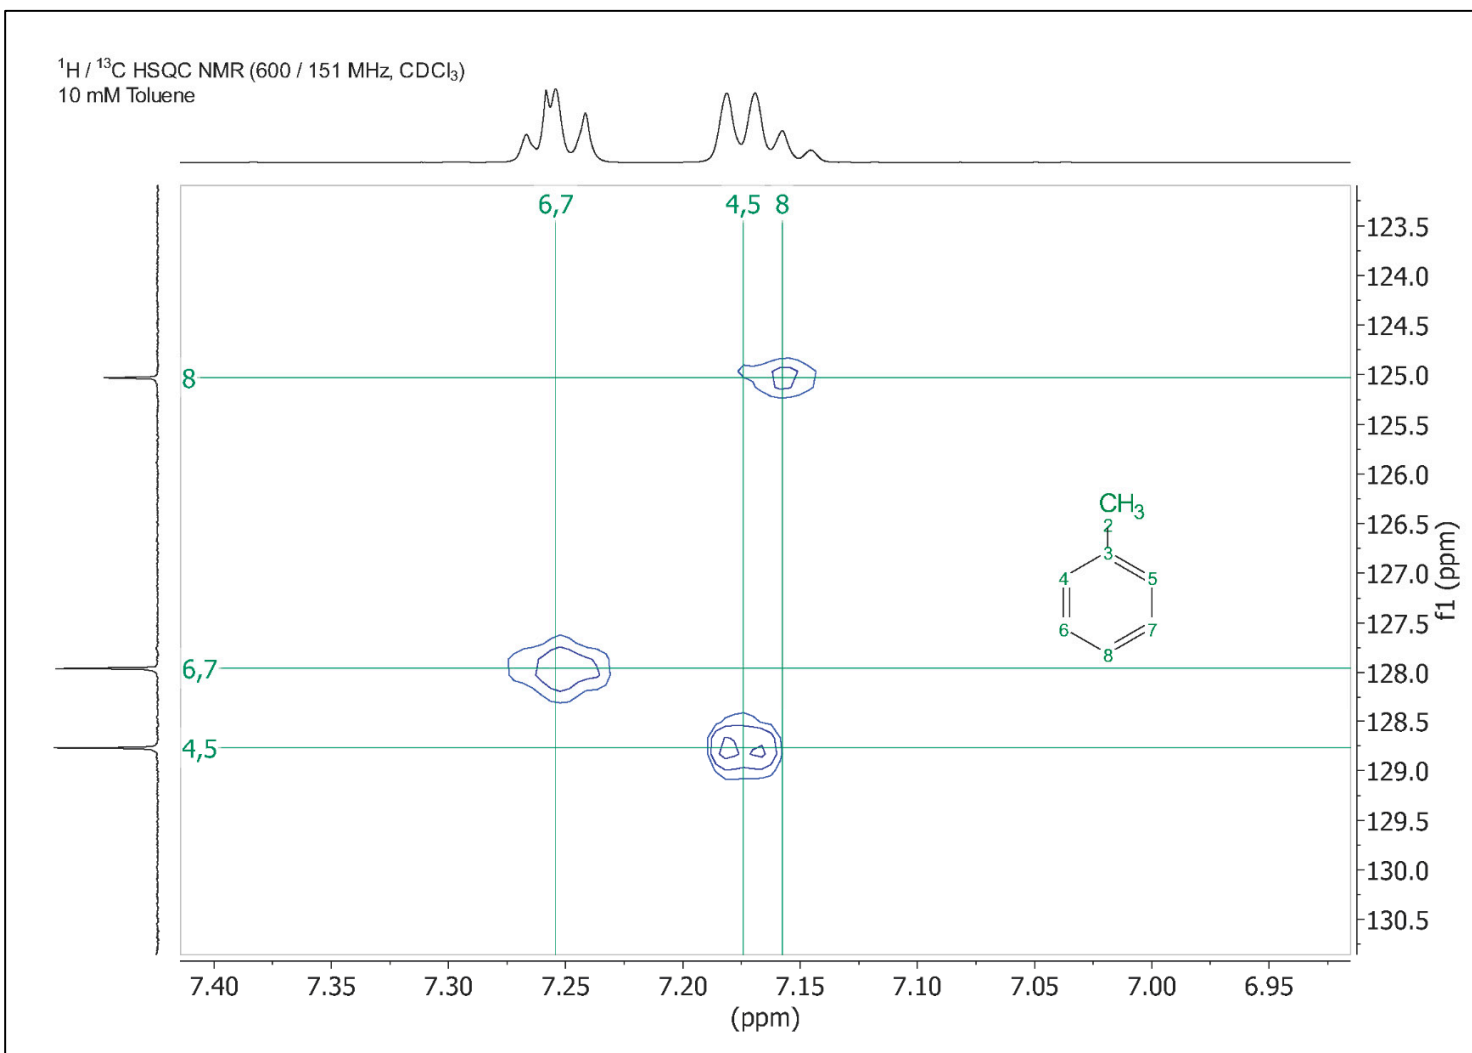

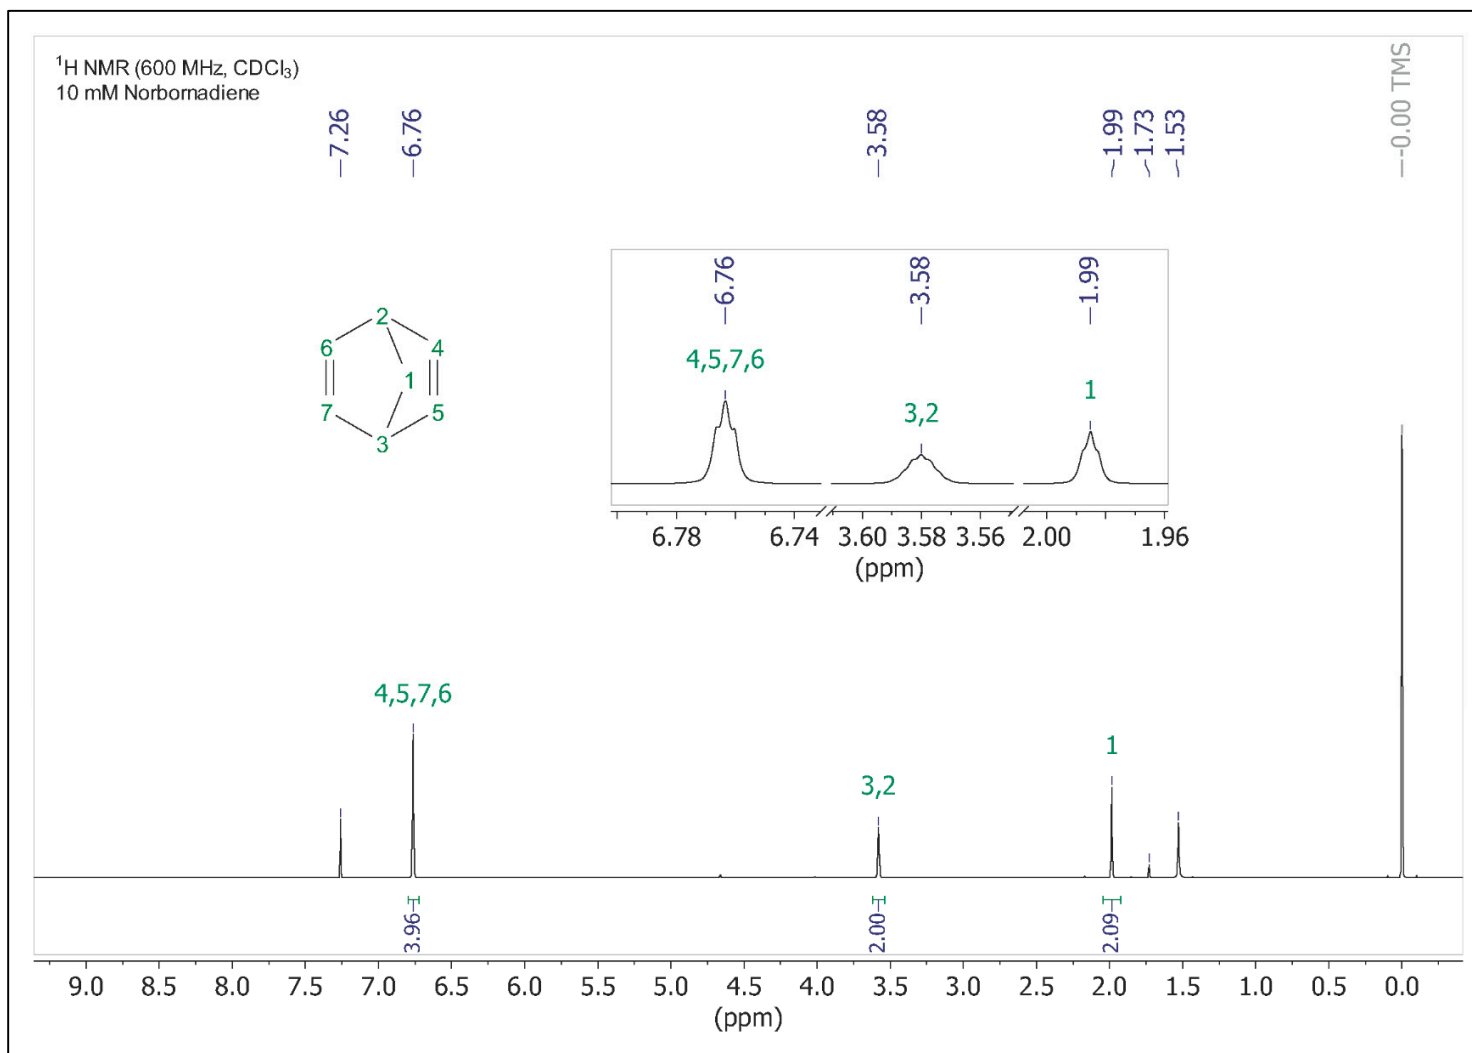

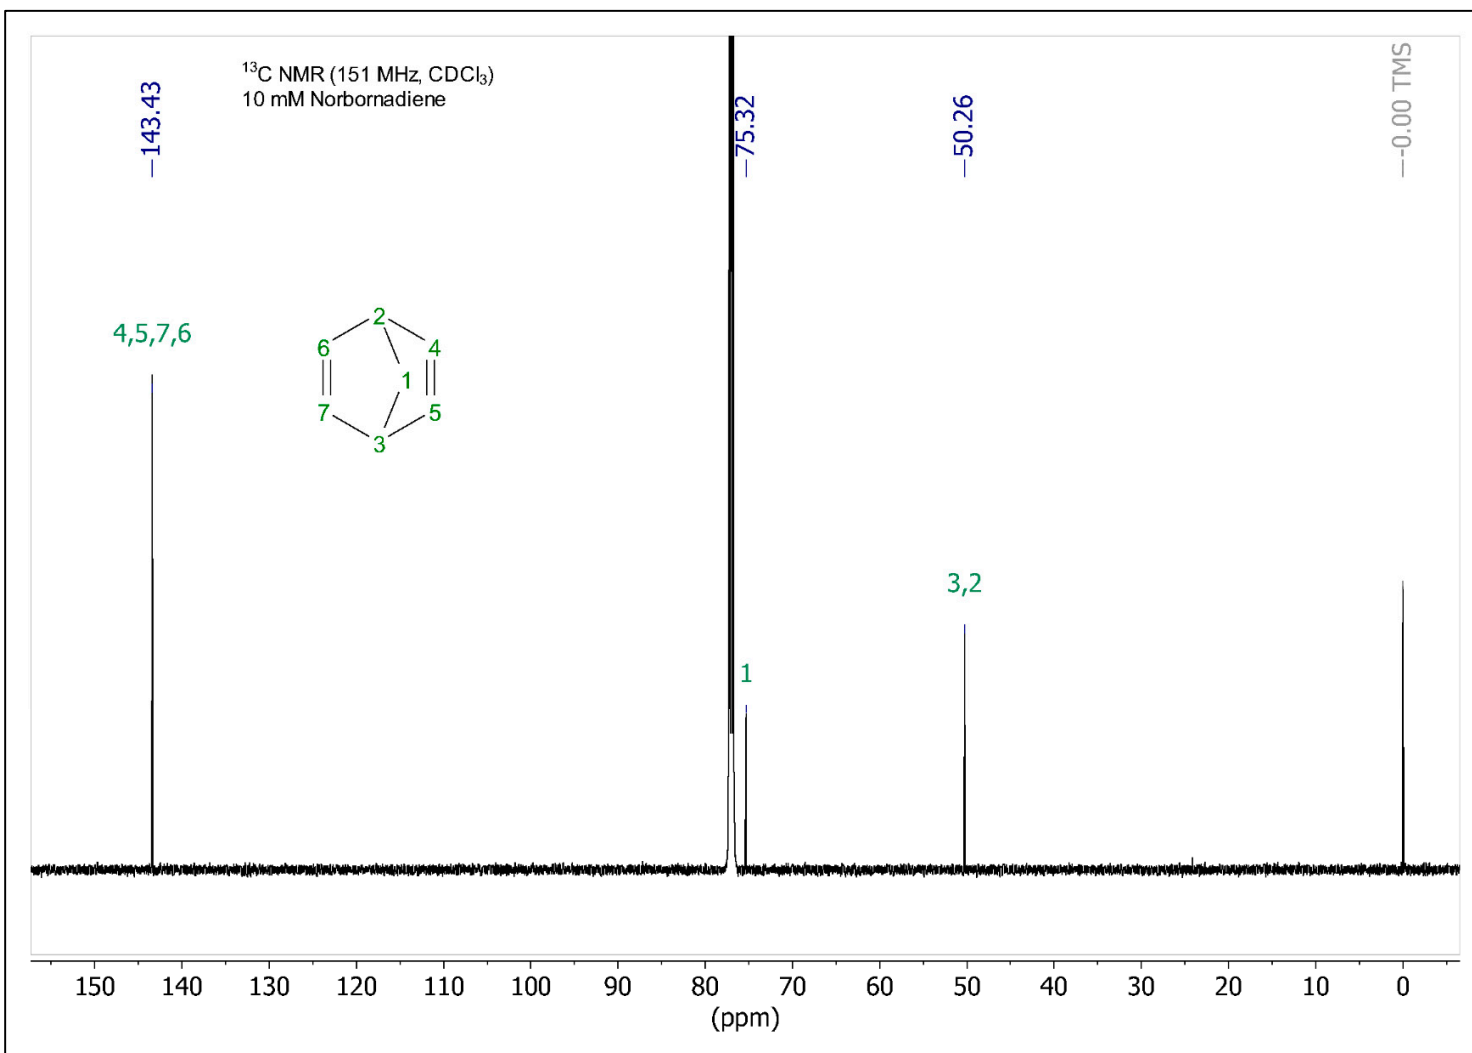

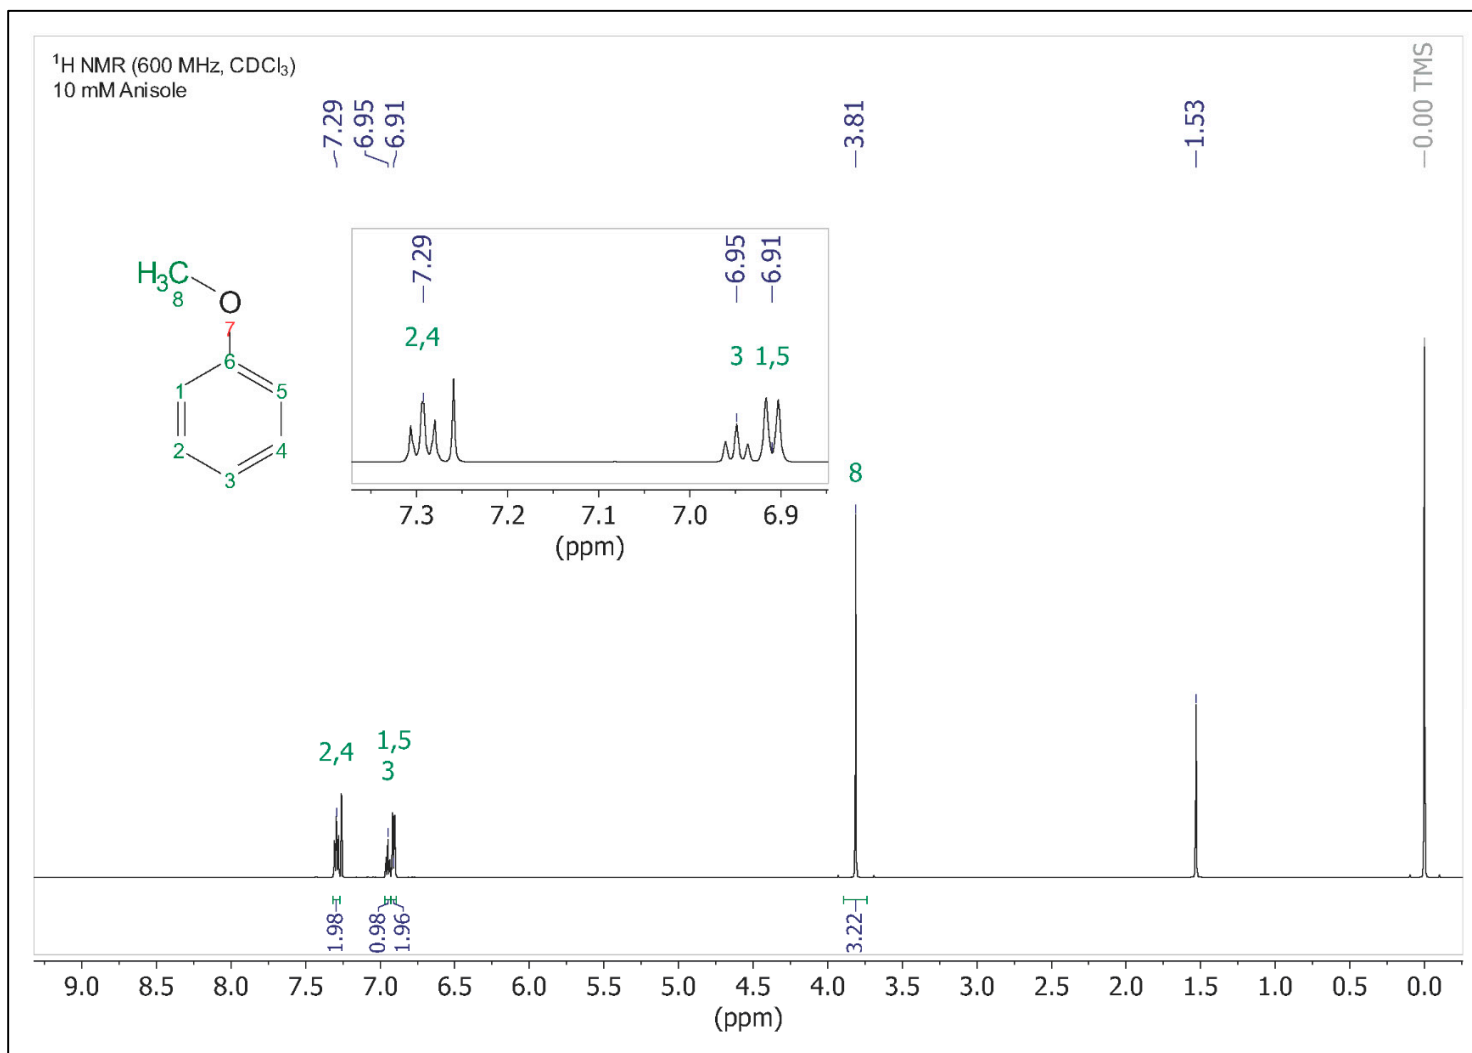

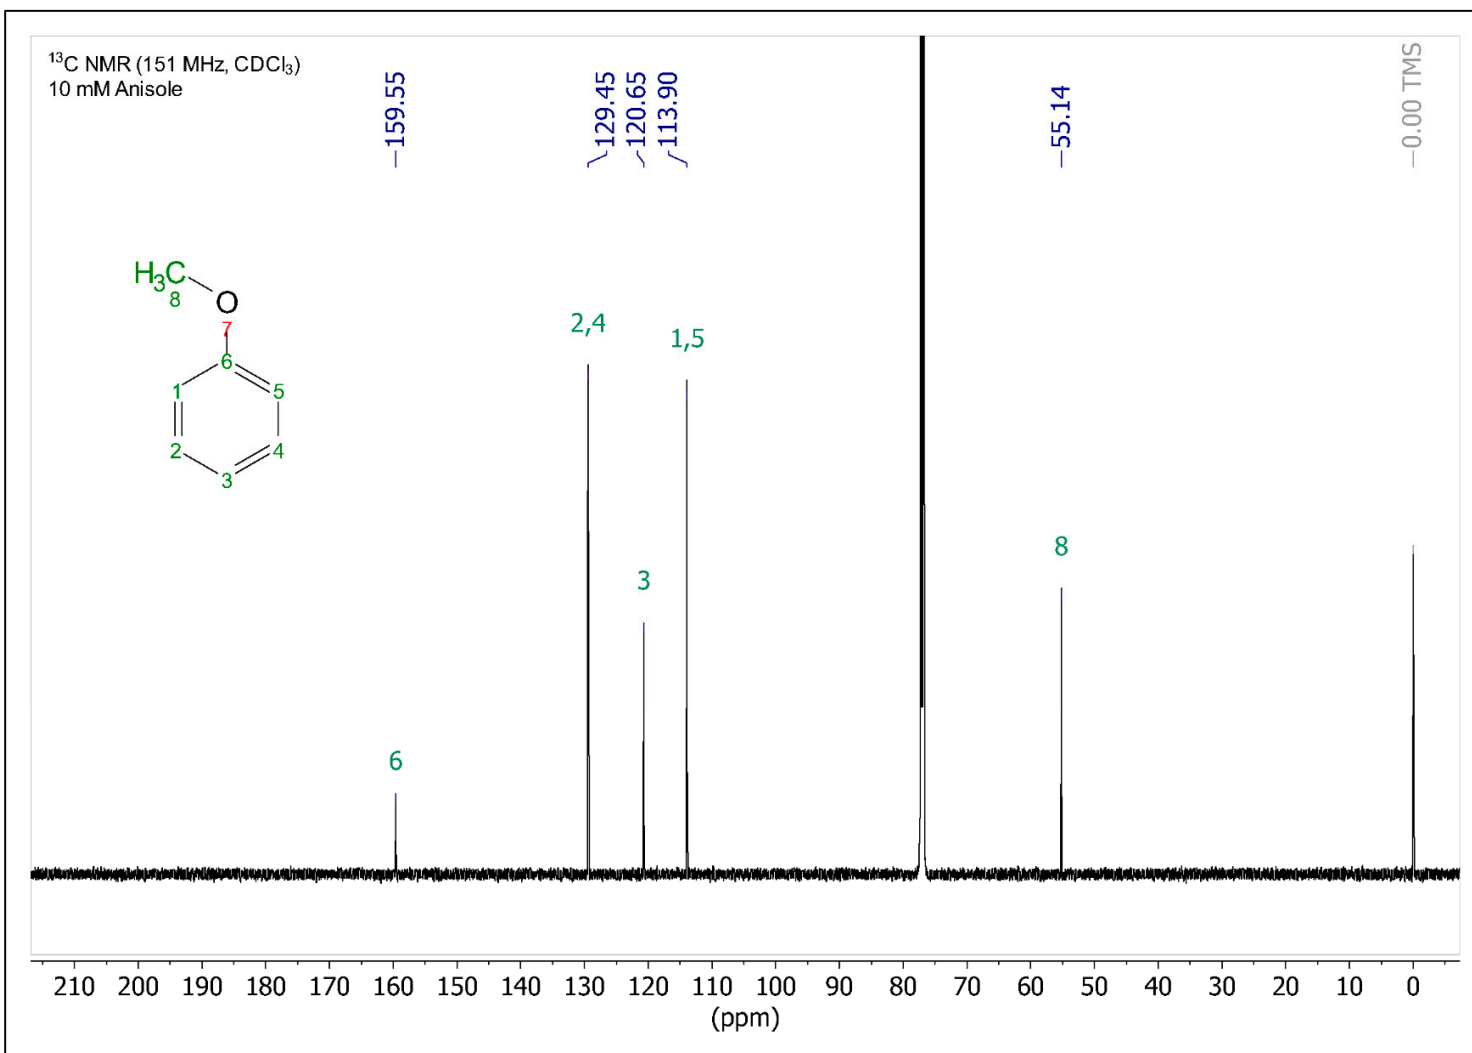

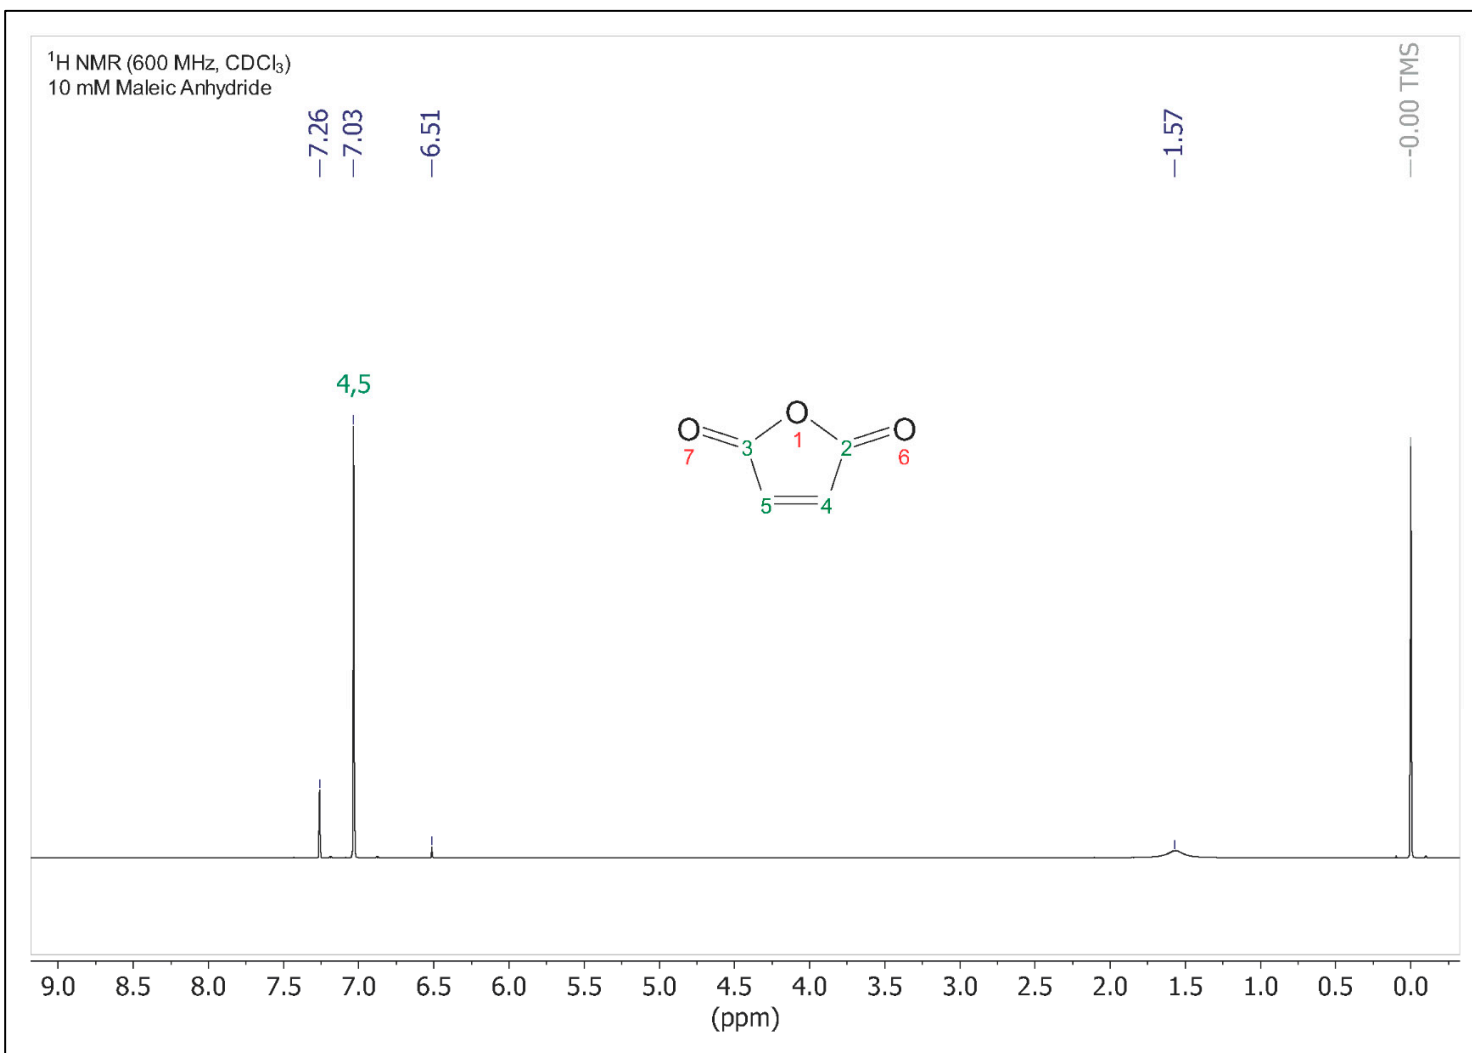

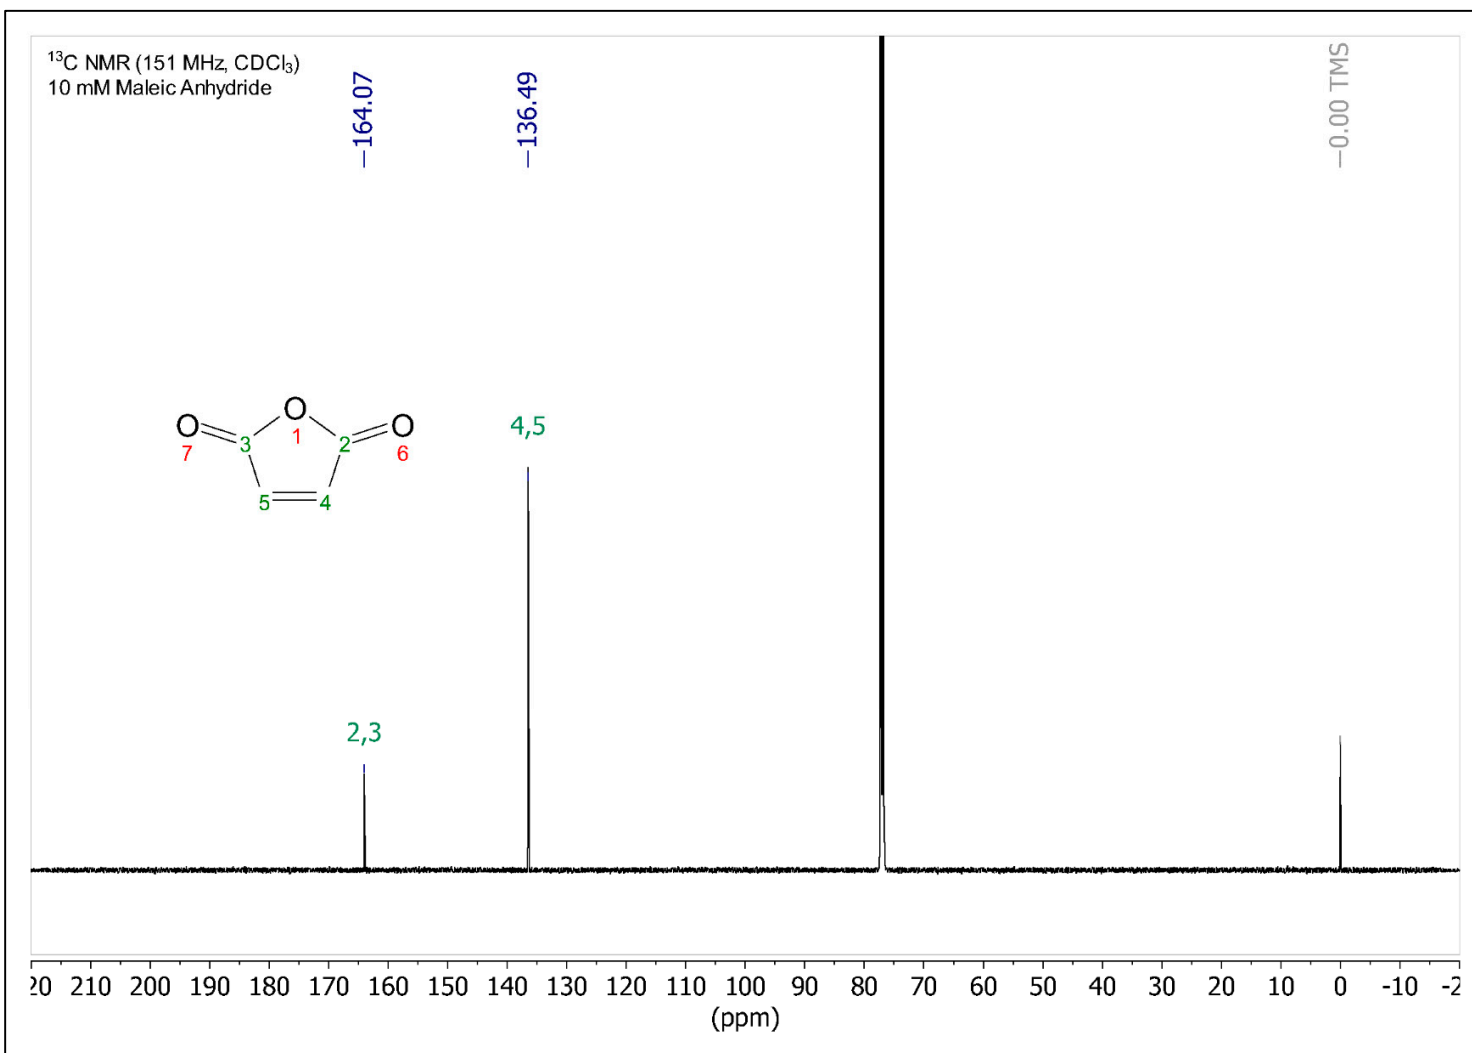



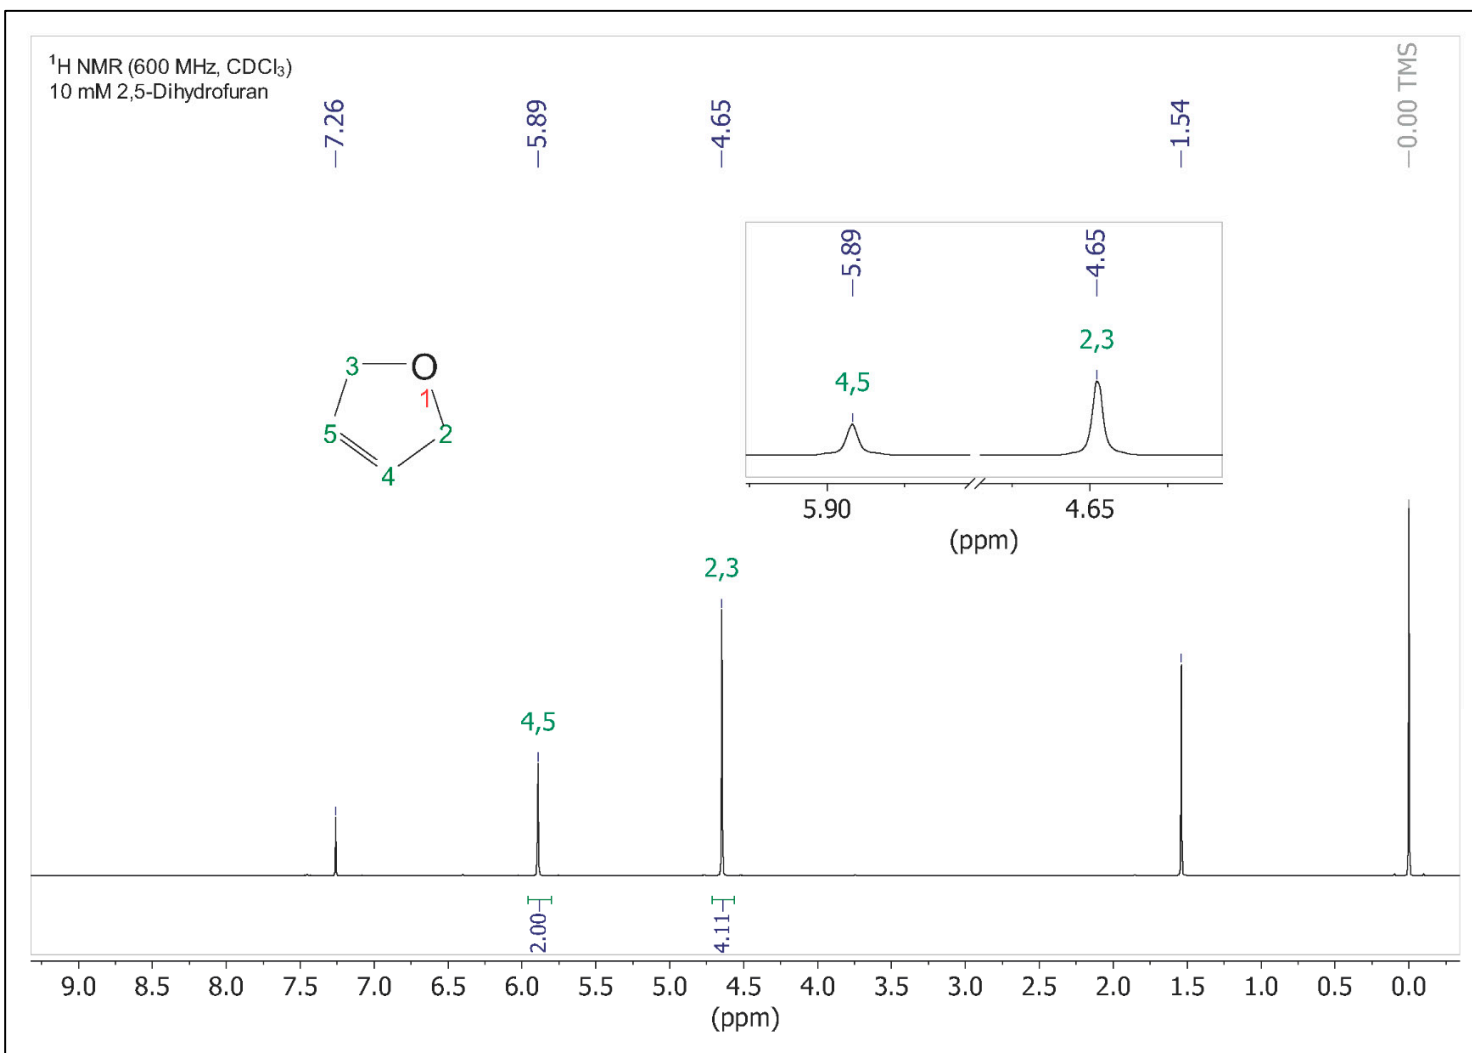

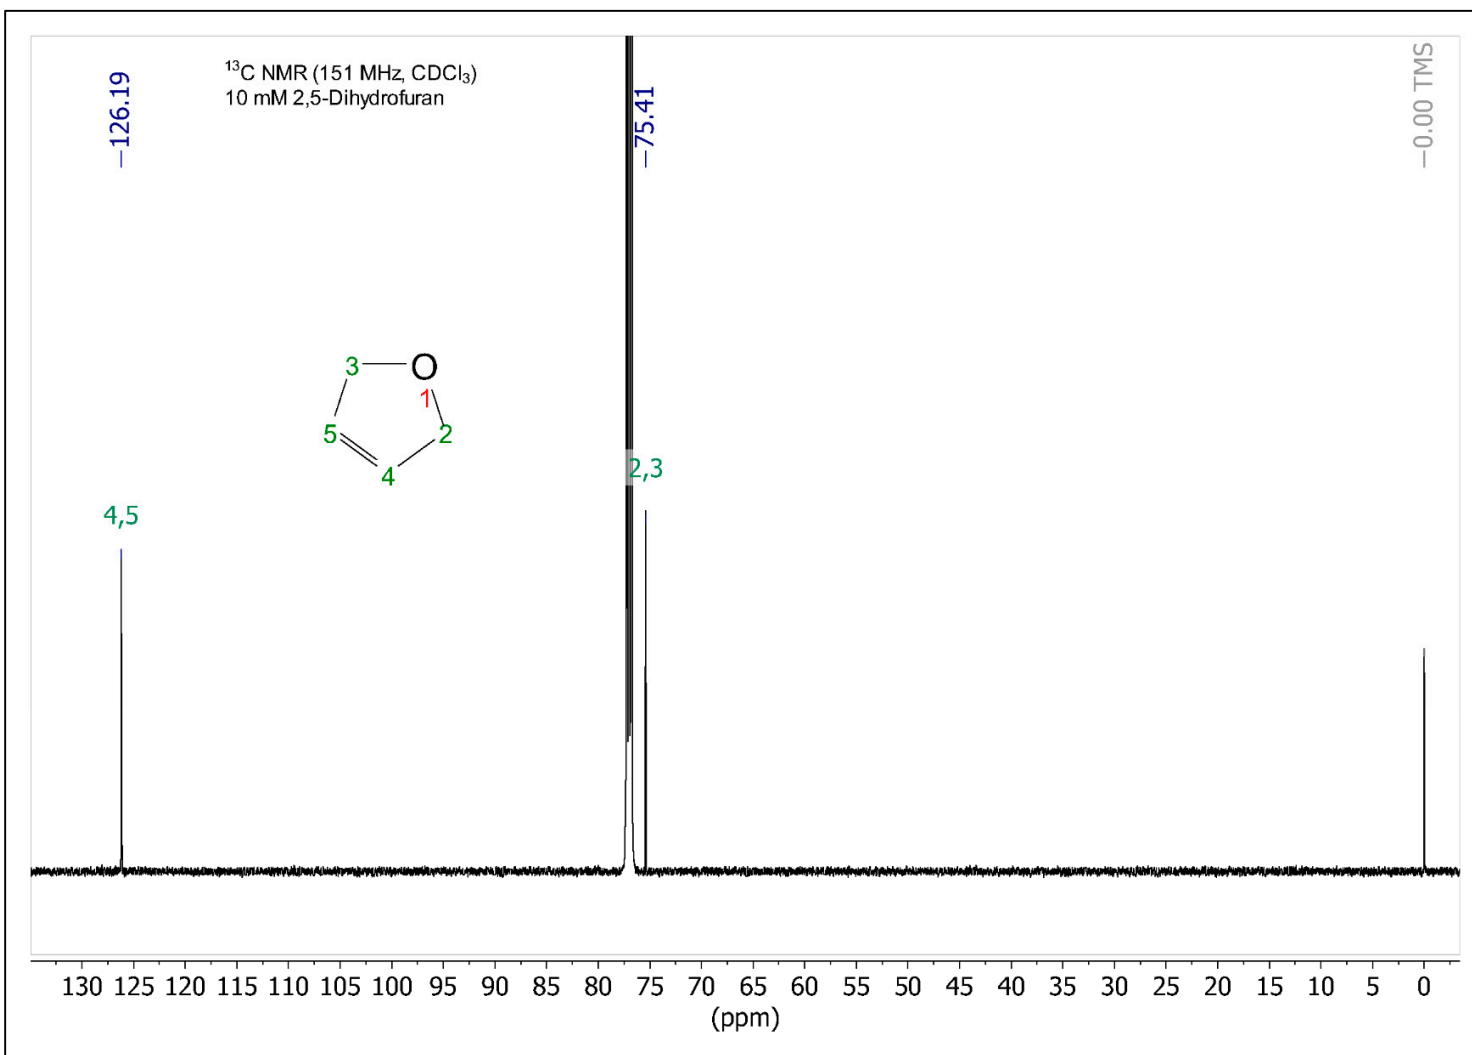

### III. Probe Set NMR Data

The following small- to medium-sized synthetic organic compounds and natural products were included in the probe set: bicyclo[2.1.1]hexan-2-one,  $\alpha$ -pinene, aquatolide, naupliolide, echinopine B, parthenolide, diepoxyguaianolide, cannabicitran (CBT-C), ingenane diterpene 8, artemisinin, nobilistine A, intricarene, strychnine, holstiine, colchicine, hexacyclinol, homodimericin A, strychnobaillonine, sungucine, and paclitaxel. Results from DFT calculations of  $^1\text{H}$  and  $^{13}\text{C}$  NMR chemical shifts of each compound are listed in Table S1 through Table S22.

**Table S1.** Comparison of DFT  $\delta_{\text{H}}$  and  $\delta_{\text{C}}$  predictions for **bicyclo[2.1.1]hexan-2-one**

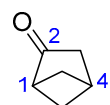

| <div>Method: 1<sup>a</sup> 2<sup>b</sup> Lit.<sup>c</sup></div> <div>Expt<sup>d</sup> DFT DFT DFT ML<sup>e</sup></div> |      |             |             |             |             | <div>Method: 1<sup>a</sup> 2<sup>b</sup> Lit.<sup>c</sup></div> <div>Expt<sup>d</sup> DFT DFT DFT ML<sup>e</sup></div> |       |             |             |             |             |
|------------------------------------------------------------------------------------------------------------------------|------|-------------|-------------|-------------|-------------|------------------------------------------------------------------------------------------------------------------------|-------|-------------|-------------|-------------|-------------|
| $\delta_{\text{H}}$ (ppm)                                                                                              |      |             |             |             |             | $\delta_{\text{C}}$ (ppm)                                                                                              |       |             |             |             |             |
| Atom                                                                                                                   |      |             |             |             |             | Atom                                                                                                                   |       |             |             |             |             |
| 1                                                                                                                      | 2.83 | 2.82        | 2.79        | 2.67        | 3.00        | 1                                                                                                                      | 56.1  | <b>55.3</b> | 55.5        | <b>57.8</b> | <b>45.9</b> |
| 3                                                                                                                      | 2.14 | 2.13        | 2.19        | 2.08        | 1.99        | 2                                                                                                                      | 213.7 | 214.0       | 213.9       | 213.7       | 211.5       |
| 4                                                                                                                      | 2.83 | 2.85        | <b>2.71</b> | <b>2.63</b> | 2.60        | 3                                                                                                                      | 40.8  | 41.5        | <b>41.5</b> | 41.6        | 42.7        |
| 5a                                                                                                                     | 1.62 | 1.65        | 1.71        | 1.59        | 1.63        | 4                                                                                                                      | 36.0  | 35.4        | 35.5        | 37.4        | 31.9        |
| 5b                                                                                                                     | 2.22 | <b>2.27</b> | 2.24        | 2.20        | <b>1.89</b> | 5                                                                                                                      | 40.9  | 40.2        | 40.4        | 40.7        | 31.3        |
| RMSD: <sup>f</sup>                                                                                                     |      |             |             |             |             | RMSD: <sup>f</sup>                                                                                                     |       |             |             |             |             |
| MD: <sup>f</sup>                                                                                                       |      |             |             |             |             | MD: <sup>f</sup>                                                                                                       |       |             |             |             |             |
|                                                                                                                        | 0.03 | 0.07        | 0.12        | 0.21        | 0.21        |                                                                                                                        | 0.6   | 0.5         | 1.1         | 6.7         |             |
|                                                                                                                        | 0.05 | 0.12        | 0.20        | 0.20        | 0.33        |                                                                                                                        | 0.8   | 0.7         | 1.7         | 10.2        |             |

<sup>a</sup>: Data for method 1 (current study – see Table 7 of the main text for details on the model chemistry).

<sup>b</sup>: Data for method 2 (current study – see Table 7 of the main text for details on the model chemistry).

<sup>c</sup>: Data reported by Ref [4]. NMR calculations (both  $\delta_{\text{H}}$  and  $\delta_{\text{C}}$ ) at the mPW1PW91/6-311+G(2d,p) level with CPCM/UAKE solvent model for chloroform on B3LYP/6-31+G(d,p) geometries. Linear scaling factors were used to convert isotropic magnetic shielding values,  $\sigma_{\text{H}}$  and  $\sigma_{\text{C}}$ , to chemical shifts,  $\delta_{\text{H}}$  and  $\delta_{\text{C}}$ , using the formulas,  $\delta_{\text{H}} = (31.8486 - \sigma_{\text{H}})/1.08225$  and  $\delta_{\text{C}} = (186.060 - \sigma_{\text{C}})/1.04478$ .

<sup>d</sup>: Experimental data from Ref [5] obtained in  $\text{CDCl}_3$  on a 400 MHz NMR spectrometer.

<sup>e</sup>: Results from Machine Learning (ML) / DFT approach that were calculated using an online app at <http://nova.chem.colostate.edu/cascade>; method details are from Ref [6].

<sup>f</sup>: RMSD = root mean square deviation, MD = maximum deviation (largest errors highlighted in blue).

**Table S2.** Comparison of DFT  $\delta_{\text{H}}$  and  $\delta_{\text{C}}$  predictions for  **$\alpha$ -pinene**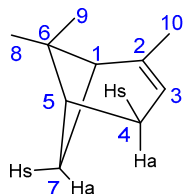 **$\alpha$ -pinene**

| <div>Method: 1<sup>a</sup> 2<sup>b</sup> Lit.<sup>c</sup></div> <div>Expt<sup>d</sup> DFT DFT DFT</div> |      |             |             |             | <div>Method: 1<sup>a</sup> 2<sup>b</sup> Lit.<sup>c</sup></div> <div>Expt<sup>d</sup> DFT DFT DFT</div> |       |              |              |             |
|---------------------------------------------------------------------------------------------------------|------|-------------|-------------|-------------|---------------------------------------------------------------------------------------------------------|-------|--------------|--------------|-------------|
| Atom $\delta_{\text{H}}$ (ppm)                                                                          |      |             |             |             | Atom $\delta_{\text{C}}$ (ppm)                                                                          |       |              |              |             |
| 1                                                                                                       | 1.93 | 2.04        | <b>2.08</b> | 1.39        | 1                                                                                                       | 47.0  | 46.0         | 46.1         | 48.8        |
| 3                                                                                                       | 5.19 | <b>5.38</b> | 5.29        | <b>4.05</b> | 2                                                                                                       | 144.5 | <b>148.0</b> | <b>148.1</b> | 149.3       |
| 4a                                                                                                      | 2.23 | 2.23        | 2.24        | 1.60        | 3                                                                                                       | 116.0 | 119.1        | 118.5        | 120.5       |
| 4s                                                                                                      | 2.16 | 2.15        | 2.23        | 1.62        | 4                                                                                                       | 31.3  | 31.6         | 31.5         | 34.4        |
| 5                                                                                                       | 2.07 | 2.09        | 2.13        | 1.48        | 5                                                                                                       | 40.7  | 39.8         | 39.7         | 44.2        |
| 7a                                                                                                      | 1.15 | 1.19        | 1.11        | 0.81        | 6                                                                                                       | 38.0  | 38.6         | 38.4         | <b>45.4</b> |
| 7s                                                                                                      | 2.33 | 2.25        | 2.25        | 1.66        | 7                                                                                                       | 31.5  | 32.4         | 32.3         | 34.0        |
| 8                                                                                                       | 1.26 | 1.23        | 1.24        | 0.79        | 8                                                                                                       | 26.4  | 26.7         | 26.6         | 26.1        |
| 9                                                                                                       | 0.83 | 0.88        | 0.88        | 0.64        | 9                                                                                                       | 20.8  | 21.5         | 21.4         | 20.5        |
| 10                                                                                                      | 1.66 | 1.71        | 1.75        | 0.98        | 10                                                                                                      | 23.0  | 23.4         | 23.5         | 23.7        |
| RMSD: <sup>c</sup> 0.08 0.08 0.63                                                                       |      |             |             |             | RMSD: <sup>c</sup> 1.6 1.5 3.6                                                                          |       |              |              |             |
| MD: <sup>c</sup> 0.19 0.15 1.14                                                                         |      |             |             |             | MD: <sup>c</sup> 3.5 3.6 7.4                                                                            |       |              |              |             |

<sup>a</sup>: Data for method 1 (current study – see Table 7 of the main text for details on the model chemistry)<sup>b</sup>: Data for method 2 (current study – see Table 7 of the main text for details on the model chemistry)<sup>c</sup>: Calculated chemical shifts from [7]. GIAO NMR calculations from B3LYP (basis set not indicated).Chemical shift referencing using the equation,  $\delta_{\alpha\text{-pinene}} = \sigma_{\text{TMS}} - \sigma_{\alpha\text{-pinene}}$ <sup>d</sup>: Experimental data from [8] at 0.1 M in CDCl<sub>3</sub> at 21–22°C; chemical shift referencing relative to TMS.<sup>e</sup>: RMSD = root mean square deviation, MD = maximum deviation (largest errors highlighted in blue).

**Table S3.** Comparison of DFT  $\delta_{\text{H}}$  and  $\delta_{\text{C}}$  predictions for **aquatolide**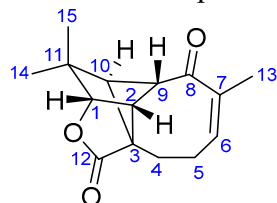

| <div>Method: 1<sup>a</sup> 2<sup>b</sup> Lit.<sup>c</sup></div> <div>Expt<sup>d</sup> DFT DFT DFT</div> |      |      |      |      | <div>Method: 1<sup>a</sup> 2<sup>b</sup> Lit.<sup>c</sup></div> <div>Expt<sup>d</sup> DFT DFT DFT</div> |       |       |       |       |
|---------------------------------------------------------------------------------------------------------|------|------|------|------|---------------------------------------------------------------------------------------------------------|-------|-------|-------|-------|
| Atom $\delta_{\text{H}}$ (ppm)                                                                          |      |      |      |      | Atom $\delta_{\text{C}}$ (ppm)                                                                          |       |       |       |       |
| 1                                                                                                       | 4.48 | 4.39 | 4.40 | 4.21 | 1                                                                                                       | 84.2  | 82.9  | 83.7  | 83.3  |
| 2                                                                                                       | 3.26 | 3.19 | 3.15 | 3.20 | 2                                                                                                       | 54.5  | 53.5  | 53.6  | 54.8  |
| 4a                                                                                                      | 2.52 | 2.49 | 2.54 | 2.48 | 3                                                                                                       | 62.8  | 61.5  | 61.6  | 62.8  |
| 4b                                                                                                      | 1.96 | 1.70 | 1.92 | 1.89 | 4                                                                                                       | 22.2  | 23.5  | 23.0  | 22.5  |
| 5a                                                                                                      | 2.35 | 2.31 | 2.30 | 2.29 | 5                                                                                                       | 28.6  | 29.0  | 28.8  | 30.5  |
| 5b                                                                                                      | 2.03 | 2.08 | 2.09 | 2.08 | 6                                                                                                       | 131.1 | 135.2 | 133.8 | 135.2 |
| 6                                                                                                       | 5.85 | 6.03 | 5.85 | 5.94 | 7                                                                                                       | 135.1 | 138.4 | 138.3 | 138.1 |
| 9                                                                                                       | 2.92 | 2.88 | 2.96 | 2.78 | 8                                                                                                       | 211.9 | 214.1 | 214.4 | 211.9 |
| 10                                                                                                      | 2.64 | 2.63 | 2.64 | 2.49 | 9                                                                                                       | 54.5  | 55.0  | 55.0  | 54.8  |
| 13                                                                                                      | 1.87 | 1.90 | 1.90 | 1.84 | 10                                                                                                      | 62.6  | 62.8  | 62.8  | 63.9  |
| 14                                                                                                      | 1.05 | 0.99 | 1.08 | 0.98 | 11                                                                                                      | 41.9  | 42.5  | 42.2  | 44.6  |
| 15                                                                                                      | 1.19 | 1.16 | 1.17 | 1.09 | 12                                                                                                      | 177.5 | 177.3 | 176.3 | 177.7 |
|                                                                                                         |      |      |      |      | 13                                                                                                      | 22.2  | 24.4  | 24.0  | 23.2  |
|                                                                                                         |      |      |      |      | 14                                                                                                      | 22.6  | 23.6  | 23.6  | 21.1  |
|                                                                                                         |      |      |      |      | 15                                                                                                      | 22.8  | 23.2  | 23.2  | 20.8  |
| RMSD: <sup>e</sup>                                                                                      |      | 0.10 | 0.05 | 0.11 | RMSD: <sup>e</sup>                                                                                      |       | 1.7   | 1.5   | 1.8   |
| MD: <sup>e</sup>                                                                                        |      | 0.26 | 0.11 | 0.27 | MD: <sup>e</sup>                                                                                        |       | 4.1   | 3.2   | 4.1   |

<sup>a</sup>: Data for method 1 (current study – see Table 7 of the main text for details on the model chemistry).

<sup>b</sup>: Data for method 2 (current study – see Table 7 of the main text for details on the model chemistry).

<sup>c</sup>: Data reported by Ref [4]. NMR calculations (both  $\delta_{\text{H}}$  and  $\delta_{\text{C}}$ ) at the mPW1PW91/6-311+G(2d,p) level with CPCM/UAKS solvent model for chloroform on B3LYP/6-31+G(d,p) geometries. Linear scaling factors were used to convert isotropic magnetic shielding values,  $\sigma_{\text{H}}$  and  $\sigma_{\text{C}}$ , to chemical shifts,  $\delta_{\text{H}}$  and  $\delta_{\text{C}}$ , using the formulas,  $\delta_{\text{H}} = (31.8486 - \sigma_{\text{H}})/1.08225$  and  $\delta_{\text{C}} = (186.060 - \sigma_{\text{C}})/1.04478$ .

<sup>d</sup>: Experimental data from Ref [4] in CDCl<sub>3</sub>.

<sup>e</sup>: RMSD = root mean square deviation, MD = maximum deviation (largest errors highlighted in blue).

**Table S4.** Comparison of DFT  $\delta_{\text{H}}$  and  $\delta_{\text{C}}$  predictions for **naupliolide**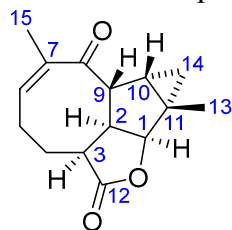

| <div>Method:</div> <div>Expt<sup>d</sup></div> <div>DFT</div> <div>2<sup>b</sup></div> <div>DFT</div> <div>Lit.<sup>c</sup></div> <div>DFT</div> |      |             |             |             | <div>Method:</div> <div>Expt<sup>d</sup></div> <div>DFT</div> <div>2<sup>b</sup></div> <div>DFT</div> <div>Lit.<sup>c</sup></div> <div>DFT</div> |       |              |              |              |
|--------------------------------------------------------------------------------------------------------------------------------------------------|------|-------------|-------------|-------------|--------------------------------------------------------------------------------------------------------------------------------------------------|-------|--------------|--------------|--------------|
| Atom                                                                                                                                             |      |             |             |             | Atom                                                                                                                                             |       |              |              |              |
| $\delta_{\text{H}}$ (ppm)                                                                                                                        |      |             |             |             | $\delta_{\text{C}}$ (ppm)                                                                                                                        |       |              |              |              |
| 1                                                                                                                                                | 4.66 | 4.58        | 4.66        | 4.50        | 1                                                                                                                                                | 89.1  | 88.2         | 89.8         | 88.3         |
| 2                                                                                                                                                | 2.59 | 2.44        | <b>2.39</b> | 2.49        | 2                                                                                                                                                | 42.0  | 43.8         | 42.8         | 45.2         |
| 3                                                                                                                                                | 2.94 | 2.76        | 2.94        | 2.85        | 3                                                                                                                                                | 43.4  | 44.8         | 43.8         | 45.2         |
| 4a                                                                                                                                               | 1.79 | 1.70        | 1.68        | 1.60        | 4                                                                                                                                                | 23.0  | 24.8         | 24.2         | 25.0         |
| 4b                                                                                                                                               | 2.39 | 2.37        | 2.32        | 2.34        | 5                                                                                                                                                | 25.3  | 26.1         | 24.9         | 25.0         |
| 5a                                                                                                                                               | 2.30 | 2.16        | 2.40        | 2.30        | 6                                                                                                                                                | 138.7 | <b>144.2</b> | <b>144.3</b> | <b>146.5</b> |
| 5b                                                                                                                                               | 2.54 | 2.60        | 2.60        | 2.59        | 7                                                                                                                                                | 136.1 | 138.2        | 137.3        | 140.1        |
| 6                                                                                                                                                | 6.34 | 6.54        | 6.53        | 6.74        | 8                                                                                                                                                | 203.8 | 206.7        | 203.6        | 203.5        |
| 9                                                                                                                                                | 3.66 | 3.64        | 3.74        | 3.87        | 9                                                                                                                                                | 51.9  | 50.0         | 51.9         | 48.1         |
| 10                                                                                                                                               | 1.61 | 1.47        | 1.50        | 1.33        | 10                                                                                                                                               | 28.4  | 31.1         | 30.2         | 32.2         |
| 13 <sup>e</sup>                                                                                                                                  | 1.34 | 1.29        | 1.34        | 1.28        | 11                                                                                                                                               | 25.3  | 26.3         | 26.4         | 28.0         |
| 14a                                                                                                                                              | 0.57 | 0.67        | 0.72        | <b>1.15</b> | 12                                                                                                                                               | 177.0 | 175.8        | 175.0        | 176.8        |
| 14b                                                                                                                                              | 0.64 | <b>0.97</b> | 0.71        | 0.61        | 13                                                                                                                                               | 16.1  | 17.1         | 17.1         | 15.5         |
| 15 <sup>e</sup>                                                                                                                                  | 1.84 | 1.85        | 1.88        | 1.77        | 14                                                                                                                                               | 13.2  | 15.0         | 14.8         | 14.4         |
|                                                                                                                                                  |      |             |             |             | 15                                                                                                                                               | 21.0  | 24.3         | 23.8         | 21.7         |
| RMSD: <sup>c</sup>                                                                                                                               |      |             |             |             | RMSD: <sup>c</sup>                                                                                                                               |       |              |              |              |
| MD: <sup>c</sup>                                                                                                                                 |      |             |             |             | MD: <sup>c</sup>                                                                                                                                 |       |              |              |              |

<sup>a</sup>: Data for method 1 (current study – see Table 7 of the main text for details on the model chemistry).

<sup>b</sup>: Data for method 2 (current study – see Table 7 of the main text for details on the model chemistry).

<sup>c</sup>: Data reported by Ref [4]. NMR calculations (both  $\delta_{\text{H}}$  and  $\delta_{\text{C}}$ ) at the mPW1PW91/6-311+G(2d,p) level with CPCM/UAKS solvent model for chloroform on B3LYP/6-31+G(d,p) geometries. Linear scaling factors were used to convert isotropic magnetic shielding values,  $\sigma_{\text{H}}$  and  $\sigma_{\text{C}}$ , to chemical shifts,  $\delta_{\text{H}}$  and  $\delta_{\text{C}}$ , using the formulas,  $\delta_{\text{H}} = (31.8486 - \sigma_{\text{H}})/1.08225$  and  $\delta_{\text{C}} = (186.060 - \sigma_{\text{C}})/1.04478$ .

<sup>d</sup>: Experimental data from Ref [9] in  $\text{CDCl}_3$ .

<sup>e</sup>: Note that DFT predictions suggest a misassignment of the chemical shifts, H13 and H15.

<sup>e</sup>: RMSD = root mean square deviation, MD = maximum deviation (largest errors highlighted in blue).

**Table S5.** Comparison of DFT  $\delta_H$  and  $\delta_C$  predictions for **echinopine B**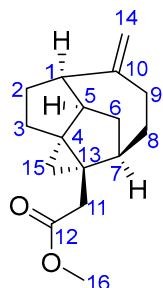

| <div>Method:</div> <div>Expt<sup>d</sup></div> <div>1<sup>a</sup></div> <div>2<sup>b</sup></div> <div>Lit<sup>c</sup></div> <div>DFT</div> <div>DFT</div> <div>DFT</div> |      |             |             |             | <div>Method:</div> <div>Expt<sup>d</sup></div> <div>1<sup>a</sup></div> <div>2<sup>b</sup></div> <div>Lit<sup>c</sup></div> <div>DFT</div> <div>DFT</div> <div>DFT</div> |                         |             |             |             |
|--------------------------------------------------------------------------------------------------------------------------------------------------------------------------|------|-------------|-------------|-------------|--------------------------------------------------------------------------------------------------------------------------------------------------------------------------|-------------------------|-------------|-------------|-------------|
| Atom                                                                                                                                                                     |      |             |             |             | Atom                                                                                                                                                                     |                         |             |             |             |
| $\delta_H$ (ppm)                                                                                                                                                         |      |             |             |             | $\delta_C$ (ppm)                                                                                                                                                         |                         |             |             |             |
| 1                                                                                                                                                                        | 2.80 | 2.72        | 2.82        | 2.86        | 1                                                                                                                                                                        | 48.5                    | 50.0        | 50.0        | 51.2        |
| 2a                                                                                                                                                                       | 2.14 | 2.10        | 2.13        | 2.14        | 2                                                                                                                                                                        | 30.9                    | 31.8        | 31.7        | 31.6        |
| 2b                                                                                                                                                                       | 1.65 | 1.55        | 1.71        | 1.59        | 3                                                                                                                                                                        | 25.4                    | 27.4        | 27.2        | 27.7        |
| 3a                                                                                                                                                                       | 1.93 | 2.01        | 1.95        | 1.92        | 4                                                                                                                                                                        | <b>41.0<sup>e</sup></b> | 43.6        | 43.4        | <b>46.5</b> |
| 3b                                                                                                                                                                       | 1.51 | 1.51        | 1.53        | 1.57        | 5                                                                                                                                                                        | 48.4                    | 49.8        | 49.8        | 50.0        |
| 5                                                                                                                                                                        | 2.25 | 2.29        | 2.31        | 2.24        | 6                                                                                                                                                                        | 30.3                    | 31.5        | 31.3        | 30.7        |
| 6a                                                                                                                                                                       | 1.44 | 1.37        | 1.41        | 1.45        | 7                                                                                                                                                                        | 40.4                    | 41.4        | 41.1        | 42.7        |
| 6b                                                                                                                                                                       | 1.35 | 1.31        | 1.40        | 1.40        | 8                                                                                                                                                                        | 32.5                    | 32.9        | 32.9        | 33.1        |
| 7                                                                                                                                                                        | 2.39 | 2.39        | 2.32        | 2.22        | 9                                                                                                                                                                        | 29.3                    | 30.0        | 29.7        | 30.5        |
| 8a                                                                                                                                                                       | 1.93 | 2.00        | 2.09        | 1.92        | 10                                                                                                                                                                       | 154.3                   | 155.6       | 156.1       | 158.6       |
| 8b                                                                                                                                                                       | 1.26 | 1.22        | 1.33        | 1.29        | 11                                                                                                                                                                       | 35.1                    | 36.5        | 36.4        | 35.6        |
| 9a                                                                                                                                                                       | 2.11 | 2.07        | 2.11        | 2.08        | 12                                                                                                                                                                       | 173.7                   | 173.7       | 173.0       | 174.9       |
| 9b                                                                                                                                                                       | 1.82 | <b>1.99</b> | <b>2.04</b> | <b>2.04</b> | 13                                                                                                                                                                       | <b>29.8<sup>e</sup></b> | <b>32.0</b> | <b>32.3</b> | 34.9        |
| 11a                                                                                                                                                                      | 2.65 | 2.62        | 2.70        | 2.63        | 14                                                                                                                                                                       | 111.9                   | 113.6       | 113.2       | 111.4       |
| 11b                                                                                                                                                                      | 1.72 | 1.84        | 1.84        | 1.57        | 15                                                                                                                                                                       | 15.7                    | 17.2        | 17.2        | 15.1        |
| 14a                                                                                                                                                                      | 4.63 | 4.70        | 4.73        | 4.68        | 16                                                                                                                                                                       | 51.3                    | 51.7        | 52.3        | 50.7        |
| 14b                                                                                                                                                                      | 4.60 | 4.66        | 4.66        | 4.65        |                                                                                                                                                                          |                         |             |             |             |
| 15a                                                                                                                                                                      | 0.69 | 0.68        | 0.74        | 0.73        |                                                                                                                                                                          |                         |             |             |             |
| 15b                                                                                                                                                                      | 0.47 | 0.53        | 0.57        | 0.59        |                                                                                                                                                                          |                         |             |             |             |
| 16                                                                                                                                                                       | 3.68 | 3.65        | 3.64        | 3.46        |                                                                                                                                                                          |                         |             |             |             |
| RMSD: <sup>f</sup>                                                                                                                                                       |      |             |             |             | RMSD: <sup>f</sup>                                                                                                                                                       |                         |             |             |             |
| MD: <sup>f</sup>                                                                                                                                                         |      |             |             |             | MD: <sup>f</sup>                                                                                                                                                         |                         |             |             |             |
|                                                                                                                                                                          |      |             |             |             |                                                                                                                                                                          |                         |             |             |             |

<sup>a</sup>: Data for method 1 (current study – see Table 7 of the main text for details on the model chemistry)

<sup>b</sup>: Data for method 2 (current study – see Table 7 of the main text for details on the model chemistry)

<sup>c</sup>: Calculated chemical shifts from Ref [4]. NMR calculations (both  $\delta_H$  and  $\delta_C$ ) at the mPW1PW91/6-311+G(2d,p) level with CPCM/UAKS solvent model for chloroform on B3LYP/6-31+G(d,p) geometries. Linear scaling factors were used to convert isotropic magnetic shielding values,  $\sigma_H$  and  $\sigma_C$ , to chemical shifts,  $\delta_H$  and  $\delta_C$ , using the formulas,  $\delta_H = (31.8486 - \sigma_H)/1.08225$  and  $\delta_C = (186.060 - \sigma_C)/1.04478$ .

<sup>d</sup>: Experimental  $^1H$  and  $^{13}C$  NMR data acquired in  $CDCl_3$  on a 500 MHz NMR spectrometer [10].

<sup>e</sup>: The  $\delta_C$  chemical shifts for atoms 4 and 13 appear to be misassigned in the original experimental report [10]. They were swapped here based on the DFT predictions, which was also performed in the previous DFT paper from Ref [4].

<sup>f</sup>: RMSD = root mean square deviation, MD = maximum deviation (largest errors highlighted in blue).

**Table S6.** Comparison of DFT  $\delta_{\text{H}}$  and  $\delta_{\text{C}}$  predictions for **parthenolide**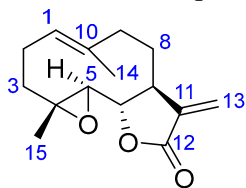

| Method: $\delta_{\text{H}}$ (ppm) |                        |                       |                       | Method: $\delta_{\text{C}}$ (ppm) |                   |                       |                       |
|-----------------------------------|------------------------|-----------------------|-----------------------|-----------------------------------|-------------------|-----------------------|-----------------------|
| Atom                              | Expt <sup>c</sup>      | 1 <sup>a</sup><br>DFT | 2 <sup>b</sup><br>DFT | Atom                              | Expt <sup>c</sup> | 1 <sup>a</sup><br>DFT | 2 <sup>b</sup><br>DFT |
| 1                                 | 5.21                   | 5.23                  | 5.21                  | 1                                 | 125.3             | 126.7                 | 126.5                 |
| 2a                                | 2.11-2.21 <sup>d</sup> | 2.20                  | 2.25                  | 2                                 | 24.1              | 25.3                  | 25.1                  |
| 2b                                | 2.32-2.49 <sup>d</sup> | 2.36                  | 2.42                  | 3                                 | 36.3              | 37.2                  | 36.8                  |
| 3a                                | 1.20-1.28 <sup>d</sup> | 1.29                  | 1.30                  | 4                                 | 61.5              | 61.3                  | 62.2                  |
| 3b                                | 2.11-2.21 <sup>d</sup> | 2.01                  | 2.09                  | 5                                 | 66.4              | 66.9                  | 67.0                  |
| 5                                 | 2.79                   | <b>2.65</b>           | 2.76                  | 6                                 | 82.4              | 82.6                  | 83.7                  |
| 6                                 | 3.86                   | 3.73                  | <b>3.90</b>           | 7                                 | 47.7              | 49.3                  | 48.8                  |
| 7                                 | 2.74-2.82 <sup>d</sup> | 2.74                  | 2.77                  | 8                                 | 30.6              | 32.5                  | 32.1                  |
| 8a                                | 2.11-2.21 <sup>d</sup> | 2.01                  | 2.01                  | 9                                 | 41.2              | 41.9                  | 41.9                  |
| 8b                                | 1.70-1.77 <sup>d</sup> | 1.69                  | 1.81                  | 10                                | 134.6             | 137.2                 | 136.8                 |
| 9a                                | 2.11-2.21 <sup>d</sup> | 2.14                  | 2.13                  | 11                                | 139.2             | 141.2                 | 141.2                 |
| 9b                                | 2.32-2.44 <sup>d</sup> | 2.37                  | 2.33                  | 12                                | 169.3             | 168.1                 | 167.6                 |
| 13a                               | 6.34                   | 6.41                  | 6.34                  | 13                                | 121.3             | <b>124.3</b>          | <b>124.1</b>          |
| 13b                               | 5.62                   | 5.65                  | 5.60                  | 14                                | 16.9              | 17.9                  | 18.2                  |
| 14                                | 1.72                   | 1.73                  | 1.73                  | 15                                | 17.3              | 18.2                  | 18.3                  |
| 15                                | 1.31                   | 1.23                  | 1.29                  |                                   |                   |                       |                       |
| RMSD: <sup>e</sup>                |                        |                       |                       | RMSD: <sup>e</sup>                |                   |                       |                       |
| MD: <sup>e</sup>                  |                        |                       |                       | MD: <sup>e</sup>                  |                   |                       |                       |
|                                   |                        |                       |                       |                                   |                   |                       |                       |

<sup>a</sup>: Data for method 1 (current study – see Table 7 of the main text for details on the model chemistry)

<sup>b</sup>: Data for method 2 (current study – see Table 7 of the main text for details on the model chemistry)

<sup>c</sup>: Experimental NMR data obtained in CDCl<sub>3</sub> on a 300 MHz NMR spectrometer [11].

<sup>d</sup>: Proton chemical shift multiplets were reported as a range, and thus they are not included in RMSD and MD calculations.

<sup>e</sup>: RMSD = root mean square deviation, MD = maximum deviation (largest errors highlighted in blue).



**Table S7.** Comparison of DFT  $\delta_H$  and  $\delta_C$  predictions for **diepoxyguaiaolide**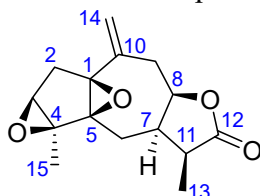

| Protons ( $\delta_H$ ) |                              |                       |                       |                         | Carbons ( $\delta_C$ ) |                              |                       |                       |                         |
|------------------------|------------------------------|-----------------------|-----------------------|-------------------------|------------------------|------------------------------|-----------------------|-----------------------|-------------------------|
| Atom                   | Method:<br>Expt <sup>d</sup> | 1 <sup>a</sup><br>DFT | 2 <sup>b</sup><br>DFT | Lit <sup>c</sup><br>DFT | Atom                   | Method:<br>Expt <sup>d</sup> | 1 <sup>a</sup><br>DFT | 2 <sup>b</sup><br>DFT | Lit <sup>c</sup><br>DFT |
| 2a                     | 2.11                         | <b>1.90</b>           | 2.08                  | <b>1.67</b>             | 1                      | 77.2                         | 78.5                  | 78.8                  | 77.6                    |
| 2b                     | 2.15                         | 2.05                  | 2.11                  | 2.01                    | 2                      | 27.9                         | 27.5                  | 27.4                  | 26.9                    |
| 3                      | 3.50                         | 3.35                  | 3.45                  | 3.32                    | 3                      | 66.7                         | 67.1                  | 67.8                  | 65.8                    |
| 6a                     | 2.35                         | 2.32                  | 2.32                  | 2.20                    | 4                      | 61.3                         | 62.0                  | 62.7                  | 60.9                    |
| 6b                     | 1.79                         | 1.71                  | 1.81                  | 1.83                    | 5                      | 67.5                         | 69.4                  | 69.9                  | 68.4                    |
| 7                      | 2.55                         | 2.44                  | 2.46                  | 2.27                    | 6                      | 21.0                         | 23.7                  | 23.1                  | 23.4                    |
| 8                      | 4.36                         | 4.16                  | 4.34                  | 4.22                    | 7                      | 41.1                         | 42.2                  | 42.0                  | 42.4                    |
| 9a                     | 2.60                         | 2.51                  | 2.57                  | 2.62                    | 8                      | 79.5                         | 79.3                  | 80.4                  | 78.7                    |
| 9b                     | 2.40                         | 2.30                  | <b>2.52</b>           | 2.55                    | 9                      | 32.2                         | 33.6                  | 33.5                  | 33.3                    |
| 11                     | 2.88                         | 2.73                  | 2.88                  | 2.59                    | 10                     | 139.1                        | <b>143.2</b>          | <b>143.2</b>          | <b>141.7</b>            |
| 13                     | 1.25                         | 1.21                  | 1.25                  | 1.25                    | 11                     | 38.8                         | 40.7                  | 40.4                  | 39.8                    |
| 14a                    | 5.30                         | 5.35                  | 5.27                  | 5.41                    | 12                     | 177.5                        | 176.3                 | 175.7                 | 175.7                   |
| 14b                    | 5.26                         | 5.21                  | 5.24                  | 5.29                    | 13                     | 10.2                         | 12.0                  | 11.9                  | 11.2                    |
| 15                     | 1.57                         | 1.51                  | 1.50                  | 1.48                    | 14                     | 119.1                        | 119.6                 | 119.7                 | 117.6                   |
|                        |                              |                       |                       |                         | 15                     | 16.3                         | 17.2                  | 17.2                  | 16.8                    |
| RMSD: <sup>c</sup>     |                              | 0.12                  | 0.05                  | 0.18                    | RMSD: <sup>c</sup>     |                              | 1.7                   | 1.8                   | 1.3                     |
| MD: <sup>c</sup>       |                              | 0.21                  | 0.12                  | 0.44                    | MD: <sup>c</sup>       |                              | 4.1                   | 4.1                   | 2.6                     |

<sup>a</sup>: Data for method 1 (current study – see Table 7 of the main text for details on the model chemistry)

<sup>b</sup>: Data for method 2 (current study – see Table 7 of the main text for details on the model chemistry)

<sup>c</sup>: Calculated chemical shifts from ref. [12] using parametric/DFT hybrid method, DU8+, which is wB97X-D/6-31G(d)//B3LYP/6-31G(d) calculations and conversion of shieldings to chemical shifts according to ref. [13].

<sup>d</sup>: Experimental NMR data from ref. [14] at 400 MHz / 100 MHz (<sup>1</sup>H / <sup>13</sup>C) in CDCl<sub>3</sub>; chemical shift referencing relative to TMS.

<sup>e</sup>: RMSD = root mean square deviation, MD = maximum deviation (largest errors highlighted in blue).

**Table S8.** Comparison of DFT  $\delta_{\text{H}}$  and  $\delta_{\text{C}}$  predictions for **cannabicitran (CBT-C)**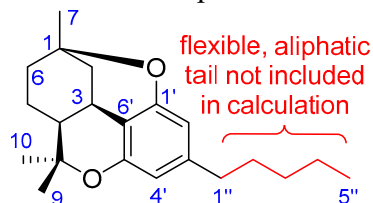

| <div>Method:</div> <div>Expt<sup>d</sup></div> <div>1<sup>a</sup></div> <div>2<sup>b</sup></div> <div>Lit.<sup>c</sup></div> <div>DFT</div> <div>DFT</div> <div>DFT</div> |      |             |             |             | <div>Method:</div> <div>Expt<sup>d</sup></div> <div>1<sup>a</sup></div> <div>2<sup>b</sup></div> <div>Lit.<sup>c</sup></div> <div>DFT</div> <div>DFT</div> <div>DFT</div> |       |             |             |             |
|---------------------------------------------------------------------------------------------------------------------------------------------------------------------------|------|-------------|-------------|-------------|---------------------------------------------------------------------------------------------------------------------------------------------------------------------------|-------|-------------|-------------|-------------|
| Atom $\delta_{\text{H}}$ (ppm)                                                                                                                                            |      |             |             |             | Atom $\delta_{\text{C}}$ (ppm)                                                                                                                                            |       |             |             |             |
| 2 eq                                                                                                                                                                      | 2.23 | 2.10        | 2.21        | 2.17        | 1                                                                                                                                                                         | 74.4  | 73.8        | 74.7        | 73.7        |
| 2 ax                                                                                                                                                                      | 1.83 | 1.82        | 1.84        | 1.71        | 2                                                                                                                                                                         | 35.4  | 35.6        | 35.5        | 34.3        |
| 3                                                                                                                                                                         | 2.86 | 2.73        | 2.84        | 2.78        | 3                                                                                                                                                                         | 28.1  | <b>30.3</b> | <b>30.3</b> | 28.5        |
| 4                                                                                                                                                                         | 2.03 | 2.20        | 2.16        | 1.93        | 4                                                                                                                                                                         | 46.8  | 48.0        | 47.9        | 47.2        |
| 5 eq                                                                                                                                                                      | 1.24 | 1.14        | 1.19        | 1.13        | 5                                                                                                                                                                         | 22.1  | 23.2        | 22.9        | 22.7        |
| 5 ax                                                                                                                                                                      | 0.61 | 0.52        | 0.56        | <b>0.92</b> | 6                                                                                                                                                                         | 37.3  | 37.2        | 37.0        | 37.3        |
| 6 eq                                                                                                                                                                      | 1.77 | 1.67        | 1.71        | 1.71        | 7                                                                                                                                                                         | 29.1  | 30.2        | 30.0        | 27.2        |
| 6 ax                                                                                                                                                                      | 1.42 | 1.41        | 1.48        | 1.37        | 8                                                                                                                                                                         | 83.5  | 83.3        | 84.5        | 83.2        |
| 7                                                                                                                                                                         | 1.38 | 1.33        | 1.35        | 1.26        | 9                                                                                                                                                                         | 23.7  | 25.0        | 24.8        | <b>21.7</b> |
| 9                                                                                                                                                                         | 1.02 | 1.00        | 1.00        | 0.98        | 10                                                                                                                                                                        | 29.7  | 31.1        | 30.7        | <b>27.7</b> |
| 10                                                                                                                                                                        | 1.53 | 1.47        | 1.47        | 1.39        | 1'                                                                                                                                                                        | 156.5 | 156.7       | 157.8       | 156.8       |
| 2'                                                                                                                                                                        | 6.33 | <b>6.16</b> | 6.28        | 6.31        | 2'                                                                                                                                                                        | 108.9 | 109.0       | 109.0       | 109.4       |
| 4'                                                                                                                                                                        | 6.29 | 6.14        | <b>6.12</b> | 6.31        | 4'                                                                                                                                                                        | 109.7 | 109.8       | 110.0       | 109.9       |
|                                                                                                                                                                           |      |             |             |             | 5'                                                                                                                                                                        | 156.9 | 157.5       | 157.8       | 158.0       |
|                                                                                                                                                                           |      |             |             |             | 6'                                                                                                                                                                        | 114.0 | 114.1       | 114.4       | 112.8       |
| RMSD: <sup>e</sup>                                                                                                                                                        |      |             |             |             | RMSD: <sup>e</sup>                                                                                                                                                        |       |             |             |             |
| MD: <sup>e</sup>                                                                                                                                                          |      |             |             |             | MD: <sup>e</sup>                                                                                                                                                          |       |             |             |             |
|                                                                                                                                                                           |      |             |             |             |                                                                                                                                                                           |       |             |             |             |

<sup>a</sup>: Data for method 1 (current study – see Table 7 of the main text for details on the model chemistry).

<sup>b</sup>: Data for method 2 (current study – see Table 7 of the main text for details on the model chemistry).

<sup>b</sup>: Calculated results by Wood, *et. al.* [15]. The best performance for  $\delta_{\text{H}}$  was obtained from NMR calculations *in vacuo* at the B3LYP/6-31+G(d,p) level, while the best performance for  $\delta_{\text{C}}$  was provided from NMR calculations *in vacuo* at the mPW1PW91/6-311+G(d,p) level. B3LYP/6-31+G(d,p) was used for geometry optimizations in the gas phase for both  $\delta_{\text{H}}$  and  $\delta_{\text{C}}$ . Linear scaling factors were used to convert isotropic magnetic shielding values,  $\sigma_{\text{H}}$  and  $\sigma_{\text{C}}$ , to chemical shifts,  $\delta_{\text{H}}$  and  $\delta_{\text{C}}$ , using the scaling factors provided by Lodewyk, *et. al.* [16].

<sup>d</sup>: Experimental data obtained at 25°C on a 600 MHz NMR spectrometer from Ref [15] for a 2.0 mg sample dissolved in 0.15 mL CDCl<sub>3</sub>.

<sup>e</sup>: RMSD = root mean square deviation, MD = maximum deviation (largest errors highlighted in blue).

**Table S9.** Comparison of DFT  $\delta_{\text{H}}$  and  $\delta_{\text{C}}$  predictions for **ingenane diterpene 8**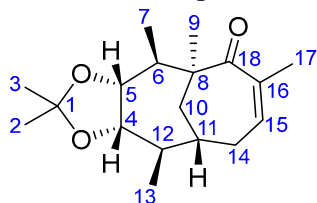

| Atom                      | Method:<br>Expt <sup>d</sup> | 1 <sup>a</sup><br>DFT | 2 <sup>b</sup><br>DFT | Lit <sup>c</sup><br>DFT | Atom                      | Method:<br>Expt <sup>d</sup> | 1 <sup>a</sup><br>DFT | 2 <sup>b</sup><br>DFT | Lit <sup>c</sup><br>DFT |
|---------------------------|------------------------------|-----------------------|-----------------------|-------------------------|---------------------------|------------------------------|-----------------------|-----------------------|-------------------------|
| $\delta_{\text{H}}$ (ppm) |                              |                       |                       |                         | $\delta_{\text{C}}$ (ppm) |                              |                       |                       |                         |
| 2                         | 1.48 (s, 3H)                 | 1.43                  | 1.47                  | 1.49                    | 1                         | 106.8                        | 107.5                 | 107.7                 | 106.9                   |
| 3                         | 1.34 (s, 3H)                 | 1.27                  | 1.33                  | 1.23                    | 2                         | 28.5 <sup>e</sup>            | 29.3                  | 29.2                  | 24.6                    |
| 4                         | 3.95 (t, 4.5 Hz, 1H)         | 3.68                  | 3.87                  | 3.95                    | 3                         | 25.3 <sup>e</sup>            | 26.2                  | 26.2                  | 24.2                    |
| 5                         | 4.10 (dd, 8.5, 5.0 Hz, 1H)   | 4.04                  | 4.14                  | <b>3.90</b>             | 4                         | 87.2                         | 84.2                  | 85.7                  | 86.8                    |
| 6                         | 2.25 (m, 1H)                 | 2.19                  | 2.22                  | 2.15                    | 5                         | 84.0                         | 84.5                  | 83.9                  | 83.6                    |
| 7                         | 1.39 (d, 7.5 Hz, 3H)         | 1.29                  | 1.40                  | 1.35                    | 6                         | 47.1 <sup>e</sup>            | 46.6                  | 47.2                  | 51.6                    |
| 9                         | 1.09 (s, 3H)                 | 1.25                  | 1.18                  | 1.03                    | 7                         | 15.9                         | 19.2                  | 17.9                  | 13.5                    |
| 10                        | 1.74 <sup>e,f</sup> (m, 2H)  | 1.83 <sup>f</sup>     | 1.89 <sup>f</sup>     | -                       | 8                         | 55.3                         | 56.8                  | 56.5                  | <b>59.2</b>             |
| 11                        | 1.27 <sup>e</sup> (m, 2H)    | 1.24                  | 1.22                  | -                       | 9                         | 28.5 <sup>e</sup>            | 30.7                  | 29.1                  | 27.2                    |
| 12                        | 1.86 <sup>e</sup> (m, 1H)    | 1.72                  | 1.90                  | 1.86                    | 10                        | 42.9 <sup>e</sup>            | 44.3                  | 44.7                  | 44.1                    |
| 13                        | 1.01 (d, 7.0 Hz, 3H)         | 0.96                  | 1.00                  | 0.98                    | 11                        | 41.4 <sup>e</sup>            | 39.8                  | 41.0                  | 41.6                    |
| 14                        | 1.93 <sup>e,f</sup> (m, 2H)  | 2.11 <sup>f</sup>     | 2.13 <sup>f</sup>     | 1.89 <sup>f</sup>       | 12                        | 46.0 <sup>e</sup>            | 45.5                  | 43.7                  | 45.3                    |
| 15                        | 6.06 (m, 1H)                 | <b>6.45</b>           | <b>6.20</b>           | 6.04                    | 13                        | 18.9                         | 19.5                  | 19.8                  | 17.6                    |
| 17                        | 1.89 (s, 3H)                 | 1.92                  | 1.96                  | 1.92                    | 14                        | 36.0                         | 37.2                  | 36.7                  | 37.4                    |
|                           |                              |                       |                       |                         | 15                        | 138.0                        | <b>142.5</b>          | 140.2                 | 141.7                   |
|                           |                              |                       |                       |                         | 16                        | 135.3                        | 139.5                 | <b>140.0</b>          | 138.5                   |
|                           |                              |                       |                       |                         | 17                        | 23.5 <sup>e</sup>            | 26.2                  | 25.7                  | 23.5                    |
|                           |                              |                       |                       |                         | 18                        | 211.3                        | 214.5                 | 214.4                 | 211.8                   |
| RMSD: <sup>f</sup>        |                              | 0.17                  | 0.06                  | 0.08                    | RMSD: <sup>f</sup>        |                              | 2.7                   | 2.2                   | 2.2                     |
| MD: <sup>f</sup>          |                              | 0.39                  | 0.14                  | 0.20                    | MD: <sup>f</sup>          |                              | 4.5                   | 4.7                   | 3.9                     |

<sup>a</sup>: Data for method 1 (current study – see Table 7 of the main text for details on the model chemistry)

<sup>b</sup>: Data for method 2 (current study – see Table 7 of the main text for details on the model chemistry)

<sup>c</sup>: Calculated chemical shifts from [4]. NMR calculations (both  $\delta_{\text{H}}$  and  $\delta_{\text{C}}$ ) at the mPW1PW91/6-311+G(2d,p) level with CPCM/UAKE solvent model for chloroform on B3LYP/6-31+G(d,p) geometries. Linear scaling factors were used to convert isotropic magnetic shielding values,  $\sigma_{\text{H}}$  and  $\sigma_{\text{C}}$ , to chemical shifts,  $\delta_{\text{H}}$  and  $\delta_{\text{C}}$ , using the formulas,  $\delta_{\text{H}} = (31.8486 - \sigma_{\text{H}})/1.08225$  and  $\delta_{\text{C}} = (186.060 - \sigma_{\text{C}})/1.04478$ .

<sup>d</sup>: Experimental  $^1\text{H}$  and  $^{13}\text{C}$  NMR data in ppm for a sample dissolved in  $\text{CDCl}_3$  [17].

<sup>e</sup>: Assignments are ambiguous and thus not included in RMSD and MD calculations.

<sup>f</sup>:  $\text{CH}_2$   $^1\text{H}$  chemical shifts were averaged in experimental assignments; the same was done with DFT predictions [4].

<sup>g</sup>: RMSD = root mean square deviation, MD = maximum deviation (largest errors highlighted in blue).

**Table S10.** Comparison of DFT  $\delta_{\text{H}}$  and  $\delta_{\text{C}}$  predictions for **artemisinin**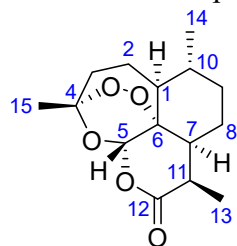

| Method: 1 <sup>a</sup> 2 <sup>b</sup> |                           |             |             | Method: 1 <sup>a</sup> 2 <sup>b</sup> Lit. <sup>c</sup> |                           |             |                         |
|---------------------------------------|---------------------------|-------------|-------------|---------------------------------------------------------|---------------------------|-------------|-------------------------|
| Expt <sup>d</sup> DFT DFT             |                           |             |             | Expt <sup>d</sup> DFT DFT DFT                           |                           |             |                         |
| Atom                                  | $\delta_{\text{H}}$ (ppm) |             |             | Atom                                                    | $\delta_{\text{C}}$ (ppm) |             |                         |
| 1                                     | 1.40                      | 1.47        | 1.57        | 1                                                       | 50.3                      | 50.5        | 50.1 -                  |
| 2 $\alpha$                            | 2.07                      | 1.84        | <b>1.83</b> | 2                                                       | 25.0                      | 26.0        | 25.8 -                  |
| 2 $\beta$                             | 1.45                      | 1.46        | 1.67        | 3                                                       | 36.1                      | 35.9        | 35.4 -                  |
| 3 $\alpha$                            | 2.44                      | 2.39        | 2.47        | 4                                                       | 105.3                     | 105.0       | 105.9 106.3             |
| 3 $\beta$                             | 2.03                      | 2.03        | 2.08        | 5                                                       | 93.8                      | 92.5        | 93.7 93.5               |
| 5                                     | 5.86                      | <b>5.61</b> | 5.75        | 6                                                       | 79.6                      | <b>81.7</b> | <b>81.9</b> <b>81.0</b> |
| 7                                     | 1.78                      | 1.82        | 1.83        | 7                                                       | 45.1                      | 46.0        | 45.7 46.0               |
| 8 $\alpha$                            | 1.87                      | 1.85        | 1.77        | 8                                                       | 23.4                      | 24.1        | 24.0 -                  |
| 8 $\beta$                             | 1.09                      | 1.04        | 1.22        | 9                                                       | 33.8                      | 33.8        | 33.7 -                  |
| 9 $\alpha$                            | 1.78                      | 1.66        | 1.62        | 10                                                      | 37.6                      | 37.6        | 37.6 -                  |
| 9 $\beta$                             | 1.09                      | 1.05        | 1.09        | 11                                                      | 33.0                      | 34.7        | 34.3 32.5               |
| 10                                    | 1.45                      | 1.38        | 1.50        | 12                                                      | 171.5                     | 170.5       | 170.2 171.9             |
| 11                                    | 3.40                      | 3.27        | 3.34        | 13                                                      | 12.5                      | 14.5        | 14.5 -                  |
| 13                                    | 1.21                      | 1.19        | 1.20        | 14                                                      | 19.8                      | 21.2        | 21.2 -                  |
| 14                                    | 1.00                      | 0.96        | 1.04        | 15                                                      | 25.2                      | 25.8        | 25.4 -                  |
| 15                                    | 1.45                      | 1.39        | 1.46        |                                                         |                           |             |                         |
| RMSD: <sup>c</sup>                    |                           |             |             | RMSD: <sup>c</sup>                                      |                           |             |                         |
| MD: <sup>c</sup>                      |                           |             |             | MD: <sup>c</sup>                                        |                           |             |                         |
| 0.10 0.12                             |                           |             |             | 1.1 1.1 0.8                                             |                           |             |                         |
| 0.25 0.24                             |                           |             |             | 2.1 2.3 1.4                                             |                           |             |                         |

<sup>a</sup>: Data for method 1 (current study – see Table 7 of the main text for details on the model chemistry).

<sup>b</sup>: Data for method 2 (current study – see Table 7 of the main text for details on the model chemistry).

<sup>c</sup>: Calculated data from Ref [18]. NMR calculations ( $\delta_{\text{C}}$  only) using CSGT method at the B3LYP/6-311+G(2d,p) level on B3LYP/6-31G(d,p) geometries. Isotropic shielding values were converted to chemical shifts by subtracting the shielding from the calculated value for TMS. Note that only six  $\delta_{\text{C}}$  values were reported.

<sup>d</sup>: Experimental data acquired on a 400 MHz NMR spectrometer at 25°C in CDCl<sub>3</sub> for 0.14 M and 1 M samples for <sup>1</sup>H and <sup>13</sup>C, respectively [19].

<sup>e</sup>: RMSD = root mean square deviation, MD = maximum deviation (largest errors highlighted in blue).

**Table S11.** Comparison of DFT  $\delta_{\text{H}}$  and  $\delta_{\text{C}}$  predictions for **nobilisitine A**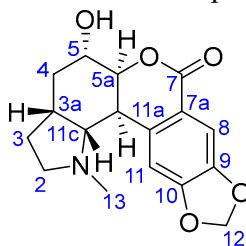

| <div>Method:</div> <div>Expt<sup>d</sup></div> <div>1<sup>a</sup></div> <div>2<sup>b</sup></div> <div>Lit<sup>c</sup></div> |      |             |             |             | <div>Method:</div> <div>Expt<sup>d</sup></div> <div>1<sup>a</sup></div> <div>2<sup>b</sup></div> <div>Lit<sup>c</sup></div> |       |              |              |              |
|-----------------------------------------------------------------------------------------------------------------------------|------|-------------|-------------|-------------|-----------------------------------------------------------------------------------------------------------------------------|-------|--------------|--------------|--------------|
| $\delta_{\text{H}}$ (ppm)                                                                                                   |      |             |             |             | $\delta_{\text{C}}$ (ppm)                                                                                                   |       |              |              |              |
| Atom                                                                                                                        |      | DFT         | DFT         | DFT         | Atom                                                                                                                        |       | DFT          | DFT          | DFT          |
| 2 $\alpha$                                                                                                                  | 3.24 | 3.10        | 3.09        | <b>2.59</b> | 2                                                                                                                           | 54.9  | 53.3         | 53.4         | 54.3         |
| 2 $\beta$                                                                                                                   | 2.30 | 2.40        | 2.46        | 2.78        | 3                                                                                                                           | 30.1  | 32.2         | 32.1         | 31.3         |
| 3 $\alpha$                                                                                                                  | 2.00 | 1.93        | 2.00        | 2.22        | 3a                                                                                                                          | 34.7  | 35.3         | 35.3         | 36.9         |
| 3 $\beta$                                                                                                                   | 1.62 | 1.79        | 1.78        | 1.64        | 4                                                                                                                           | 33.7  | 31.8         | 31.4         | 30.8         |
| 3a                                                                                                                          | 2.27 | 2.11        | 2.21        | 2.14        | 5                                                                                                                           | 68.6  | 67.5         | 67.8         | 67.9         |
| 4 $\alpha$                                                                                                                  | 1.62 | 1.54        | 1.66        | 1.88        | 5a                                                                                                                          | 81.4  | 78.2         | 79.1         | 79.1         |
| 4 $\beta$                                                                                                                   | 2.02 | 2.17        | 2.17        | 1.84        | 7                                                                                                                           | 164.0 | 163.1        | 162.8        | 162.6        |
| 5                                                                                                                           | 3.96 | 4.00        | 4.03        | 3.88        | 7a                                                                                                                          | 118.6 | 119.1        | 118.5        | 118.1        |
| 5a                                                                                                                          | 4.65 | 4.52        | 4.67        | 4.37        | 8                                                                                                                           | 109.7 | 110.8        | 110.7        | 109.6        |
| 8                                                                                                                           | 7.53 | 7.42        | 7.38        | 7.35        | 9                                                                                                                           | 147.2 | 146.0        | 146.2        | 146.2        |
| 11                                                                                                                          | 7.05 | <b>6.80</b> | 6.85        | 6.82        | 10                                                                                                                          | 152.6 | 152.0        | 152.1        | 151.9        |
| 11b                                                                                                                         | 3.34 | 3.13        | <b>3.09</b> | 3.15        | 11                                                                                                                          | 106.5 | 107.5        | 107.3        | 105.9        |
| 11c                                                                                                                         | 2.67 | 2.51        | 2.61        | 2.72        | 11a                                                                                                                         | 137.3 | <b>140.9</b> | <b>140.8</b> | <b>140.4</b> |
| 12 $\alpha$                                                                                                                 | 6.05 | 6.16        | 6.11        | 6.01        | 11b                                                                                                                         | 36.6  | 38.7         | 38.8         | 38.8         |
| 12 $\beta$                                                                                                                  | 6.05 | 6.11        | 6.11        | 5.77        | 11c                                                                                                                         | 66.6  | 67.8         | 67.7         | 65.8         |
| 13                                                                                                                          | 2.24 | 2.26        | 2.19        | 2.10        | 12                                                                                                                          | 102.0 | 101.1        | 102.3        | 101.3        |
| RMSD: <sup>c</sup>                                                                                                          |      |             |             |             | 13                                                                                                                          | 41.8  | 41.0         | 41.3         | 39.7         |
| MD: <sup>c</sup>                                                                                                            |      |             |             |             | RMSD: <sup>c</sup>                                                                                                          |       |              |              |              |
|                                                                                                                             |      |             |             |             | MD: <sup>c</sup>                                                                                                            |       |              |              |              |
|                                                                                                                             |      |             |             |             |                                                                                                                             |       |              |              |              |

<sup>a</sup>: Data for method 1 (current study – see Table 7 of the main text for details on the model chemistry)

<sup>b</sup>: Data for method 2 (current study – see Table 7 of the main text for details on the model chemistry)

<sup>c</sup>: Calculated GIAO chemical shifts from Ref [20] at the mPW1PW91/6-311+G(d,p) level using a CPCM/UAKS solvent model for chloroform on B3LYP/6-31+G(d,p) optimized geometries. Linear scaling factors were used to convert isotropic magnetic shielding values,  $\sigma_{\text{H}}$  and  $\sigma_{\text{C}}$ , to chemical shifts,  $\delta_{\text{H}}$  and  $\delta_{\text{C}}$ , using the formulas,  $\delta_{\text{H}} = (31.8486 - \sigma_{\text{H}})/1.08225$  and  $\delta_{\text{C}} = (186.060 - \sigma_{\text{C}})/1.04478$ .

<sup>d</sup>: Experimental  $^1\text{H}$  and  $^{13}\text{C}$  NMR data in  $\text{CDCl}_3$  referenced to TMS at an unspecified field strength from Ref [21].

<sup>e</sup>: RMSD = root mean square deviation, MD = maximum deviation (largest errors highlighted in blue).

**Table S12.** Comparison of DFT  $\delta_{\text{H}}$  and  $\delta_{\text{C}}$  predictions for **intricarene**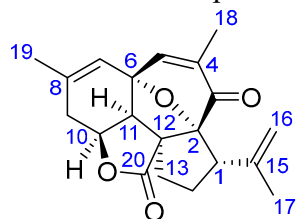

| Method: 1 <sup>a</sup> |                           |      |      |      | Method: 2 <sup>b</sup> |                           |       |       |       | Lit <sup>c</sup>   |                           |       |       |       |
|------------------------|---------------------------|------|------|------|------------------------|---------------------------|-------|-------|-------|--------------------|---------------------------|-------|-------|-------|
| Expt <sup>d</sup>      |                           |      |      |      | Expt <sup>d</sup>      |                           |       |       |       | Expt <sup>d</sup>  |                           |       |       |       |
| DFT                    |                           |      |      |      | DFT                    |                           |       |       |       | DFT                |                           |       |       |       |
| Atom                   | $\delta_{\text{H}}$ (ppm) |      |      |      | Atom                   | $\delta_{\text{C}}$ (ppm) |       |       |       | Atom               | $\delta_{\text{C}}$ (ppm) |       |       |       |
| 1                      | 3.38                      | 3.47 | 3.46 | 3.44 | 1                      | 46.4                      | 47.3  | 47.3  | 48.4  | 1                  | 46.4                      | 47.3  | 47.3  | 48.4  |
| 5                      | 6.27                      | 6.40 | 6.48 | 6.32 | 2                      | 102.8                     | 105.6 | 105.3 | 105.9 | 2                  | 102.8                     | 105.6 | 105.3 | 105.9 |
| 7                      | 6.41                      | 6.34 | 6.36 | 6.32 | 3                      | 193.0                     | 197.0 | 196.4 | 192.3 | 3                  | 193.0                     | 197.0 | 196.4 | 192.3 |
| 9a                     | 2.82                      | 2.79 | 2.79 | 2.77 | 4                      | 137.2                     | 138.9 | 138.8 | 138.3 | 4                  | 137.2                     | 138.9 | 138.8 | 138.3 |
| 9b                     | 2.41                      | 2.20 | 2.43 | 2.27 | 5                      | 147.3                     | 150.9 | 150.6 | 150.3 | 5                  | 147.3                     | 150.9 | 150.6 | 150.3 |
| 10                     | 4.77                      | 4.53 | 4.68 | 4.55 | 6                      | 84.6                      | 85.6  | 85.8  | 85.3  | 6                  | 84.6                      | 85.6  | 85.8  | 85.3  |
| 11                     | 2.54                      | 2.52 | 2.65 | 2.70 | 7                      | 128.1                     | 130.8 | 130.0 | 129.5 | 7                  | 128.1                     | 130.8 | 130.0 | 129.5 |
| 13a                    | 2.01                      | 2.10 | 2.07 | 2.02 | 8                      | 135.2                     | 139.2 | 139.0 | 140.1 | 8                  | 135.2                     | 139.2 | 139.0 | 140.1 |
| 13b                    | 1.92                      | 1.88 | 2.04 | 1.83 | 9                      | 35.7                      | 36.1  | 35.7  | 36.3  | 9                  | 35.7                      | 36.1  | 35.7  | 36.3  |
| 14a                    | 2.11                      | 2.13 | 2.09 | 2.10 | 10                     | 70.7                      | 70.4  | 71.8  | 69.8  | 10                 | 70.7                      | 70.4  | 71.8  | 69.8  |
| 14b                    | 1.91                      | 1.92 | 2.00 | 1.86 | 11                     | 58.0                      | 60.0  | 59.5  | 59.5  | 11                 | 58.0                      | 60.0  | 59.5  | 59.5  |
| 16a                    | 4.92                      | 4.94 | 4.84 | 4.94 | 12                     | 64.2                      | 66.8  | 66.4  | 66.3  | 12                 | 64.2                      | 66.8  | 66.4  | 66.3  |
| 16b                    | 4.86                      | 4.88 | 4.91 | 5.13 | 13                     | 29.3                      | 31.0  | 30.8  | 31.8  | 13                 | 29.3                      | 31.0  | 30.8  | 31.8  |
| 17                     | 1.75                      | 1.77 | 1.80 | 1.81 | 14                     | 28.5                      | 30.2  | 29.4  | 29.8  | 14                 | 28.5                      | 30.2  | 29.4  | 29.8  |
| 18                     | 1.76                      | 1.72 | 1.72 | 1.62 | 15                     | 141.8                     | 145.1 | 145.4 | 146.0 | 15                 | 141.8                     | 145.1 | 145.4 | 146.0 |
| 19                     | 1.84                      | 1.87 | 1.92 | 1.87 | 16                     | 113.3                     | 114.6 | 113.6 | 116.3 | 16                 | 113.3                     | 114.6 | 113.6 | 116.3 |
|                        |                           |      |      |      | 17                     | 23.1                      | 23.9  | 23.7  | 21.6  | 17                 | 23.1                      | 23.9  | 23.7  | 21.6  |
|                        |                           |      |      |      | 18                     | 14.4                      | 17.2  | 17.2  | 15.5  | 18                 | 14.4                      | 17.2  | 17.2  | 15.5  |
|                        |                           |      |      |      | 19                     | 23.0                      | 23.9  | 23.8  | 23.1  | 19                 | 23.0                      | 23.9  | 23.8  | 23.1  |
|                        |                           |      |      |      | 20                     | 177.9                     | 178.4 | 177.5 | 178.4 | 20                 | 177.9                     | 178.4 | 177.5 | 178.4 |
| RMSD: <sup>e</sup>     |                           |      |      |      | RMSD: <sup>e</sup>     |                           |       |       |       | RMSD: <sup>e</sup> |                           |       |       |       |
| MD: <sup>e</sup>       |                           |      |      |      | MD: <sup>e</sup>       |                           |       |       |       | MD: <sup>e</sup>   |                           |       |       |       |
|                        |                           |      |      |      |                        |                           |       |       |       |                    |                           |       |       |       |

<sup>a</sup>: Data for method 1 (current study – see Table 7 of the main text for details on the model chemistry)<sup>b</sup>: Data for method 2 (current study – see Table 7 of the main text for details on the model chemistry)<sup>c</sup>: Calculated chemical shifts from Ref [4]. NMR calculations (both  $\delta_{\text{H}}$  and  $\delta_{\text{C}}$ ) at the mPW1PW91/6-311+G(2d,p) level with CPCM/UAKS solvent model for chloroform on B3LYP/6-31+G(d,p) geometries. Linear scaling factors were used to convert isotropic magnetic shielding values,  $\sigma_{\text{H}}$  and  $\sigma_{\text{C}}$ , to chemical shifts,  $\delta_{\text{H}}$  and  $\delta_{\text{C}}$ , using the formulas,  $\delta_{\text{H}} = (31.8486 - \sigma_{\text{H}})/1.08225$  and  $\delta_{\text{C}} = (186.060 - \sigma_{\text{C}})/1.04478$ .<sup>d</sup>: Experimental  $^1\text{H}$  and  $^{13}\text{C}$  NMR were collected at 25°C in  $\text{CDCl}_3$  using a 500 MHz NMR spectrometer and referenced to TMS [22].<sup>e</sup>: RMSD = root mean square deviation, MD = maximum deviation (largest errors highlighted in blue).

**Table S13.** Comparison of DFT  $\delta_{\text{H}}$  and  $\delta_{\text{C}}$  predictions for **strychnine**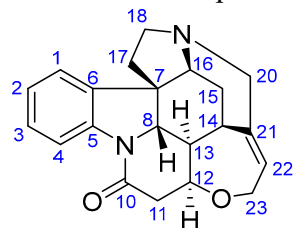

| Method: 1 <sup>a</sup> |                           |             |             |             | Method: 1 <sup>a</sup> |                           |              |              |              |
|------------------------|---------------------------|-------------|-------------|-------------|------------------------|---------------------------|--------------|--------------|--------------|
| Expt <sup>e</sup>      |                           |             |             |             | Expt <sup>e</sup>      |                           |              |              |              |
| DFT                    |                           |             |             |             | DFT                    |                           |              |              |              |
| Lit. 1 <sup>c</sup>    |                           |             |             |             | Lit. 1 <sup>c</sup>    |                           |              |              |              |
| DFT                    |                           |             |             |             | DFT                    |                           |              |              |              |
| Lit. 2 <sup>d</sup>    |                           |             |             |             | Lit. 2 <sup>d</sup>    |                           |              |              |              |
| DFT                    |                           |             |             |             | DFT                    |                           |              |              |              |
| Atom                   | $\delta_{\text{H}}$ (ppm) |             |             |             | Atom                   | $\delta_{\text{C}}$ (ppm) |              |              |              |
| 1                      | 7.16                      | 7.26        | 7.16        | 7.23        | 1                      | 122.8                     | 122.8        | 122.6        | 126.0        |
| 2                      | 7.08                      | 7.03        | 6.98        | 7.19        | 2                      | 124.4                     | 122.5        | 122.7        | 127.2        |
| 3                      | 7.24                      | 7.17        | 7.20        | 7.41        | 3                      | 128.8                     | 127.9        | 128.0        | 133.6        |
| 4                      | 8.08                      | 8.16        | 8.01        | <b>8.60</b> | 4                      | 116.3                     | 115.3        | 115.4        | 121.4        |
| 8                      | 3.85                      | 3.68        | 3.98        | 3.85        | 5                      | 142.2                     | 143.5        | 143.2        | 149.3        |
| 11a                    | 3.11                      | 2.92        | 3.01        | 3.01        | 6                      | 132.9                     | 134.0        | 134.3        | 138.0        |
| 11b                    | 2.66                      | 2.49        | 2.68        | 2.62        | 7                      | 52.3                      | 54.3         | 53.8         | 56.4         |
| 12                     | 4.27                      | 4.05        | 4.21        | 4.13        | 8                      | 60.1                      | 62.3         | 62.5         | 63.0         |
| 13                     | 1.26                      | 1.26        | 1.23        | 1.00        | 10                     | 170.3                     | 169.6        | 169.5        | 172.0        |
| 14                     | 3.13                      | <b>2.72</b> | 3.14        | 2.95        | 11                     | 42.8                      | 43.5         | 43.1         | 45.6         |
| 15a                    | 1.44                      | 1.28        | 1.41        | 1.34        | 12                     | 77.6                      | 77.0         | 77.1         | 81.6         |
| 15b                    | 2.35                      | 2.21        | <b>2.10</b> | 2.24        | 13                     | 48.2                      | 48.9         | 48.3         | 51.6         |
| 16                     | 3.96                      | 3.85        | 3.86        | 3.93        | 14                     | 31.7                      | 33.4         | 33.2         | 36.2         |
| 17a                    | 1.89                      | 1.93        | 1.84        | 1.87        | 15                     | 26.9                      | 28.6         | 28.4         | 30.0         |
| 17b                    | 1.87                      | 1.92        | 1.72        | 1.78        | 16                     | 60.1                      | 61.0         | 60.9         | 64.1         |
| 18a                    | 3.21                      | 3.07        | 3.01        | 3.09        | 17                     | 42.7                      | 44.4         | 44.3         | 46.1         |
| 18b                    | 2.87                      | 2.79        | 2.89        | 2.92        | 18                     | 50.3                      | 49.4         | 49.5         | 51.7         |
| 20a                    | 3.71                      | 3.64        | 3.65        | 3.75        | 20                     | 52.9                      | 51.7         | 51.8         | 54.8         |
| 20b                    | 2.74                      | 2.61        | 2.58        | 2.53        | 21                     | 140.0                     | <b>144.0</b> | <b>143.8</b> | <b>151.4</b> |
| 22                     | 5.92                      | 5.86        | 5.85        | 6.10        | 22                     | 127.9                     | 128.0        | 127.9        | 134.0        |
| 23a                    | 4.14                      | 4.03        | 4.16        | 4.10        | 23                     | 64.8                      | 63.5         | 63.9         | 67.3         |
| 23b                    | 4.05                      | 3.97        | 3.98        | 4.14        |                        |                           |              |              |              |
| RMSD: <sup>f</sup>     |                           |             |             |             | RMSD: <sup>f</sup>     |                           |              |              |              |
| MD: <sup>f</sup>       |                           |             |             |             | MD: <sup>f</sup>       |                           |              |              |              |

<sup>a</sup>: Data for method 1 (current study – see Table 7 of the main text for details on the model chemistry)

<sup>b</sup>: Data for method 2 (current study – see Table 7 of the main text for details on the model chemistry)

<sup>c</sup>: Data for literature method 1 reported by Ref [23]. The best  $\delta_{\text{H}}$  and  $\delta_{\text{C}}$  methods were B3LYP/cc-pVTZ and PBE0/cc-pVTZ, respectively, both with PCM solvation. Geometries were optimized at B3LYP/6-31G(d,p). Isotropic shielding values were converted to chemical shifts by subtracting from the calculated shielding values for TMS.

<sup>d</sup>: Data for literature method 2 reported by Semenov and Krivdin [24] with PCM solvation model. Geometry optimized at MP2/aug-cc-pVTZ, including solvent effects for chloroform from PCM. Calculated isotropic shielding values were converted to chemical shifts using the calculated value for TMS and then linearly scaled according to  $\delta_{\text{recalc}} = (\delta_{\text{calc}} - b) / a$ , where a and b were obtained via regression analysis.

<sup>e</sup>: Experimental data from Ref [25] performed on a 500 MHz NMR in CDCl<sub>3</sub>.

<sup>f</sup>: RMSD = root mean square deviation, MD = maximum deviation (largest errors highlighted in blue).

**Table S14.** Comparison of DFT  $\delta_H$  and  $\delta_C$  predictions for **holstiine**

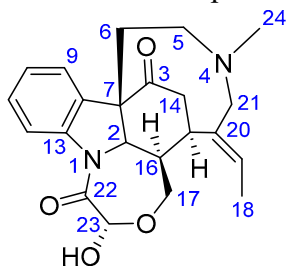

| <div>Method:</div> <div>Expt<sup>d</sup></div> <div>1<sup>a</sup></div> <div>2<sup>b</sup></div> <div>Lit<sup>c</sup></div> <div>DFT</div> <div>DFT</div> <div>DFT</div> |      |             |             |             | <div>Method:</div> <div>Expt<sup>d</sup></div> <div>1<sup>a</sup></div> <div>2<sup>b</sup></div> <div>Lit<sup>c</sup></div> <div>DFT</div> <div>DFT</div> <div>DFT</div> |       |              |              |             |
|--------------------------------------------------------------------------------------------------------------------------------------------------------------------------|------|-------------|-------------|-------------|--------------------------------------------------------------------------------------------------------------------------------------------------------------------------|-------|--------------|--------------|-------------|
| Atom                                                                                                                                                                     |      |             |             |             | Atom                                                                                                                                                                     |       |              |              |             |
| $\delta_H$ (ppm)                                                                                                                                                         |      |             |             |             | $\delta_C$ (ppm)                                                                                                                                                         |       |              |              |             |
| 2                                                                                                                                                                        | 4.84 | 4.58        | 4.90        | <b>5.31</b> | 2                                                                                                                                                                        | 67.2  | 68.6         | 69.0         | 68.5        |
| 5a                                                                                                                                                                       | 2.80 | 2.56        | <b>2.57</b> | 2.50        | 3                                                                                                                                                                        | 191.0 | <b>198.7</b> | <b>196.1</b> | 192.0       |
| 5b                                                                                                                                                                       | 2.66 | 2.55        | 2.64        | 2.72        | 5                                                                                                                                                                        | 53.5  | 53.2         | 52.4         | 52.9        |
| 6a                                                                                                                                                                       | 3.10 | 3.13        | 3.11        | 3.19        | 6                                                                                                                                                                        | 45.8  | 47.1         | 47.1         | 47.1        |
| 6b                                                                                                                                                                       | 1.95 | 1.87        | 1.93        | 1.83        | 7                                                                                                                                                                        | 55.8  | 59.2         | 58.8         | 57.8        |
| 9                                                                                                                                                                        | 7.52 | 7.55        | 7.48        | 7.45        | 8                                                                                                                                                                        | 132.7 | 134.0        | 134.3        | 134.4       |
| 10                                                                                                                                                                       | 7.14 | 6.99        | 7.07        | 7.09        | 9                                                                                                                                                                        | 124.9 | 124.8        | 124.8        | 124.8       |
| 11                                                                                                                                                                       | 7.31 | 7.15        | 7.22        | 7.23        | 10                                                                                                                                                                       | 125.4 | 124.0        | 124.1        | 124.6       |
| 12                                                                                                                                                                       | 8.22 | 8.39        | 8.16        | 8.19        | 11                                                                                                                                                                       | 128.8 | 128.4        | 128.4        | 128.0       |
| 14a                                                                                                                                                                      | 2.49 | 2.53        | 2.56        | 2.41        | 12                                                                                                                                                                       | 116.9 | 116.5        | 116.4        | 116.8       |
| 14b                                                                                                                                                                      | 2.27 | 2.30        | 2.38        | 2.25        | 13                                                                                                                                                                       | 139.9 | 140.9        | 140.8        | 140.1       |
| 15                                                                                                                                                                       | 3.21 | 3.10        | 3.16        | 3.09        | 14                                                                                                                                                                       | 43.5  | 45.7         | 44.9         | 45.0        |
| 16                                                                                                                                                                       | 2.33 | 2.28        | 2.32        | 2.45        | 15                                                                                                                                                                       | 34.1  | 35.8         | 35.4         | 37.5        |
| 17a                                                                                                                                                                      | 4.15 | 3.88        | 3.93        | 4.06        | 16                                                                                                                                                                       | 42.4  | 43.5         | 42.5         | 43.8        |
| 17b                                                                                                                                                                      | 3.85 | 3.60        | 3.83        | 3.41        | 17                                                                                                                                                                       | 74.3  | 72.1         | 72.4         | <b>63.0</b> |
| 18                                                                                                                                                                       | 1.61 | 1.68        | 1.78        | 1.72        | 18                                                                                                                                                                       | 13.0  | 14.7         | 14.6         | 14.6        |
| 19                                                                                                                                                                       | 5.51 | 5.48        | 5.40        | 5.75        | 19                                                                                                                                                                       | 125.8 | 129.3        | 128.9        | 128.3       |
| 21a                                                                                                                                                                      | 3.56 | 3.37        | 3.46        | 3.33        | 20                                                                                                                                                                       | 135.6 | 138.5        | 138.0        | 139.3       |
| 21b                                                                                                                                                                      | 3.42 | 3.23        | 3.52        | 3.85        | 21                                                                                                                                                                       | 69.4  | 68.7         | 68.2         | 70.2        |
| 23                                                                                                                                                                       | 5.34 | <b>5.04</b> | 5.33        | 5.41        | 22                                                                                                                                                                       | 167.9 | 170.8        | 170.0        | 165.7       |
| 24                                                                                                                                                                       | 1.91 | 1.91        | 2.05        | 1.92        | 23                                                                                                                                                                       | 92.8  | 92.9         | 93.2         | 94.1        |
| RMSD: <sup>c</sup>                                                                                                                                                       |      |             |             |             | 24                                                                                                                                                                       | 40.0  | 38.5         | 38.7         | 38.0        |
| MD: <sup>c</sup>                                                                                                                                                         |      |             |             |             | RMSD: <sup>c</sup>                                                                                                                                                       |       |              |              |             |
|                                                                                                                                                                          |      |             |             |             | 2.4                                                                                                                                                                      |       |              |              |             |
|                                                                                                                                                                          |      |             |             |             | MD: <sup>c</sup>                                                                                                                                                         |       |              |              |             |
|                                                                                                                                                                          |      |             |             |             | 7.7                                                                                                                                                                      |       |              |              |             |

<sup>a</sup>: Data for method 1 (current study – see Table 7 of the main text for details on the model chemistry)

<sup>b</sup>: Data for method 2 (current study – see Table 7 of the main text for details on the model chemistry)

<sup>c</sup>: Calculated chemical shifts at the PBE0/pcSseg-2//pcseg-2 level using linear scaling factors [26].

<sup>d</sup>: Experimental data from a 30 mg sample dissolved in 0.5 mL CDCl<sub>3</sub> acquired on a 300 MHz NMR spectrometer [27].

<sup>e</sup>: RMSD = root mean square deviation, MD = maximum deviation (largest errors highlighted in blue).



**Table S15.** Comparison of DFT  $\delta_H$  and  $\delta_C$  predictions for **colchicine**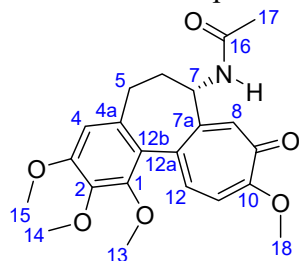

| Method: 1 <sup>a</sup> 2 <sup>b</sup> Lit <sup>c</sup> Lit <sup>d</sup> |      |             |             |             |             | Method: 1 <sup>a</sup> 2 <sup>b</sup> Lit <sup>c</sup> Lit <sup>d</sup> |       |              |              |              |              |
|-------------------------------------------------------------------------|------|-------------|-------------|-------------|-------------|-------------------------------------------------------------------------|-------|--------------|--------------|--------------|--------------|
| Expt <sup>e</sup> DFT DFT DFT DFT                                       |      |             |             |             |             | Expt <sup>e</sup> DFT DFT DFT DFT                                       |       |              |              |              |              |
| Atom $\delta_H$ (ppm)                                                   |      |             |             |             |             | Atom $\delta_C$ (ppm)                                                   |       |              |              |              |              |
| 4                                                                       | 6.52 | 6.49        | 6.56        | 6.41        | 6.37        | 1                                                                       | 151.2 | 153.5        | 153.7        | 150.4        | 151.1        |
| 5 $\alpha$                                                              | 2.52 | 2.48        | 2.57        | 2.44        | 2.39        | 2                                                                       | 141.6 | 142.9        | 143.5        | 140.5        | 141.3        |
| 5 $\beta$                                                               | 2.41 | 2.34        | 2.43        | 2.38        | 2.37        | 3                                                                       | 153.6 | 154.2        | 154.4        | 152.7        | 153.4        |
| 6 $\alpha$                                                              | 2.22 | 2.13        | 2.24        | 2.13        | 2.12        | 4                                                                       | 107.3 | 109.0        | 110.1        | 104.4        | 103.9        |
| 6 $\beta$                                                               | 1.76 | 1.81        | 1.89        | 1.69        | 1.65        | 4a                                                                      | 134.2 | 136.8        | 136.3        | 135.4        | 136.1        |
| 7                                                                       | 4.63 | 4.58        | 4.46        | 4.48        | 4.48        | 5                                                                       | 29.9  | 30.9         | 30.4         | 31.0         | 31.6         |
| 8                                                                       | 7.34 | <b>7.13</b> | 7.15        | 7.19        | 7.17        | 6                                                                       | 36.5  | 38.4         | 37.7         | 38.9         | 40.1         |
| 11                                                                      | 6.79 | 6.68        | 6.83        | 6.56        | <b>6.51</b> | 7                                                                       | 52.6  | 52.5         | 54.4         | 52.1         | 52.8         |
| 12                                                                      | 7.27 | 7.08        | 7.13        | 7.06        | 7.04        | 7a                                                                      | 152.3 | 153.6        | 153.1        | 150.6        | 151.1        |
| 13                                                                      | 3.63 | 3.58        | 3.51        | 3.56        | 3.60        | 8                                                                       | 130.5 | 133.6        | <b>134.5</b> | 130.9        | 130.4        |
| 14                                                                      | 3.93 | 3.85        | 3.84        | <b>3.68</b> | 3.72        | 9                                                                       | 179.5 | 179.0        | 179.9        | <b>174.5</b> | <b>174.4</b> |
| 15                                                                      | 3.89 | 3.87        | 3.86        | 3.70        | 3.75        | 10                                                                      | 163.8 | 166.7        | 167.6        | 164.2        | 164.8        |
| 17                                                                      | 1.99 | 1.86        | <b>1.79</b> | 1.78        | 1.76        | 11                                                                      | 112.8 | 112.8        | 115.2        | 109.0        | 108.6        |
| 18                                                                      | 3.98 | 4.01        | 3.99        | 3.75        | 3.78        | 12                                                                      | 135.6 | <b>139.4</b> | 138.7        | 136.6        | 136.4        |
|                                                                         |      |             |             |             |             | 12a                                                                     | 136.9 | 136.5        | 136.5        | 135.6        | 136.4        |
|                                                                         |      |             |             |             |             | 12b                                                                     | 125.6 | 129.2        | 129.6        | 126.4        | 127.1        |
|                                                                         |      |             |             |             |             | 13                                                                      | 61.6  | 59.1         | 59.5         | 58.5         | 58.6         |
|                                                                         |      |             |             |             |             | 14                                                                      | 61.4  | 58.3         | 59.3         | 58.0         | 58.2         |
|                                                                         |      |             |             |             |             | 15                                                                      | 56.1  | 54.4         | 55.8         | 52.9         | 53.1         |
|                                                                         |      |             |             |             |             | 16                                                                      | 170.1 | 167.0        | 166.9        | 166.4        | 166.7        |
|                                                                         |      |             |             |             |             | 17                                                                      | 22.8  | 23.4         | 23.3         | 21.9         | 21.4         |
|                                                                         |      |             |             |             |             | 18                                                                      | 56.4  | 55.0         | 56.1         | 53.3         | 53.5         |
|                                                                         |      |             |             |             |             | RMSD: <sup>f</sup> 2.1 2.2 2.3 2.4                                      |       |              |              |              |              |
|                                                                         |      |             |             |             |             | MD: <sup>f</sup> 3.8 4.0 5.0 5.1                                        |       |              |              |              |              |
| RMSD: <sup>f</sup> 0.10 0.11 0.16 0.17                                  |      |             |             |             |             | RMSD: <sup>f</sup> 2.1 2.2 2.3 2.4                                      |       |              |              |              |              |
| MD: <sup>f</sup> 0.21 0.20 0.25 0.28                                    |      |             |             |             |             | MD: <sup>f</sup> 3.8 4.0 5.0 5.1                                        |       |              |              |              |              |

<sup>a</sup>: Data for method 1 (current study – see Table 7 of the main text for details on the model chemistry)

<sup>b</sup>: Data for method 2 (current study – see Table 7 of the main text for details on the model chemistry)

<sup>c</sup>: Calculated GIAO chemical shifts from Ref [28] at the mPW1PW91/6-311+G(2d,p) level using optimized geometries at the B3LYP/6-311+G(2d,p) level. A PCM solvent model for chloroform was used for both NMR and geometry optimizations. Gibbs free energies were calculated at the B3LYP/6-311+G(d,p) level for Boltzmann populations. Linear scaling factors were used to convert isotropic magnetic shielding values,  $\sigma_H$  and  $\sigma_C$ , to chemical shifts,  $\delta_H$  and  $\delta_C$ , using the formulas,  $\delta_H = (31.873 - \sigma_H)/1.072$  and  $\delta_C = (186.357 - \sigma_C)/1.042$ .

<sup>d</sup>: Calculated GIAO chemical shifts from Ref [28] at the B3LYP/6-311+G(2d,p) level using optimized geometries at the B3LYP/6-311+G(2d,p) level. A PCM solvent model for chloroform was used for both NMR and geometry optimizations. Gibbs free energies were calculated at the B3LYP/6-311+G(d,p) level for Boltzmann populations. Linear scaling factors were used to convert isotropic magnetic shielding values,  $\sigma_H$  and  $\sigma_C$ , to chemical shifts,  $\delta_H$  and  $\delta_C$ , using the formulas,  $\delta_H = (31.934 - \sigma_H)/1.056$  and  $\delta_C = (181.717 - \sigma_C)/1.043$ .

<sup>e</sup>: Experimental  $^1H$  and  $^{13}C$  NMR data for 0.46 mM and 46 mM samples, respectively, in  $CDCl_3$  [28].

<sup>f</sup>: RMSD = root mean square deviation, MD = maximum deviation (largest errors highlighted in blue).

**Table S16.** Comparison of DFT  $\delta_{\text{H}}$  and  $\delta_{\text{C}}$  predictions for **hexacyclinol**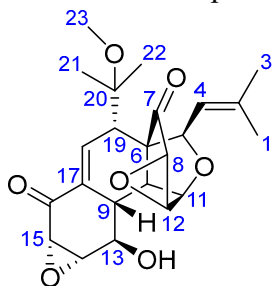

| Atom                      | Method:<br>Expt <sup>f</sup> | 1 <sup>a</sup><br>DFT | 2 <sup>b</sup><br>DFT | Lit <sup>c</sup><br>DFT | Atom                      | Method:<br>Expt <sup>f</sup> | 1 <sup>a</sup><br>DFT | 2 <sup>b</sup><br>DFT | Lit <sup>d</sup><br>DFT | Lit <sup>c</sup><br>DFT | Lit <sup>e</sup><br>ML |
|---------------------------|------------------------------|-----------------------|-----------------------|-------------------------|---------------------------|------------------------------|-----------------------|-----------------------|-------------------------|-------------------------|------------------------|
| $\delta_{\text{H}}$ (ppm) |                              |                       |                       |                         | $\delta_{\text{C}}$ (ppm) |                              |                       |                       |                         |                         |                        |
| 1                         | 1.79                         | 1.82                  | 1.86                  | 1.91                    | 1                         | 18.6                         | 19.3                  | 18.9                  | 15.4                    | 19.7                    | 22.8                   |
| 3                         | 1.73                         | 1.74                  | 1.77                  | 1.70                    | 2                         | 142.2                        | 142.9                 | 143.1                 | 138.7                   | 143.6                   | 135.9                  |
| 4                         | 4.85                         | 4.92                  | 4.87                  | 5.22                    | 3                         | 26.1                         | 27.0                  | 27.0                  | 25.7                    | 29.1                    | 22.8                   |
| 5                         | 5.49                         | 5.43                  | 5.68                  | 5.54                    | 4                         | 120.7                        | 123.3                 | 122.7                 | 120.4                   | 127.1                   | 120.6                  |
| 8                         | 3.25                         | 3.15                  | 3.24                  | 2.89                    | 5                         | 75.8                         | 77.0                  | 77.2                  | 77.6                    | 82.8                    | 78.1                   |
| 9                         | 3.63                         | 3.35                  | 3.65                  | 3.39                    | 6                         | 60.5                         | 63.7                  | 62.7                  | 60.5                    | 65.8                    | 57.0                   |
| 10                        | 2.76                         | 2.63                  | 2.92                  | 2.50                    | 7                         | 202.9                        | <b>209.9</b>          | <b>208.8</b>          | 206.0                   | 210.1                   | 199.3                  |
| 11                        | 5.01                         | 4.94                  | 4.91                  | 5.06                    | 8                         | 53.1                         | 54.1                  | 54.1                  | 54.4                    | 56.5                    | 53.7                   |
| 12                        | 3.66                         | 3.59                  | 3.68                  | 3.98                    | 9                         | 40.4                         | 43.0                  | 42.4                  | 37.6                    | 43.5                    | 39.2                   |
| 13                        | 3.84                         | 3.77                  | 3.93                  | 3.72                    | 10                        | 47.8                         | 48.8                  | 48.7                  | 47.6                    | 51.5                    | 46.3                   |
| 14                        | 3.53                         | 3.56                  | 3.63                  | 3.15                    | 11                        | 71.5                         | 71.6                  | 71.4                  | 71.8                    | 76.8                    | 76.9                   |
| 15                        | 3.32                         | 3.18                  | 3.27                  | 3.01                    | 12                        | 54.5                         | 56.0                  | 56.4                  | <b>59.7</b>             | 58.4                    | 52.8                   |
| 18                        | 6.76                         | 7.04                  | 7.00                  | <b>7.38</b>             | 13                        | 72.7                         | 71.9                  | 72.2                  | 76.4                    | 78.7                    | 74.0                   |
| 19                        | 3.61                         | <b>3.99</b>           | <b>3.91</b>           | 4.10                    | 14                        | 61.0                         | 61.5                  | 61.7                  | 63.6                    | 64.3                    | 58.3                   |
| 21                        | 1.28                         | 1.29                  | 1.22                  | 1.25                    | 15                        | 53.2                         | 53.9                  | 54.5                  | 52.8                    | 55.2                    | <b>60.8</b>            |
| 22                        | 1.17                         | 1.13                  | 1.31                  | 1.04                    | 16                        | 192.8                        | 195.7                 | 195.9                 | 188.7                   | 195.4                   | 191.0                  |
| 23                        | 3.04                         | 3.06                  | 3.01                  | 3.04                    | 17                        | 132.5                        | 133.6                 | 133.4                 | 131.4                   | 137.2                   | 134.9                  |
|                           |                              |                       |                       |                         | 18                        | 139.6                        | 145.4                 | 144.6                 | 141.2                   | <b>148.6</b>            | 144.5                  |
|                           |                              |                       |                       |                         | 19                        | 40.9                         | 42.2                  | 41.5                  | 39.5                    | 46.5                    | 48.3                   |
|                           |                              |                       |                       |                         | 20                        | 77.3                         | 77.6                  | 77.8                  | 79.7                    | 83.1                    | 79.4                   |
|                           |                              |                       |                       |                         | 21                        | 26.6                         | 27.6                  | 27.4                  | 25.6                    | 24.4                    | 24.9                   |
|                           |                              |                       |                       |                         | 22                        | 24.7                         | 26.0                  | 26.1                  | 23.9                    | 25.6                    | 24.9                   |
|                           |                              |                       |                       |                         | 23                        | 49.1                         | 48.5                  | 48.6                  | 48.0                    | 49.8                    | 50.0                   |
|                           |                              |                       |                       |                         |                           |                              |                       |                       |                         |                         |                        |
| RMSD: <sup>g</sup>        |                              | 0.15                  | 0.13                  | 0.29                    | RMSD: <sup>g</sup>        |                              | 2.4                   | 2.1                   | 2.3                     | 4.6                     | 3.6                    |
| MD: <sup>g</sup>          |                              | 0.38                  | 0.30                  | 0.62                    | MD: <sup>g</sup>          |                              | 7.0                   | 5.9                   | 5.2                     | 9.0                     | 7.6                    |

<sup>a</sup>: Data for method 1 (current study – see Table 7 of the main text for details on the model chemistry)<sup>b</sup>: Data for method 2 (current study – see Table 7 of the main text for details on the model chemistry)<sup>c</sup>: Calculated chemical shifts from Saielli and Bagno [29] at the B97-2/cc-pVTZ level using B3LYP/6-31G(d,p) optimized geometries. Isotropic shielding values were converted to chemical shifts by subtracting from the calculated value for TMS.<sup>d</sup>: Calculated GIAO  $^{13}\text{C}$  chemical shifts from Ref [30] at the mPW1PW91/6-31G(d,p) level using HF/3-21G geometries. Isotropic shielding values were converted to chemical shifts,  $\delta_{\text{C}}$ , by subtracting from the calculated value for TMS, and then  $\delta_{\text{C}}$  were scaled by linear least squares regression analysis. Only two conformers were evaluated without Boltzmann weighting. The above data is for the best matching conformer.<sup>e</sup>: Calculated chemical shifts using machine learning / DFT approach, CASCADE reported in Ref [6].<sup>f</sup>: Experimental  $^1\text{H}$  and  $^{13}\text{C}$  data from Williams, *et. al.* for a 1.2 mg sample in 0.12 mL of  $\text{CDCl}_3$  acquired on a 900 MHz NMR spectrometer [31].<sup>g</sup>: RMSD = root mean square deviation, MD = maximum deviation (largest errors highlighted in blue).

**Table S17.** Comparison of DFT  $\delta_{\text{H}}$  and  $\delta_{\text{C}}$  predictions for **homodimericin A**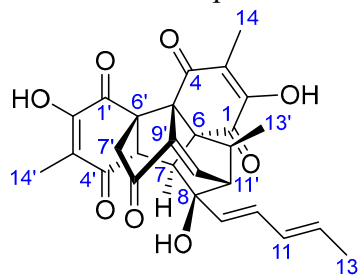

| Method: 1 <sup>a</sup> 2 <sup>b</sup> |                           |             |             | Method: 1 <sup>a</sup> 2 <sup>b</sup> |                           |              |              |
|---------------------------------------|---------------------------|-------------|-------------|---------------------------------------|---------------------------|--------------|--------------|
| Expt <sup>d</sup> DFT DFT             |                           |             |             | Expt <sup>d</sup> DFT DFT             |                           |              |              |
| Atom                                  | $\delta_{\text{H}}$ (ppm) |             |             | Atom                                  | $\delta_{\text{C}}$ (ppm) |              |              |
| 7                                     | 3.26                      | <b>3.05</b> | 3.21        | 1                                     | 195.2                     | 202.6        | 201.4        |
| 9                                     | 5.90                      | 5.91        | 5.93        | 2                                     | 154.0                     | 155.3        | 155.0        |
| 10                                    | 6.51                      | <b>6.72</b> | <b>6.70</b> | 3                                     | 127.6                     | 127.6        | 127.7        |
| 11                                    | 6.07                      | 6.13        | 6.11        | 4                                     | 194.3                     | 197.8        | 197.5        |
| 12                                    | 5.87                      | 5.96        | 5.93        | 5                                     | 62.8                      | 67.7         | 67.4         |
| 13                                    | 1.80                      | 1.88        | 1.93        | 6                                     | 64.7                      | 66.8         | 66.3         |
| 14                                    | 2.08                      | 2.18        | 2.23        | 7                                     | 59.7                      | 64.2         | 62.6         |
| 5'                                    | 3.80                      | 3.83        | 3.93        | 8                                     | 85.4                      | 86.3         | 86.7         |
| 7'a                                   | 2.84                      | 2.70        | 2.88        | 9                                     | 135.1                     | 137.2        | 137.0        |
| 7'b                                   | 2.47                      | 2.38        | 2.58        | 10                                    | 132.2                     | 132.1        | 132.2        |
| 10'                                   | 6.74                      | 6.89        | 6.75        | 11                                    | 130.3                     | 129.4        | 129.5        |
| 11'                                   | 2.71                      | 2.82        | 2.77        | 12                                    | 132.8                     | 135.9        | 135.9        |
| 12'                                   | 2.27                      | 2.28        | 2.35        | 13                                    | 18.3                      | 19.7         | 19.6         |
| 13'                                   | 0.84                      | 0.81        | 0.86        | 14                                    | 9.4                       | 12.7         | 12.5         |
| 14'                                   | 1.94                      | 1.97        | 2.07        | 1'                                    | 193.4                     | <b>201.1</b> | <b>199.9</b> |
|                                       |                           |             |             | 2'                                    | 155.0                     | 157.3        | 156.3        |
|                                       |                           |             |             | 3'                                    | 126.0                     | 122.6        | 123.8        |
|                                       |                           |             |             | 4'                                    | 196.4                     | 200.3        | 200.0        |
|                                       |                           |             |             | 5'                                    | 55.7                      | 56.8         | 56.8         |
|                                       |                           |             |             | 6'                                    | 64.3                      | 65.8         | 65.3         |
|                                       |                           |             |             | 7'                                    | 47.9                      | 50.8         | 50.1         |
|                                       |                           |             |             | 8'                                    | 197.3                     | 198.5        | 198.7        |
|                                       |                           |             |             | 9'                                    | 139.2                     | 141.1        | 140.6        |
|                                       |                           |             |             | 10'                                   | 136.1                     | 142.0        | 141.4        |
|                                       |                           |             |             | 11'                                   | 52.5                      | 56.1         | 54.8         |
|                                       |                           |             |             | 12'                                   | 41.1                      | 45.2         | 44.1         |
|                                       |                           |             |             | 13'                                   | 12.3                      | 13.5         | 13.4         |
|                                       |                           |             |             | 14'                                   | 9.4                       | 10.1         | 11.4         |
| RMSD: <sup>d</sup>                    |                           |             |             | RMSD: <sup>d</sup>                    |                           |              |              |
| MD: <sup>d</sup>                      |                           |             |             | MD: <sup>d</sup>                      |                           |              |              |
| 0.10 0.10                             |                           |             |             | 3.4 2.9                               |                           |              |              |
| 0.21 0.19                             |                           |             |             | 7.7 6.5                               |                           |              |              |

<sup>a</sup>: Data for method 1 (current study – see Table 7 of the main text for details on the model chemistry)

<sup>b</sup>: Data for method 2 (current study – see Table 7 of the main text for details on the model chemistry)

<sup>c</sup>: <sup>1</sup>H and <sup>13</sup>C NMR data were acquired in this study for a 2 mg synthetic sample dissolved in 0.5 mL CDCl<sub>3</sub>. Spectra were recorded at 25°C on a 600 MHz NMR spectrometer and referenced to TMS.

<sup>d</sup>: RMSD = root mean square deviation, MD = maximum deviation (largest errors highlighted in blue).

**Table S18.** Comparison of DFT  $\delta_{\text{H}}$  predictions for **strychnobaillonine**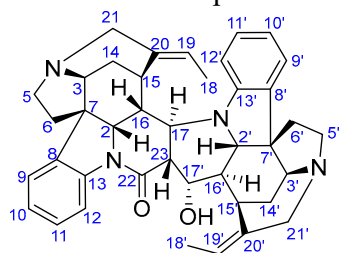

| Method: 1 <sup>a</sup> |                           |             |             |             | Method: 2 <sup>b</sup> |                           |      |      |      |
|------------------------|---------------------------|-------------|-------------|-------------|------------------------|---------------------------|------|------|------|
| Expt <sup>d</sup> DFT  |                           |             |             |             | Expt <sup>d</sup> DFT  |                           |      |      |      |
| Atom                   | $\delta_{\text{H}}$ (ppm) |             |             |             | Atom                   | $\delta_{\text{H}}$ (ppm) |      |      |      |
| 2                      | 4.45                      | 4.32        | 4.30        | 4.33        | 2'                     | 3.06                      | 3.31 | 3.38 | 3.47 |
| 3                      | 3.24                      | 3.18        | 3.03        | 3.32        | 3'                     | 3.51                      | 3.29 | 3.44 | 3.40 |
| 5a                     | 3.18                      | 3.15        | 3.11        | 3.39        | 5a'                    | 3.18                      | 3.02 | 3.01 | 3.03 |
| 5b                     | 3.03                      | 2.91        | 2.95        | 3.01        | 5b'                    | 2.71                      | 2.63 | 2.71 | 2.65 |
| 6a                     | 2.46                      | 2.11        | 2.32        | 2.17        | 6a'                    | 2.30                      | 1.49 | 1.72 | 1.62 |
| 6b                     | 2.14                      | 2.09        | 2.27        | 2.04        | 6b'                    | (mult.)                   | 2.25 | 2.40 | 2.43 |
| 9                      | 7.26                      | 7.20        | 7.22        | 7.40        | 9'                     | 7.09                      | 6.97 | 7.00 | 7.13 |
| 10                     | 7.18                      | 7.09        | 7.11        | 7.19        | 10'                    | 6.85                      | 6.69 | 6.71 | 6.83 |
| 11                     | 7.29                      | 7.21        | 7.23        | 7.29        | 11'                    | 7.17                      | 6.97 | 7.00 | 7.16 |
| 12                     | 8.23                      | 8.25        | 8.09        | 8.28        | 12'                    | 6.52                      | 6.61 | 6.74 | 6.59 |
| 14a                    | 1.72                      | 1.65        | 1.76        | 1.81        | 14a'                   | 2.04                      | 1.88 | 1.93 | 1.83 |
| 14b                    | 1.73                      | 2.03        | 1.87        | 2.05        | 14b'                   | 1.62                      | 1.45 | 1.60 | 1.78 |
| 15                     | 2.74                      | 2.99        | <b>3.08</b> | 3.30        | 15'                    | 3.03                      | 2.87 | 2.95 | 3.04 |
| 16                     | 2.57                      | 2.56        | 2.50        | 2.85        | 16'                    | 1.61                      | 1.52 | 1.77 | 1.67 |
| 17                     | 3.86                      | 3.72        | 3.70        | 3.86        | 17'                    | 4.62                      | 4.32 | 4.34 | 4.15 |
| 18                     | 1.78                      | 1.64        | 1.78        | 1.68        | 18'                    | 1.72                      | 1.75 | 1.83 | 1.73 |
| 19                     | 5.43                      | 5.36        | 5.44        | 5.48        | 19'                    | 5.62                      | 5.44 | 5.41 | 5.69 |
| 21a                    | 3.62                      | 3.49        | 3.31        | 3.73        | 21a'                   | 3.59                      | 3.55 | 3.46 | 3.45 |
| 21b                    | 3.36                      | <b>2.90</b> | 3.25        | <b>2.74</b> | 21b'                   | 2.91                      | 2.83 | 3.06 | 3.12 |
| 23                     | 2.88                      | 2.55        | 2.72        | 2.55        |                        |                           |      |      |      |
| RMSD <sup>c</sup> :    |                           |             |             |             |                        |                           | 0.19 | 0.16 | 0.22 |
| MD <sup>c</sup> :      |                           |             |             |             |                        |                           | 0.46 | 0.34 | 0.62 |

<sup>a</sup>: Data for method 1 (current study – see Table 7 of the main text for details on the model chemistry)

<sup>b</sup>: Data for method 2 (current study – see Table 7 of the main text for details on the model chemistry)

<sup>c</sup>: Data from Semenov and Krivdin [32], PCM-PBE0/pcSseg-2//pcseg-2. Geometries at PCM-B3LYP/aug-cc-pVQZ//cc-pVQZ.

<sup>d</sup>: Experimental data from A.T. Tchinda, *et al.* [33].

<sup>e</sup>: RMSD = Root mean square deviation, MD = maximum deviation (largest errors highlighted in blue).

**Table S19.** Comparison of DFT  $\delta_c$  predictions for **strychnobailonine**

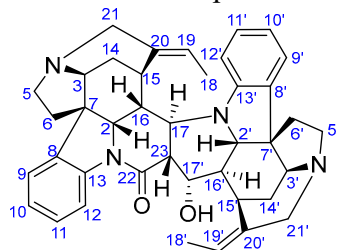

| Method: 1 <sup>a</sup> |                  |       |       |       | Method: 2 <sup>b</sup> |                  |       |       |       |
|------------------------|------------------|-------|-------|-------|------------------------|------------------|-------|-------|-------|
| Expt <sup>d</sup>      |                  |       |       |       | Expt <sup>d</sup>      |                  |       |       |       |
| DFT                    |                  |       |       |       | DFT                    |                  |       |       |       |
| Lit. <sup>c</sup>      |                  |       |       |       | Lit. <sup>c</sup>      |                  |       |       |       |
| DFT                    |                  |       |       |       | DFT                    |                  |       |       |       |
| Atom                   | $\delta_c$ (ppm) |       |       |       | Atom                   | $\delta_c$ (ppm) |       |       |       |
| 2                      | 63.7             | 65.5  | 67.3  | 61.2  | 23                     | 47.8             | 47.7  | 48.1  | 44.7  |
| 3                      | 66.3             | 66.8  | 68.5  | 66.7  | 2'                     | 69.4             | 67.4  | 70.3  | 67.3  |
| 5                      | 54.1             | 55.3  | 55.3  | 56.6  | 3'                     | 61.7             | 61.1  | 62.2  | 61.5  |
| 6                      | 36.5             | 44.4  | 40.3  | 43.2  | 5'                     | 53.7             | 52.6  | 53.6  | 51.6  |
| 7                      | 52.8             | 56.2  | 56.1  | 54.8  | 6'                     | 41.2             | 41.6  | 43.4  | 40.4  |
| 8                      | 137.4            | 140.9 | 141.0 | 142.1 | 7'                     | 51.8             | 54.7  | 54.1  | 54.1  |
| 9                      | 122.3            | 122.8 | 122.5 | 121.4 | 8'                     | 134.3            | 133.8 | 135.5 | 133.9 |
| 10                     | 125.3            | 124.1 | 124.2 | 123.8 | 9'                     | 122.2            | 123.4 | 123.0 | 121.6 |
| 11                     | 128.0            | 127.4 | 127.8 | 126.0 | 10'                    | 119.8            | 117.7 | 118.0 | 116.3 |
| 12                     | 117.9            | 115.7 | 115.2 | 115.2 | 11'                    | 128.2            | 127.6 | 127.8 | 126.1 |
| 13                     | 141.4            | 141.1 | 140.7 | 139.1 | 12'                    | 108.3            | 107.1 | 108.3 | 104.8 |
| 14                     | 23.8             | 24.0  | 25.1  | 19.6  | 13'                    | 150.0            | 152.6 | 151.8 | 150.2 |
| 15                     | 29.3             | 31.6  | 34.3  | 28.5  | 14'                    | 28.5             | 30.3  | 30.3  | 29.4  |
| 16                     | 39.0             | 49.4  | 45.4  | 45.7  | 15'                    | 27.7             | 31.4  | 31.2  | 30.0  |
| 17                     | 57.5             | 56.3  | 60.1  | 52.5  | 16'                    | 47.9             | 50.2  | 48.8  | 48.3  |
| 18                     | 13.7             | 14.7  | 15.0  | 12.1  | 17'                    | 69.5             | 66.9  | 67.8  | 66.6  |
| 19                     | 117.7            | 122.4 | 121.5 | 121.0 | 18'                    | 13.0             | 15.1  | 14.7  | 11.4  |
| 20                     | 140.5            | 142.5 | 142.6 | 145.0 | 19'                    | 122.2            | 122.8 | 122.7 | 121.5 |
| 21                     | 52.3             | 55.0  | 53.8  | 57.3  | 20'                    | 133.8            | 139.0 | 138.1 | 138.3 |
| 22                     | 167.7            | 173.1 | 171.6 | 169.0 | 21'                    | 58.1             | 56.3  | 57.4  | 57.8  |
| RMSD <sup>e</sup> :    |                  |       |       |       | 3.0                    |                  |       |       |       |
| MD <sup>e</sup> :      |                  |       |       |       | 10.4                   |                  |       |       |       |

<sup>a</sup>: Data for method 1 (current study – see Table 7 of the main text for details on the model chemistry)

<sup>b</sup>: Data for method 2 (current study – see Table 7 of the main text for details on the model chemistry)

<sup>c</sup>: Data from Semenov and Krivdin [32], PCM-PBE0/pcSseg-2//pcseg-2. Geometries at PCM-B3LYP/aug-cc-pVQZ//cc-pVQZ.

<sup>d</sup>: Experimental data from A.T. Tchinda, *et al.* [33].

<sup>e</sup>: RMSD = Root mean square deviation, MD = maximum deviation (largest errors highlighted in blue).

**Table S20.** Comparison of DFT  $\delta_H$  predictions for **sungucine**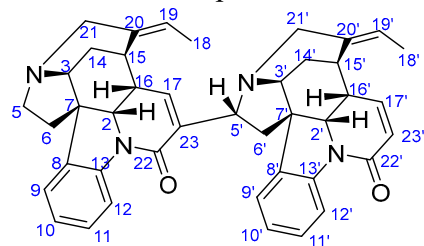

| Method:           | 1 <sup>a</sup>   | 2 <sup>b</sup> | Lit. <sup>c</sup> |                 |             | Method:           | 1 <sup>a</sup>     | 2 <sup>b</sup> | Lit. <sup>c</sup> |                 |      |
|-------------------|------------------|----------------|-------------------|-----------------|-------------|-------------------|--------------------|----------------|-------------------|-----------------|------|
| Expt <sup>d</sup> | DFT              | DFT            | DFT               | ML <sup>e</sup> |             | Expt <sup>d</sup> | DFT                | DFT            | DFT               | ML <sup>e</sup> |      |
| Atom              | $\delta_H$ (ppm) |                |                   |                 |             | Atom              | $\delta_H$ (ppm)   |                |                   |                 |      |
| 2                 | 4.31             | 3.84           | 4.14              | 4.03            | 4.01        | 2'                | 4.38               | 4.35           | 4.43              | 4.23            | 4.04 |
| 3                 | 3.28             | 3.46           | 3.47              | 3.27            | 3.45        | 3'                | 3.65               | 3.49           | 3.63              | 3.58            | 3.51 |
| 5a                | 3.07             | 2.96           | 3.07              | 3.08            | 3.37        | 5'                | 4.22               | 4.23           | 4.29              | <b>3.58</b>     | 4.24 |
| 5b                | 3.20             | 3.10           | 3.11              | 3.15            | <b>4.31</b> | 6'a               | 2.29               | 2.33           | 2.42              | 2.26            | 2.70 |
| 6a                | 2.16             | <b>1.65</b>    | 1.89              | 1.81            | 2.21        | 6'b               | 2.64               | 2.70           | 2.85              | 2.64            | 2.88 |
| 6b                | 2.56             | 2.46           | 2.53              | 2.70            | 3.06        | 9'                | 7.30               | 7.41           | 7.19              | 7.21            | 7.24 |
| 9                 | 7.27             | 7.37           | 7.45              | 7.24            | 7.27        | 10'               | 7.09               | 6.89           | 6.97              | 7.07            | 7.30 |
| 10                | 7.12             | 6.99           | 7.10              | 7.08            | 7.21        | 11'               | 7.29               | 7.12           | 7.15              | 7.23            | 7.47 |
| 11                | 7.25             | 6.96           | 7.16              | 7.21            | 7.44        | 12'               | 8.28               | 8.25           | 8.16              | 8.25            | 8.08 |
| 12                | 8.23             | 8.51           | 8.13              | 8.29            | 8.10        | 14'a              | 1.83               | 1.65           | 1.73              | 1.84            | 1.25 |
| 14a               | 1.81             | 1.57           | 1.53              | 1.79            | 1.32        | 14'b              | 1.86               | 1.86           | 2.00              | 1.91            | 1.57 |
| 14b               | 1.84             | 1.92           | 1.70              | 1.87            | 1.53        | 15'               | 2.73               | 2.94           | 2.70              | 2.71            | 2.61 |
| 15                | 2.72             | 2.57           | 2.84              | 2.66            | 2.39        | 16'               | 2.78               | 2.75           | 2.70              | 2.67            | 2.91 |
| 16                | 2.71             | 2.33           | 2.77              | 2.52            | 2.82        | 17'               | 6.85               | 6.95           | 6.93              | 7.03            | 7.36 |
| 17                | 7.06             | 7.21           | <b>7.37</b>       | 7.40            | 7.17        | 18'               | 1.65               | 1.69           | 1.79              | 1.88            | 1.88 |
| 18                | 1.75             | 1.83           | 1.85              | 1.93            | 1.84        | 19'               | 5.21               | 5.26           | 5.39              | 5.51            | 5.79 |
| 19                | 5.38             | 5.35           | 5.32              | 5.60            | 5.68        | 21'a              | 2.90               | 2.86           | 2.93              | 2.92            | 3.47 |
| 21a               | 3.25             | 3.03           | 3.11              | 2.99            | 3.47        | 21'b              | 3.64               | 3.63           | 3.51              | 3.61            | 3.48 |
| 21b               | 3.63             | 3.72           | 3.74              | 3.75            | 3.59        | 23'               | 6.02               | 5.99           | 5.92              | 5.95            | 6.12 |
|                   |                  |                |                   |                 |             |                   | RMSD: <sup>f</sup> | 0.18           | 0.14              | 0.18            | 0.34 |
|                   |                  |                |                   |                 |             |                   | MD: <sup>f</sup>   | 0.51           | 0.31              | 0.64            | 1.11 |

<sup>a</sup>: Data for method 1 (current study – see Table 7 of the main text for details on the model chemistry)

<sup>b</sup>: Data for method 2 (current study – see Table 7 of the main text for details on the model chemistry)

<sup>c</sup>: DFT GIAO calculations of <sup>1</sup>H and <sup>13</sup>C NMR chemical shifts at the mPW1PW91/6-311G(d,p) level on M06-2X/cc-pVTZ//aug-cc-pVTZ geometries (i.e., cc-pVTZ basis set used for H and C while aug-cc-pVTZ was used for O and N). An implicit solvent model (PCM) for chloroform was employed for both geometries and NMR calculations. Isotropic shielding values were converted to chemical shifts by subtracting from the calculated shielding for TMS [34].

<sup>d</sup>: Experimental data from Frederich, *et. al.* [35] in CDCl<sub>3</sub> acquired at 25°C on a 400 MHz NMR spectrometer and referenced to TMS. Single crystal XRD was reported by Lamotte, *et. al.* [36].

<sup>e</sup>: Results from Machine Learning (ML) / DFT approach that were calculated using an online app at <http://nova.chem.colostate.edu/cascade>; method details are from Ref [6].

<sup>f</sup>: RMSD = Root mean square deviation, MD = maximum deviation compared to experiment (largest errors highlighted in blue).

**Table S21.** Comparison of DFT  $\delta_c$  predictions for **sungucine**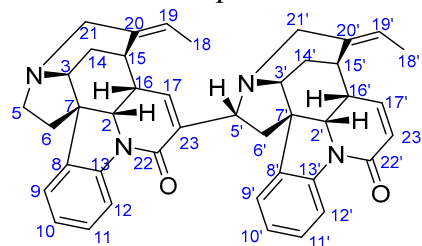

| Atom             | Method:<br>Expt <sup>d</sup> | 1 <sup>a</sup><br>DFT | 2 <sup>b</sup><br>DFT | Lit. <sup>c</sup><br>DFT | ML <sup>e</sup> | Atom             | Method:<br>Expt <sup>d</sup> | 1 <sup>a</sup><br>DFT | 2 <sup>b</sup><br>DFT | Lit. <sup>c</sup><br>DFT | ML <sup>e</sup> |
|------------------|------------------------------|-----------------------|-----------------------|--------------------------|-----------------|------------------|------------------------------|-----------------------|-----------------------|--------------------------|-----------------|
| $\delta_c$ (ppm) |                              |                       |                       |                          |                 | $\delta_c$ (ppm) |                              |                       |                       |                          |                 |
| 2                | 64.4                         | 67.4                  | 67.3                  | 64.6                     | 65.7            | 2'               | 64.9                         | 66.9                  | 66.9                  | 63.8                     | 65.2            |
| 3                | 65.7                         | 64.2                  | 65.1                  | 64.9                     | 64.3            | 3'               | 64.3                         | 64.8                  | 65.0                  | 65.3                     | 63.5            |
| 5                | 53.8                         | 52.0                  | 52.5                  | 51.1                     | 48.5            | 5'               | 62.1                         | 63.7                  | 63.5                  | 60.4                     | 61.5            |
| 6                | 37.2                         | 38.8                  | 38.2                  | 36.8                     | 36.3            | 6'               | 45.6                         | 47.1                  | 46.0                  | 46.1                     | 42.9            |
| 7                | 52.5                         | 54.5                  | 54.1                  | 52.9                     | 55.5            | 7'               | 52.7                         | 54.9                  | 54.1                  | 53.0                     | 56.3            |
| 8                | 136.3                        | 136.0                 | 136.8                 | 134.5                    | 136.5           | 8'               | 134.2                        | 135.1                 | 135.5                 | 134.2                    | 134.5           |
| 9                | 122.4                        | 122.9                 | 122.8                 | 121.3                    | 123.7           | 9'               | 122.5                        | 122.9                 | 122.9                 | 121.2                    | 123.9           |
| 10               | 124.5                        | 122.7                 | 122.9                 | 122.5                    | 122.4           | 10'              | 124.1                        | 122.4                 | 122.7                 | 122.6                    | 122.5           |
| 11               | 128.3                        | 127.9                 | 127.9                 | 127.4                    | 129.2           | 11'              | 128.5                        | 128.2                 | 128.2                 | 127.6                    | 129.3           |
| 12               | 116.3                        | 115.5                 | 115.6                 | 115.3                    | 116.6           | 12'              | 116.5                        | 115.2                 | 115.3                 | 115.3                    | 115.9           |
| 13               | 141.3                        | 143.2                 | <b>136.8</b>          | 141.4                    | 142.4           | 13'              | 141.8                        | 143.4                 | 143.0                 | 141.3                    | 142.0           |
| 14               | 22.5                         | 23.2                  | 22.8                  | 21.1                     | <b>30.6</b>     | 14'              | 23.5                         | 23.5                  | 22.9                  | 21.5                     | 30.8            |
| 15               | 31.1                         | 33.3                  | 33.7                  | 33.0                     | 37.4            | 15'              | 31.4                         | 33.1                  | 33.4                  | 32.5                     | 38.0            |
| 16               | 37.7                         | 41.8                  | 40.7                  | 41.0                     | 37.4            | 16'              | 40.3                         | 42.6                  | 42.2                  | 41.5                     | 39.7            |
| 17               | 137.1                        | 139.9                 | 139.9                 | 138.1                    | 132.7           | 17'              | 143.4                        | 146.1                 | 146.1                 | 145.3                    | 144.8           |
| 18               | 13.2                         | 14.6                  | 14.5                  | 13.1                     | 13.9            | 18'              | 13.0                         | 14.6                  | 14.5                  | 13.0                     | 14.4            |
| 19               | 119.0                        | 121.4                 | 121.1                 | 122.5                    | 124.3           | 19'              | 119.6                        | 121.7                 | 121.6                 | 122.8                    | 123.8           |
| 20               | 140.7                        | <b>145.1</b>          | 144.8                 | <b>146.1</b>             | 139.9           | 20'              | 142.5                        | 144.7                 | 144.9                 | 145.9                    | 139.8           |
| 21               | 52.5                         | 51.4                  | 51.7                  | 51.9                     | 55.1            | 21'              | 50.2                         | 50.0                  | 50.1                  | 49.7                     | 56.1            |
| 22               | 162.5                        | 163.3                 | 162.9                 | 159.6                    | 160.7           | 22'              | 161.7                        | 161.8                 | 161.7                 | 158.4                    | 160.6           |
| 23               | 135.1                        | 138.2                 | 136.8                 | 136.3                    | 137.4           | 23'              | 123.5                        | 123.9                 | 123.6                 | 123.5                    | 123.9           |
|                  |                              | RMSD: <sup>f</sup>    |                       |                          |                 |                  |                              | 1.9                   | 1.8                   | 1.8                      | 3.1             |
|                  |                              | MD: <sup>f</sup>      |                       |                          |                 |                  |                              | 4.4                   | 4.5                   | 5.4                      | 8.1             |

<sup>a</sup>: Data for method 1 (current study – see Table 7 of the main text for details on the model chemistry)

<sup>b</sup>: Data for method 2 (current study – see Table 7 of the main text for details on the model chemistry)

<sup>c</sup>: DFT GIAO calculations of  $^1\text{H}$  and  $^{13}\text{C}$  NMR chemical shifts at the mPW1PW91/6-311G(d,p) level on M06-2X/cc-pVTZ//aug-cc-pVTZ geometries (i.e., cc-pVTZ basis set used for H and C while aug-cc-pVTZ was used for O and N). An implicit solvent model (PCM) for chloroform was employed for both geometries and NMR calculations. Isotropic shielding values were converted to chemical shifts by subtracting from the calculated shielding for TMS [34].

<sup>d</sup>: Experimental data from Frederich, *et. al.* [35] in  $\text{CDCl}_3$  acquired at 25°C on a 400 MHz NMR spectrometer and referenced to TMS. Single crystal XRD was reported by Lamotte, *et. al.* [36].

<sup>e</sup>: Results from Machine Learning (ML) / DFT approach that were calculated using an online app at <http://nova.chem.colostate.edu/cascade>; method details are from Ref [6].

<sup>f</sup>: RMSD = Root mean square deviation, MD = maximum deviation compared to experiment (largest errors highlighted in blue).

**Table S22.** Comparison of DFT  $\delta_{\text{H}}$  and  $\delta_{\text{C}}$  predictions for **paclitaxel**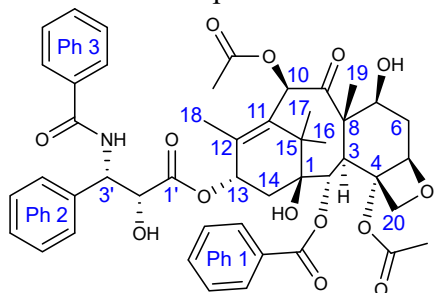

| Method: $\delta_{\text{H}}$ (ppm) |                   |                    |                    | Method: $\delta_{\text{C}}$ (ppm) |                   |                    |                                         |
|-----------------------------------|-------------------|--------------------|--------------------|-----------------------------------|-------------------|--------------------|-----------------------------------------|
| Atom                              | Expt <sup>d</sup> | 1 <sup>a</sup> DFT | 2 <sup>b</sup> DFT | Atom                              | Expt <sup>d</sup> | 1 <sup>a</sup> DFT | 2 <sup>b</sup> DFT Lit <sup>c</sup> DFT |
| 2                                 | 5.67              | <b>5.24</b>        | 5.54               | 1                                 | 79.0              | 81.8               | 81.1 81.6                               |
| 3                                 | 3.79              | 3.81               | 3.85               | 2                                 | 74.9              | 77.0               | 76.0 76.3                               |
| 4 OAc Me                          | 2.38              | 2.71               | 2.75               | 3                                 | 45.6              | 46.9               | 46.0 43.0                               |
| 5                                 | 4.94              | 4.66               | 4.88               | 4                                 | 81.1              | 82.4               | 82.5 79.5                               |
| 6a                                | 2.54              | 2.48               | 2.38               | 4 OAc C=O                         | 170.4             | 172.9              | 172.9 168.6                             |
| 6b                                | 1.88              | 1.75               | 1.80               | 4 OAc Me                          | 22.6              | 23.8               | 24.4 23.3                               |
| 7                                 | 4.40              | 4.31               | 4.41               | 5                                 | 84.4              | 82.3               | 82.4 87.9                               |
| 10                                | 6.27              | 6.15               | 6.30               | 6                                 | 35.6              | 35.9               | 35.6 37.0                               |
| 10 OAc Me                         | 2.23              | 2.31               | 2.34               | 7                                 | 72.2              | 73.7               | 74.0 77.6                               |
| 13                                | 6.23              | 6.22               | 6.47               | 8                                 | 58.6              | 61.5               | 60.6 63.6                               |
| 14a                               | 2.35              | 2.40               | 2.53               | 9                                 | 203.6             | 210.4              | 209.1 207.6                             |
| 14b                               | 2.28              | 1.99               | 1.84               | 10                                | 75.5              | 78.4               | 78.1 <b>84.6</b>                        |
| 16                                | 1.14              | 1.02               | 1.09               | 10 OAc C=O                        | 171.2             | 173.2              | 172.7 170.8                             |
| 17                                | 1.24              | 1.24               | 1.16               | 10 OAc Me                         | 20.8              | 21.7               | 21.1 21.2                               |
| 17                                | 1.79              | 1.76               | 1.85               | 11                                | 133.2             | 135.1              | 133.2 136.8                             |
| 19                                | 1.68              | 1.77               | 1.76               | 12                                | 142.0             | 147.9              | 147.3 149.2                             |
| 20a                               | 4.30              | 4.24               | 4.34               | 13                                | 72.3              | 74.5               | 73.9 72.4                               |
| 20b                               | 4.19              | 3.88               | 4.23               | 14                                | 35.7              | 37.3               | 36.6 41.6                               |
| 2'                                | 4.78              | 4.84               | 5.09               | 15                                | 43.2              | 46.2               | 45.6 48.7                               |
| 3'                                | 5.78              | 5.67               | 5.93               | 16                                | 21.8              | 23.6               | 23.4 21.6                               |
| 3' NH                             | 7.01              | 6.99               | 7.08               | 17                                | 26.9              | 28.4               | 26.7 23.4                               |

<sup>a</sup>: Data for method 1 (current study – see Table 7 of the main text for details on the model chemistry)

<sup>b</sup>: Data for method 2 (current study – see Table 7 of the main text for details on the model chemistry)

<sup>c</sup>: Calculated  $^{13}\text{C}$  chemical shifts from Ref [37]. No calculated  $^1\text{H}$  NMR data were reported.

<sup>d</sup>: Experimental data from Ref [38] in  $\text{CDCl}_3$  on a 500 MHz NMR spectrometer.  $^1\text{H}$  chemical shifts were referenced to TMS at 0.00 ppm, and  $^{13}\text{C}$  chemical shifts were referenced to  $\text{CDCl}_3$  at 77.00 ppm.

Note: Table continued on next page.



**Table S22** (continued). Comparison of DFT  $\delta_H$  and  $\delta_C$  predictions for **paclitaxel**

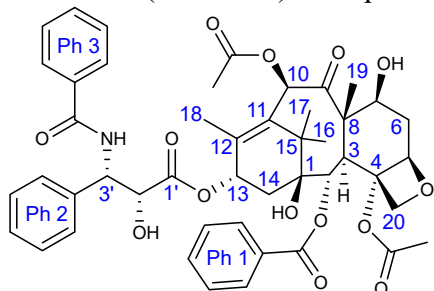

| Atom               | Method:<br>Expt <sup>d</sup> | 1 <sup>a</sup><br>DFT | 2 <sup>b</sup><br>DFT | Atom               | Method:<br>Expt <sup>d</sup> | 1 <sup>a</sup><br>DFT | 2 <sup>b</sup><br>DFT | Lit <sup>c</sup><br>DFT |
|--------------------|------------------------------|-----------------------|-----------------------|--------------------|------------------------------|-----------------------|-----------------------|-------------------------|
| $\delta_H$ (ppm)   |                              |                       |                       | $\delta_C$ (ppm)   |                              |                       |                       |                         |
| <i>o</i> Ph 1      | 8.13                         | 8.50                  | <b>8.65</b>           | 18                 | 14.8                         | 16.9                  | 17.6                  | 16.8                    |
| <i>m</i> Ph 1      | 7.51                         | 7.60                  | 7.49                  | 19                 | 9.5                          | 12.4                  | 12.2                  | 16.1                    |
| <i>p</i> Ph 1      | 7.61                         | 7.71                  | 7.57                  | 20                 | 76.5                         | 73.5                  | 73.9                  | 75.5                    |
| <i>o</i> Ph 2      | 7.48                         | 7.75                  | 7.63                  | 1'                 | 172.7                        | 176.9                 | 174.8                 | 172.2                   |
| <i>m</i> Ph 2      | 7.42                         | 7.42                  | 7.40                  | 2'                 | 73.2                         | 74.4                  | 74.1                  | 81.1                    |
| <i>p</i> Ph 2      | 7.35                         | 7.40                  | 7.34                  | 3'                 | 55.0                         | 57.8                  | 56.8                  | 60.1                    |
| <i>o</i> Ph 3      | 7.74                         | 7.76                  | 7.54                  | C=O Ph 1           | 167.0                        | 169.4                 | 167.1                 | 165.1                   |
| <i>m</i> Ph 3      | 7.40                         | 7.30                  | 7.10                  | <i>q</i> Ph 1      | 129.1                        | 128.9                 | 128.7                 | 130.5                   |
| <i>p</i> Ph 3      | 7.49                         | 7.43                  | 7.35                  | <i>o</i> Ph 1      | 130.2                        | 132.4                 | 133.4                 | 130.5                   |
|                    |                              |                       |                       | <i>m</i> Ph 1      | 128.7                        | 127.9                 | 127.7                 | 126.4                   |
|                    |                              |                       |                       | <i>p</i> Ph 1      | 133.7                        | 134.3                 | 134.3                 | 131.7                   |
|                    |                              |                       |                       | <i>q</i> Ph 2      | 133.6                        | <b>140.8</b>          | <b>140.0</b>          | 138.5                   |
|                    |                              |                       |                       | <i>o</i> Ph 2      | 127.0                        | 128.5                 | 127.7                 | 127.5                   |
|                    |                              |                       |                       | <i>m</i> Ph 2      | 128.7                        | 128.1                 | 128.2                 | 128.2                   |
|                    |                              |                       |                       | <i>p</i> Ph 2      | 131.9                        | 127.6                 | 127.4                 | 127.1                   |
|                    |                              |                       |                       | C=O Ph 3           | 167.0                        | 168.3                 | 167.9                 | 168.4                   |
|                    |                              |                       |                       | <i>q</i> Ph 3      | 138.0                        | 134.1                 | 134.5                 | 133.5                   |
|                    |                              |                       |                       | <i>o</i> Ph 3      | 127.0                        | 128.2                 | 128.6                 | 127.4                   |
|                    |                              |                       |                       | <i>m</i> Ph 3      | 129.0                        | 127.9                 | 127.6                 | 126.7                   |
|                    |                              |                       |                       | <i>p</i> Ph 3      | 128.3                        | 131.9                 | 131.7                 | 131.0                   |
|                    |                              |                       |                       | RMSD: <sup>e</sup> |                              |                       |                       |                         |
|                    |                              |                       |                       | 2.8                |                              |                       |                       |                         |
|                    |                              |                       |                       | MD: <sup>e</sup>   |                              |                       |                       |                         |
|                    |                              |                       |                       | 7.2                |                              |                       |                       |                         |
| RMSD: <sup>e</sup> |                              |                       |                       | 2.8                |                              |                       |                       |                         |
| MD: <sup>e</sup>   |                              |                       |                       | 7.2                |                              |                       |                       |                         |
| 0.17               |                              |                       |                       | 2.4                |                              |                       |                       |                         |
| 0.43               |                              |                       |                       | 6.4                |                              |                       |                       |                         |
| 0.19               |                              |                       |                       | 3.7                |                              |                       |                       |                         |
| 0.52               |                              |                       |                       | 9.1                |                              |                       |                       |                         |

<sup>a</sup>: Data for method 1 (current study – see Table 7 of the main text for details on the model chemistry)

<sup>b</sup>: Data for method 2 (current study – see Table 7 of the main text for details on the model chemistry)

<sup>c</sup>: Calculated  $^{13}\text{C}$  chemical shifts from Ref [37] using GIAO B3LYP/6-311+G(2d,p)//B3LYP/6-31G(d) model chemistry. Linear scaling factors were used to convert isotropic shielding values to chemical shifts. No calculated  $^1\text{H}$  NMR data were reported.

<sup>d</sup>: Experimental data from Ref [38] in  $\text{CDCl}_3$  on a 500 MHz NMR spectrometer.  $^1\text{H}$  chemical shifts were referenced to TMS at 0.00 ppm, and  $^{13}\text{C}$  chemical shifts were referenced to  $\text{CDCl}_3$  at 77.00 ppm.

<sup>e</sup>: RMSD = root mean square deviation, MD = maximum deviation; multiplets were not used for RMSD and MD calculations (largest errors highlighted in blue).

**Table S23.** Comparison of DFT  $\delta_{\text{H}}$  and  $\delta_{\text{C}}$  predictions for **sungucine** versus its 5'-epimer

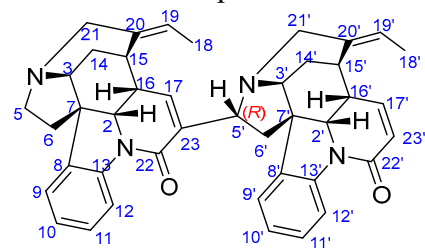

| Expt <sup>a</sup><br>5'(R)    |      |                           | DFT <sup>b</sup><br>5'(R) |      |      | DFT <sup>b</sup><br>5'(S) |       |                               | Expt <sup>a</sup><br>5'(R) |                           |        | DFT <sup>b</sup><br>5'(R) |        |                           | DFT <sup>b</sup><br>5'(S) |  |  |
|-------------------------------|------|---------------------------|---------------------------|------|------|---------------------------|-------|-------------------------------|----------------------------|---------------------------|--------|---------------------------|--------|---------------------------|---------------------------|--|--|
| Atom                          |      | $\delta_{\text{H}}$ (ppm) |                           | Atom |      | $\delta_{\text{H}}$ (ppm) |       | Atom                          |                            | $\delta_{\text{C}}$ (ppm) |        | Atom                      |        | $\delta_{\text{C}}$ (ppm) |                           |  |  |
| 2                             | 4.31 | 4.215                     | 4.223                     | 2'   | 4.38 | 4.371                     | 4.346 | 2                             | 64.38                      | 67.29                     | 66.54  | 2'                        | 64.89  | 67.25                     | 68.11                     |  |  |
| 3                             | 3.28 | 3.324                     | 3.306                     | 3'   | 3.65 | 3.554                     | 3.191 | 3                             | 65.71                      | 65.49                     | 65.32  | 3'                        | 64.29  | 64.99                     | 67.28                     |  |  |
| 5a                            | 3.07 | 3.037                     | 3.040                     | 5'   | 4.22 | 4.296                     | 4.585 | 5                             | 53.78                      | 52.50                     | 52.53  | 5'                        | 62.08  | 63.38                     | 59.56                     |  |  |
| 5b                            | 3.20 | 3.082                     | 3.105                     | 6'a  | 2.29 | 2.240                     | 2.442 | 6                             | 37.15                      | 37.99                     | 37.83  | 6'                        | 45.61  | 46.47                     | 45.32                     |  |  |
| 6a                            | 2.16 | 1.934                     | 1.917                     | 6'b  | 2.64 | 2.676                     | 2.539 | 7                             | 52.45                      | 54.30                     | 54.24  | 7'                        | 52.70  | 54.18                     | 54.26                     |  |  |
| 6b                            | 2.56 | 2.596                     | 2.578                     | 9'   | 7.30 | 7.190                     | 7.314 | 8                             | 136.25                     | 136.69                    | 136.34 | 8'                        | 134.17 | 135.37                    | 137.81                    |  |  |
| 9                             | 7.27 | 7.220                     | 7.191                     | 10'  | 7.09 | 7.032                     | 7.077 | 9                             | 122.37                     | 122.93                    | 122.87 | 9'                        | 122.45 | 122.81                    | 122.69                    |  |  |
| 10                            | 7.12 | 7.044                     | 7.078                     | 11'  | 7.29 | 7.224                     | 7.213 | 10                            | 124.46                     | 123.02                    | 123.13 | 10'                       | 124.10 | 122.68                    | 122.91                    |  |  |
| 11                            | 7.25 | 7.198                     | 7.258                     | 12'  | 8.28 | 8.196                     | 8.190 | 11                            | 128.31                     | 128.15                    | 128.29 | 11'                       | 128.48 | 128.35                    | 127.92                    |  |  |
| 12                            | 8.23 | 8.211                     | 8.269                     | 14'a | 1.83 | 1.757                     | 1.692 | 12                            | 116.29                     | 115.44                    | 115.72 | 12'                       | 116.54 | 115.26                    | 115.05                    |  |  |
| 14a                           | 1.81 | 1.727                     | 1.708                     | 14'b | 1.86 | 1.868                     | 1.890 | 13                            | 141.33                     | 143.00                    | 143.19 | 13'                       | 141.76 | 143.15                    | 142.68                    |  |  |
| 14b                           | 1.84 | 1.824                     | 1.842                     | 15'  | 2.73 | 2.746                     | 2.676 | 14                            | 22.46                      | 23.04                     | 23.01  | 14'                       | 23.46  | 22.88                     | 24.99                     |  |  |
| 15                            | 2.72 | 2.696                     | 2.797                     | 16'  | 2.78 | 2.761                     | 2.899 | 15                            | 31.11                      | 34.01                     | 33.96  | 15'                       | 31.37  | 33.58                     | 33.89                     |  |  |
| 16                            | 2.71 | 2.621                     | 2.593                     | 17'  | 6.85 | 6.938                     | 6.754 | 16                            | 37.69                      | 40.96                     | 41.66  | 16'                       | 40.33  | 42.33                     | 38.28                     |  |  |
| 17                            | 7.06 | 7.261                     | 6.945                     | 18'  | 1.65 | 1.782                     | 1.721 | 17                            | 137.08                     | 139.86                    | 145.37 | 17'                       | 143.43 | 146.16                    | 145.73                    |  |  |
| 18                            | 1.75 | 1.874                     | 1.847                     | 19'  | 5.21 | 5.163                     | 5.211 | 18                            | 13.17                      | 14.51                     | 14.83  | 18'                       | 12.98  | 14.38                     | 14.51                     |  |  |
| 19                            | 5.38 | 5.351                     | 5.353                     | 21'a | 2.90 | 2.856                     | 3.268 | 19                            | 119.03                     | 120.91                    | 120.46 | 19'                       | 119.58 | 121.98                    | 118.92                    |  |  |
| 21a                           | 3.25 | 3.050                     | 3.061                     | 21'b | 3.64 | 3.572                     | 3.370 | 20                            | 140.68                     | 145.06                    | 145.57 | 20'                       | 142.47 | 145.24                    | 144.45                    |  |  |
| 21b                           | 3.63 | 3.587                     | 3.587                     | 23'  | 6.02 | 5.939                     | 5.917 | 21                            | 52.53                      | 51.58                     | 51.35  | 21'                       | 50.21  | 50.13                     | 47.02                     |  |  |
|                               |      |                           |                           |      |      |                           |       | 22                            | 162.50                     | 162.86                    | 162.06 | 22'                       | 161.70 | 161.42                    | 161.57                    |  |  |
|                               |      |                           |                           |      |      |                           |       | 23                            | 135.13                     | 137.47                    | 133.69 | 23'                       | 123.46 | 123.76                    | 124.09                    |  |  |
| RMSD <sup>c</sup> : 0.09 0.15 |      |                           |                           |      |      |                           |       | RMSD <sup>c</sup> : 1.75 2.05 |                            |                           |        |                           |        |                           |                           |  |  |
| MD <sup>c</sup> : 0.23 0.46   |      |                           |                           |      |      |                           |       | MD <sup>c</sup> : 4.4 8.3     |                            |                           |        |                           |        |                           |                           |  |  |

<sup>a</sup>: Experimental data from Frederich, *et. al.* in CDCl<sub>3</sub> [35]. Single crystal XRD from Lamotte, *et. al.* [36].

<sup>b</sup>: DFT calculations using method 2 (see Table 7 of the main text for details on the model chemistry).

<sup>c</sup>: RMSD = Root mean square deviation, MD = maximum deviation compared to experiment.

#### IV. Homodimericin A NMR Spectra

Homodimericin A NMR spectra were originally acquired for the compound dissolved in DMSO-*d*<sub>6</sub>. For direct comparison to DFT calculations in chloroform, NMR spectra were acquired at 25°C for a 2-3 mg sample of this compound dissolved in 0.5 mL CDCl<sub>3</sub>, containing 0.03% v/v TMS, using a Bruker 600 MHz AVANCE III HD NMR spectrometer equipped with a 5-mm TXI CryoProbe™. <sup>1</sup>H, <sup>13</sup>C, <sup>1</sup>H-<sup>1</sup>H gradient COSY, multiplicity-edited <sup>1</sup>H-<sup>13</sup>C gradient HSQC (145 Hz <sup>1</sup>J<sub>CH</sub> optimization), <sup>1</sup>H-<sup>13</sup>C gradient HMBC (8 Hz <sup>n</sup>J<sub>CH</sub> optimization), and <sup>1</sup>H-<sup>1</sup>H gradient NOESY w/ zero-quantum suppression (500 ms mixing time) spectra were acquired for the purpose of accurately assigning all proton and carbon peaks. TMS at 0.00 ppm was used for <sup>1</sup>H and <sup>13</sup>C peak referencing. Note that the sample also contains approximately 25% homodimericin B as a synthetic impurity. Spectra were processed in Mestrelab Research's MestReNova, version 14.2.

<sup>1</sup>H 1D (599.90 MHz, CDCl<sub>3</sub>, 298.0 K) — homodimericin A

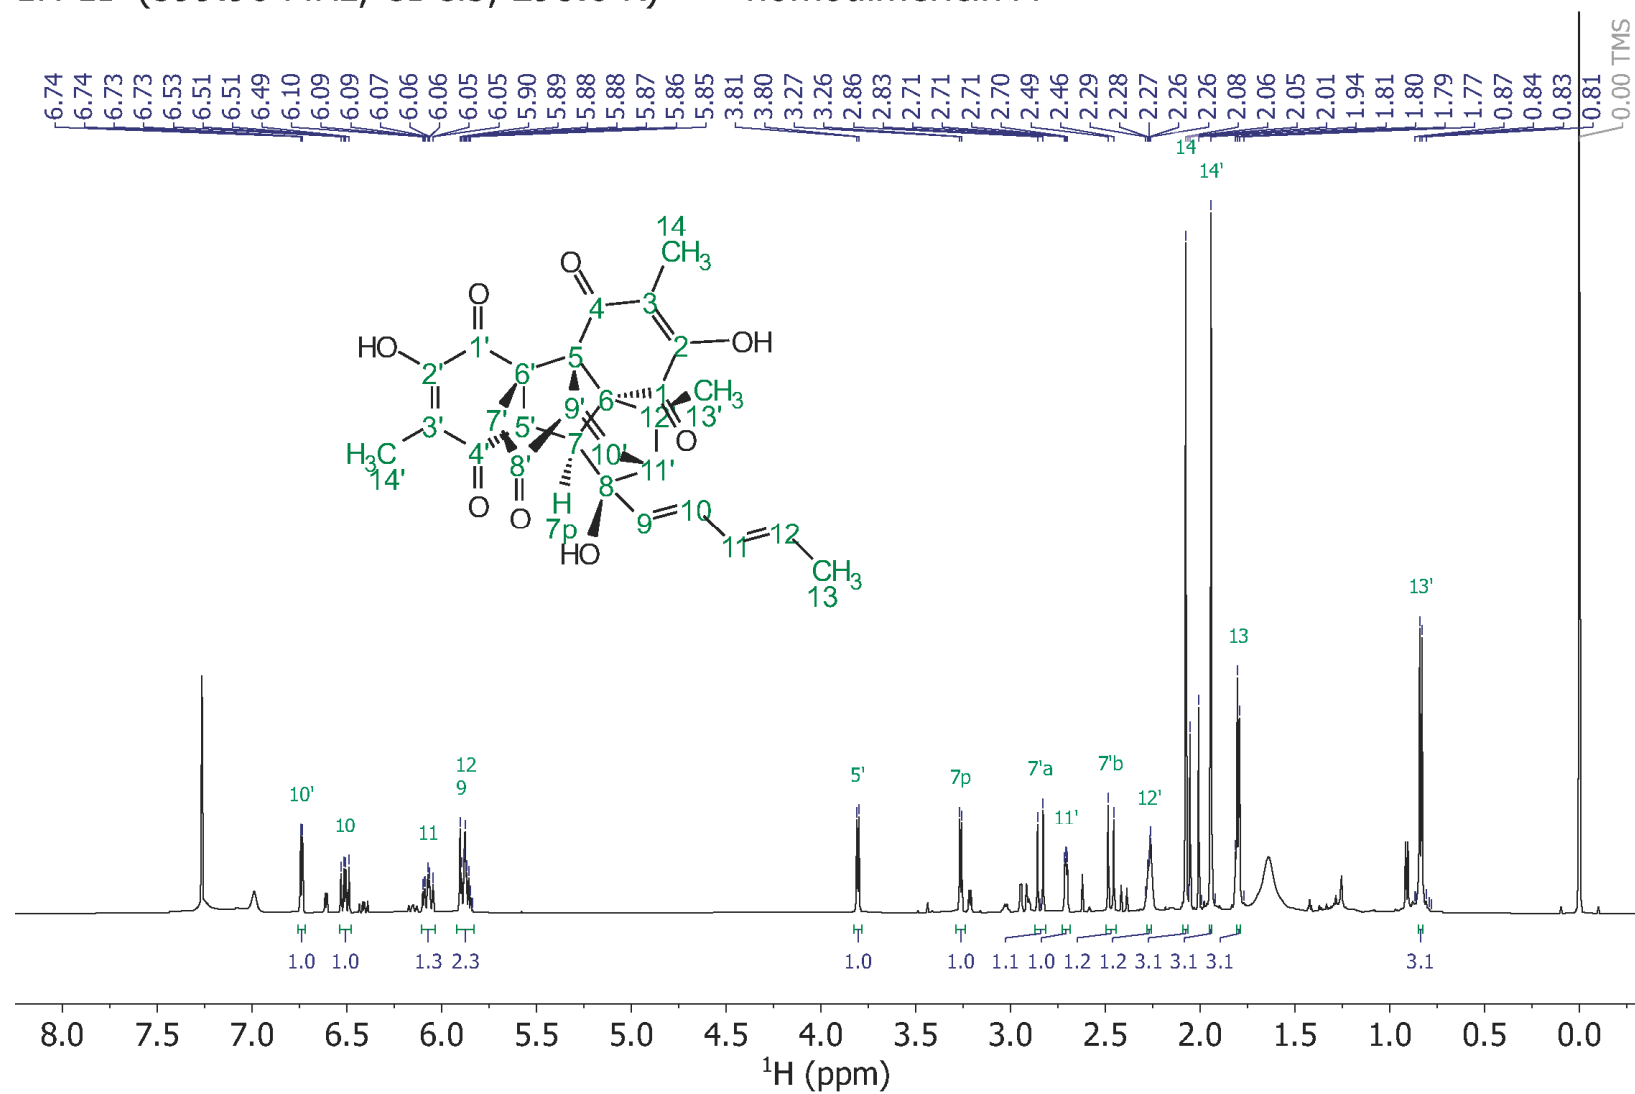

$^{13}\text{C}$  1D (150.86 MHz,  $\text{CDCl}_3$ , 298.0 K) — homodimericin A

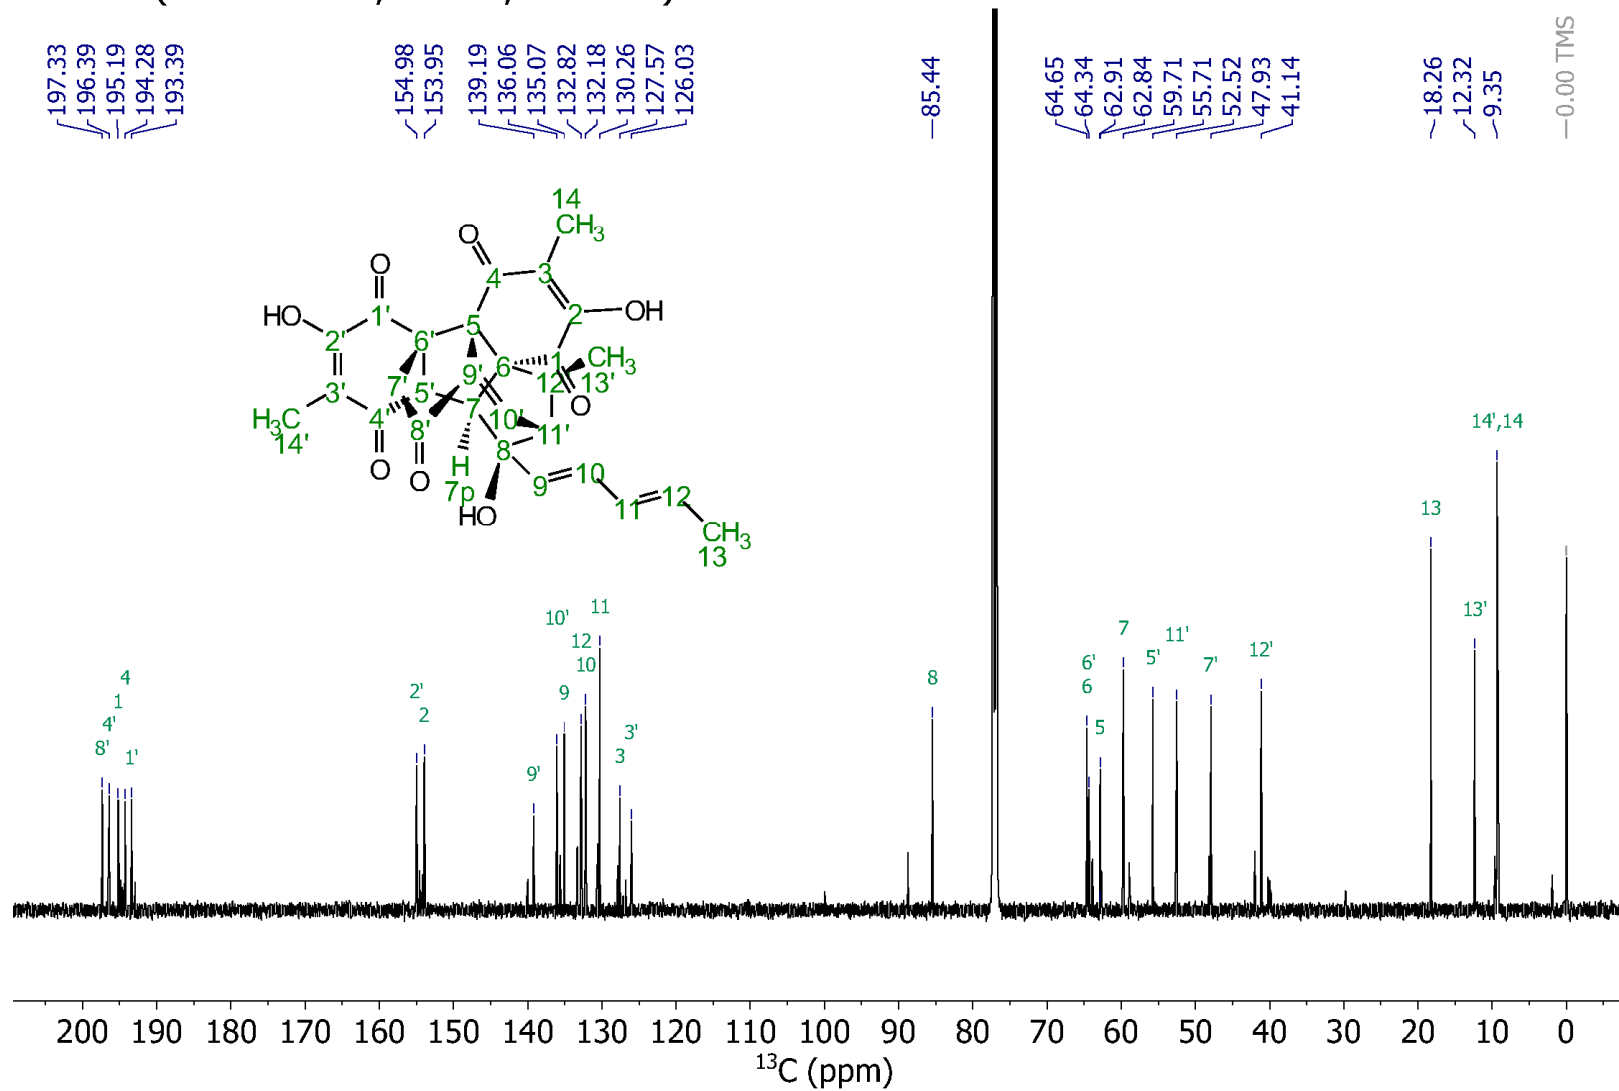

$^1\text{H}$  COSY (599.90 MHz,  $\text{CDCl}_3$ , 298.0 K) — homodimericin A

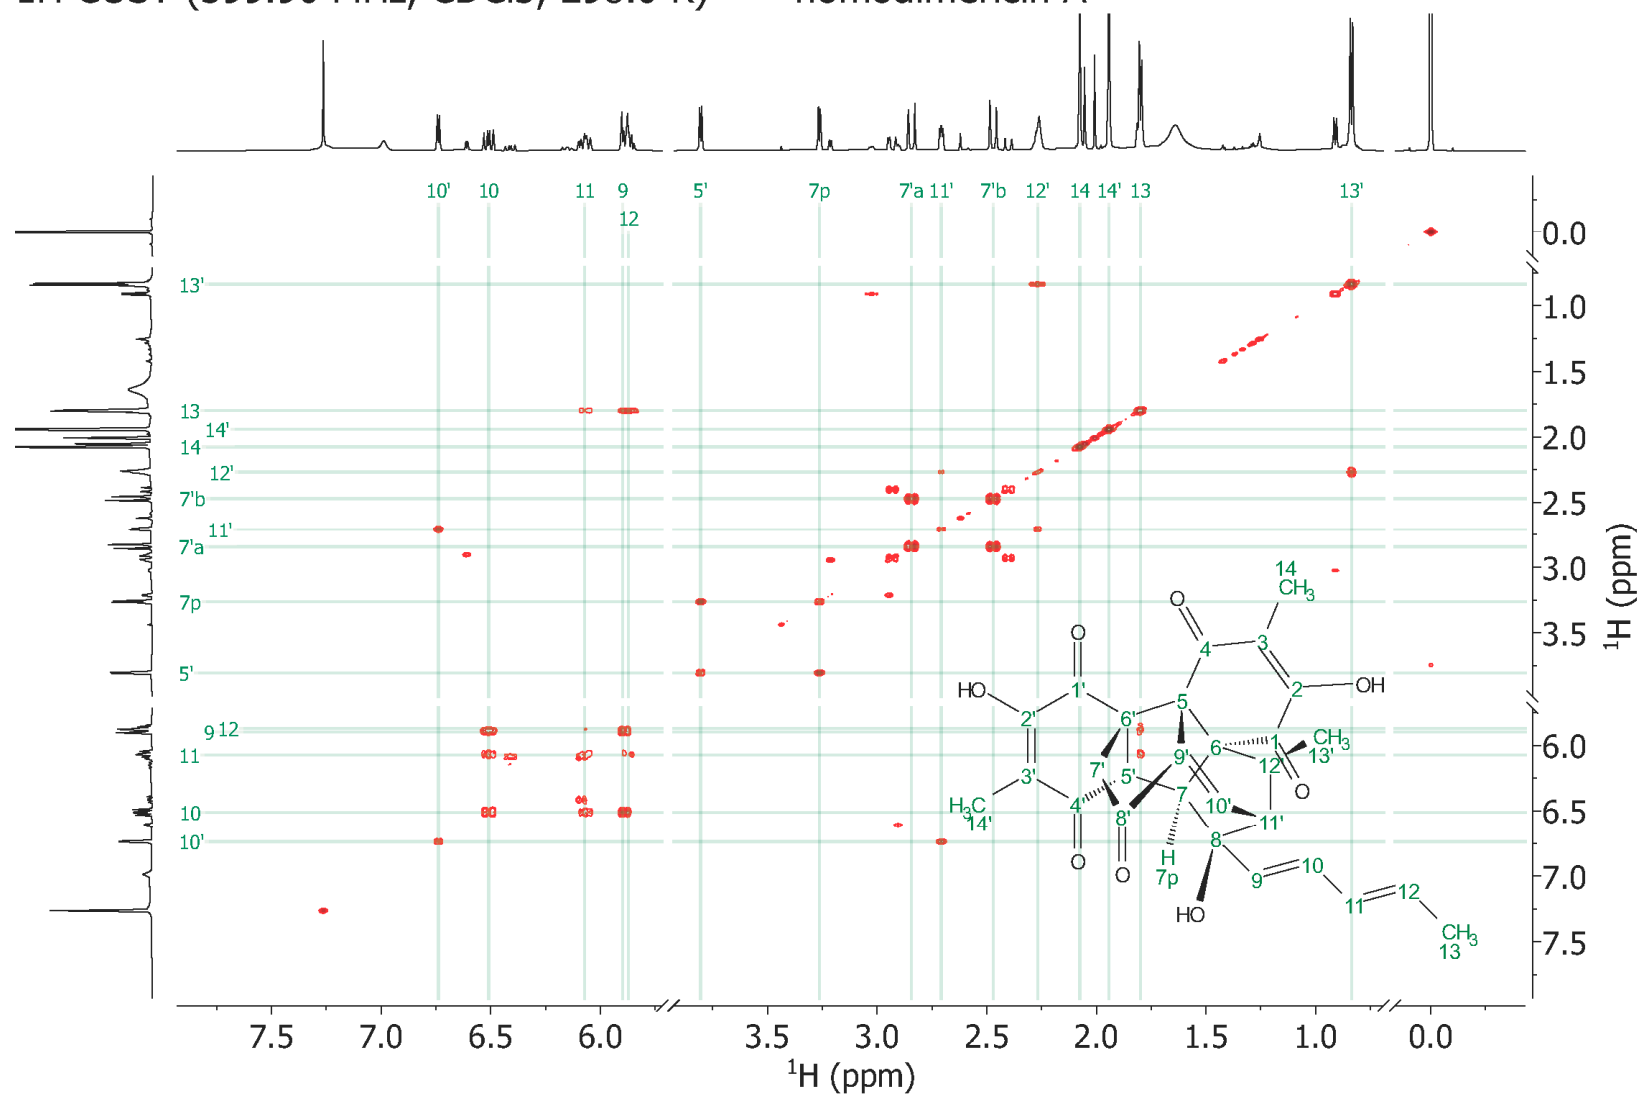

$^{13}\text{C}$  pure shift edited HSQC (599.90 MHz,  $\text{CDCl}_3$ , 298.0 K) — homodimericin A

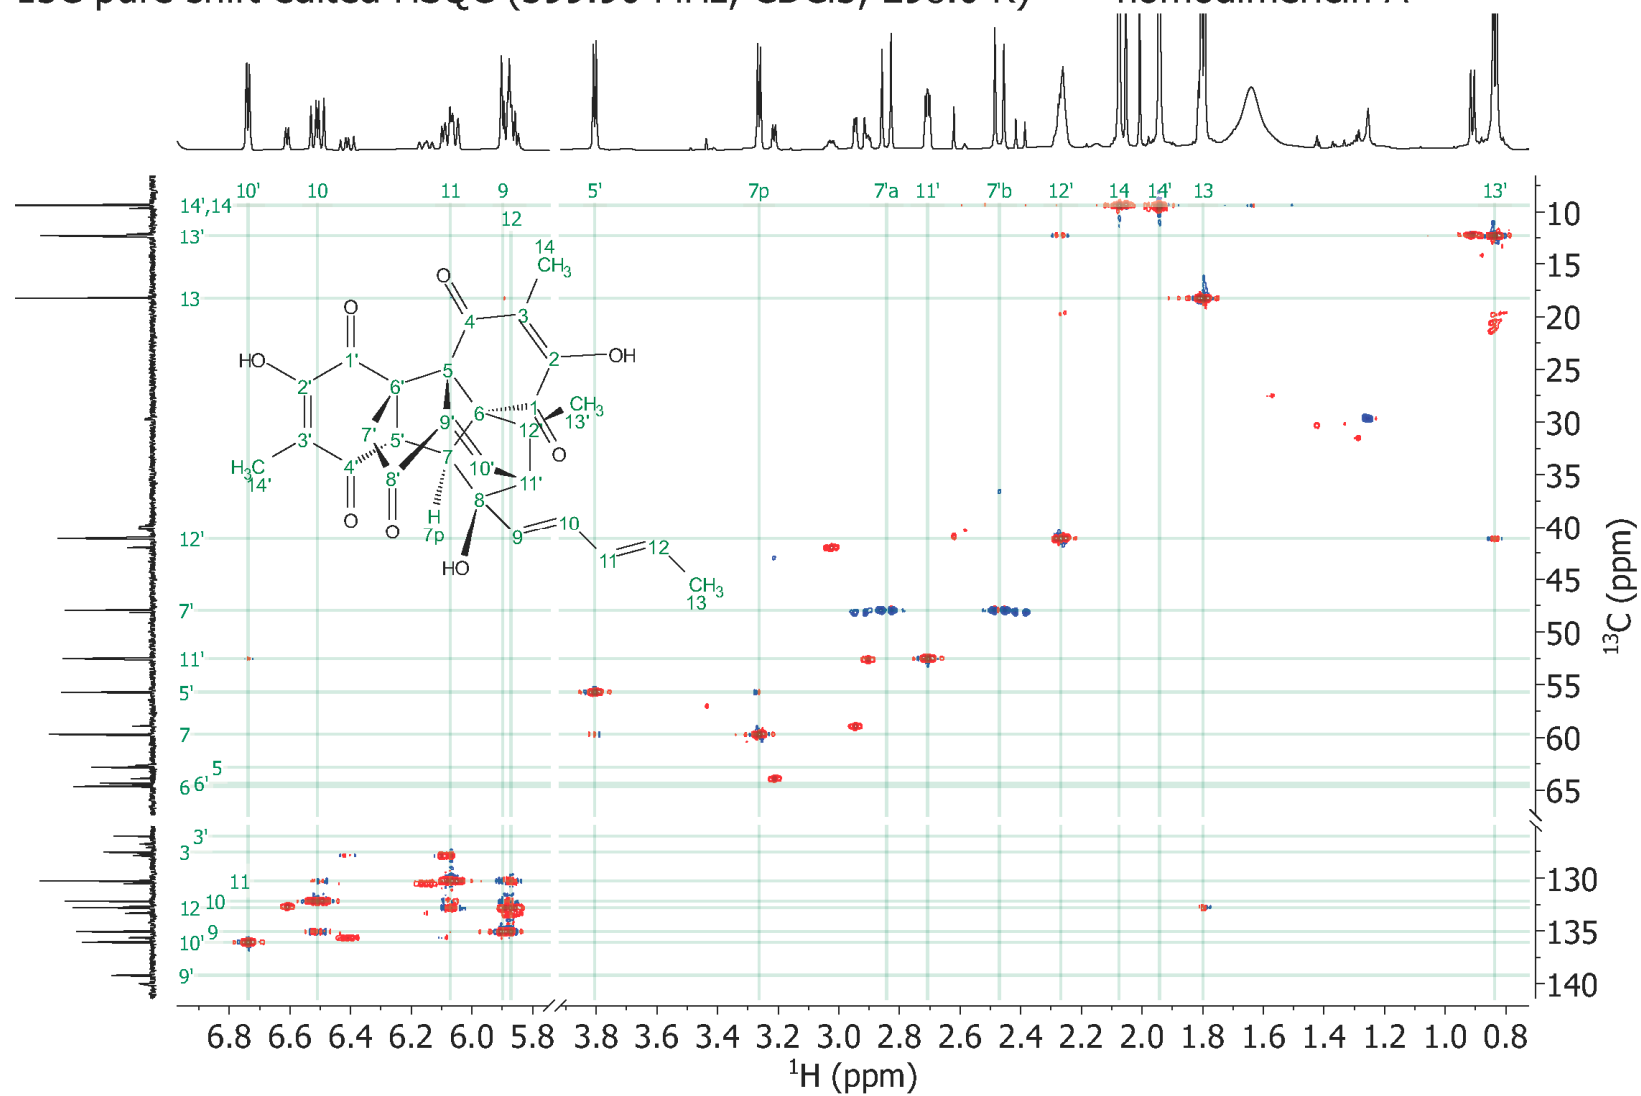

$^{13}\text{C}$  HMBC (599.90 MHz,  $\text{CDCl}_3$ , 298.0 K) — homodimericin A

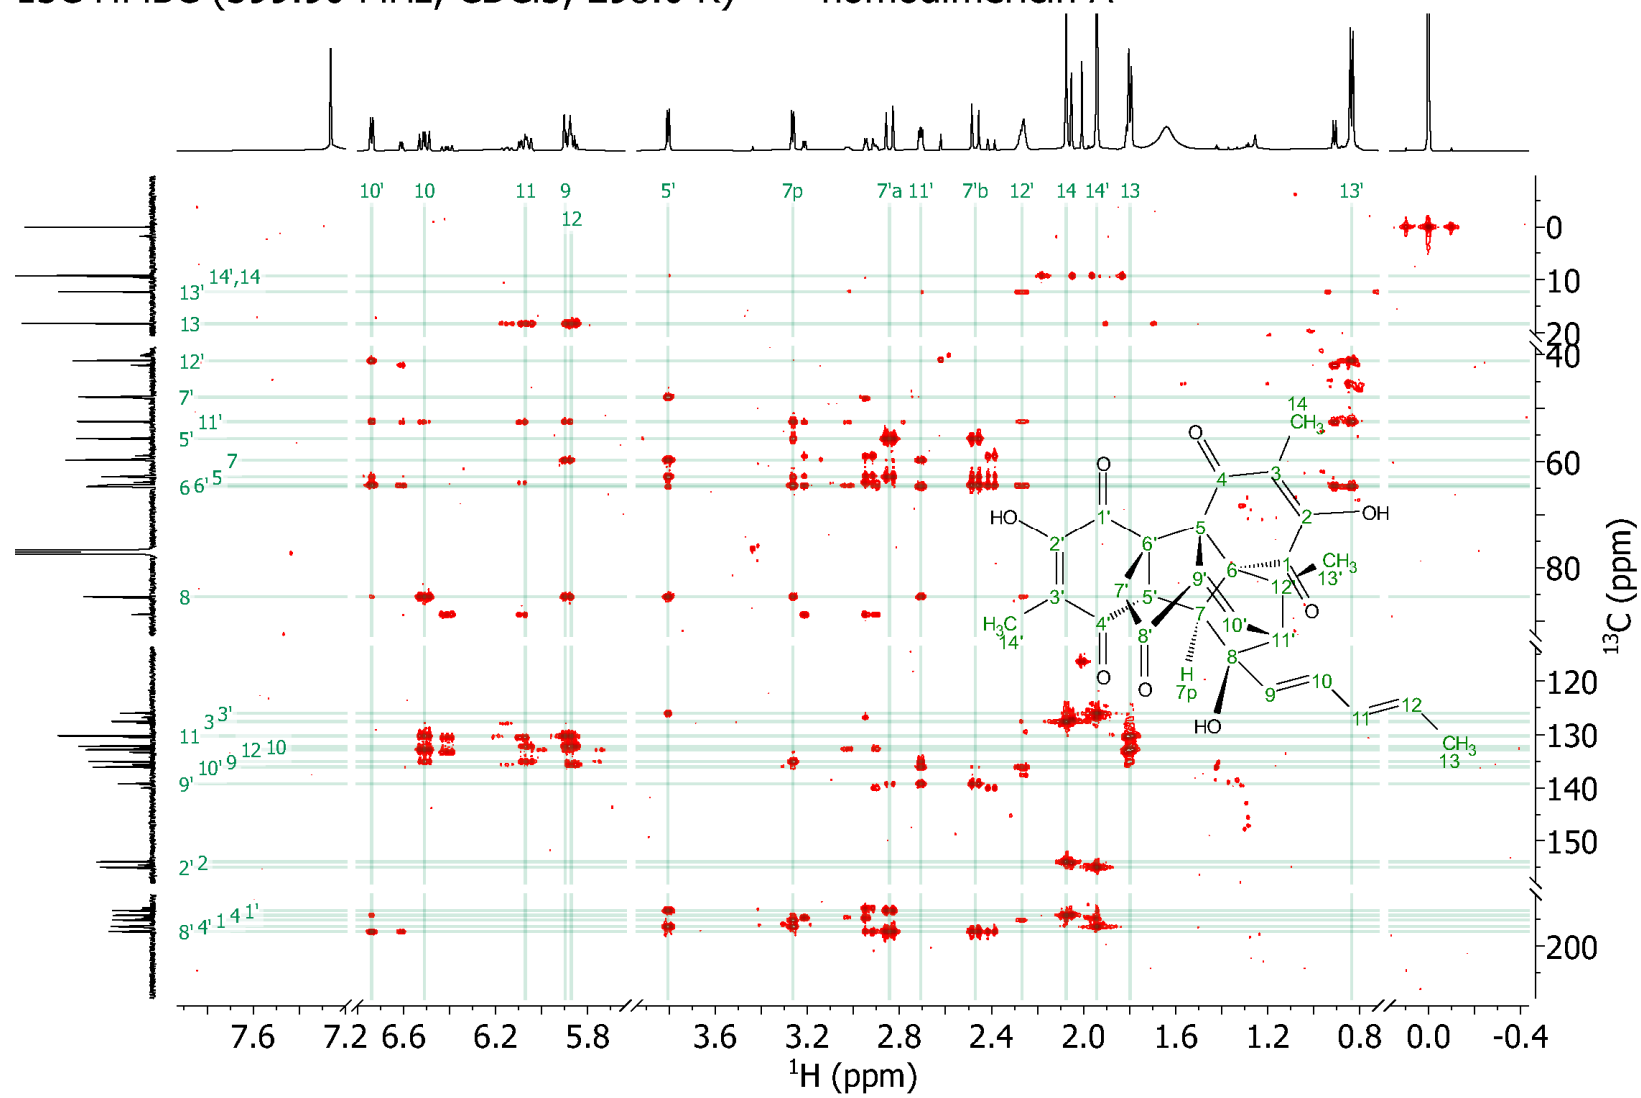



$^1\text{H}$  NOESY (599.90 MHz,  $\text{CDCl}_3$ , 298.0 K) — homodimericin A

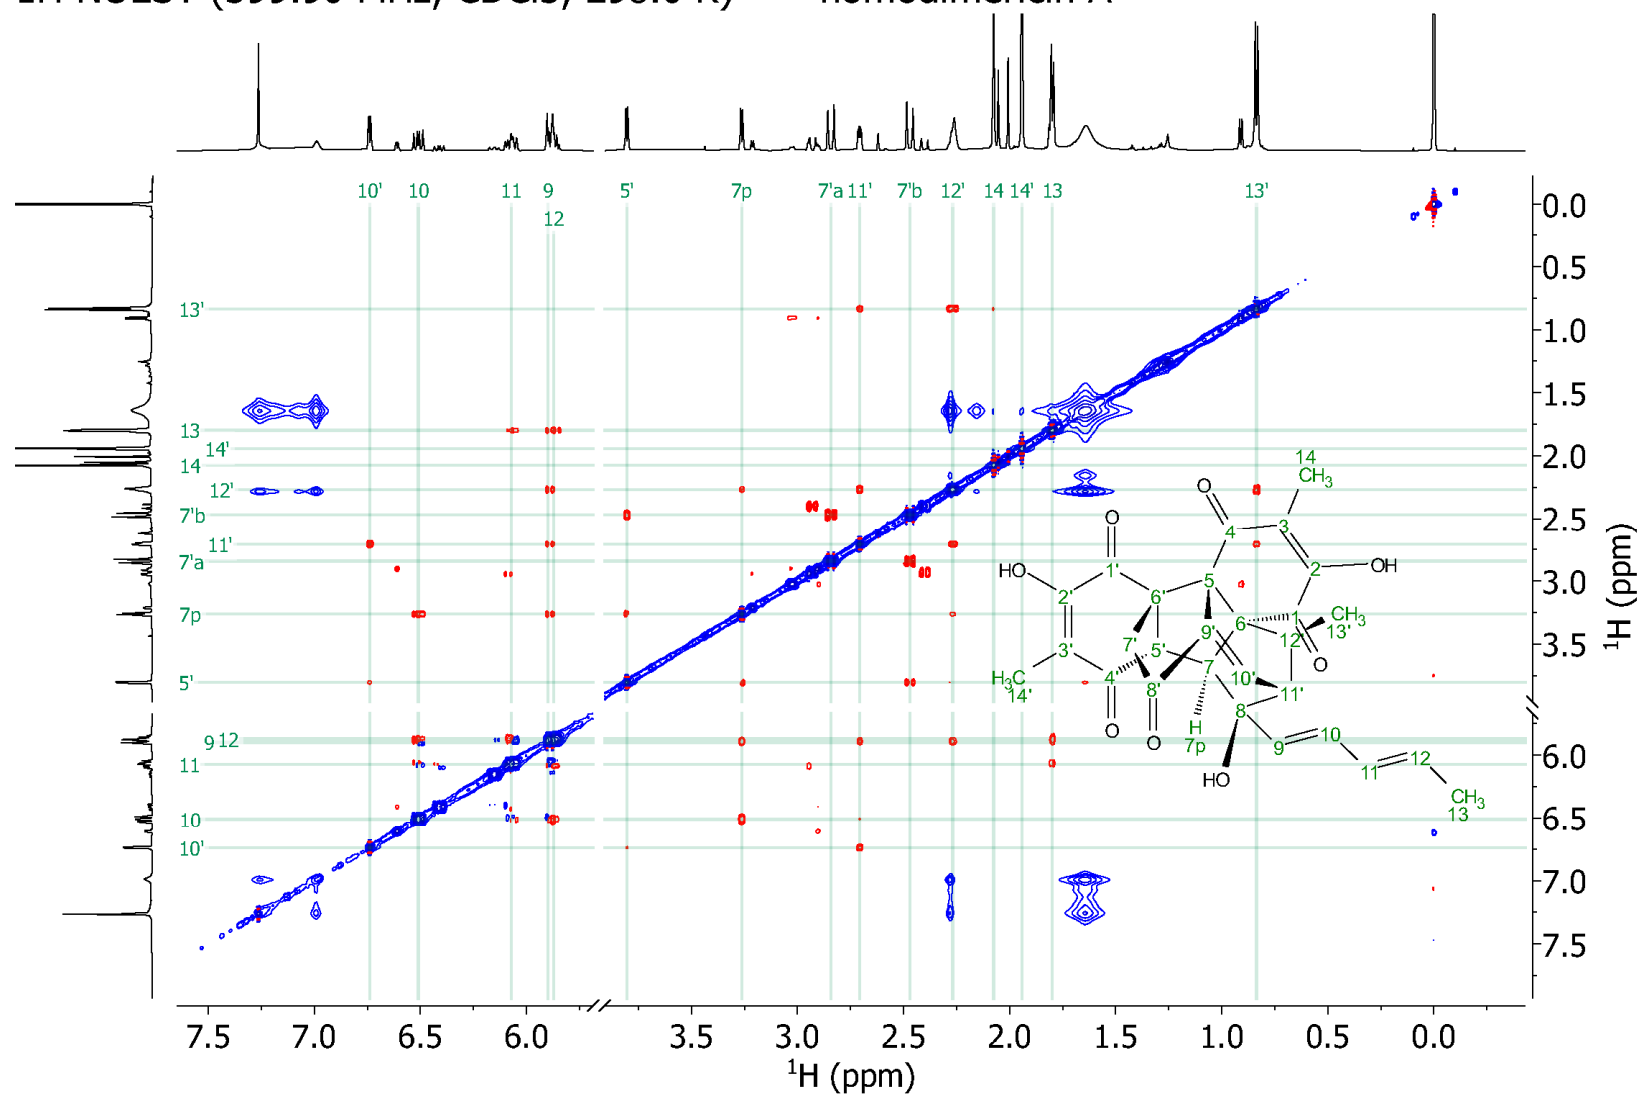

## V. Probe Set Geometries

The following molecular coordinates are for each compound of the probe set, which were optimized at the B3LYP-D3/6-311G(d,p) level using an implicit PCM solvent model for chloroform. Calculations were performed in Gaussian '16, Revision C.01 [1]. Structures represent global energy minima, and stationary points were verified by vibrational frequency calculations.

### Bicyclohexa2one - Method 1

| conf # | Boltzmann pop. (%) | Relative Energy (kcal/mol) |
|--------|--------------------|----------------------------|
| 1      | 100.0              | 0.0                        |

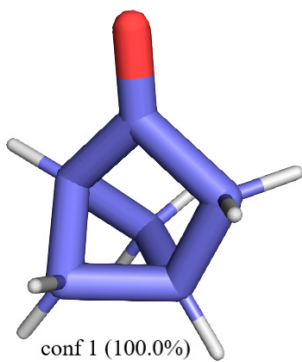

#### Cartesian Coordinates for Global Minimum of Bicyclohexa2one (Conf #1)

|   |           |           |           |
|---|-----------|-----------|-----------|
| C | -0.318380 | 1.299849  | -0.000070 |
| C | 1.127548  | 0.764006  | -0.000034 |
| C | -1.043502 | -0.066702 | -0.000233 |
| C | 0.120901  | -1.047451 | 0.000059  |
| C | 1.052129  | -0.370588 | -1.063031 |
| C | 1.052003  | -0.370386 | 1.063150  |
| O | -2.231852 | -0.289523 | 0.000070  |
| H | -0.578285 | 1.887596  | -0.888132 |
| H | -0.578360 | 1.887468  | 0.888058  |
| H | 1.937487  | 1.496334  | -0.000046 |
| H | -0.123740 | -2.109562 | 0.000153  |
| H | 1.996164  | -0.911667 | -1.176194 |
| H | 0.630787  | -0.137655 | -2.047581 |
| H | 1.996036  | -0.911423 | 1.176532  |
| H | 0.630539  | -0.137273 | 2.047606  |

## Bicyclohexa2one - Method 2

| conf # | Boltzmann pop. (%) | Relative Energy (kcal/mol) |
|--------|--------------------|----------------------------|
| 1      | 100.0              | 0.0                        |

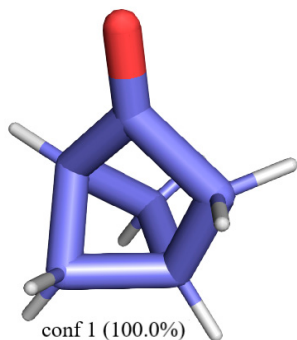

### Cartesian Coordinates for Global Minimum of Bicyclohexa2one (Conf #1)

|   |           |           |           |
|---|-----------|-----------|-----------|
| C | -0.318355 | 1.296505  | -0.000099 |
| C | 1.128187  | 0.763132  | -0.000047 |
| C | -1.039136 | -0.066160 | -0.000321 |
| C | 0.117497  | -1.046866 | 0.000082  |
| C | 1.050195  | -0.369697 | -1.064770 |
| C | 1.050018  | -0.369413 | 1.064936  |
| O | -2.225986 | -0.286767 | 0.000096  |
| H | -0.579225 | 1.878438  | -0.888077 |
| H | -0.579328 | 1.878261  | 0.887968  |
| H | 1.933912  | 1.494376  | -0.000065 |
| H | -0.131449 | -2.105104 | 0.000212  |
| H | 1.988766  | -0.914150 | -1.176330 |
| H | 0.628268  | -0.134706 | -2.045248 |
| H | 1.988584  | -0.913811 | 1.176803  |
| H | 0.627922  | -0.134171 | 2.045282  |

# Pinene - Method 1

| conf # | Boltzmann pop. (%) | Relative Energy (kcal/mol) |
|--------|--------------------|----------------------------|
| 1      | 100.0              | 0.0                        |

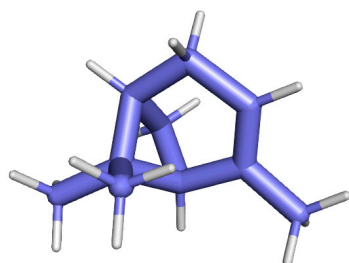

conf 1 (100.0%)

## Cartesian Coordinates for Global Minimum of Pinene (Conf #1)

|   |           |           |           |
|---|-----------|-----------|-----------|
| C | -1.088782 | -0.326133 | 0.205103  |
| C | 0.125896  | -0.641046 | -0.757287 |
| C | 1.445893  | -0.289108 | -0.082664 |
| C | 1.513627  | 0.909923  | 0.513768  |
| C | 0.298483  | 1.814657  | 0.532442  |
| C | -0.863559 | 1.165230  | -0.245279 |
| C | -0.310493 | 0.605690  | -1.586142 |
| C | 2.577452  | -1.275689 | -0.137881 |
| C | -2.413375 | -0.898965 | -0.325227 |
| C | -0.982739 | -0.679769 | 1.690708  |
| H | 0.148093  | -1.621371 | -1.246775 |
| H | 2.425319  | 1.248673  | 1.004164  |
| H | -0.002384 | 2.028409  | 1.569669  |
| H | 0.541260  | 2.791224  | 0.086090  |
| H | -1.743371 | 1.819695  | -0.276395 |
| H | -1.093983 | 0.392025  | -2.315950 |
| H | 0.490309  | 1.170582  | -2.073311 |
| H | 3.472517  | -0.895147 | 0.365474  |
| H | 2.297686  | -2.226360 | 0.337927  |
| H | 2.846371  | -1.516733 | -1.176123 |
| H | -3.260316 | -0.478333 | 0.232081  |
| H | -2.584449 | -0.694299 | -1.385758 |
| H | -2.440258 | -1.987739 | -0.190731 |
| H | -1.057144 | -1.766013 | 1.832241  |
| H | -0.044479 | -0.350123 | 2.141610  |
| H | -1.809588 | -0.223230 | 2.250539  |

## Pinene - Method 2

| conf # | Boltzmann pop. (%) | Relative Energy (kcal/mol) |
|--------|--------------------|----------------------------|
| 1      | 100.0              | 0.0                        |

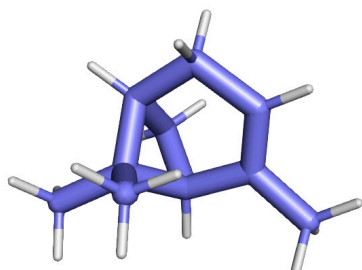

### Cartesian Coordinates for Global Minimum of Pinene (Conf #1)

|   |           |           |           |
|---|-----------|-----------|-----------|
| C | -1.083288 | -0.328562 | 0.205942  |
| C | 0.125393  | -0.632608 | -0.764348 |
| C | 1.443932  | -0.282117 | -0.091245 |
| C | 1.513788  | 0.909714  | 0.511319  |
| C | 0.296269  | 1.809738  | 0.542768  |
| C | -0.867621 | 1.165831  | -0.233101 |
| C | -0.317815 | 0.620301  | -1.582033 |
| C | 2.564178  | -1.277628 | -0.146836 |
| C | -2.406082 | -0.901176 | -0.323050 |
| C | -0.965449 | -0.692062 | 1.685542  |
| H | 0.147462  | -1.607335 | -1.257749 |
| H | 2.422723  | 1.242086  | 1.005312  |
| H | 0.000554  | 2.008057  | 1.581521  |
| H | 0.533123  | 2.788329  | 0.105397  |
| H | -1.749161 | 1.812823  | -0.252462 |
| H | -1.100951 | 0.409525  | -2.308547 |
| H | 0.478540  | 1.191107  | -2.063432 |
| H | 3.461413  | -0.909425 | 0.356158  |
| H | 2.265484  | -2.220520 | 0.327019  |
| H | 2.823206  | -1.519266 | -1.184563 |
| H | -3.247801 | -0.487294 | 0.241999  |
| H | -2.580423 | -0.687101 | -1.378332 |
| H | -2.423889 | -1.988624 | -0.197988 |
| H | -1.026792 | -1.777952 | 1.814396  |
| H | -0.030687 | -0.356677 | 2.133230  |
| H | -1.792629 | -0.246325 | 2.248298  |

### Aquatolide - Method 1

| conf # | Boltzmann pop. (%) | Relative Energy (kcal/mol) |
|--------|--------------------|----------------------------|
| 1      | 92.19              | 0.0                        |
| 2      | 7.76               | 1.47                       |
| 5      | 0.04               | 4.56                       |
| 6      | 0.01               | 5.64                       |

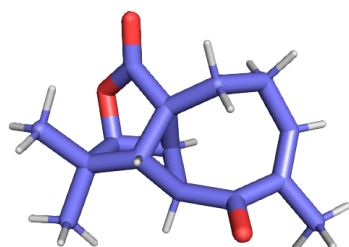

conf 1 (92.19%)

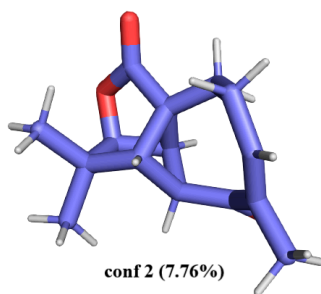

conf 2 (7.76%)

### Cartesian Coordinates for Global Minimum of Aquatolide (Conf #1)

|   |           |           |           |
|---|-----------|-----------|-----------|
| C | -1.648807 | 1.626917  | -0.088160 |
| C | -0.449185 | 0.773758  | 0.302870  |
| C | -0.139441 | -0.013785 | -1.013005 |
| C | -1.650807 | -0.307799 | -1.241585 |
| O | -2.278026 | 0.994801  | -1.123602 |
| O | -2.000191 | 2.696557  | 0.343167  |
| C | 0.429298  | -1.145577 | -0.141877 |
| C | -1.996527 | -1.148282 | 0.044211  |
| C | -0.723982 | -0.722525 | 0.822608  |
| C | -2.101474 | -2.654244 | -0.264393 |
| C | -3.293197 | -0.727415 | 0.759542  |
| C | 1.857080  | -1.021403 | 0.399476  |
| C | 2.866630  | -0.112743 | -0.259846 |
| O | 2.212234  | -1.797239 | 1.273110  |
| C | 4.099181  | -0.854082 | -0.733616 |
| C | 2.765168  | 1.222788  | -0.362890 |
| C | 1.719424  | 2.164718  | 0.178766  |
| C | 0.625635  | 1.552109  | 1.061421  |
| H | -1.958704 | -0.731308 | -2.197825 |
| H | 0.405297  | 0.435229  | -1.845864 |
| H | 0.378350  | -2.167669 | -0.529072 |
| H | -0.673125 | -0.945825 | 1.890767  |
| H | -1.356219 | -3.011522 | -0.980734 |
| H | -3.086409 | -2.873646 | -0.692656 |
| H | -1.997371 | -3.248484 | 0.650925  |

|   |           |           |           |
|---|-----------|-----------|-----------|
| H | -3.252498 | 0.279020  | 1.183355  |
| H | -3.488667 | -1.422817 | 1.584212  |
| H | -4.149625 | -0.765064 | 0.077937  |
| H | 3.852483  | -1.604750 | -1.496255 |
| H | 4.554349  | -1.391795 | 0.105285  |
| H | 4.836688  | -0.166109 | -1.157208 |
| H | 3.598883  | 1.733622  | -0.848225 |
| H | 2.251439  | 2.929911  | 0.762731  |
| H | 1.261093  | 2.720938  | -0.653744 |
| H | 1.090361  | 0.924778  | 1.830496  |
| H | 0.107560  | 2.357920  | 1.593344  |

## Aquatolide - Method 2

| conf # | Boltzmann pop. (%) | Relative Energy (kcal/mol) |
|--------|--------------------|----------------------------|
| 1      | 92.97              | 0.0                        |
| 2      | 6.95               | 1.54                       |
| 5      | 0.07               | 4.26                       |
| 6      | 0.01               | 5.46                       |

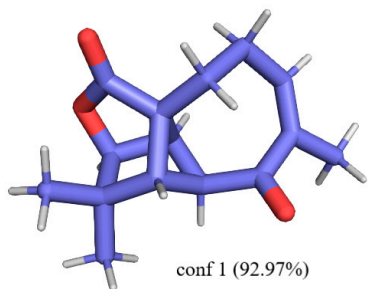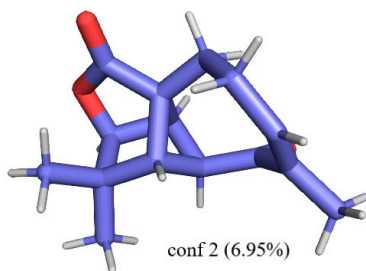

### Cartesian Coordinates for Global Minimum of Aquatolide (Conf #1)

|   |           |           |           |
|---|-----------|-----------|-----------|
| C | -1.638532 | 1.623277  | -0.090934 |
| C | -0.447947 | 0.771798  | 0.309468  |
| C | -0.129241 | -0.015174 | -1.005488 |
| C | -1.633852 | -0.313722 | -1.243563 |
| O | -2.261652 | 0.996217  | -1.123923 |
| O | -1.992902 | 2.692207  | 0.332068  |
| C | 0.432596  | -1.144633 | -0.129205 |
| C | -1.987140 | -1.149620 | 0.040011  |
| C | -0.726030 | -0.723646 | 0.827985  |
| C | -2.083763 | -2.652440 | -0.270226 |
| C | -3.283659 | -0.726851 | 0.747563  |
| C | 1.849787  | -1.007770 | 0.418936  |
| C | 2.850702  | -0.112910 | -0.264514 |
| O | 2.201745  | -1.751472 | 1.316010  |
| C | 4.057974  | -0.872875 | -0.766987 |
| C | 2.750038  | 1.217683  | -0.372454 |
| C | 1.710681  | 2.157631  | 0.179419  |
| C | 0.627067  | 1.542196  | 1.068977  |
| H | -1.936006 | -0.735065 | -2.198217 |
| H | 0.421835  | 0.434571  | -1.828472 |
| H | 0.396072  | -2.164580 | -0.514698 |
| H | -0.685329 | -0.942319 | 1.893674  |
| H | -1.330725 | -3.000883 | -0.978122 |
| H | -3.061053 | -2.871441 | -0.708434 |
| H | -1.984968 | -3.240719 | 0.646088  |
| H | -3.238941 | 0.278374  | 1.167926  |



|   |           |           |           |
|---|-----------|-----------|-----------|
| H | -3.478748 | -1.418157 | 1.571536  |
| H | -4.133387 | -0.764543 | 0.062035  |
| H | 3.771754  | -1.627130 | -1.508027 |
| H | 4.532201  | -1.403193 | 0.063070  |
| H | 4.787296  | -0.201246 | -1.222417 |
| H | 3.570370  | 1.725693  | -0.877195 |
| H | 2.245630  | 2.923290  | 0.753910  |
| H | 1.244957  | 2.705146  | -0.651129 |
| H | 1.094044  | 0.909311  | 1.827735  |
| H | 0.115380  | 2.339609  | 1.613563  |

## Naupliolide - Method 1

| conf # | Boltzmann pop. (%) | Relative Energy (kcal/mol) |
|--------|--------------------|----------------------------|
| 2      | 73.58              | 0.0                        |
| 4      | 24.52              | 0.65                       |
| 1      | 1.9                | 2.17                       |

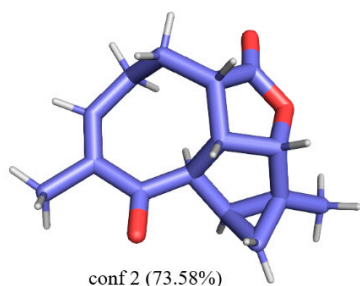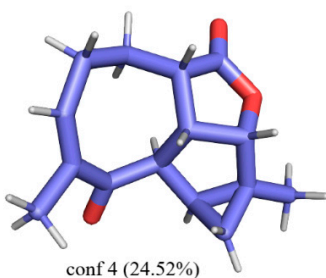

### Cartesian Coordinates for Global Minimum of Naupliolide (Conf #2)

|   |           |           |           |
|---|-----------|-----------|-----------|
| C | 0.270329  | 1.613592  | 0.944678  |
| C | 1.376678  | 2.082524  | -0.004914 |
| O | 2.342697  | 1.126389  | -0.079236 |
| C | 1.980338  | -0.044347 | 0.709061  |
| C | 0.451010  | 0.090314  | 0.920075  |
| C | 2.225819  | -1.305230 | -0.092790 |
| C | 0.877591  | -1.730271 | -0.650525 |
| C | -0.165292 | -0.676687 | -0.293694 |
| O | 1.445530  | 3.124943  | -0.605380 |
| C | -1.081681 | 2.288931  | 0.680812  |
| C | -1.816166 | 1.953424  | -0.643950 |
| C | -2.859055 | 0.855684  | -0.564620 |
| C | -2.789837 | -0.461110 | -0.271167 |
| C | -1.548949 | -1.239391 | 0.031944  |
| C | -4.055358 | -1.285174 | -0.169400 |
| O | -1.650661 | -2.350600 | 0.536441  |
| C | 1.514709  | -2.519304 | 0.463414  |
| C | 3.533368  | -1.446098 | -0.840125 |
| H | 0.807427  | -2.190935 | -1.632702 |
| H | -0.246471 | 0.001043  | -1.148236 |
| H | 0.133876  | -0.377235 | 1.856114  |
| H | 2.555766  | 0.003296  | 1.642524  |
| H | 0.597452  | 1.955685  | 1.940442  |
| H | -1.752796 | 2.093055  | 1.524916  |
| H | -0.875228 | 3.364691  | 0.683841  |
| H | -2.343878 | 2.859335  | -0.957945 |
| H | -1.083489 | 1.770114  | -1.439338 |

|   |           |           |           |
|---|-----------|-----------|-----------|
| H | -3.871424 | 1.224510  | -0.733690 |
| H | -4.173108 | -1.692208 | 0.840464  |
| H | -4.937719 | -0.686919 | -0.414328 |
| H | -4.018361 | -2.148746 | -0.843348 |
| H | 1.936690  | -3.484195 | 0.195634  |
| H | 1.070160  | -2.500636 | 1.453765  |
| H | 3.541747  | -2.366518 | -1.434029 |
| H | 3.695150  | -0.599762 | -1.515139 |
| H | 4.382663  | -1.491572 | -0.146345 |

## Naupliolide - Method 2

| conf # | Boltzmann pop. (%) | Relative Energy (kcal/mol) |
|--------|--------------------|----------------------------|
| 3      | 50.19              | 0.0                        |
| 2      | 38.59              | 0.16                       |
| 4      | 9.37               | 0.99                       |
| 1      | 1.85               | 1.95                       |

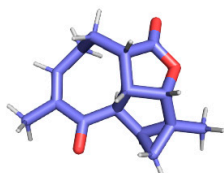

conf 2 (38.59%)

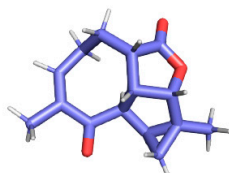

conf 3 (50.19%)

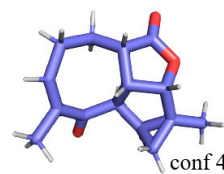

conf 4 (9.37%)

## Cartesian Coordinates for Global Minimum of Naupliolide (Conf #3)

|   |           |           |           |
|---|-----------|-----------|-----------|
| C | 0.234229  | 1.682951  | 0.806163  |
| C | 1.434076  | 2.060176  | -0.057316 |
| O | 2.361399  | 1.079480  | 0.015578  |
| C | 1.866095  | -0.044824 | 0.814126  |
| C | 0.328612  | 0.145480  | 0.825511  |
| C | 2.182225  | -1.326313 | 0.087339  |
| C | 0.924509  | -1.715589 | -0.654645 |
| C | -0.146554 | -0.657844 | -0.434401 |
| O | 1.604266  | 3.060830  | -0.701895 |
| C | -1.035749 | 2.460504  | 0.456174  |
| C | -1.873538 | 1.919321  | -0.722312 |
| C | -2.869801 | 0.884235  | -0.271753 |
| C | -2.760151 | -0.440044 | -0.066942 |
| C | -1.542979 | -1.271009 | -0.309604 |
| C | -3.955989 | -1.244274 | 0.392343  |
| O | -1.669277 | -2.483341 | -0.381924 |
| C | 1.363942  | -2.507831 | 0.551245  |
| C | 3.575231  | -1.518553 | -0.461270 |
| H | 0.978014  | -2.188103 | -1.627173 |
| H | -0.146400 | 0.001877  | -1.306313 |
| H | -0.114718 | -0.268954 | 1.730881  |
| H | 2.323466  | 0.035434  | 1.804448  |
| H | 0.534450  | 2.009691  | 1.812481  |

|   |           |           |           |
|---|-----------|-----------|-----------|
| H | -1.673955 | 2.526288  | 1.341135  |
| H | -0.712222 | 3.478591  | 0.224169  |
| H | -2.437297 | 2.753319  | -1.146083 |
| H | -1.222191 | 1.562976  | -1.521638 |
| H | -3.847431 | 1.307831  | -0.048432 |
| H | -4.818387 | -0.600894 | 0.572495  |
| H | -4.223446 | -1.994454 | -0.355546 |
| H | -3.727575 | -1.792103 | 1.311145  |
| H | 1.790191  | -3.485838 | 0.363305  |
| H | 0.783969  | -2.449289 | 1.465307  |
| H | 4.311266  | -1.566053 | 0.347853  |
| H | 3.637801  | -2.450713 | -1.027467 |
| H | 3.848414  | -0.693682 | -1.122590 |

## Echinopine B - Method 1

| conf # | Boltzmann pop. (%) | Relative Energy (kcal/mol) |
|--------|--------------------|----------------------------|
| 1      | 38.62              | 0.0                        |
| 2      | 35.65              | 0.05                       |
| 3      | 23.18              | 0.3                        |
| 6      | 0.88               | 2.24                       |
| 7      | 0.8                | 2.3                        |
| 9      | 0.45               | 2.63                       |
| 8      | 0.27               | 2.94                       |
| 13     | 0.1                | 3.51                       |
| 11     | 0.03               | 4.15                       |
| 10     | 0.0                | 6.02                       |
| 15     | 0.0                | 7.04                       |
| 19     | 0.0                | 7.87                       |
| 16     | 0.0                | 9.86                       |
| 17     | 0.0                | 10.2                       |
| 18     | 0.0                | 10.36                      |

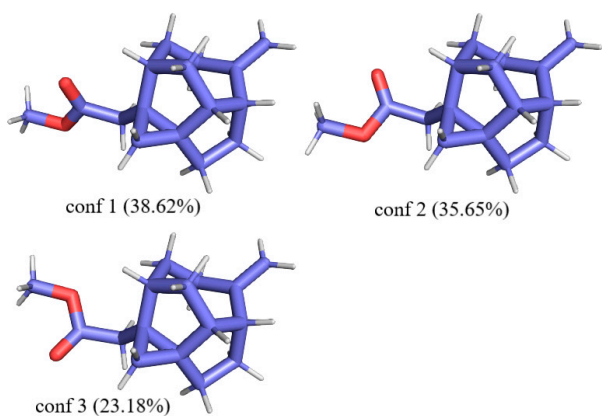

## Cartesian Coordinates for Global Minimum of Echinopine B (Conf #1)

|   |           |           |           |
|---|-----------|-----------|-----------|
| C | 2.803180  | -0.466029 | -0.206331 |
| C | 2.731673  | 1.009220  | -0.569093 |
| C | 1.388993  | 1.610123  | -0.946667 |
| C | 0.441196  | 1.940264  | 0.232806  |
| C | 1.896831  | -0.879642 | 1.000736  |
| C | 0.658454  | -1.474654 | 0.337074  |
| C | -0.469169 | -0.448464 | 0.461559  |
| C | -1.519200 | -0.271423 | -0.618504 |
| C | -2.867357 | 0.190517  | -0.088998 |
| O | -3.844109 | -0.064174 | -0.992536 |
| C | -5.157896 | 0.382761  | -0.620335 |

|   |           |           |           |
|---|-----------|-----------|-----------|
| O | -3.072789 | 0.739602  | 0.971636  |
| C | 3.838686  | 1.761855  | -0.574789 |
| H | 3.846862  | -0.676374 | 0.049427  |
| C | 0.098142  | 0.782030  | 1.193697  |
| H | -0.624990 | 1.164189  | 1.922329  |
| C | 2.357562  | -1.405963 | -1.385791 |
| C | 1.107194  | -2.203343 | -0.912949 |
| H | 2.433212  | -1.637730 | 1.587892  |
| C | 1.368458  | 0.248163  | 1.905835  |
| C | -0.517429 | -1.765161 | 1.222613  |
| H | 0.875942  | 0.934414  | -1.643322 |
| H | 1.562918  | 2.539699  | -1.501939 |
| H | 0.894839  | 2.744660  | 0.826298  |
| H | -0.485622 | 2.358868  | -0.182031 |
| H | -1.212237 | 0.464040  | -1.374190 |
| H | -1.676736 | -1.205456 | -1.169053 |
| H | -5.806710 | 0.111618  | -1.453878 |
| H | -5.486344 | -0.110980 | 0.298214  |
| H | -5.167028 | 1.464666  | -0.462200 |
| H | 3.815406  | 2.812841  | -0.854939 |
| H | 4.810483  | 1.356822  | -0.301730 |
| H | 3.172928  | -2.080261 | -1.666665 |
| H | 2.129453  | -0.815262 | -2.278983 |
| H | 0.332067  | -2.259999 | -1.686179 |
| H | 1.380484  | -3.237770 | -0.665587 |
| H | 1.108994  | -0.159454 | 2.889410  |
| H | 2.108879  | 1.036520  | 2.077450  |
| H | -1.249109 | -2.489716 | 0.869470  |
| H | -0.384413 | -1.780283 | 2.302223  |

## Echinopine B - Method 2

| conf # | Boltzmann pop. (%) | Relative Energy (kcal/mol) |
|--------|--------------------|----------------------------|
| 2      | 41.01              | 0.0                        |
| 1      | 32.55              | 0.14                       |
| 3      | 25.0               | 0.29                       |
| 7      | 0.51               | 2.59                       |
| 6      | 0.46               | 2.66                       |
| 9      | 0.17               | 3.25                       |
| 8      | 0.13               | 3.39                       |
| 12     | 0.08               | 3.7                        |
| 11     | 0.06               | 3.84                       |
| 13     | 0.02               | 4.54                       |
| 10     | 0.0                | 6.92                       |
| 14     | 0.0                | 8.14                       |
| 19     | 0.0                | 8.68                       |
| 15     | 0.0                | 8.84                       |
| 16     | 0.0                | 9.83                       |
| 18     | 0.0                | 10.01                      |
| 17     | 0.0                | 10.11                      |

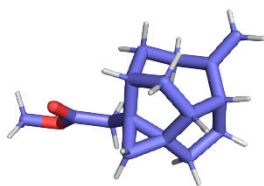

conf 1 (32.55%)

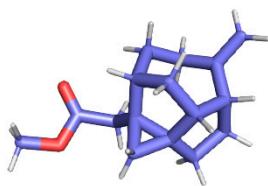

conf 2 (41.01%)

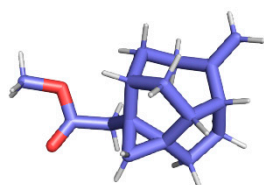

conf 3 (25.00%)

### Cartesian Coordinates for Global Minimum of Echinopine B (Conf #2)

|   |           |           |           |
|---|-----------|-----------|-----------|
| C | 2.752463  | -0.602629 | 0.041555  |
| C | 2.822171  | 0.867783  | -0.330104 |
| C | 1.585615  | 1.531743  | -0.904563 |
| C | 0.523703  | 1.961402  | 0.133591  |
| C | 1.654688  | -0.942992 | 1.098902  |
| C | 0.488731  | -1.449303 | 0.260705  |
| C | -0.561668 | -0.347696 | 0.226730  |
| C | -1.435152 | -0.086401 | -0.993462 |
| C | -2.760472 | 0.487714  | -0.548896 |



|   |           |           |           |
|---|-----------|-----------|-----------|
| O | -3.669405 | -0.479488 | -0.319870 |
| C | -4.941509 | -0.040400 | 0.202755  |
| O | -2.981646 | 1.663779  | -0.367136 |
| C | 3.952334  | 1.559471  | -0.162115 |
| H | 3.728313  | -0.874487 | 0.449169  |
| C | -0.027619 | 0.841877  | 1.038131  |
| H | -0.815571 | 1.279033  | 1.660470  |
| C | 2.425282  | -1.524078 | -1.187264 |
| C | 1.049820  | -2.202032 | -0.922409 |
| H | 2.040480  | -1.734725 | 1.750372  |
| C | 1.085283  | 0.223808  | 1.923996  |
| C | -0.820202 | -1.654061 | 0.962697  |
| H | 1.126204  | 0.857948  | -1.633672 |
| H | 1.888005  | 2.422769  | -1.461731 |
| H | 0.958962  | 2.733067  | 0.776904  |
| H | -0.308701 | 2.433771  | -0.396656 |
| H | -0.977767 | 0.630321  | -1.675180 |
| H | -1.606246 | -1.017912 | -1.534545 |
| H | -5.533662 | -0.943949 | 0.325702  |
| H | -4.804234 | 0.462281  | 1.161362  |
| H | -5.424774 | 0.643746  | -0.496180 |
| H | 4.025475  | 2.605781  | -0.442761 |
| H | 4.842051  | 1.103130  | 0.260116  |
| H | 3.210922  | -2.270820 | -1.317239 |
| H | 2.401746  | -0.938285 | -2.108431 |
| H | 0.394951  | -2.170737 | -1.796733 |
| H | 1.183145  | -3.257098 | -0.661695 |
| H | 0.660498  | -0.157214 | 2.855597  |
| H | 1.846543  | 0.957952  | 2.195858  |
| H | -1.544777 | -2.312231 | 0.496545  |
| H | -0.843964 | -1.671918 | 2.047277  |

# **Parthenolide - Method 1**

| conf # | Boltzmann pop. (%) | Relative Energy (kcal/mol) |
|--------|--------------------|----------------------------|
| 1      | 99.15              | 0.0                        |
| 2      | 0.85               | 2.82                       |
| 6      | 0.0                | 7.49                       |
| 3      | 0.0                | 8.11                       |

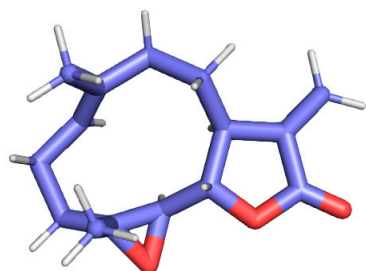

conf 1 (99.15%)

## Cartesian Coordinates for Global Minimum of Parthenolide (Conf #1)

|   |           |           |           |
|---|-----------|-----------|-----------|
| C | -3.389830 | -0.146276 | -0.824001 |
| C | -2.754241 | -1.566775 | -0.794932 |
| C | -1.557923 | -1.644218 | 0.145042  |
| C | -0.239154 | -1.300769 | -0.432921 |
| C | -1.874066 | 1.803384  | -0.121152 |
| C | -2.326697 | 0.904374  | -1.009684 |
| C | 0.896641  | -0.632188 | 0.307078  |
| C | 1.303410  | 0.759970  | -0.276250 |
| C | 0.653885  | 2.024815  | 0.336518  |
| C | -0.599850 | 2.576348  | -0.396105 |
| C | -2.527407 | 2.119155  | 1.204095  |
| O | -0.577075 | -2.661067 | -0.143064 |
| C | -1.866119 | -1.512825 | 1.623284  |
| O | 2.070733  | -1.476818 | 0.174722  |
| C | 3.202363  | -0.735845 | 0.012529  |
| C | 2.812524  | 0.696439  | -0.154410 |
| O | 4.306068  | -1.222203 | 0.009371  |
| C | 3.734293  | 1.658530  | -0.196258 |
| H | -4.117620 | -0.114174 | -1.645972 |
| H | -3.957186 | 0.021396  | 0.096651  |
| H | -2.417735 | -1.844140 | -1.800777 |
| H | -3.513758 | -2.302937 | -0.500846 |
| H | -0.211309 | -1.100131 | -1.506809 |
| H | -1.784458 | 0.826757  | -1.954424 |
| H | 0.688243  | -0.550508 | 1.378848  |

|   |           |           |           |
|---|-----------|-----------|-----------|
| H | 1.066811  | 0.741330  | -1.352090 |
| H | 0.430566  | 1.849894  | 1.397032  |
| H | 1.405463  | 2.821910  | 0.325269  |
| H | -0.393500 | 2.596202  | -1.474052 |
| H | -0.729020 | 3.622226  | -0.084039 |
| H | -3.429559 | 1.533385  | 1.394134  |
| H | -1.840713 | 1.963031  | 2.046808  |
| H | -2.812196 | 3.180138  | 1.233533  |
| H | -2.305147 | -0.541885 | 1.868846  |
| H | -2.586849 | -2.288760 | 1.908755  |
| H | -0.970572 | -1.660525 | 2.230904  |
| H | 3.489764  | 2.709718  | -0.319195 |
| H | 4.783984  | 1.393079  | -0.107804 |

## Parthenolide - Method 2

| conf # | Boltzmann pop. (%) | Relative Energy (kcal/mol) |
|--------|--------------------|----------------------------|
| 1      | 99.29              | 0.0                        |
| 2      | 0.66               | 2.97                       |
| 4      | 0.04               | 4.61                       |
| 6      | 0.0                | 7.07                       |
| 3      | 0.0                | 7.47                       |

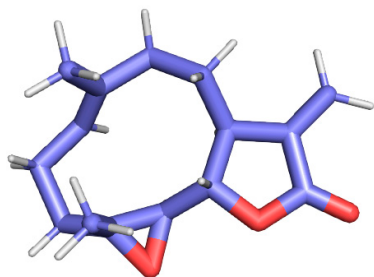

conf 1 (99.29%)

### Cartesian Coordinates for Global Minimum of Parthenolide (Conf #1)

|   |           |           |           |
|---|-----------|-----------|-----------|
| C | -3.397539 | -0.121540 | -0.796582 |
| C | -2.772984 | -1.544538 | -0.789082 |
| C | -1.570334 | -1.622001 | 0.134627  |
| C | -0.262190 | -1.269333 | -0.449619 |
| C | -1.842944 | 1.790680  | -0.109902 |
| C | -2.328504 | 0.917132  | -0.999875 |
| C | 0.868454  | -0.607798 | 0.295565  |
| C | 1.309819  | 0.764078  | -0.294705 |
| C | 0.680706  | 2.038058  | 0.309416  |
| C | -0.583295 | 2.572868  | -0.408934 |
| C | -2.443440 | 2.073222  | 1.245490  |
| O | -0.588644 | -2.638762 | -0.165928 |
| C | -1.861080 | -1.483513 | 1.611265  |
| O | 2.036217  | -1.479945 | 0.184795  |
| C | 3.172991  | -0.762256 | 0.021665  |
| C | 2.813206  | 0.672064  | -0.159259 |
| O | 4.263521  | -1.273388 | 0.029137  |
| C | 3.747629  | 1.616973  | -0.200911 |
| H | -4.138350 | -0.077982 | -1.601761 |
| H | -3.940827 | 0.043292  | 0.135526  |
| H | -2.449766 | -1.814655 | -1.798378 |
| H | -3.525908 | -2.278136 | -0.483652 |
| H | -0.240570 | -1.059700 | -1.518082 |
| H | -1.815573 | 0.848207  | -1.958530 |
| H | 0.657332  | -0.513509 | 1.361845  |

|   |           |           |           |
|---|-----------|-----------|-----------|
| H | 1.088041  | 0.744667  | -1.369907 |
| H | 0.480932  | 1.878322  | 1.373400  |
| H | 1.429599  | 2.832030  | 0.266894  |
| H | -0.392077 | 2.587249  | -1.486723 |
| H | -0.720833 | 3.615467  | -0.099795 |
| H | -3.359170 | 1.515756  | 1.439582  |
| H | -1.736125 | 1.853745  | 2.052497  |
| H | -2.681766 | 3.139831  | 1.324622  |
| H | -2.262888 | -0.500087 | 1.851306  |
| H | -2.603795 | -2.233037 | 1.899245  |
| H | -0.965884 | -1.655514 | 2.207566  |
| H | 3.514828  | 2.666836  | -0.331282 |
| H | 4.791075  | 1.339405  | -0.103361 |

## Diepoxyguainaolide - Method 1

| conf # | Boltzmann pop. (%) | Relative Energy (kcal/mol) |
|--------|--------------------|----------------------------|
| 1      | 96.76              | 0.0                        |
| 2      | 1.96               | 2.31                       |
| 4      | 1.13               | 2.63                       |
| 5      | 0.15               | 3.84                       |

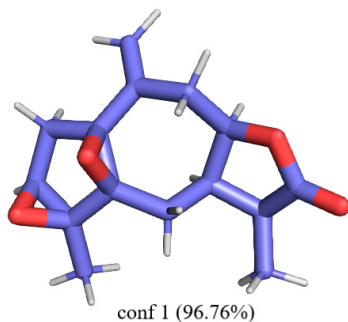

## Cartesian Coordinates for Global Minimum of Diepoxyguainaolide (Conf #1)

|   |           |           |           |
|---|-----------|-----------|-----------|
| C | 0.322545  | -0.852526 | 0.483241  |
| C | 1.196406  | -0.233004 | -0.625799 |
| C | 1.596109  | 1.239107  | -0.348551 |
| C | 0.626891  | 2.105255  | 0.458295  |
| C | -0.752549 | 2.141513  | -0.160535 |
| C | -1.635765 | 0.969816  | 0.124409  |
| C | -1.136735 | -0.410349 | 0.449621  |
| C | -3.040972 | 0.867368  | -0.477267 |
| C | -3.379357 | -0.615924 | -0.477616 |
| C | -2.244765 | -1.406636 | 0.036397  |
| C | 2.598928  | -0.873365 | -0.773120 |
| C | 3.454567  | -0.037369 | 0.177220  |
| O | 2.842292  | 1.160842  | 0.391391  |
| C | -1.152228 | 3.171881  | -0.916106 |
| O | -3.445031 | -1.240124 | 0.810145  |
| O | -1.573644 | 0.476575  | 1.483036  |
| O | 4.508113  | -0.328530 | 0.681812  |
| C | 2.775434  | -2.375420 | -0.559432 |
| H | 0.647082  | -0.290949 | -1.572212 |
| C | -1.927020 | -2.815830 | -0.392666 |
| H | 0.358268  | -1.941004 | 0.390052  |
| H | 0.732153  | -0.620565 | 1.473058  |
| H | 1.813268  | 1.737161  | -1.303381 |
| H | 1.040569  | 3.116320  | 0.519492  |

|   |           |           |           |
|---|-----------|-----------|-----------|
| H | 0.565005  | 1.716895  | 1.479049  |
| H | -3.039958 | 1.230933  | -1.510829 |
| H | -3.764956 | 1.460058  | 0.092382  |
| H | -4.081360 | -1.006274 | -1.214940 |
| H | 2.962260  | -0.623697 | -1.782708 |
| H | -2.138130 | 3.225219  | -1.366250 |
| H | -0.495906 | 4.018496  | -1.098524 |
| H | 3.826939  | -2.641396 | -0.699851 |
| H | 2.174219  | -2.950707 | -1.272060 |
| H | 2.498279  | -2.679373 | 0.454334  |
| H | -1.208143 | -2.835818 | -1.220174 |
| H | -1.508838 | -3.399487 | 0.435840  |
| H | -2.843516 | -3.313014 | -0.722892 |

## Diepoxylguainaolide - Method 2

| conf # | Boltzmann pop. (%) | Relative Energy (kcal/mol) |
|--------|--------------------|----------------------------|
| 1      | 93.47              | 0.0                        |
| 2      | 4.95               | 1.74                       |
| 4      | 1.03               | 2.67                       |
| 5      | 0.28               | 3.44                       |
| 3      | 0.26               | 3.48                       |
| 6      | 0.0                | 6.92                       |

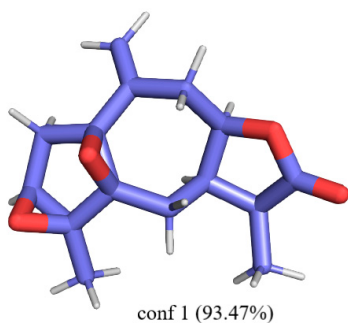

## Cartesian Coordinates for Global Minimum of Diepoxylguainaolide (Conf #1)

|   |           |           |           |
|---|-----------|-----------|-----------|
| C | 0.327409  | -0.828526 | 0.520813  |
| C | 1.176756  | -0.231324 | -0.614122 |
| C | 1.576106  | 1.240645  | -0.359867 |
| C | 0.622031  | 2.107827  | 0.455362  |
| C | -0.759051 | 2.141290  | -0.154766 |
| C | -1.635805 | 0.967837  | 0.130424  |
| C | -1.130691 | -0.400468 | 0.473896  |
| C | -3.024782 | 0.845508  | -0.495329 |
| C | -3.344251 | -0.638312 | -0.500720 |
| C | -2.213491 | -1.409463 | 0.039054  |
| C | 2.573736  | -0.872845 | -0.770038 |
| C | 3.435218  | -0.034384 | 0.163077  |
| O | 2.835467  | 1.162253  | 0.374505  |
| C | -1.163800 | 3.168078  | -0.906917 |
| O | -3.432631 | -1.265751 | 0.790324  |
| O | -1.590207 | 0.487002  | 1.498421  |
| O | 4.489250  | -0.321267 | 0.664876  |
| C | 2.737270  | -2.373122 | -0.551293 |
| H | 0.614969  | -0.304470 | -1.547911 |
| C | -1.855988 | -2.804702 | -0.390509 |
| H | 0.373038  | -1.915048 | 0.466334  |
| H | 0.739373  | -0.558815 | 1.496372  |



|   |           |           |           |
|---|-----------|-----------|-----------|
| H | 1.790027  | 1.730206  | -1.315615 |
| H | 1.035701  | 3.115685  | 0.512568  |
| H | 0.567283  | 1.717447  | 1.472998  |
| H | -3.003900 | 1.199601  | -1.528527 |
| H | -3.763439 | 1.433090  | 0.054795  |
| H | -4.017891 | -1.041121 | -1.252200 |
| H | 2.929902  | -0.624916 | -1.779251 |
| H | -2.149546 | 3.215554  | -1.351952 |
| H | -0.507615 | 4.011145  | -1.092202 |
| H | 3.773705  | -2.660055 | -0.736058 |
| H | 2.095076  | -2.937280 | -1.231505 |
| H | 2.495985  | -2.660480 | 0.473711  |
| H | -1.112741 | -2.792398 | -1.192149 |
| H | -1.449397 | -3.380708 | 0.445500  |
| H | -2.749565 | -3.313566 | -0.754300 |

# **Cannabicitran - Method 1**

| conf # | Boltzmann pop. (%) | Relative Energy (kcal/mol) |
|--------|--------------------|----------------------------|
| 1      | 99.91              | 0.0                        |
| 2      | 0.09               | 4.18                       |

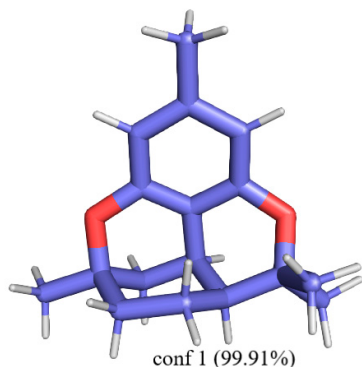

## Cartesian Coordinates for Global Minimum of Cannabicitran (Conf #1)

|   |           |           |           |
|---|-----------|-----------|-----------|
| C | -2.234511 | -0.173869 | 1.317680  |
| C | -0.928085 | -1.004722 | 1.442063  |
| C | -0.533858 | -1.757529 | 0.143344  |
| C | -0.741368 | -0.793828 | -1.046770 |
| C | -2.173546 | -0.279318 | -1.180742 |
| C | -2.457156 | 0.637899  | 0.011489  |
| C | 0.189331  | 0.338061  | -0.735050 |
| C | 1.528382  | -0.000487 | -0.539353 |
| C | 2.474250  | 0.965880  | -0.204031 |
| C | 2.042599  | 2.282828  | 0.034503  |
| C | 0.672378  | 2.576266  | 0.037465  |
| C | -0.255166 | 1.578535  | -0.285488 |
| C | 0.947746  | -2.284686 | 0.056404  |
| O | 1.848386  | -1.331516 | -0.637562 |
| C | 1.586231  | -2.567177 | 1.420277  |
| C | 1.002643  | -3.536971 | -0.822616 |
| C | -3.863617 | 1.229713  | -0.020720 |
| O | -1.590319 | 1.811445  | -0.078616 |
| C | 3.051633  | 3.365315  | 0.343863  |
| H | -3.092470 | -0.856976 | 1.387992  |
| H | -2.310031 | 0.506222  | 2.174746  |
| H | -0.116848 | -0.337871 | 1.744335  |
| H | -1.056883 | -1.718711 | 2.264839  |
| H | -1.189896 | -2.633395 | 0.033562  |
| H | -0.429935 | -1.287594 | -1.975882 |
| H | -2.294634 | 0.283488  | -2.114231 |

|   |           |           |           |
|---|-----------|-----------|-----------|
| H | -2.890370 | -1.110269 | -1.198087 |
| H | 3.517141  | 0.686719  | -0.087427 |
| H | 0.313036  | 3.554757  | 0.342365  |
| H | 2.586068  | -2.989326 | 1.278023  |
| H | 0.988080  | -3.284182 | 1.994573  |
| H | 1.687831  | -1.652711 | 2.011224  |
| H | 0.504018  | -4.376537 | -0.325790 |
| H | 0.514861  | -3.366179 | -1.787802 |
| H | 2.044082  | -3.813647 | -1.013357 |
| H | -4.006712 | 1.811095  | -0.937085 |
| H | -4.619277 | 0.437942  | 0.012397  |
| H | -4.019258 | 1.896124  | 0.834334  |
| H | 3.917227  | 2.964906  | 0.883153  |
| H | 3.430317  | 3.827795  | -0.577634 |
| H | 2.611796  | 4.163449  | 0.951269  |

## Cannabicitran - Method 2

| conf # | Boltzmann pop. (%) | Relative Energy (kcal/mol) |
|--------|--------------------|----------------------------|
| 1      | 99.93              | 0.0                        |
| 2      | 0.07               | 4.28                       |

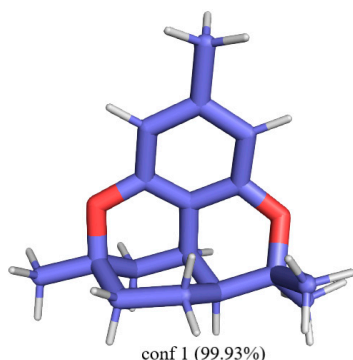

### Cartesian Coordinates for Global Minimum of Cannabicitran (Conf #1)

|   |           |           |           |
|---|-----------|-----------|-----------|
| C | -2.224005 | -0.133200 | 1.325727  |
| C | -0.918327 | -0.958835 | 1.445248  |
| C | -0.557446 | -1.735905 | 0.155330  |
| C | -0.758660 | -0.787362 | -1.047096 |
| C | -2.182205 | -0.255900 | -1.172636 |
| C | -2.447741 | 0.665315  | 0.016528  |
| C | 0.191254  | 0.332734  | -0.757249 |
| C | 1.523409  | -0.026663 | -0.563933 |
| C | 2.482141  | 0.919091  | -0.216181 |
| C | 2.074244  | 2.239501  | 0.031490  |
| C | 0.711565  | 2.554889  | 0.029033  |
| C | -0.231472 | 1.576979  | -0.302246 |
| C | 0.906891  | -2.293756 | 0.063552  |
| O | 1.820645  | -1.360180 | -0.659391 |
| C | 1.554477  | -2.553646 | 1.422339  |
| C | 0.930657  | -3.555176 | -0.795722 |
| C | -3.840927 | 1.277243  | -0.014097 |
| O | -1.558022 | 1.830357  | -0.083427 |
| C | 3.100092  | 3.300117  | 0.353166  |
| H | -3.078784 | -0.814655 | 1.402157  |
| H | -2.294595 | 0.555834  | 2.172168  |
| H | -0.101697 | -0.288046 | 1.714950  |
| H | -1.028685 | -1.655044 | 2.280901  |
| H | -1.231423 | -2.595082 | 0.064329  |
| H | -0.462453 | -1.296120 | -1.968821 |
| H | -2.301550 | 0.306998  | -2.102841 |
| H | -2.906852 | -1.075353 | -1.178562 |

|   |           |           |           |
|---|-----------|-----------|-----------|
| H | 3.515924  | 0.618072  | -0.093893 |
| H | 0.365942  | 3.533255  | 0.342286  |
| H | 2.538056  | -3.005255 | 1.278449  |
| H | 0.942076  | -3.234262 | 2.019492  |
| H | 1.684600  | -1.625121 | 1.979827  |
| H | 0.424784  | -4.373986 | -0.278478 |
| H | 0.433022  | -3.386591 | -1.753008 |
| H | 1.963202  | -3.850221 | -0.992710 |
| H | -3.973077 | 1.854327  | -0.931732 |
| H | -4.603736 | 0.496529  | 0.022819  |
| H | -3.981055 | 1.945821  | 0.838594  |
| H | 3.951006  | 2.880200  | 0.895312  |
| H | 3.489758  | 3.752065  | -0.565502 |
| H | 2.670865  | 4.102658  | 0.957283  |

## Ingenane - Method 1

| conf # | Boltzmann pop. (%) | Relative Energy (kcal/mol) |
|--------|--------------------|----------------------------|
| 1      | 70.81              | 0.0                        |
| 2      | 29.19              | 0.52                       |

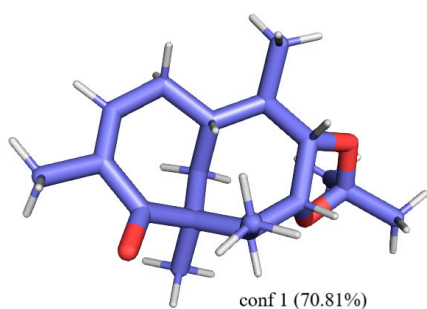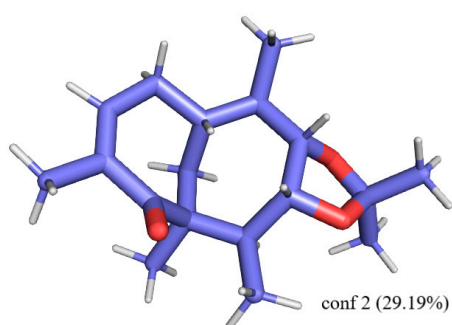

### Cartesian Coordinates for Global Minimum of Ingenane (Conf #1)

|   |           |           |           |
|---|-----------|-----------|-----------|
| C | -0.587238 | 0.199723  | -1.111463 |
| C | -0.572585 | 1.351274  | -0.085566 |
| C | -1.690462 | 2.324428  | -0.432173 |
| C | -3.030658 | 1.630924  | -0.444785 |
| C | -3.388529 | 0.340351  | -0.237311 |
| C | -2.531837 | -0.884402 | 0.053226  |
| C | -1.064486 | -1.070126 | -0.426520 |
| O | -3.091999 | -1.830144 | 0.595583  |
| C | -4.868087 | -0.001753 | -0.207339 |
| C | -0.062019 | -1.449233 | 0.754029  |
| C | 1.340068  | -0.778037 | 0.732458  |
| C | 1.659057  | 0.741301  | 0.877391  |
| C | 0.867198  | 1.843717  | 0.106697  |
| O | 2.085385  | -1.123124 | -0.442083 |
| C | 3.304549  | -0.380943 | -0.370325 |
| O | 3.040688  | 0.747064  | 0.489566  |
| C | 3.671925  | 0.087738  | -1.774832 |
| C | 4.414448  | -1.216331 | 0.271233  |
| C | -1.103056 | -2.242483 | -1.434541 |
| H | -0.874479 | 0.951184  | 0.891605  |
| C | 1.004758  | 3.179869  | 0.847583  |
| H | 1.627674  | 0.996545  | 1.944739  |
| H | 1.853883  | -1.231747 | 1.595563  |
| H | -1.243413 | 0.439484  | -1.956578 |
| H | 0.405313  | 0.028122  | -1.530062 |
| H | -1.749076 | 3.156941  | 0.284597  |
| H | -1.526272 | 2.794230  | -1.416094 |

|   |           |           |           |
|---|-----------|-----------|-----------|
| H | -3.861025 | 2.317783  | -0.617256 |
| H | -5.478690 | 0.871637  | -0.453898 |
| H | -5.104752 | -0.804974 | -0.914591 |
| H | -5.159936 | -0.370322 | 0.781125  |
| H | 1.335761  | 1.957125  | -0.878544 |
| H | 3.836651  | -0.773073 | -2.430899 |
| H | 2.868844  | 0.699230  | -2.194247 |
| H | 4.588337  | 0.685015  | -1.743521 |
| H | 5.307102  | -0.601126 | 0.421916  |
| H | 4.094401  | -1.596852 | 1.245577  |
| H | 4.673869  | -2.064820 | -0.370098 |
| H | -1.494862 | -3.146308 | -0.959124 |
| H | -1.742127 | -2.006136 | -2.294469 |
| H | -0.091857 | -2.441548 | -1.804779 |
| H | 2.061634  | 3.412258  | 1.019516  |
| H | 0.569426  | 4.006258  | 0.274900  |
| H | 0.504942  | 3.149011  | 1.825117  |
| C | -0.624618 | -1.373099 | 2.190971  |
| H | 0.131619  | -1.717256 | 2.906312  |
| H | -1.502026 | -2.012380 | 2.290526  |
| H | -0.917045 | -0.359037 | 2.486384  |
| H | 0.182946  | -2.507116 | 0.599365  |

## Ingenane – Method 2

| conf # | Boltzmann pop. (%) | Relative Energy (kcal/mol) |
|--------|--------------------|----------------------------|
| 2      | 50.79              | 0.0                        |
| 1      | 49.21              | 0.02                       |

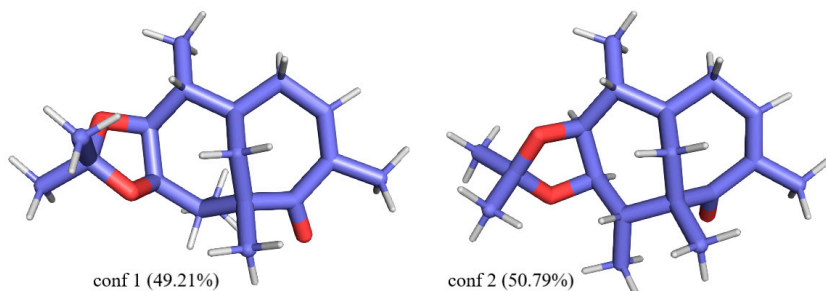

### Cartesian Coordinates for Global Minimum of Ingenane (Conf #2)

|   |           |           |           |
|---|-----------|-----------|-----------|
| C | 0.977236  | 0.339179  | 1.349711  |
| C | 0.869623  | 1.455235  | 0.291304  |
| C | 2.140987  | 2.291015  | 0.332863  |
| C | 3.334673  | 1.405092  | 0.060991  |
| C | 3.365021  | 0.101016  | -0.272427 |
| C | 2.166453  | -0.822613 | -0.489870 |
| C | 1.118392  | -1.000471 | 0.633021  |
| O | 2.143473  | -1.490968 | -1.507382 |
| C | 4.672327  | -0.581817 | -0.613372 |
| C | -0.318337 | -1.420131 | 0.168911  |
| C | -1.112879 | -0.408716 | -0.717995 |
| C | -1.499962 | 1.044619  | -0.285145 |
| C | -0.525364 | 2.081715  | 0.330105  |
| O | -2.449216 | -0.933416 | -0.888424 |
| C | -3.361657 | -0.244076 | -0.010142 |
| O | -2.603376 | 0.805296  | 0.591696  |
| C | -3.861888 | -1.168890 | 1.089723  |
| C | -4.494995 | 0.320349  | -0.861728 |
| C | 1.710191  | -2.059898 | 1.590081  |
| H | 0.916645  | 0.995974  | -0.705120 |
| C | -0.632297 | 3.421933  | -0.404475 |
| H | -1.882826 | 1.483465  | -1.217929 |
| H | -0.661505 | -0.384518 | -1.713450 |
| H | 1.830624  | 0.520382  | 2.006446  |
| H | 0.093880  | 0.312598  | 1.991777  |
| H | 2.128397  | 3.095045  | -0.412750 |
| H | 2.268112  | 2.782529  | 1.307075  |
| H | 4.294711  | 1.916446  | 0.101615  |



|   |           |           |           |
|---|-----------|-----------|-----------|
| H | 5.517324  | 0.099780  | -0.504881 |
| H | 4.841714  | -1.448886 | 0.033954  |
| H | 4.643461  | -0.953172 | -1.640355 |
| H | -0.828385 | 2.234486  | 1.370335  |
| H | -3.019342 | -1.561717 | 1.658475  |
| H | -4.521388 | -0.621405 | 1.766520  |
| H | -4.416205 | -2.001601 | 0.652929  |
| H | -5.225153 | 0.828608  | -0.228535 |
| H | -4.099865 | 1.029221  | -1.591037 |
| H | -4.992737 | -0.488153 | -1.400969 |
| H | 1.890186  | -3.012128 | 1.090246  |
| H | 2.660003  | -1.708353 | 2.002248  |
| H | 1.022925  | -2.228889 | 2.424144  |
| H | -1.667306 | 3.774145  | -0.414532 |
| H | -0.022310 | 4.186754  | 0.082091  |
| H | -0.295944 | 3.331512  | -1.442617 |
| C | -0.393394 | -2.802804 | -0.505301 |
| H | -1.433962 | -3.062444 | -0.696552 |
| H | 0.032208  | -3.576558 | 0.135655  |
| H | 0.153482  | -2.806866 | -1.447256 |
| H | -0.878565 | -1.487982 | 1.107825  |

# Artemisinin - Method 1

| conf # | Boltzmann pop. (%) | Relative Energy (kcal/mol) |
|--------|--------------------|----------------------------|
| 1      | 100.0              | 0.0                        |
| 3      | 0.0                | 7.41                       |
| 2      | 0.0                | 7.53                       |
| 6      | 0.0                | 9.99                       |
| 7      | 0.0                | 10.4                       |
| 4      | 0.0                | 12.34                      |

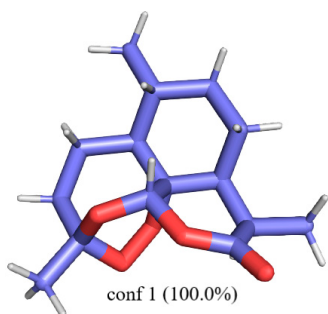

## Cartesian Coordinates for Global Minimum of Artemisinin (Conf #1)

|   |           |           |           |
|---|-----------|-----------|-----------|
| C | 1.152519  | 1.321847  | 0.372654  |
| C | 0.052047  | 0.222919  | 0.365119  |
| C | -1.353431 | 0.782426  | 0.655659  |
| C | -1.696287 | 1.946461  | -0.289308 |
| C | -0.635510 | 3.050077  | -0.200588 |
| C | 0.786550  | 2.547180  | -0.506378 |
| C | 0.058230  | -0.561017 | -0.959223 |
| O | -1.071975 | -1.429102 | -1.157149 |
| C | -2.291313 | -1.263576 | -0.565920 |
| C | -2.367109 | -0.381365 | 0.674084  |
| C | 2.546715  | 0.751173  | 0.016677  |
| C | 2.863757  | -0.665971 | 0.528207  |
| C | 1.844010  | -1.740573 | 0.084036  |
| O | 1.212496  | -1.324363 | -1.142771 |
| C | 2.445576  | -3.113903 | -0.164245 |
| O | 0.839653  | -1.948497 | 1.057205  |
| O | 0.349833  | -0.644745 | 1.494965  |
| C | 1.801259  | 3.691073  | -0.354469 |
| H | -1.314373 | 1.191601  | 1.675690  |
| C | -3.812344 | 0.041441  | 0.956547  |
| O | -3.228719 | -1.884563 | -1.004764 |
| H | 0.031946  | 0.147776  | -1.791757 |
| H | 1.178187  | 1.661903  | 1.418570  |
| H | -2.677057 | 2.354424  | -0.022423 |

|   |           |           |           |
|---|-----------|-----------|-----------|
| H | -1.786792 | 1.591243  | -1.326274 |
| H | -0.887035 | 3.867917  | -0.887698 |
| H | -0.651754 | 3.481207  | 0.811897  |
| H | 0.807831  | 2.225959  | -1.559834 |
| H | -2.039092 | -1.044087 | 1.487022  |
| H | 2.660930  | 0.748153  | -1.074100 |
| H | 3.315360  | 1.428571  | 0.404505  |
| H | 3.848971  | -0.948317 | 0.138801  |
| H | 2.929726  | -0.695087 | 1.620509  |
| H | 1.648737  | -3.838777 | -0.348668 |
| H | 3.089254  | -3.066253 | -1.046975 |
| H | 3.037775  | -3.432762 | 0.698259  |
| H | 1.491341  | 4.559339  | -0.947363 |
| H | 1.874281  | 4.012890  | 0.692482  |
| H | 2.802927  | 3.405034  | -0.689246 |
| H | -3.861806 | 0.637523  | 1.875050  |
| H | -4.232170 | 0.632771  | 0.136955  |
| H | -4.445504 | -0.840018 | 1.077603  |

## Artemisinin - Method 2

| conf # | Boltzmann pop. (%) | Relative Energy (kcal/mol) |
|--------|--------------------|----------------------------|
| 1      | 100.0              | 0.0                        |
| 3      | 0.0                | 7.35                       |
| 2      | 0.0                | 7.38                       |
| 6      | 0.0                | 9.86                       |
| 7      | 0.0                | 10.23                      |
| 4      | 0.0                | 12.05                      |

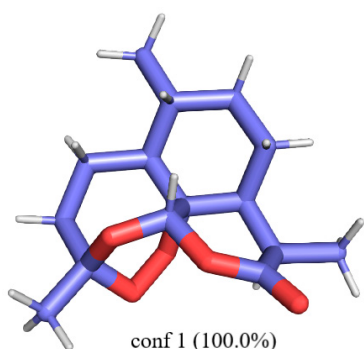

## Cartesian Coordinates for Global Minimum of Artemisinin (Conf #1)

|   |           |           |           |
|---|-----------|-----------|-----------|
| C | 1.148261  | 1.321676  | 0.379621  |
| C | 0.050866  | 0.227093  | 0.367062  |
| C | -1.352106 | 0.782792  | 0.652436  |
| C | -1.694235 | 1.939807  | -0.296604 |
| C | -0.636326 | 3.042157  | -0.203460 |
| C | 0.782486  | 2.538059  | -0.506908 |
| C | 0.063911  | -0.547768 | -0.958770 |
| O | -1.071341 | -1.426379 | -1.154573 |
| C | -2.282599 | -1.267504 | -0.559195 |
| C | -2.364118 | -0.378064 | 0.669155  |
| C | 2.540499  | 0.753374  | 0.025931  |
| C | 2.856240  | -0.660135 | 0.538092  |
| C | 1.846393  | -1.734853 | 0.082520  |
| O | 1.209966  | -1.315929 | -1.145122 |
| C | 2.450198  | -3.100258 | -0.171182 |
| O | 0.833940  | -1.949176 | 1.049070  |
| O | 0.338741  | -0.653810 | 1.493479  |
| C | 1.798267  | 3.678165  | -0.355726 |
| H | -1.315513 | 1.191452  | 1.669255  |
| C | -3.805782 | 0.053050  | 0.946325  |
| O | -3.211349 | -1.903392 | -0.989324 |
| H | 0.026268  | 0.159879  | -1.786540 |

|   |           |           |           |
|---|-----------|-----------|-----------|
| H | 1.167965  | 1.664627  | 1.421592  |
| H | -2.673463 | 2.345176  | -0.034080 |
| H | -1.777913 | 1.580309  | -1.329600 |
| H | -0.885000 | 3.857478  | -0.889421 |
| H | -0.652688 | 3.467378  | 0.808508  |
| H | 0.804097  | 2.210268  | -1.555106 |
| H | -2.042612 | -1.042798 | 1.479960  |
| H | 2.650800  | 0.749683  | -1.062554 |
| H | 3.305187  | 1.429917  | 0.412756  |
| H | 3.842720  | -0.943756 | 0.163499  |
| H | 2.901281  | -0.690177 | 1.628531  |
| H | 1.656127  | -3.821350 | -0.367019 |
| H | 3.098718  | -3.038906 | -1.046031 |
| H | 3.035409  | -3.419530 | 0.692114  |
| H | 1.485323  | 4.546632  | -0.941556 |
| H | 1.873635  | 3.989490  | 0.691502  |
| H | 2.794791  | 3.392149  | -0.696604 |
| H | -3.846026 | 0.663676  | 1.851777  |
| H | -4.218920 | 0.633036  | 0.118858  |
| H | -4.441559 | -0.820697 | 1.086150  |

# Nobilisitine A - Method 1

| conf # | Boltzmann pop. (%) | Relative Energy (kcal/mol) |
|--------|--------------------|----------------------------|
| 3      | 42.08              | 0.0                        |
| 9      | 41.76              | 0.0                        |
| 5      | 8.6                | 0.94                       |
| 17     | 5.93               | 1.16                       |
| 1      | 0.93               | 2.26                       |
| 27     | 0.31               | 2.92                       |
| 7      | 0.24               | 3.06                       |
| 19     | 0.09               | 3.66                       |
| 13     | 0.06               | 3.92                       |
| 20     | 0.01               | 4.95                       |
| 29     | 0.0                | 8.06                       |
| 24     | 0.0                | 8.59                       |
| 21     | 0.0                | 9.15                       |
| 31     | 0.0                | 11.32                      |

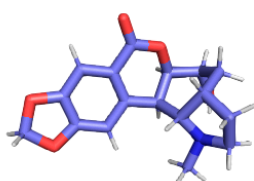

conf 3 (42.08%)

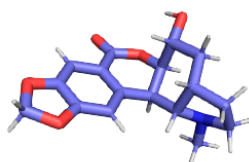

conf 5 (8.60%)

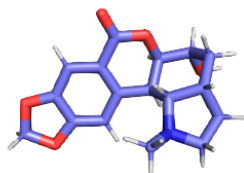

conf 9 (41.76%)

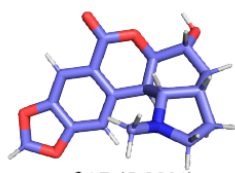

conf 17 (5.93%)

## Cartesian Coordinates for Global Minimum of Nobilisitine A (Conf #3)

|   |           |           |           |
|---|-----------|-----------|-----------|
| C | 3.199147  | 1.163046  | 0.386660  |
| C | 2.361322  | 0.184181  | 1.261803  |
| C | 1.473407  | -0.770617 | 0.434159  |
| C | 0.641196  | -0.099971 | -0.706353 |
| C | 1.173779  | 1.284722  | -1.101733 |
| C | 2.707881  | 1.315457  | -1.066704 |
| C | -0.839917 | -0.017339 | -0.399826 |
| C | -1.396753 | 1.199688  | 0.019547  |
| C | -0.549745 | 2.405061  | 0.215961  |
| O | 0.740902  | 2.334890  | -0.202780 |
| C | -1.658332 | -1.158708 | -0.527740 |
| C | -2.997945 | -1.019663 | -0.229453 |

|   |           |           |           |
|---|-----------|-----------|-----------|
| C | -3.544788 | 0.197265  | 0.186614  |
| C | -2.772936 | 1.323769  | 0.325331  |
| O | -3.976764 | -1.971079 | -0.291268 |
| C | -5.187138 | -1.330034 | 0.144576  |
| O | -4.893206 | 0.045417  | 0.401358  |
| C | 3.249721  | -0.824379 | 2.012682  |
| C | 3.472682  | -1.960889 | 0.988006  |
| N | 2.472112  | -1.736519 | -0.088674 |
| C | 1.927243  | -2.981358 | -0.615378 |
| O | 3.223545  | 0.320242  | -1.938595 |
| H | 0.813206  | 1.535773  | -2.105978 |
| H | 0.760914  | -0.719498 | -1.600877 |
| H | 0.774234  | -1.284010 | 1.118236  |
| H | 1.740079  | 0.758019  | 1.955329  |
| O | -0.939361 | 3.416931  | 0.758508  |
| H | 3.197930  | 2.145291  | 0.867861  |
| H | 4.244883  | 0.837809  | 0.333386  |
| H | 3.050145  | 2.276899  | -1.463339 |
| H | -1.255759 | -2.111955 | -0.854471 |
| H | -3.169930 | 2.275660  | 0.656395  |
| H | -5.939883 | -1.404323 | -0.647681 |
| H | -5.538468 | -1.811047 | 1.065318  |
| H | 2.722289  | -1.210418 | 2.892178  |
| H | 4.187743  | -0.382109 | 2.362003  |
| H | 4.480008  | -1.951068 | 0.555213  |
| H | 3.328892  | -2.945001 | 1.458093  |
| H | 1.377537  | -3.560476 | 0.149448  |
| H | 2.742776  | -3.604899 | -0.995589 |
| H | 1.249652  | -2.784550 | -1.452194 |
| H | 3.135099  | -0.537051 | -1.459311 |

## Nobilisitine A - Method 2

| conf # | Boltzmann pop. (%) | Relative Energy (kcal/mol) |
|--------|--------------------|----------------------------|
| 9      | 22.97              | 0.0                        |
| 10     | 21.81              | 0.03                       |
| 3      | 20.77              | 0.06                       |
| 4      | 12.64              | 0.35                       |
| 6      | 6.43               | 0.75                       |
| 5      | 4.8                | 0.93                       |
| 18     | 4.64               | 0.95                       |
| 17     | 4.47               | 0.97                       |
| 2      | 0.4                | 2.4                        |
| 1      | 0.39               | 2.41                       |
| 8      | 0.16               | 2.95                       |
| 7      | 0.12               | 3.13                       |
| 28     | 0.11               | 3.18                       |
| 27     | 0.08               | 3.34                       |
| 19     | 0.06               | 3.54                       |
| 14     | 0.05               | 3.61                       |
| 12     | 0.03               | 3.95                       |
| 13     | 0.03               | 3.99                       |
| 11     | 0.02               | 4.13                       |
| 20     | 0.01               | 4.72                       |
| 23     | 0.0                | 6.68                       |
| 22     | 0.0                | 6.85                       |
| 26     | 0.0                | 8.14                       |
| 24     | 0.0                | 8.68                       |
| 29     | 0.0                | 9.01                       |
| 30     | 0.0                | 9.03                       |
| 21     | 0.0                | 9.17                       |
| 31     | 0.0                | 11.64                      |

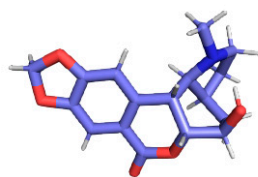

conf 3 (20.77%)

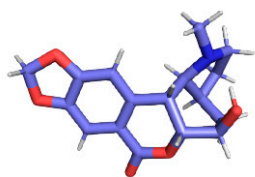

conf 4 (12.64%)

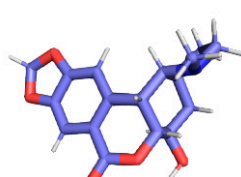

conf 6 (6.43%)

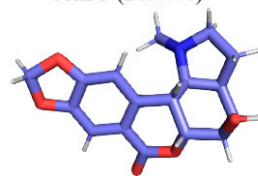

conf 9 (22.97%)

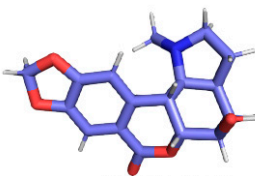

conf 10 (21.81%)



Cartesian Coordinates for Global Minimum of Nobilisitine A (Conf #9)

|   |           |           |           |
|---|-----------|-----------|-----------|
| C | 3.553401  | -0.838263 | -0.354508 |
| C | 3.014533  | 0.558791  | -0.682413 |
| C | 1.476904  | 0.689125  | -0.639568 |
| C | 0.833858  | -0.058089 | 0.566541  |
| C | 1.375576  | -1.467111 | 0.757676  |
| C | 2.898029  | -1.507029 | 0.853306  |
| C | -0.659515 | -0.144622 | 0.403177  |
| C | -1.185263 | -1.270208 | -0.248932 |
| C | -0.290911 | -2.336864 | -0.763222 |
| O | 1.006873  | -2.319707 | -0.357357 |
| C | -1.505101 | 0.892620  | 0.828068  |
| C | -2.853784 | 0.743149  | 0.587563  |
| C | -3.375685 | -0.379620 | -0.060195 |
| C | -2.570988 | -1.399199 | -0.496474 |
| O | -3.860860 | 1.608809  | 0.892445  |
| C | -5.086979 | 0.922276  | 0.568659  |
| O | -4.735122 | -0.246138 | -0.186279 |
| C | 3.457444  | 1.744985  | 0.189177  |
| C | 2.494336  | 2.835542  | -0.287342 |
| N | 1.212900  | 2.137689  | -0.506472 |
| C | 0.391374  | 2.723683  | -1.551945 |
| O | 3.198309  | -0.852565 | 2.092190  |
| H | 0.955761  | -1.903906 | 1.669615  |
| H | 1.079435  | 0.503433  | 1.468507  |
| H | 1.039033  | 0.298051  | -1.563458 |
| H | 3.320263  | 0.792472  | -1.709421 |
| O | -0.641464 | -3.199100 | -1.536884 |
| H | 3.382422  | -1.494146 | -1.213789 |
| H | 4.638227  | -0.800247 | -0.204193 |
| H | 3.206447  | -2.559360 | 0.897023  |
| H | -1.105374 | 1.775245  | 1.307457  |
| H | -2.958741 | -2.265971 | -1.013149 |
| H | -5.586632 | 0.625275  | 1.496386  |
| H | -5.713926 | 1.574202  | -0.038891 |
| H | 4.504463  | 2.015065  | 0.034508  |
| H | 3.313862  | 1.520026  | 1.247338  |
| H | 2.371811  | 3.652296  | 0.430135  |
| H | 2.871522  | 3.273491  | -1.227497 |
| H | 0.867989  | 2.685838  | -2.548928 |
| H | 0.191007  | 3.772575  | -1.315800 |
| H | -0.568923 | 2.207130  | -1.607648 |
| H | 4.155797  | -0.820694 | 2.186797  |

# Intricarene - Method 1

| conf # | Boltzmann pop. (%) | Relative Energy (kcal/mol) |
|--------|--------------------|----------------------------|
| 1      | 50.94              | 0.0                        |
| 3      | 36.95              | 0.19                       |
| 2      | 12.03              | 0.85                       |
| 4      | 0.05               | 4.1                        |
| 5      | 0.03               | 4.51                       |

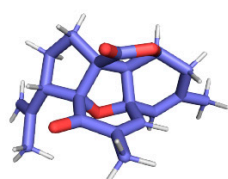

conf 1 (50.94%)

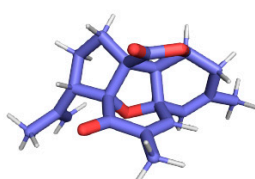

conf 2 (12.03%)

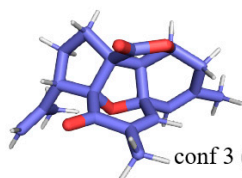

conf 3 (36.95%)

## Cartesian Coordinates for Global Minimum of Intricarene (Conf #1)

|   |           |           |           |
|---|-----------|-----------|-----------|
| C | -3.189086 | -1.388734 | -0.698275 |
| C | -3.468817 | -0.344547 | 0.392564  |
| C | -2.284667 | -0.086648 | 1.370652  |
| C | -1.004543 | -0.694004 | 0.859199  |
| C | -0.908411 | -0.596033 | -0.692995 |
| C | -1.960141 | -1.526753 | -1.227203 |
| O | -1.954922 | 1.322362  | 1.507641  |
| H | -2.542041 | -0.448951 | 2.371613  |
| C | -0.590703 | 1.515914  | 1.535030  |
| C | 0.146605  | 0.185743  | 1.290333  |
| O | -0.110584 | 2.595234  | 1.762334  |
| C | -4.370672 | -2.199110 | -1.160726 |
| C | 1.130776  | 0.042115  | 0.016908  |
| C | 1.012146  | -0.237995 | 2.493739  |
| C | 2.079120  | -1.165700 | 1.900232  |
| C | 2.465507  | -0.498866 | 0.566146  |
| C | 3.278846  | -1.341001 | -0.405380 |
| C | 3.578355  | -0.727749 | -1.752450 |
| C | 3.757606  | -2.544651 | -0.074063 |
| H | 3.054856  | 0.404340  | 0.787433  |
| C | -1.099937 | 0.792317  | -1.313435 |
| C | -0.088924 | 1.669611  | -1.459114 |
| C | 1.196839  | 1.344037  | -0.783818 |

|   |           |           |           |
|---|-----------|-----------|-----------|
| C | -0.191572 | 2.992534  | -2.160336 |
| O | 2.174158  | 2.072151  | -0.816165 |
| H | -3.730193 | 0.616225  | -0.071511 |
| H | -4.355794 | -0.647523 | 0.960029  |
| H | -0.897315 | -1.749872 | 1.113400  |
| H | -1.732642 | -2.235377 | -2.018828 |
| H | -4.094424 | -2.893917 | -1.959640 |
| H | -4.800105 | -2.780417 | -0.333364 |
| H | -5.174446 | -1.551709 | -1.537697 |
| H | 1.477158  | 0.659522  | 2.918334  |
| H | 0.419104  | -0.710004 | 3.285725  |
| H | 1.651969  | -2.157178 | 1.706919  |
| H | 2.936617  | -1.299114 | 2.567000  |
| H | 2.660808  | -0.617225 | -2.343451 |
| H | 4.010584  | 0.274170  | -1.648313 |
| H | 4.273484  | -1.352695 | -2.321429 |
| H | 4.371911  | -3.111601 | -0.768976 |
| H | 3.568724  | -3.011989 | 0.886749  |
| H | -2.086667 | 1.030639  | -1.700958 |
| H | 0.021050  | 3.809483  | -1.461540 |
| H | -1.186827 | 3.140735  | -2.589425 |
| H | 0.552665  | 3.063763  | -2.961886 |
| O | 0.475293  | -0.936519 | -0.836590 |

## Intricarene - Method 2

| conf # | Boltzmann pop. (%) | Relative Energy (kcal/mol) |
|--------|--------------------|----------------------------|
| 1      | 55.73              | 0.0                        |
| 3      | 41.47              | 0.18                       |
| 2      | 2.65               | 1.8                        |
| 4      | 0.11               | 3.7                        |
| 5      | 0.05               | 4.21                       |

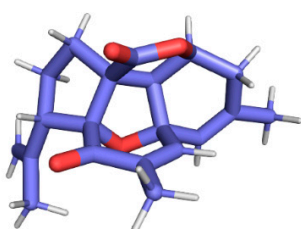

conf 1 (55.73%)

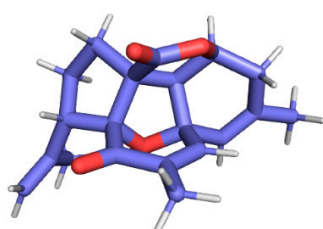

conf 3 (41.47%)

### Cartesian Coordinates for Global Minimum of Intricarene (Conf #1)

|   |           |           |           |
|---|-----------|-----------|-----------|
| C | -3.181692 | -1.380102 | -0.690250 |
| C | -3.453597 | -0.330262 | 0.394018  |
| C | -2.272904 | -0.077976 | 1.369070  |
| C | -0.999321 | -0.691126 | 0.860984  |
| C | -0.905625 | -0.600956 | -0.689211 |
| C | -1.958520 | -1.527514 | -1.220164 |
| O | -1.927227 | 1.339062  | 1.494934  |
| H | -2.524716 | -0.424096 | 2.372138  |
| C | -0.571465 | 1.517565  | 1.521628  |
| C | 0.152276  | 0.184411  | 1.287215  |
| O | -0.080528 | 2.592610  | 1.731884  |
| C | -4.371995 | -2.175990 | -1.145111 |
| C | 1.133682  | 0.033729  | 0.017902  |
| C | 1.007830  | -0.247155 | 2.489176  |
| C | 2.052185  | -1.193745 | 1.890844  |
| C | 2.457393  | -0.514607 | 0.571968  |
| C | 3.260959  | -1.341985 | -0.412961 |
| C | 3.524483  | -0.706428 | -1.754912 |
| C | 3.742057  | -2.547455 | -0.105322 |
| H | 3.052045  | 0.377699  | 0.809419  |
| C | -1.091397 | 0.785190  | -1.311098 |
| C | -0.080934 | 1.658055  | -1.456015 |
| C | 1.199146  | 1.336601  | -0.775074 |
| C | -0.184724 | 2.983306  | -2.147091 |
| O | 2.165208  | 2.073883  | -0.779733 |
| H | -3.701092 | 0.624871  | -0.082334 |

|   |           |           |           |
|---|-----------|-----------|-----------|
| H | -4.342019 | -0.619320 | 0.958918  |
| H | -0.893159 | -1.741989 | 1.121562  |
| H | -1.732840 | -2.232316 | -2.011685 |
| H | -4.110227 | -2.872209 | -1.943757 |
| H | -4.798227 | -2.745501 | -0.311896 |
| H | -5.164373 | -1.513893 | -1.512117 |
| H | 1.493845  | 0.638864  | 2.907629  |
| H | 0.404057  | -0.704196 | 3.276469  |
| H | 1.599924  | -2.167353 | 1.679806  |
| H | 2.900997  | -1.356300 | 2.556571  |
| H | 2.589661  | -0.603459 | -2.314725 |
| H | 3.935145  | 0.300254  | -1.638209 |
| H | 4.215776  | -1.306081 | -2.349529 |
| H | 4.344345  | -3.103319 | -0.816182 |
| H | 3.563880  | -3.022240 | 0.851359  |
| H | -2.077650 | 1.029278  | -1.687986 |
| H | 0.038489  | 3.790942  | -1.444288 |
| H | -1.180573 | 3.138123  | -2.564391 |
| H | 0.551599  | 3.053831  | -2.952634 |
| O | 0.478558  | -0.945921 | -0.831800 |

## Strychnine - Method 1

| conf # | Boltzmann pop. (%) | Relative Energy (kcal/mol) |
|--------|--------------------|----------------------------|
| 1      | 97.42              | 0.0                        |
| 2      | 2.25               | 2.23                       |
| 3      | 0.33               | 3.37                       |

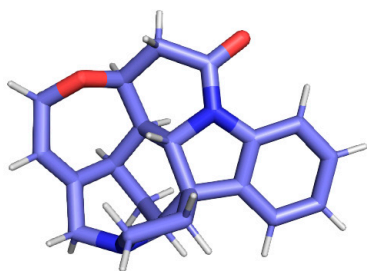

conf 1 (97.42%)

### Cartesian Coordinates for Global Minimum of Strychnine (Conf #1)

|   |           |           |           |
|---|-----------|-----------|-----------|
| C | 4.306884  | -1.417078 | -0.511489 |
| C | 4.636200  | -0.068869 | -0.353024 |
| C | 3.670977  | 0.881507  | -0.004791 |
| C | 2.358992  | 0.438616  | 0.172133  |
| C | 2.012794  | -0.912965 | 0.023167  |
| C | 2.988483  | -1.844524 | -0.315640 |
| N | 1.208793  | 1.197792  | 0.488302  |
| C | 0.001091  | 0.335945  | 0.415113  |
| C | 0.553207  | -1.128282 | 0.365125  |
| C | 1.081753  | 2.562686  | 0.313788  |
| C | -0.358950 | 3.075342  | 0.317333  |
| C | -1.419962 | 2.203583  | -0.412224 |
| C | -0.813755 | 0.836168  | -0.792896 |
| C | -1.739454 | -0.243125 | -1.393285 |
| C | -0.819938 | -1.405188 | -1.817451 |
| C | -0.269083 | -2.078828 | -0.557930 |
| N | -1.368486 | -2.618712 | 0.292619  |
| C | -1.099563 | -2.280977 | 1.702659  |
| C | 0.365580  | -1.839147 | 1.730282  |
| O | -2.523226 | 2.141963  | 0.487915  |
| C | -3.713931 | 1.536234  | -0.022064 |
| C | -3.716722 | 0.034899  | 0.139098  |
| C | -2.820920 | -0.767451 | -0.447777 |
| O | 2.038364  | 3.317216  | 0.193633  |
| C | -2.721323 | -2.250670 | -0.154942 |
| H | -0.600725 | 0.478768  | 1.318581  |

|   |           |           |           |
|---|-----------|-----------|-----------|
| H | -0.086050 | 1.061386  | -1.586932 |
| H | -1.748851 | 2.706883  | -1.336060 |
| H | 5.074693  | -2.136924 | -0.780646 |
| H | 5.662884  | 0.255189  | -0.501658 |
| H | 3.914297  | 1.928259  | 0.113849  |
| H | 2.733642  | -2.895872 | -0.425762 |
| H | -0.686440 | 3.148237  | 1.362062  |
| H | -0.326804 | 4.092678  | -0.077106 |
| H | -2.223197 | 0.186816  | -2.283604 |
| H | 0.010253  | -1.034397 | -2.429565 |
| H | -1.357670 | -2.137306 | -2.429769 |
| H | 0.389075  | -2.908640 | -0.853598 |
| H | -1.286690 | -3.144151 | 2.354022  |
| H | -1.751124 | -1.462114 | 2.050067  |
| H | 1.032238  | -2.708087 | 1.774394  |
| H | 0.605518  | -1.192029 | 2.580058  |
| H | -3.853295 | 1.827473  | -1.077007 |
| H | -4.533581 | 1.981393  | 0.549506  |
| H | -4.459281 | -0.393092 | 0.811571  |
| H | -2.973599 | -2.842961 | -1.044962 |
| H | -3.432700 | -2.545743 | 0.622614  |

## Strychnine - Method 2

| conf # | Boltzmann pop. (%) | Relative Energy (kcal/mol) |
|--------|--------------------|----------------------------|
| 1      | 98.16              | 0.0                        |
| 2      | 1.57               | 2.45                       |
| 3      | 0.27               | 3.5                        |

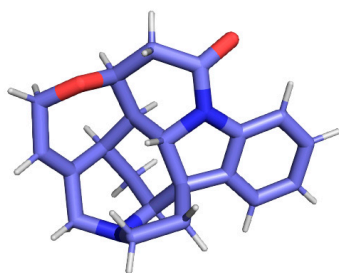

conf 1 (98.16%)

### Cartesian Coordinates for Global Minimum of Strychnine (Conf #1)

|   |           |           |           |
|---|-----------|-----------|-----------|
| C | 4.288261  | -1.423845 | -0.520447 |
| C | 4.625693  | -0.080431 | -0.357073 |
| C | 3.666293  | 0.872361  | -0.004339 |
| C | 2.353213  | 0.438832  | 0.172308  |
| C | 2.002879  | -0.908410 | 0.020282  |
| C | 2.968819  | -1.843214 | -0.324089 |
| N | 1.205961  | 1.199764  | 0.488280  |
| C | -0.004056 | 0.337900  | 0.413298  |
| C | 0.549642  | -1.121065 | 0.366341  |
| C | 1.079509  | 2.558866  | 0.318491  |
| C | -0.356324 | 3.068699  | 0.309915  |
| C | -1.411051 | 2.197997  | -0.422932 |
| C | -0.807883 | 0.832513  | -0.797978 |
| C | -1.734225 | -0.246928 | -1.390116 |
| C | -0.814651 | -1.408632 | -1.810381 |
| C | -0.265743 | -2.076500 | -0.549945 |
| N | -1.362886 | -2.614935 | 0.307680  |
| C | -1.097921 | -2.243741 | 1.712266  |
| C | 0.369921  | -1.821375 | 1.734024  |
| O | -2.516436 | 2.131980  | 0.478025  |
| C | -3.708657 | 1.525626  | -0.040621 |
| C | -3.708404 | 0.029911  | 0.139599  |
| C | -2.812493 | -0.768637 | -0.441928 |
| O | 2.035420  | 3.313787  | 0.206708  |
| C | -2.715120 | -2.248629 | -0.146139 |
| H | -0.608385 | 0.482027  | 1.310830  |
| H | -0.079619 | 1.050785  | -1.589623 |



|   |           |           |           |
|---|-----------|-----------|-----------|
| H | -1.736847 | 2.699440  | -1.344255 |
| H | 5.049846  | -2.145014 | -0.793251 |
| H | 5.651630  | 0.237702  | -0.504773 |
| H | 3.918543  | 1.913672  | 0.120335  |
| H | 2.705027  | -2.889082 | -0.434745 |
| H | -0.682204 | 3.132864  | 1.353003  |
| H | -0.326746 | 4.084281  | -0.080762 |
| H | -2.222574 | 0.179286  | -2.274977 |
| H | 0.015796  | -1.039162 | -2.417623 |
| H | -1.348128 | -2.140533 | -2.420716 |
| H | 0.392555  | -2.903889 | -0.836838 |
| H | -1.301547 | -3.083836 | 2.382246  |
| H | -1.736953 | -1.405956 | 2.029205  |
| H | 1.025460  | -2.695796 | 1.772677  |
| H | 0.621684  | -1.171330 | 2.574226  |
| H | -3.829668 | 1.799048  | -1.099431 |
| H | -4.532088 | 1.979045  | 0.512864  |
| H | -4.443436 | -0.393787 | 0.818493  |
| H | -2.962853 | -2.836812 | -1.036092 |
| H | -3.429086 | -2.540681 | 0.626387  |

# Holstiine - Method 1

| conf # | Boltzmann pop. (%) | Relative Energy (kcal/mol) |
|--------|--------------------|----------------------------|
| 8      | 98.89              | 0.0                        |
| 1      | 0.73               | 2.91                       |
| 10     | 0.37               | 3.3                        |
| 22     | 0.0                | 5.9                        |
| 3      | 0.0                | 7.05                       |
| 2      | 0.0                | 7.42                       |
| 7      | 0.0                | 7.93                       |
| 12     | 0.0                | 8.4                        |
| 6      | 0.0                | 10.81                      |
| 26     | 0.0                | 11.2                       |
| 21     | 0.0                | 11.27                      |
| 25     | 0.0                | 12.55                      |
| 29     | 0.0                | 12.81                      |
| 27     | 0.0                | 13.07                      |

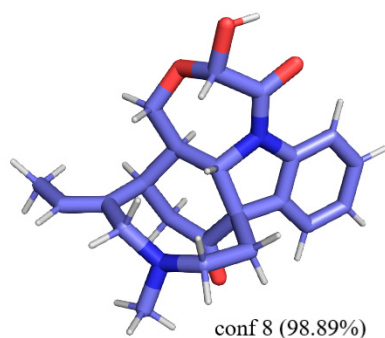

## Cartesian Coordinates for Global Minimum of Holstiine (Conf #8)

|   |           |           |           |
|---|-----------|-----------|-----------|
| C | 3.415742  | -3.034805 | -1.025862 |
| C | 4.274716  | -1.933418 | -1.010372 |
| C | 3.833354  | -0.670848 | -0.601801 |
| C | 2.498827  | -0.548513 | -0.210689 |
| C | 1.631969  | -1.646076 | -0.213124 |
| C | 2.083552  | -2.896238 | -0.621246 |
| N | 1.802939  | 0.608193  | 0.222407  |
| C | 0.337761  | 0.324316  | 0.313902  |
| C | 0.263123  | -1.244684 | 0.328356  |
| C | 2.359447  | 1.831080  | 0.435246  |
| C | 1.399172  | 3.006620  | 0.750637  |
| C | -0.583894 | 2.561395  | -0.526386 |
| C | -0.427493 | 1.058116  | -0.818695 |
| C | -1.794240 | 0.429053  | -1.215487 |
| C | -1.556265 | -1.049576 | -1.584391 |
| C | -0.847926 | -1.881291 | -0.533408 |
| N | -2.288562 | -1.095002 | 1.386066  |
| C | -1.244821 | -1.285435 | 2.400217  |

|   |           |           |           |
|---|-----------|-----------|-----------|
| C | 0.077630  | -1.788443 | 1.770546  |
| C | -4.614652 | 1.566138  | -2.023452 |
| C | -4.166413 | 1.102065  | -0.666066 |
| C | -2.972578 | 0.632006  | -0.262523 |
| O | 3.562132  | 2.073967  | 0.328313  |
| C | -2.802041 | 0.265592  | 1.202826  |
| H | -0.007646 | 0.703331  | 1.277280  |
| H | 0.202666  | 0.973847  | -1.714930 |
| O | -1.019759 | -3.091678 | -0.483058 |
| C | -3.320128 | -2.122672 | 1.367736  |
| O | 0.640349  | 3.270373  | -0.429336 |
| O | 2.150199  | 4.104749  | 1.087421  |
| H | 3.781678  | -4.004461 | -1.351406 |
| H | 5.308585  | -2.051433 | -1.323464 |
| H | 4.492897  | 0.185084  | -0.584884 |
| H | 1.402164  | -3.740631 | -0.629300 |
| H | 0.706188  | 2.777250  | 1.575859  |
| H | -1.129484 | 3.034909  | -1.348641 |
| H | -1.176384 | 2.711283  | 0.391709  |
| H | -2.065748 | 0.932755  | -2.148106 |
| H | -2.487562 | -1.562271 | -1.841774 |
| H | -0.919305 | -1.084155 | -2.482649 |
| H | -1.074397 | -0.337112 | 2.923265  |
| H | -1.579309 | -1.994514 | 3.169275  |
| H | 0.076819  | -2.879067 | 1.700086  |
| H | 0.929759  | -1.501182 | 2.398259  |
| H | -5.448670 | 0.948053  | -2.382320 |
| H | -4.993046 | 2.595622  | -1.969791 |
| H | -3.831832 | 1.537688  | -2.785394 |
| H | -4.946553 | 1.165895  | 0.094980  |
| H | -3.759586 | 0.412544  | 1.730648  |
| H | -2.094015 | 0.957993  | 1.672739  |
| H | -4.007817 | -1.929985 | 0.538444  |
| H | -3.905080 | -2.150657 | 2.303964  |
| H | -2.862686 | -3.102059 | 1.199453  |
| H | 3.055315  | 3.903364  | 0.764868  |

## Holstiine - Method 2

| conf # | Boltzmann pop. (%) | Relative Energy (kcal/mol) |
|--------|--------------------|----------------------------|
| 8      | 96.91              | 0.0                        |
| 10     | 1.91               | 2.33                       |
| 1      | 1.14               | 2.63                       |
| 22     | 0.03               | 4.85                       |
| 20     | 0.01               | 5.64                       |
| 3      | 0.0                | 6.24                       |
| 13     | 0.0                | 6.68                       |
| 2      | 0.0                | 7.28                       |
| 7      | 0.0                | 7.62                       |
| 11     | 0.0                | 7.71                       |
| 6      | 0.0                | 10.35                      |
| 21     | 0.0                | 10.59                      |
| 26     | 0.0                | 11.86                      |
| 25     | 0.0                | 12.1                       |
| 29     | 0.0                | 13.0                       |
| 27     | 0.0                | 13.21                      |

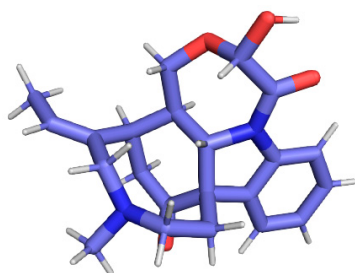

conf 8 (96.91%)

## Cartesian Coordinates for Global Minimum of Holstiine (Conf #8)

|   |           |           |           |
|---|-----------|-----------|-----------|
| C | 3.381266  | -3.036451 | -1.040060 |
| C | 4.242892  | -1.939601 | -1.039848 |
| C | 3.810407  | -0.676518 | -0.628405 |
| C | 2.483882  | -0.547407 | -0.220609 |
| C | 1.615653  | -1.640518 | -0.210856 |
| C | 2.056703  | -2.890917 | -0.618746 |
| N | 1.797054  | 0.608944  | 0.220407  |
| C | 0.330323  | 0.329028  | 0.311020  |
| C | 0.259994  | -1.234718 | 0.346353  |
| C | 2.354192  | 1.824700  | 0.439806  |
| C | 1.381570  | 2.992061  | 0.741003  |
| C | -0.585059 | 2.542237  | -0.571524 |
| C | -0.421404 | 1.039742  | -0.837893 |
| C | -1.785930 | 0.410626  | -1.222279 |

|   |           |           |           |
|---|-----------|-----------|-----------|
| C | -1.564649 | -1.075704 | -1.550719 |
| C | -0.862776 | -1.882915 | -0.484622 |
| N | -2.249578 | -1.067803 | 1.380561  |
| C | -1.225676 | -1.258315 | 2.415971  |
| C | 0.106133  | -1.750250 | 1.798050  |
| C | -4.594185 | 1.515732  | -2.036550 |
| C | -4.146442 | 1.092407  | -0.668077 |
| C | -2.951787 | 0.638208  | -0.265417 |
| O | 3.553378  | 2.069307  | 0.343399  |
| C | -2.754668 | 0.297571  | 1.197998  |
| H | -0.015848 | 0.717397  | 1.265082  |
| H | 0.213469  | 0.937518  | -1.725534 |
| O | -1.026886 | -3.091129 | -0.414886 |
| C | -3.295891 | -2.080008 | 1.359527  |
| O | 0.647125  | 3.250710  | -0.454253 |
| O | 2.114485  | 4.105595  | 1.088133  |
| H | 3.739228  | -4.006135 | -1.365707 |
| H | 5.269533  | -2.061577 | -1.365835 |
| H | 4.472999  | 0.174203  | -0.622263 |
| H | 1.372342  | -3.729483 | -0.610225 |
| H | 0.683156  | 2.758636  | 1.555254  |
| H | -1.106956 | 3.003679  | -1.411203 |
| H | -1.193720 | 2.707085  | 0.328600  |
| H | -2.054748 | 0.892513  | -2.163207 |
| H | -2.501813 | -1.582166 | -1.786845 |
| H | -0.928559 | -1.147621 | -2.443782 |
| H | -1.066983 | -0.314937 | 2.944637  |
| H | -1.569050 | -1.973306 | 3.169875  |
| H | 0.131983  | -2.839453 | 1.755377  |
| H | 0.954580  | -1.423334 | 2.405689  |
| H | -5.428744 | 0.890119  | -2.371897 |
| H | -4.967430 | 2.545303  | -2.012976 |
| H | -3.812609 | 1.459007  | -2.794255 |
| H | -4.920754 | 1.171218  | 0.093898  |
| H | -3.694636 | 0.455322  | 1.746936  |
| H | -2.031890 | 0.989091  | 1.637366  |
| H | -3.955738 | -1.898484 | 0.508384  |
| H | -3.901244 | -2.072080 | 2.279040  |
| H | -2.846981 | -3.066224 | 1.230456  |
| H | 3.015970  | 3.935909  | 0.762476  |

### Colchicine - Method 1

| conf # | Boltzmann pop. (%) | Relative Energy (kcal/mol) |
|--------|--------------------|----------------------------|
| 2      | 34.33              | 0.0                        |
| 5      | 10.27              | 0.71                       |
| 9      | 8.54               | 0.82                       |
| 1      | 7.97               | 0.86                       |
| 11     | 7.85               | 0.87                       |
| 7      | 4.7                | 1.18                       |
| 15     | 3.23               | 1.4                        |
| 21     | 2.9                | 1.46                       |
| 19     | 2.06               | 1.67                       |
| 18     | 1.63               | 1.81                       |
| 10     | 1.61               | 1.81                       |
| 3      | 1.28               | 1.95                       |
| 33     | 1.19               | 1.99                       |
| 12     | 1.11               | 2.03                       |
| 6      | 0.97               | 2.11                       |
| 39     | 0.96               | 2.12                       |
| 4      | 0.88               | 2.17                       |
| 32     | 0.79               | 2.23                       |
| 48     | 0.74               | 2.27                       |
| 61     | 0.71               | 2.29                       |
| 36     | 0.66               | 2.34                       |
| 22     | 0.47               | 2.54                       |
| 75     | 0.43               | 2.59                       |
| 35     | 0.39               | 2.66                       |
| 34     | 0.38               | 2.67                       |
| 8      | 0.31               | 2.78                       |
| 26     | 0.3                | 2.81                       |
| 14     | 0.25               | 2.92                       |
| 24     | 0.24               | 2.93                       |
| 20     | 0.23               | 2.98                       |
| 51     | 0.22               | 2.99                       |
| 42     | 0.21               | 3.02                       |
| 16     | 0.18               | 3.1                        |
| 29     | 0.15               | 3.21                       |
| 25     | 0.15               | 3.24                       |
| 115    | 0.12               | 3.35                       |
| 38     | 0.12               | 3.37                       |
| 67     | 0.11               | 3.42                       |
| 23     | 0.1                | 3.45                       |
| 55     | 0.09               | 3.51                       |
| 73     | 0.09               | 3.52                       |
| 17     | 0.09               | 3.55                       |
| 66     | 0.08               | 3.56                       |
| 68     | 0.08               | 3.57                       |
| 30     | 0.06               | 3.73                       |

|     |      |      |
|-----|------|------|
| 40  | 0.05 | 3.89 |
| 63  | 0.05 | 3.89 |
| 72  | 0.04 | 3.96 |
| 81  | 0.04 | 3.97 |
| 99  | 0.04 | 4.01 |
| 50  | 0.04 | 4.01 |
| 41  | 0.04 | 4.07 |
| 53  | 0.03 | 4.09 |
| 46  | 0.03 | 4.11 |
| 44  | 0.03 | 4.13 |
| 52  | 0.03 | 4.15 |
| 124 | 0.03 | 4.16 |
| 45  | 0.02 | 4.3  |
| 49  | 0.02 | 4.31 |
| 71  | 0.02 | 4.37 |
| 47  | 0.02 | 4.44 |
| 100 | 0.02 | 4.46 |
| 91  | 0.02 | 4.49 |
| 64  | 0.02 | 4.51 |
| 101 | 0.02 | 4.53 |
| 107 | 0.02 | 4.54 |
| 94  | 0.01 | 4.61 |
| 83  | 0.01 | 4.67 |
| 104 | 0.01 | 4.7  |
| 70  | 0.01 | 4.81 |
| 121 | 0.01 | 4.87 |
| 31  | 0.01 | 4.9  |
| 116 | 0.01 | 4.9  |
| 110 | 0.01 | 4.99 |
| 86  | 0.01 | 5.04 |
| 112 | 0.01 | 5.07 |
| 78  | 0.01 | 5.11 |
| 84  | 0.01 | 5.22 |
| 77  | 0.0  | 5.25 |
| 133 | 0.0  | 5.36 |
| 113 | 0.0  | 5.36 |
| 125 | 0.0  | 5.37 |
| 134 | 0.0  | 5.41 |
| 59  | 0.0  | 5.49 |
| 137 | 0.0  | 5.6  |
| 58  | 0.0  | 5.65 |
| 132 | 0.0  | 5.67 |
| 62  | 0.0  | 5.72 |
| 136 | 0.0  | 5.77 |
| 135 | 0.0  | 5.84 |
| 93  | 0.0  | 5.94 |
| 60  | 0.0  | 5.97 |
| 65  | 0.0  | 6.13 |
| 87  | 0.0  | 6.23 |
| 90  | 0.0  | 6.31 |

|     |     |       |
|-----|-----|-------|
| 144 | 0.0 | 6.55  |
| 89  | 0.0 | 6.55  |
| 127 | 0.0 | 6.61  |
| 88  | 0.0 | 6.61  |
| 96  | 0.0 | 6.67  |
| 85  | 0.0 | 6.69  |
| 98  | 0.0 | 6.75  |
| 103 | 0.0 | 6.83  |
| 126 | 0.0 | 7.04  |
| 102 | 0.0 | 7.09  |
| 128 | 0.0 | 7.09  |
| 122 | 0.0 | 7.11  |
| 123 | 0.0 | 7.3   |
| 129 | 0.0 | 7.39  |
| 130 | 0.0 | 7.69  |
| 141 | 0.0 | 8.02  |
| 143 | 0.0 | 8.35  |
| 118 | 0.0 | 9.4   |
| 142 | 0.0 | 10.77 |

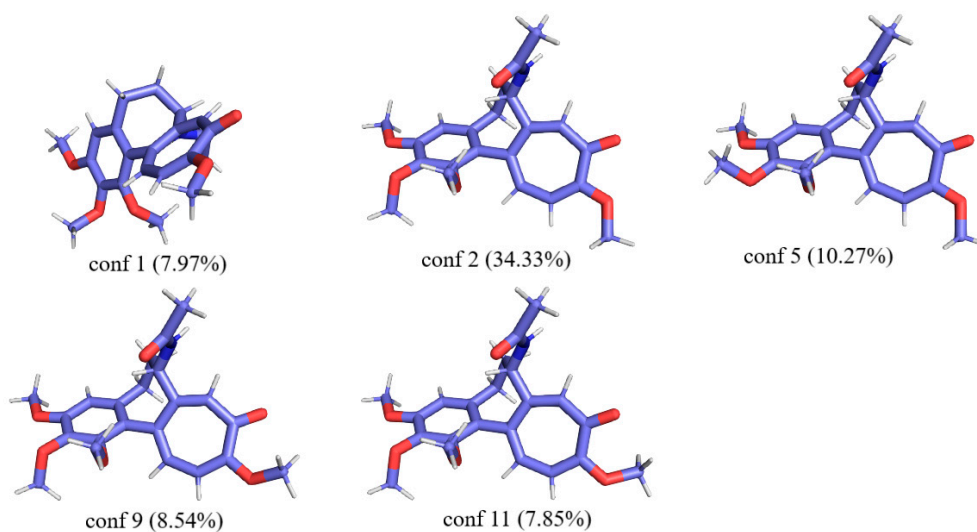

#### Cartesian Coordinates for Global Minimum of Colchicine (Conf #2)

|   |           |           |           |
|---|-----------|-----------|-----------|
| C | -0.660294 | 1.155268  | -2.442247 |
| C | -1.535543 | 0.411441  | -1.456497 |
| C | -0.927372 | -0.357705 | -0.443063 |
| C | 0.558464  | -0.542935 | -0.408559 |
| C | 1.405322  | 0.629885  | -0.440638 |
| C | 0.652622  | 1.974799  | -0.393661 |
| C | 0.072331  | 2.342620  | -1.775046 |
| C | -2.926817 | 0.538921  | -1.512713 |
| C | -3.745253 | -0.079499 | -0.562001 |
| C | -3.150908 | -0.806952 | 0.485986  |



|   |           |           |           |
|---|-----------|-----------|-----------|
| C | -1.759212 | -0.947567 | 0.532495  |
| C | 1.022987  | -1.837773 | -0.347502 |
| C | 2.337681  | -2.376582 | -0.319969 |
| C | 3.562467  | -1.766338 | -0.431970 |
| C | 3.836215  | -0.315275 | -0.619054 |
| C | 2.768460  | 0.674200  | -0.530414 |
| O | -3.937102 | -1.319582 | 1.488270  |
| C | -4.237890 | -2.710496 | 1.353811  |
| O | -5.105874 | -0.029250 | -0.551007 |
| C | -5.754863 | 0.726515  | -1.560996 |
| O | -1.215107 | -1.683396 | 1.560065  |
| C | -1.012946 | -0.927351 | 2.766481  |
| O | 4.996033  | 0.059503  | -0.810773 |
| O | 4.724296  | -2.449208 | -0.400849 |
| C | 4.719696  | -3.854405 | -0.197074 |
| N | 1.421086  | 3.084826  | 0.139338  |
| H | 1.981732  | 3.643167  | -0.488770 |
| C | 1.521465  | 3.297274  | 1.491336  |
| C | 2.431038  | 4.442499  | 1.907411  |
| O | 0.926266  | 2.606978  | 2.310009  |
| H | -1.259399 | 1.527419  | -3.280279 |
| H | 0.084591  | 0.470883  | -2.865521 |
| H | -0.176598 | 1.846323  | 0.304683  |
| H | 0.879900  | 2.682022  | -2.439488 |
| H | -0.616305 | 3.185611  | -1.639754 |
| H | -3.364856 | 1.125482  | -2.312920 |
| H | 0.250184  | -2.598500 | -0.299600 |
| H | 2.350358  | -3.457230 | -0.219446 |
| H | 3.213554  | 1.665634  | -0.542846 |
| H | -4.866327 | -2.970295 | 2.209073  |
| H | -4.791034 | -2.903985 | 0.426006  |
| H | -3.322839 | -3.313231 | 1.374475  |
| H | -6.823592 | 0.638215  | -1.357680 |
| H | -5.464838 | 1.784772  | -1.522237 |
| H | -5.542152 | 0.331055  | -2.563263 |
| H | -0.531248 | -1.608063 | 3.471964  |
| H | -0.362133 | -0.063421 | 2.584910  |
| H | -1.972799 | -0.591240 | 3.173018  |
| H | 5.769726  | -4.149906 | -0.179992 |
| H | 4.247830  | -4.119708 | 0.757510  |
| H | 4.206731  | -4.377536 | -1.014323 |
| H | 2.669687  | 5.131285  | 1.090556  |
| H | 1.950709  | 4.995311  | 2.718409  |
| H | 3.367519  | 4.028540  | 2.297728  |

## Colchicine - Method 2

| conf # | Boltzmann pop. (%) | Relative Energy (kcal/mol) |
|--------|--------------------|----------------------------|
| 2      | 22.21              | 0.0                        |
| 9      | 10.91              | 0.42                       |
| 7      | 10.51              | 0.44                       |
| 3      | 8.01               | 0.6                        |
| 1      | 6.67               | 0.71                       |
| 11     | 6.15               | 0.76                       |
| 18     | 3.76               | 1.05                       |
| 4      | 3.01               | 1.18                       |
| 5      | 2.31               | 1.34                       |
| 42     | 2.16               | 1.38                       |
| 6      | 2.13               | 1.39                       |
| 48     | 2.09               | 1.4                        |
| 32     | 2.08               | 1.4                        |
| 21     | 2.06               | 1.41                       |
| 12     | 2.0                | 1.43                       |
| 20     | 1.6                | 1.56                       |
| 15     | 1.31               | 1.67                       |
| 54     | 1.19               | 1.73                       |
| 61     | 1.15               | 1.75                       |
| 19     | 1.13               | 1.77                       |
| 40     | 0.97               | 1.85                       |
| 35     | 0.69               | 2.05                       |
| 33     | 0.67               | 2.07                       |
| 39     | 0.61               | 2.13                       |
| 36     | 0.45               | 2.31                       |
| 23     | 0.38               | 2.4                        |
| 25     | 0.34               | 2.47                       |
| 51     | 0.29               | 2.56                       |
| 67     | 0.28               | 2.58                       |
| 73     | 0.26               | 2.63                       |
| 14     | 0.23               | 2.7                        |
| 10     | 0.23               | 2.71                       |
| 38     | 0.16               | 2.94                       |
| 68     | 0.14               | 3.02                       |
| 46     | 0.13               | 3.02                       |
| 34     | 0.13               | 3.05                       |
| 52     | 0.12               | 3.08                       |
| 55     | 0.1                | 3.19                       |
| 75     | 0.08               | 3.37                       |
| 22     | 0.08               | 3.37                       |
| 30     | 0.07               | 3.42                       |
| 81     | 0.07               | 3.45                       |
| 63     | 0.06               | 3.48                       |
| 120    | 0.06               | 3.49                       |
| 29     | 0.06               | 3.51                       |
| 76     | 0.05               | 3.64                       |
| 26     | 0.05               | 3.65                       |

|     |      |      |
|-----|------|------|
| 17  | 0.05 | 3.65 |
| 53  | 0.04 | 3.68 |
| 115 | 0.04 | 3.72 |
| 72  | 0.04 | 3.75 |
| 66  | 0.04 | 3.78 |
| 16  | 0.04 | 3.79 |
| 100 | 0.03 | 3.83 |
| 47  | 0.03 | 3.86 |
| 91  | 0.03 | 3.88 |
| 124 | 0.03 | 3.9  |
| 125 | 0.03 | 3.96 |
| 114 | 0.03 | 3.96 |
| 110 | 0.03 | 3.98 |
| 92  | 0.03 | 4.01 |
| 50  | 0.02 | 4.06 |
| 41  | 0.02 | 4.12 |
| 44  | 0.02 | 4.2  |
| 116 | 0.02 | 4.21 |
| 107 | 0.02 | 4.21 |
| 86  | 0.02 | 4.27 |
| 71  | 0.02 | 4.3  |
| 31  | 0.01 | 4.32 |
| 45  | 0.01 | 4.44 |
| 49  | 0.01 | 4.45 |
| 64  | 0.01 | 4.5  |
| 121 | 0.01 | 4.51 |
| 83  | 0.01 | 4.54 |
| 77  | 0.01 | 4.7  |
| 99  | 0.01 | 4.75 |
| 78  | 0.01 | 4.79 |
| 69  | 0.01 | 4.8  |
| 133 | 0.01 | 4.82 |
| 106 | 0.01 | 4.88 |
| 84  | 0.01 | 4.97 |
| 104 | 0.0  | 5.1  |
| 59  | 0.0  | 5.13 |
| 58  | 0.0  | 5.13 |
| 132 | 0.0  | 5.24 |
| 62  | 0.0  | 5.24 |
| 70  | 0.0  | 5.27 |
| 94  | 0.0  | 5.43 |
| 93  | 0.0  | 5.44 |
| 112 | 0.0  | 5.48 |
| 101 | 0.0  | 5.51 |
| 136 | 0.0  | 5.59 |
| 60  | 0.0  | 5.61 |
| 65  | 0.0  | 5.78 |
| 113 | 0.0  | 5.8  |
| 87  | 0.0  | 5.82 |
| 137 | 0.0  | 5.89 |

|     |     |       |
|-----|-----|-------|
| 134 | 0.0 | 5.92  |
| 85  | 0.0 | 5.95  |
| 96  | 0.0 | 5.97  |
| 122 | 0.0 | 6.18  |
| 102 | 0.0 | 6.19  |
| 144 | 0.0 | 6.19  |
| 135 | 0.0 | 6.2   |
| 103 | 0.0 | 6.3   |
| 90  | 0.0 | 6.38  |
| 126 | 0.0 | 6.45  |
| 88  | 0.0 | 6.46  |
| 139 | 0.0 | 6.48  |
| 145 | 0.0 | 6.51  |
| 89  | 0.0 | 6.52  |
| 123 | 0.0 | 6.83  |
| 129 | 0.0 | 6.99  |
| 128 | 0.0 | 6.99  |
| 149 | 0.0 | 7.1   |
| 98  | 0.0 | 7.13  |
| 141 | 0.0 | 7.27  |
| 150 | 0.0 | 7.44  |
| 131 | 0.0 | 7.54  |
| 138 | 0.0 | 7.57  |
| 130 | 0.0 | 7.64  |
| 146 | 0.0 | 7.68  |
| 148 | 0.0 | 7.91  |
| 147 | 0.0 | 8.01  |
| 143 | 0.0 | 8.35  |
| 118 | 0.0 | 9.21  |
| 142 | 0.0 | 10.44 |

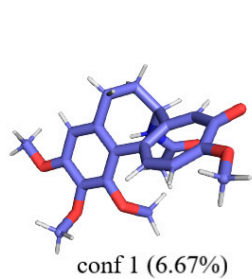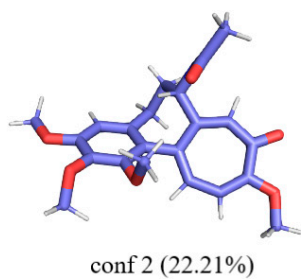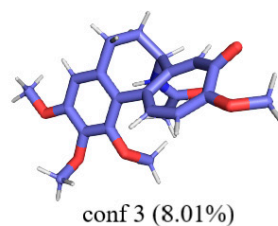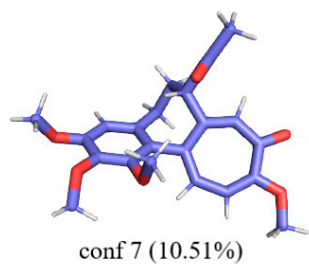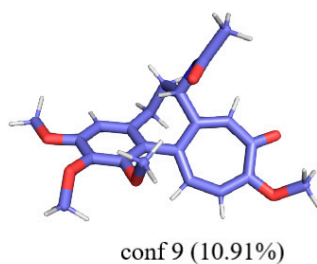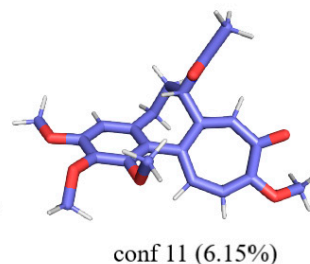

Cartesian Coordinates for Global Minimum of Colchicine (Conf #2)

|   |           |           |           |
|---|-----------|-----------|-----------|
| C | -0.694940 | 1.173227  | -2.445766 |
| C | -1.559521 | 0.406529  | -1.471268 |
| C | -0.940150 | -0.373824 | -0.478884 |
| C | 0.544759  | -0.541117 | -0.445552 |
| C | 1.365976  | 0.641665  | -0.450602 |
| C | 0.588338  | 1.968134  | -0.376794 |
| C | 0.016112  | 2.357643  | -1.753176 |
| C | -2.948666 | 0.538558  | -1.500158 |
| C | -3.750396 | -0.083056 | -0.539143 |
| C | -3.138798 | -0.815731 | 0.493558  |
| C | -1.751826 | -0.969937 | 0.502802  |
| C | 1.028687  | -1.826708 | -0.398106 |
| C | 2.349210  | -2.335617 | -0.362183 |
| C | 3.561942  | -1.700825 | -0.460642 |
| C | 3.805311  | -0.247773 | -0.653267 |
| C | 2.726673  | 0.716752  | -0.540344 |
| O | -3.903594 | -1.328201 | 1.510509  |
| C | -4.155133 | -2.738537 | 1.408043  |
| O | -5.106773 | -0.025715 | -0.500215 |
| C | -5.781774 | 0.730176  | -1.504975 |
| O | -1.190704 | -1.711320 | 1.516333  |
| C | -0.851357 | -0.921562 | 2.673405  |
| O | 4.956377  | 0.147416  | -0.862513 |
| O | 4.731933  | -2.361194 | -0.419183 |
| C | 4.756819  | -3.774566 | -0.209518 |
| N | 1.342472  | 3.071755  | 0.187248  |
| H | 1.798421  | 3.725516  | -0.429763 |
| C | 1.516924  | 3.190613  | 1.534871  |
| C | 2.379268  | 4.350543  | 1.990664  |
| O | 1.021968  | 2.399430  | 2.328575  |
| H | -1.294069 | 1.548705  | -3.277514 |
| H | 0.059048  | 0.504939  | -2.871741 |
| H | -0.244907 | 1.800053  | 0.306353  |
| H | 0.824313  | 2.717852  | -2.399621 |
| H | -0.684705 | 3.184368  | -1.604248 |
| H | -3.398240 | 1.134020  | -2.283277 |
| H | 0.270734  | -2.599962 | -0.365502 |
| H | 2.385654  | -3.413466 | -0.267678 |
| H | 3.145252  | 1.717728  | -0.536871 |
| H | -4.771566 | -3.003376 | 2.266731  |
| H | -4.698296 | -2.967600 | 0.485333  |
| H | -3.217631 | -3.299926 | 1.440644  |
| H | -6.842457 | 0.636624  | -1.280438 |
| H | -5.494787 | 1.786303  | -1.469771 |
| H | -5.584963 | 0.330650  | -2.505458 |
| H | -0.375397 | -1.600950 | 3.379488  |
| H | -0.157675 | -0.117088 | 2.407785  |

|   |           |           |           |
|---|-----------|-----------|-----------|
| H | -1.756494 | -0.498902 | 3.118862  |
| H | 5.810467  | -4.043070 | -0.182815 |
| H | 4.284821  | -4.042211 | 0.740811  |
| H | 4.264995  | -4.305521 | -1.030398 |
| H | 2.539233  | 5.105867  | 1.219315  |
| H | 1.912424  | 4.810764  | 2.861900  |
| H | 3.350104  | 3.955549  | 2.301290  |

# Hexacyclinol - Method 1

| conf # | Boltzmann pop. (%) | Relative Energy (kcal/mol) |
|--------|--------------------|----------------------------|
| 7      | 38.93              | 0.0                        |
| 8      | 22.01              | 0.34                       |
| 5      | 14.2               | 0.6                        |
| 2      | 12.99              | 0.65                       |
| 3      | 4.72               | 1.25                       |
| 1      | 2.33               | 1.67                       |
| 39     | 1.98               | 1.76                       |
| 24     | 1.08               | 2.12                       |
| 11     | 0.54               | 2.54                       |
| 29     | 0.44               | 2.66                       |
| 21     | 0.35               | 2.79                       |
| 25     | 0.16               | 3.24                       |
| 16     | 0.13               | 3.4                        |
| 32     | 0.05               | 3.98                       |
| 9      | 0.04               | 4.03                       |
| 17     | 0.04               | 4.14                       |
| 48     | 0.01               | 5.16                       |
| 50     | 0.0                | 5.31                       |
| 40     | 0.0                | 5.5                        |
| 30     | 0.0                | 5.78                       |
| 43     | 0.0                | 5.98                       |
| 45     | 0.0                | 6.46                       |
| 53     | 0.0                | 7.02                       |
| 47     | 0.0                | 7.14                       |
| 49     | 0.0                | 7.64                       |
| 46     | 0.0                | 7.76                       |
| 42     | 0.0                | 8.37                       |
| 51     | 0.0                | 9.44                       |

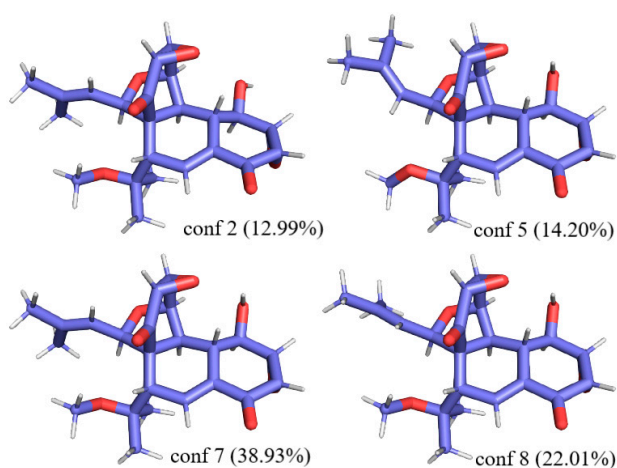

Cartesian Coordinates for Global Minimum of Hexacyclinol (Conf #7)

|   |           |           |           |
|---|-----------|-----------|-----------|
| C | -0.573028 | -0.751724 | -0.663567 |
| C | 0.552650  | -0.160036 | 0.224269  |
| C | 0.345561  | 1.356803  | 0.513972  |
| C | -1.122258 | 1.634088  | 0.731659  |
| C | -2.156860 | 0.822496  | 0.448925  |
| C | -1.981772 | -0.592194 | -0.076223 |
| C | -3.525499 | 1.270769  | 0.847994  |
| C | -4.688175 | 0.544646  | 0.222420  |
| C | -4.461971 | -0.573086 | -0.718965 |
| C | -3.062031 | -1.075034 | -1.065499 |
| C | 0.026616  | -2.128205 | -0.988530 |
| O | 1.375848  | -1.813357 | -1.349152 |
| C | 1.820426  | -0.632879 | -0.601735 |
| C | 0.123282  | -3.064914 | 0.208803  |
| C | 0.573654  | -0.926712 | 1.573016  |
| C | 0.417948  | -2.441780 | 1.507826  |
| O | -0.891182 | -2.990512 | 1.221641  |
| O | 0.820765  | -0.402944 | 2.641456  |
| C | 0.978116  | 2.445857  | -0.441848 |
| O | 2.402923  | 2.268495  | -0.525443 |
| C | 3.183240  | 2.567531  | 0.621902  |
| C | 0.494800  | 2.356353  | -1.895545 |
| C | 0.653408  | 3.859226  | 0.086244  |
| C | 3.071190  | -0.971949 | 0.160574  |
| C | 4.334415  | -0.756311 | -0.242957 |
| C | 5.493524  | -1.237921 | 0.596752  |
| C | 4.735242  | -0.075980 | -1.528766 |
| H | -0.560864 | -0.197910 | -1.609929 |
| O | -3.040175 | -2.497733 | -1.170083 |
| O | -4.759410 | 0.734448  | -1.207914 |
| O | -3.736399 | 2.193110  | 1.620929  |
| H | -2.089272 | -1.244924 | 0.799003  |
| H | 0.815165  | 1.541272  | 1.488573  |
| H | -1.375218 | 2.581139  | 1.200782  |
| H | -5.635017 | 0.656032  | 0.748943  |
| H | -5.256324 | -1.307438 | -0.861923 |
| H | -2.842412 | -0.707967 | -2.075315 |
| H | -0.448635 | -2.617648 | -1.840658 |
| H | 2.039535  | 0.133574  | -1.338312 |
| H | 0.496490  | -4.068423 | 0.007864  |
| H | 0.952475  | -2.972543 | 2.293915  |
| H | 4.214544  | 2.331349  | 0.350582  |
| H | 3.128150  | 3.629003  | 0.895787  |
| H | 2.909888  | 1.957994  | 1.493134  |
| H | 0.904083  | 3.196740  | -2.465203 |
| H | -0.597300 | 2.403475  | -1.944635 |
| H | 0.825778  | 1.437609  | -2.386096 |
| H | -0.385137 | 4.130814  | -0.120479 |
| H | 0.817212  | 3.956208  | 1.164779  |
| H | 1.295964  | 4.581925  | -0.427457 |



|   |           |           |           |
|---|-----------|-----------|-----------|
| H | 2.941069  | -1.511976 | 1.097255  |
| H | 5.160439  | -1.746467 | 1.506607  |
| H | 6.124987  | -1.934202 | 0.027628  |
| H | 6.142150  | -0.400940 | 0.890363  |
| H | 3.908416  | 0.425679  | -2.032973 |
| H | 5.516358  | 0.672110  | -1.340046 |
| H | 5.167925  | -0.808728 | -2.223916 |
| H | -2.944291 | -2.862080 | -0.274074 |

## Hexacyclinol - Method 2

| conf # | Boltzmann pop. (%) | Relative Energy (kcal/mol) |
|--------|--------------------|----------------------------|
| 7      | 56.85              | 0.0                        |
| 2      | 11.7               | 0.94                       |
| 24     | 7.58               | 1.19                       |
| 5      | 6.52               | 1.28                       |
| 8      | 4.56               | 1.49                       |
| 27     | 2.71               | 1.8                        |
| 6      | 2.37               | 1.88                       |
| 11     | 1.93               | 2.0                        |
| 1      | 1.85               | 2.03                       |
| 3      | 1.49               | 2.16                       |
| 29     | 0.62               | 2.67                       |
| 31     | 0.58               | 2.72                       |
| 39     | 0.36               | 3.0                        |
| 16     | 0.24               | 3.23                       |
| 22     | 0.18               | 3.39                       |
| 18     | 0.15               | 3.53                       |
| 25     | 0.1                | 3.77                       |
| 10     | 0.09               | 3.84                       |
| 35     | 0.03               | 4.39                       |
| 20     | 0.02               | 4.7                        |
| 21     | 0.01               | 4.94                       |
| 32     | 0.01               | 4.98                       |
| 9      | 0.01               | 4.98                       |
| 17     | 0.01               | 5.5                        |
| 50     | 0.0                | 5.54                       |
| 37     | 0.0                | 5.78                       |
| 40     | 0.0                | 6.04                       |
| 48     | 0.0                | 6.05                       |
| 34     | 0.0                | 6.19                       |
| 41     | 0.0                | 6.2                        |
| 30     | 0.0                | 6.33                       |
| 43     | 0.0                | 6.56                       |
| 45     | 0.0                | 6.6                        |
| 54     | 0.0                | 7.05                       |
| 53     | 0.0                | 7.13                       |
| 46     | 0.0                | 7.95                       |
| 47     | 0.0                | 7.96                       |
| 49     | 0.0                | 8.02                       |
| 44     | 0.0                | 8.64                       |
| 42     | 0.0                | 8.91                       |
| 51     | 0.0                | 9.55                       |

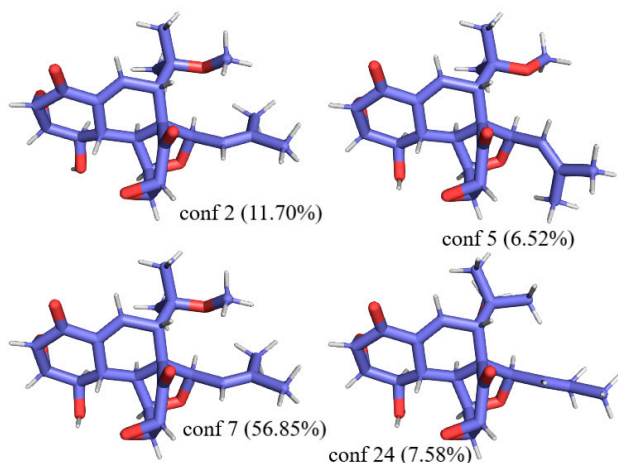

Cartesian Coordinates for Global Minimum of Hexacyclinol (Conf #7)

|   |           |           |           |
|---|-----------|-----------|-----------|
| C | -0.573133 | -0.751521 | -0.668885 |
| C | 0.555849  | -0.185575 | 0.223861  |
| C | 0.369318  | 1.325450  | 0.519168  |
| C | -1.085859 | 1.611222  | 0.775409  |
| C | -2.126449 | 0.815188  | 0.490147  |
| C | -1.976272 | -0.579214 | -0.086086 |
| C | -3.485243 | 1.249908  | 0.922879  |
| C | -4.654774 | 0.572789  | 0.260285  |
| C | -4.440960 | -0.487900 | -0.742523 |
| C | -3.048775 | -0.984846 | -1.110088 |
| C | 0.000669  | -2.132125 | -1.005541 |
| O | 1.359216  | -1.836246 | -1.358884 |
| C | 1.812482  | -0.657364 | -0.606289 |
| C | 0.083809  | -3.079030 | 0.181373  |
| C | 0.566983  | -0.963262 | 1.562180  |
| C | 0.403039  | -2.473775 | 1.479871  |
| O | -0.920485 | -2.987893 | 1.202479  |
| O | 0.792221  | -0.450841 | 2.635200  |
| C | 0.979470  | 2.399374  | -0.458956 |
| O | 2.403471  | 2.219414  | -0.565945 |
| C | 3.195998  | 2.460206  | 0.590974  |
| C | 0.469840  | 2.283617  | -1.897291 |
| C | 0.668756  | 3.816286  | 0.059801  |
| C | 3.056486  | -0.997390 | 0.154568  |
| C | 4.310347  | -0.704924 | -0.213249 |
| C | 5.480663  | -1.166887 | 0.616552  |
| C | 4.689451  | 0.058015  | -1.456965 |
| H | -0.549845 | -0.189486 | -1.605465 |
| O | -3.039407 | -2.399408 | -1.301910 |
| O | -4.720359 | 0.850498  | -1.158135 |
| O | -3.687301 | 2.122184  | 1.748978  |
| H | -2.114320 | -1.260612 | 0.758423  |

|   |           |           |           |
|---|-----------|-----------|-----------|
| H | 0.865918  | 1.515443  | 1.475453  |
| H | -1.316129 | 2.548282  | 1.269681  |
| H | -5.597407 | 0.661408  | 0.792384  |
| H | -5.241561 | -1.201732 | -0.923560 |
| H | -2.815200 | -0.557498 | -2.089522 |
| H | -0.486697 | -2.600804 | -1.858115 |
| H | 2.027384  | 0.106624  | -1.341245 |
| H | 0.434236  | -4.084944 | -0.030348 |
| H | 0.940399  | -3.016915 | 2.251471  |
| H | 4.225602  | 2.263530  | 0.295385  |
| H | 3.121566  | 3.496819  | 0.934421  |
| H | 2.945036  | 1.785062  | 1.415625  |
| H | 0.856255  | 3.120314  | -2.482469 |
| H | -0.621032 | 2.313964  | -1.922857 |
| H | 0.805788  | 1.363953  | -2.375532 |
| H | -0.366308 | 4.091541  | -0.146212 |
| H | 0.838328  | 3.915916  | 1.134067  |
| H | 1.316948  | 4.523379  | -0.462148 |
| H | 2.928688  | -1.594329 | 1.053771  |
| H | 5.169230  | -1.765362 | 1.474651  |
| H | 6.170963  | -1.763268 | 0.009208  |
| H | 6.051566  | -0.306201 | 0.983835  |
| H | 3.865810  | 0.632551  | -1.875806 |
| H | 5.508491  | 0.751298  | -1.241829 |
| H | 5.058219  | -0.636921 | -2.219926 |
| H | -3.030955 | -2.823121 | -0.434781 |

# Homodimericin A - Method 1

| conf # | Boltzmann pop. (%) | Relative Energy (kcal/mol) |
|--------|--------------------|----------------------------|
| 1      | 93.41              | 0.0                        |
| 3      | 4.17               | 1.84                       |
| 4      | 0.95               | 2.72                       |
| 6      | 0.68               | 2.91                       |
| 8      | 0.57               | 3.02                       |
| 12     | 0.14               | 3.86                       |
| 17     | 0.03               | 4.86                       |
| 27     | 0.01               | 5.23                       |
| 16     | 0.01               | 5.4                        |
| 18     | 0.01               | 5.54                       |
| 13     | 0.01               | 5.61                       |
| 25     | 0.01               | 5.63                       |
| 19     | 0.0                | 6.06                       |
| 24     | 0.0                | 6.13                       |
| 29     | 0.0                | 7.27                       |
| 30     | 0.0                | 7.31                       |
| 28     | 0.0                | 7.67                       |
| 26     | 0.0                | 8.0                        |
| 73     | 0.0                | 8.31                       |
| 39     | 0.0                | 8.33                       |
| 33     | 0.0                | 8.43                       |
| 41     | 0.0                | 8.46                       |
| 48     | 0.0                | 8.99                       |
| 36     | 0.0                | 9.17                       |
| 43     | 0.0                | 9.78                       |
| 59     | 0.0                | 10.09                      |
| 46     | 0.0                | 10.2                       |
| 49     | 0.0                | 10.38                      |
| 63     | 0.0                | 10.79                      |
| 50     | 0.0                | 10.84                      |
| 61     | 0.0                | 10.94                      |
| 53     | 0.0                | 10.97                      |
| 64     | 0.0                | 11.01                      |
| 54     | 0.0                | 11.43                      |
| 56     | 0.0                | 11.62                      |
| 67     | 0.0                | 12.36                      |
| 69     | 0.0                | 12.57                      |
| 70     | 0.0                | 13.03                      |
| 77     | 0.0                | 14.62                      |

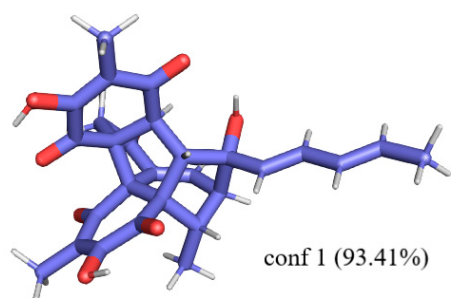

Cartesian Coordinates for Global Minimum of Homodimericin A (Conf #1)

|   |           |           |           |
|---|-----------|-----------|-----------|
| C | 2.086558  | 2.796111  | -0.627908 |
| C | 0.908340  | 3.434672  | -0.381211 |
| C | -0.139253 | 2.718454  | 0.358316  |
| C | 0.081204  | 1.282944  | 0.798720  |
| C | 1.528558  | 0.723345  | 0.832820  |
| C | 2.447652  | 1.436401  | -0.130683 |
| C | -0.778791 | 0.322241  | -0.091524 |
| C | 0.122593  | -0.902071 | -0.447144 |
| C | 1.261300  | -0.826676 | 0.581438  |
| C | -2.037090 | -0.271155 | 0.673139  |
| C | -1.518092 | -1.705736 | 1.083254  |
| C | -0.800911 | -2.157475 | -0.198383 |
| C | 0.615228  | -0.925642 | -1.869498 |
| C | 1.961293  | -1.483008 | -2.160393 |
| C | 2.848902  | -1.853703 | -1.197692 |
| C | 2.533606  | -1.606868 | 0.223904  |
| O | -0.082672 | -0.591119 | -2.826676 |
| C | -0.136743 | -3.535005 | -0.136541 |
| O | 2.227880  | -1.596084 | -3.473897 |
| C | 4.189005  | -2.444933 | -1.513661 |
| O | 3.288129  | -1.980736 | 1.113761  |
| O | 3.548834  | 1.004563  | -0.467559 |
| O | -1.237338 | 3.226689  | 0.585105  |
| O | 3.052586  | 3.372316  | -1.357168 |
| C | 0.641619  | 4.822105  | -0.886810 |
| C | 2.179184  | 0.745559  | 2.252704  |
| C | 1.553923  | -0.458669 | 2.990547  |
| C | 0.746081  | -1.182865 | 1.971536  |
| C | -0.521424 | -1.555229 | 2.209030  |
| O | 1.631809  | -0.667194 | 4.180461  |
| H | -1.114607 | 0.828367  | -0.998950 |
| O | -2.366124 | 0.444711  | 1.852974  |
| C | -3.228798 | -0.347376 | -0.259015 |
| C | -4.503091 | -0.176700 | 0.134817  |
| C | -5.652306 | -0.237963 | -0.752863 |
| C | -6.922606 | -0.071249 | -0.346476 |

|   |           |           |           |
|---|-----------|-----------|-----------|
| C | -8.129113 | -0.131507 | -1.233002 |
| H | -0.332198 | 1.241662  | 1.808292  |
| H | -2.352608 | -2.355331 | 1.361830  |
| H | -1.528468 | -2.174580 | -1.016718 |
| H | 0.339097  | -3.797030 | -1.086986 |
| H | -0.899640 | -4.295165 | 0.067291  |
| H | 0.616283  | -3.605609 | 0.653109  |
| H | 1.420284  | -1.264809 | -3.927223 |
| H | 4.247010  | -2.769759 | -2.554089 |
| H | 4.974159  | -1.699724 | -1.333048 |
| H | 4.396899  | -3.286629 | -0.846230 |
| H | 3.785591  | 2.715131  | -1.381272 |
| H | 1.466526  | 5.496848  | -0.633767 |
| H | 0.551444  | 4.827060  | -1.980600 |
| H | -0.289307 | 5.199286  | -0.460210 |
| H | 3.261968  | 0.598249  | 2.184413  |
| H | 1.989288  | 1.672586  | 2.802328  |
| H | -0.873279 | -1.595441 | 3.236642  |
| H | -2.534327 | 1.369836  | 1.587925  |
| H | -3.016572 | -0.541030 | -1.309937 |
| H | -4.701119 | 0.027750  | 1.186156  |
| H | -5.451989 | -0.433090 | -1.807592 |
| H | -7.108973 | 0.124589  | 0.710844  |
| H | -7.856065 | -0.328947 | -2.274938 |
| H | -8.822892 | -0.918760 | -0.907015 |
| H | -8.692307 | 0.811360  | -1.200781 |

# Homodimericin A - Method 2

| conf # | Boltzmann pop. (%) | Relative Energy (kcal/mol) |
|--------|--------------------|----------------------------|
| 1      | 58.81              | 0.0                        |
| 2      | 33.68              | 0.33                       |
| 5      | 3.1                | 1.74                       |
| 3      | 2.92               | 1.78                       |
| 6      | 0.68               | 2.64                       |
| 10     | 0.25               | 3.22                       |
| 9      | 0.24               | 3.27                       |
| 8      | 0.15               | 3.52                       |
| 7      | 0.1                | 3.79                       |
| 17     | 0.01               | 5.16                       |
| 21     | 0.01               | 5.17                       |
| 15     | 0.01               | 5.33                       |
| 16     | 0.01               | 5.37                       |
| 20     | 0.01               | 5.42                       |
| 13     | 0.01               | 5.53                       |
| 25     | 0.0                | 5.57                       |
| 18     | 0.0                | 5.59                       |
| 19     | 0.0                | 5.75                       |
| 24     | 0.0                | 6.04                       |
| 32     | 0.0                | 6.43                       |
| 31     | 0.0                | 6.45                       |
| 29     | 0.0                | 7.04                       |
| 23     | 0.0                | 7.1                        |
| 39     | 0.0                | 7.39                       |
| 28     | 0.0                | 7.54                       |
| 36     | 0.0                | 7.77                       |
| 40     | 0.0                | 7.87                       |
| 26     | 0.0                | 7.94                       |
| 27     | 0.0                | 8.05                       |
| 55     | 0.0                | 8.6                        |
| 42     | 0.0                | 8.64                       |
| 33     | 0.0                | 8.73                       |
| 43     | 0.0                | 9.0                        |
| 35     | 0.0                | 9.16                       |
| 59     | 0.0                | 9.19                       |
| 47     | 0.0                | 9.32                       |
| 48     | 0.0                | 9.53                       |
| 51     | 0.0                | 9.75                       |
| 50     | 0.0                | 10.71                      |
| 46     | 0.0                | 10.87                      |
| 49     | 0.0                | 10.88                      |
| 61     | 0.0                | 10.91                      |
| 65     | 0.0                | 11.01                      |
| 63     | 0.0                | 11.08                      |
| 54     | 0.0                | 11.24                      |
| 72     | 0.0                | 11.44                      |
| 53     | 0.0                | 11.45                      |



|    |     |       |
|----|-----|-------|
| 64 | 0.0 | 11.57 |
| 56 | 0.0 | 11.64 |
| 67 | 0.0 | 11.82 |
| 75 | 0.0 | 12.07 |
| 69 | 0.0 | 12.33 |
| 78 | 0.0 | 13.0  |
| 70 | 0.0 | 13.1  |
| 77 | 0.0 | 13.48 |

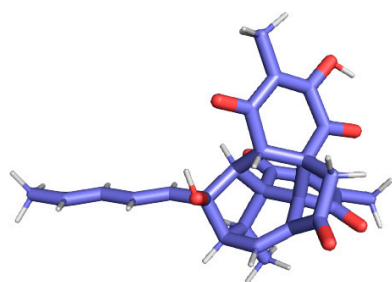

conf 1 (58.81%)

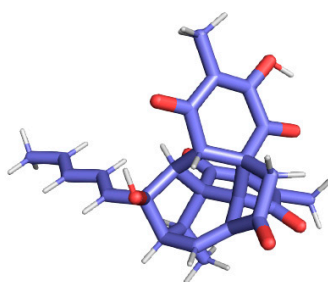

conf 2 (33.68%)

Cartesian Coordinates for Global Minimum of Homodimericin A (Conf #1)

|   |           |           |           |
|---|-----------|-----------|-----------|
| C | 2.065065  | 2.773814  | -0.553043 |
| C | 0.894110  | 3.405081  | -0.271916 |
| C | -0.137958 | 2.692621  | 0.487128  |
| C | 0.072617  | 1.248002  | 0.879086  |
| C | 1.516162  | 0.687577  | 0.888116  |
| C | 2.441272  | 1.423006  | -0.050072 |
| C | -0.783641 | 0.332460  | -0.054191 |
| C | 0.125801  | -0.856827 | -0.477556 |
| C | 1.252250  | -0.841445 | 0.559968  |
| C | -2.033926 | -0.319565 | 0.670877  |
| C | -1.506710 | -1.771870 | 0.987339  |
| C | -0.777852 | -2.132360 | -0.314278 |
| C | 0.626166  | -0.783614 | -1.891908 |
| C | 1.973562  | -1.325905 | -2.201304 |
| C | 2.845382  | -1.758362 | -1.255607 |
| C | 2.522881  | -1.599321 | 0.171167  |
| O | -0.061395 | -0.377471 | -2.818733 |
| C | -0.082448 | -3.491824 | -0.333003 |
| O | 2.270331  | -1.361979 | -3.510036 |
| C | 4.186915  | -2.323464 | -1.597767 |
| O | 3.267975  | -2.020536 | 1.042364  |
| O | 3.541689  | 0.995153  | -0.366782 |
| O | -1.214408 | 3.214573  | 0.755073  |
| O | 3.007779  | 3.356792  | -1.303611 |
| C | 0.598510  | 4.788892  | -0.760773 |
| C | 2.157844  | 0.639473  | 2.304123  |
| C | 1.528586  | -0.592269 | 2.977761  |

|   |           |           |           |
|---|-----------|-----------|-----------|
| C | 0.733102  | -1.272395 | 1.924608  |
| C | -0.525884 | -1.674692 | 2.129774  |
| O | 1.602770  | -0.860187 | 4.153445  |
| H | -1.124054 | 0.882696  | -0.929554 |
| O | -2.370978 | 0.315237  | 1.895291  |
| C | -3.218108 | -0.353311 | -0.268438 |
| C | -4.490693 | -0.197284 | 0.122732  |
| C | -5.632974 | -0.222218 | -0.774168 |
| C | -6.902339 | -0.071417 | -0.369374 |
| C | -8.102592 | -0.095900 | -1.263706 |
| H | -0.335348 | 1.172041  | 1.885640  |
| H | -2.333553 | -2.444004 | 1.217691  |
| H | -1.498667 | -2.114976 | -1.134381 |
| H | 0.409154  | -3.672088 | -1.290919 |
| H | -0.825972 | -4.279021 | -0.186596 |
| H | 0.664212  | -3.591537 | 0.456180  |
| H | 1.489904  | -1.011185 | -3.977398 |
| H | 4.249227  | -2.596875 | -2.649714 |
| H | 4.961451  | -1.580098 | -1.381103 |
| H | 4.398571  | -3.192833 | -0.972664 |
| H | 3.758326  | 2.733731  | -1.336852 |
| H | 1.515381  | 5.352340  | -0.931938 |
| H | 0.046820  | 4.746525  | -1.706502 |
| H | -0.034959 | 5.310853  | -0.043076 |
| H | 3.236328  | 0.482651  | 2.230175  |
| H | 1.972379  | 1.538650  | 2.892667  |
| H | -0.890700 | -1.770141 | 3.146148  |
| H | -2.580504 | 1.239960  | 1.696514  |
| H | -2.997757 | -0.509266 | -1.321010 |
| H | -4.695984 | -0.037181 | 1.178318  |
| H | -5.426554 | -0.375089 | -1.832688 |
| H | -7.094312 | 0.081934  | 0.691803  |
| H | -7.826199 | -0.251008 | -2.309290 |
| H | -8.794653 | -0.893157 | -0.969091 |
| H | -8.663244 | 0.843139  | -1.191909 |

### Sungucine - Method 1

| conf # | Boltzmann pop. (%) | Relative Energy (kcal/mol) |
|--------|--------------------|----------------------------|
| 3      | 94.99              | 0.0                        |
| 1      | 3.88               | 1.89                       |
| 25     | 0.56               | 3.04                       |
| 12     | 0.33               | 3.36                       |
| 6      | 0.15               | 3.8                        |
| 21     | 0.05               | 4.46                       |
| 5      | 0.03               | 4.75                       |
| 41     | 0.01               | 5.49                       |
| 27     | 0.0                | 6.5                        |
| 45     | 0.0                | 6.78                       |
| 43     | 0.0                | 8.17                       |

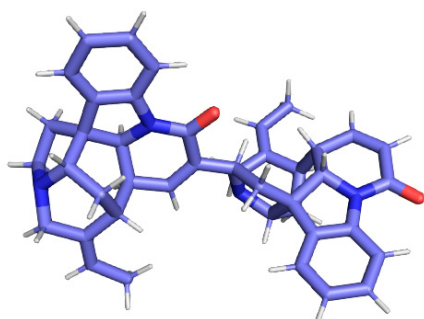

conf 3 (94.99%)

### Cartesian Coordinates for Global Minimum of Sungucine (Conf #3)

|   |           |           |           |
|---|-----------|-----------|-----------|
| C | -5.663318 | -3.354471 | -2.664317 |
| C | -4.335848 | -3.658814 | -2.974917 |
| C | -3.270963 | -3.016420 | -2.335347 |
| C | -3.579947 | -2.057761 | -1.367614 |
| C | -4.907590 | -1.738993 | -1.046861 |
| C | -5.952621 | -2.384608 | -1.697419 |
| N | -2.710114 | -1.271013 | -0.584703 |
| C | -3.480030 | -0.602955 | 0.495280  |
| C | -4.957455 | -0.623353 | -0.021460 |
| C | -1.337125 | -1.263573 | -0.640225 |
| C | -0.664256 | -0.292727 | 0.272363  |
| C | -1.367313 | 0.629272  | 0.947273  |
| C | -2.868489 | 0.752757  | 0.898686  |
| C | -3.325213 | 1.998300  | 0.027946  |
| C | -4.169626 | 1.530331  | -1.170856 |
| C | -5.380340 | 0.746033  | -0.645566 |
| N | -6.095106 | 1.470861  | 0.435402  |
| C | -6.176006 | 0.638243  | 1.639253  |
| C | -5.987044 | -0.786962 | 1.114472  |
| C | -2.199800 | 4.239001  | 1.934769  |

|   |           |           |           |
|---|-----------|-----------|-----------|
| C | -3.645171 | 3.917998  | 1.673174  |
| C | -4.149261 | 2.987879  | 0.850837  |
| O | -0.693755 | -1.971813 | -1.418101 |
| C | -5.655828 | 2.846704  | 0.647439  |
| H | -3.420058 | -1.257631 | 1.378593  |
| H | -3.205693 | 0.944898  | 1.923106  |
| C | 4.130923  | 3.731002  | -2.382305 |
| C | 5.453517  | 3.334087  | -2.594079 |
| C | 5.921925  | 2.091823  | -2.154977 |
| C | 5.017758  | 1.254724  | -1.497090 |
| C | 3.687691  | 1.640129  | -1.273601 |
| C | 3.242315  | 2.881012  | -1.713312 |
| N | 5.227871  | -0.029221 | -0.958930 |
| C | 3.919196  | -0.642848 | -0.611974 |
| C | 2.949554  | 0.578250  | -0.479456 |
| C | 6.409355  | -0.737685 | -0.954062 |
| C | 6.332857  | -2.055423 | -0.275431 |
| C | 5.270722  | -2.447468 | 0.438885  |
| C | 4.018329  | -1.617879 | 0.578169  |
| C | 3.916468  | -0.955731 | 2.016733  |
| C | 2.726800  | 0.998789  | 1.008815  |
| N | 1.452090  | 0.354589  | 1.421753  |
| C | 0.853111  | -0.374492 | 0.295652  |
| C | 1.517148  | 0.260429  | -0.941749 |
| C | 3.540099  | -3.624462 | 3.646387  |
| C | 2.510486  | -2.552659 | 3.418617  |
| C | 2.652706  | -1.400438 | 2.749789  |
| O | 7.461932  | -0.307334 | -1.420560 |
| C | 1.516894  | -0.384501 | 2.683074  |
| H | 3.602333  | -1.233600 | -1.484427 |
| H | 3.167965  | -2.301421 | 0.480947  |
| H | 1.111311  | -1.446189 | 0.316533  |
| C | 3.903011  | 0.579373  | 1.899849  |
| H | -6.473171 | -3.868879 | -3.173848 |
| H | -4.118769 | -4.412308 | -3.727412 |
| H | -2.240793 | -3.245714 | -2.568778 |
| H | -6.985452 | -2.140565 | -1.460622 |
| H | -0.817087 | 1.350390  | 1.548236  |
| H | -2.422932 | 2.493808  | -0.344961 |
| H | -4.497113 | 2.398190  | -1.755141 |
| H | -3.586381 | 0.899956  | -1.849738 |
| H | -6.073400 | 0.545972  | -1.475269 |
| H | -7.142806 | 0.773944  | 2.141631  |
| H | -5.394233 | 0.886449  | 2.380063  |
| H | -6.930512 | -1.158306 | 0.698916  |
| H | -5.662862 | -1.493549 | 1.885446  |
| H | -2.007188 | 5.309650  | 1.784556  |
| H | -1.925652 | 4.018850  | 2.976158  |
| H | -1.515820 | 3.682886  | 1.287707  |
| H | -4.356959 | 4.539510  | 2.220717  |

|   |           |           |           |
|---|-----------|-----------|-----------|
| H | -5.963457 | 3.439335  | -0.226982 |
| H | -6.203968 | 3.263534  | 1.499599  |
| H | 3.790138  | 4.699935  | -2.736184 |
| H | 6.137722  | 3.999413  | -3.114100 |
| H | 6.942756  | 1.773801  | -2.314831 |
| H | 2.214190  | 3.191504  | -1.542743 |
| H | 7.238720  | -2.649240 | -0.344586 |
| H | 5.299580  | -3.392561 | 0.978425  |
| H | 4.799156  | -1.259564 | 2.588834  |
| H | 2.613333  | 2.091344  | 1.043913  |
| H | 0.996980  | 1.192599  | -1.191200 |
| H | 1.468693  | -0.395284 | -1.813667 |
| H | 3.607077  | -3.877448 | 4.712700  |
| H | 3.269312  | -4.553003 | 3.124196  |
| H | 4.539455  | -3.333082 | 3.310525  |
| H | 1.536482  | -2.752240 | 3.870155  |
| H | 1.634440  | 0.347186  | 3.496335  |
| H | 0.549692  | -0.869311 | 2.851634  |
| H | 3.812357  | 1.025714  | 2.897180  |
| H | 4.838278  | 0.956196  | 1.473957  |

## Sungucine - Method 2

| conf # | Boltzmann pop. (%) | Relative Energy (kcal/mol) |
|--------|--------------------|----------------------------|
| 3      | 80.53              | 0.0                        |
| 1      | 14.53              | 1.01                       |
| 6      | 1.45               | 2.38                       |
| 16     | 1.3                | 2.44                       |
| 13     | 0.83               | 2.71                       |
| 25     | 0.64               | 2.87                       |
| 12     | 0.24               | 3.44                       |
| 17     | 0.15               | 3.71                       |
| 21     | 0.15               | 3.73                       |
| 5      | 0.11               | 3.93                       |
| 42     | 0.03               | 4.59                       |
| 41     | 0.01               | 5.09                       |
| 28     | 0.01               | 5.36                       |
| 27     | 0.0                | 5.8                        |
| 45     | 0.0                | 5.81                       |
| 35     | 0.0                | 6.59                       |
| 43     | 0.0                | 7.24                       |

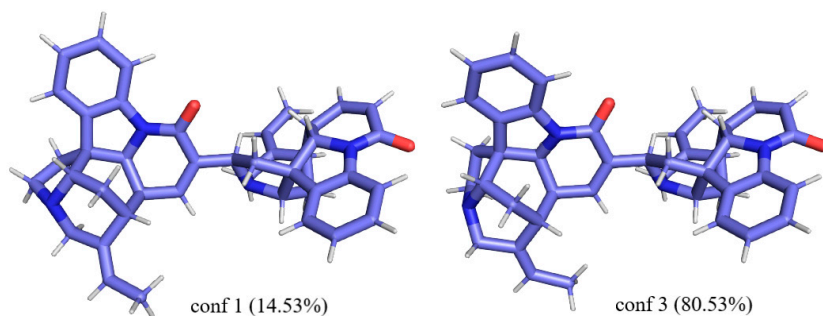

## Cartesian Coordinates for Global Minimum of Sungucine (Conf #3)

|   |           |           |           |
|---|-----------|-----------|-----------|
| C | -5.464495 | -3.580920 | -2.550296 |
| C | -4.130321 | -3.777967 | -2.910193 |
| C | -3.121500 | -3.050633 | -2.276796 |
| C | -3.449804 | -2.158483 | -1.249997 |
| C | -4.786348 | -1.912074 | -0.932000 |
| C | -5.794599 | -2.639638 | -1.573533 |
| N | -2.621170 | -1.287498 | -0.531724 |
| C | -3.431642 | -0.587911 | 0.491772  |
| C | -4.905265 | -0.751075 | 0.034919  |
| C | -1.274166 | -1.370105 | -0.319873 |
| C | -0.659541 | -0.196232 | 0.301174  |
| C | -1.393881 | 0.842692  | 0.766155  |
| C | -2.914502 | 0.869146  | 0.757719  |
| C | -3.531530 | 1.981854  | -0.157404 |
| C | -4.407954 | 1.386225  | -1.283026 |

|   |           |           |           |
|---|-----------|-----------|-----------|
| C | -5.510718 | 0.520656  | -0.622628 |
| N | -6.252587 | 1.242730  | 0.435948  |
| C | -6.227398 | 0.447244  | 1.656751  |
| C | -5.893763 | -0.960766 | 1.188221  |
| C | -2.495011 | 4.446556  | 1.506976  |
| C | -3.942338 | 4.012937  | 1.356517  |
| C | -4.410016 | 2.953586  | 0.662932  |
| O | -0.610804 | -2.339141 | -0.701559 |
| C | -5.917806 | 2.667176  | 0.569817  |
| H | -3.300915 | -1.162474 | 1.411437  |
| H | -3.194876 | 1.090224  | 1.788651  |
| C | 4.076411  | 3.045186  | -3.267393 |
| C | 5.355289  | 2.544342  | -3.515694 |
| C | 5.816185  | 1.429421  | -2.814369 |
| C | 5.000674  | 0.833513  | -1.846111 |
| C | 3.703446  | 1.298047  | -1.630616 |
| C | 3.250721  | 2.423969  | -2.328520 |
| N | 5.233798  | -0.314720 | -1.081522 |
| C | 3.951635  | -0.760930 | -0.461865 |
| C | 2.993993  | 0.460739  | -0.584015 |
| C | 6.443117  | -0.799792 | -0.667624 |
| C | 6.391367  | -1.958288 | 0.185593  |
| C | 5.368934  | -2.232045 | 1.010412  |
| C | 4.095817  | -1.405180 | 0.977412  |
| C | 3.980496  | -0.406537 | 2.180440  |
| C | 2.748674  | 1.228266  | 0.743419  |
| N | 1.479321  | 0.722136  | 1.314544  |
| C | 0.876142  | -0.228473 | 0.378070  |
| C | 1.556721  | 0.069204  | -0.953420 |
| C | 3.662972  | -2.622027 | 4.390172  |
| C | 2.600648  | -1.623435 | 3.967143  |
| C | 2.707739  | -0.674549 | 3.013170  |
| O | 7.529688  | -0.296571 | -0.953859 |
| C | 1.552617  | 0.294307  | 2.719727  |
| H | 3.592199  | -1.543613 | -1.132221 |
| H | 3.281307  | -2.127793 | 1.052981  |
| H | 1.194288  | -1.225054 | 0.693880  |
| C | 3.945565  | 1.064700  | 1.710328  |
| H | -6.245624 | -4.138242 | -3.047377 |
| H | -3.877425 | -4.487939 | -3.684423 |
| H | -2.093040 | -3.202365 | -2.570322 |
| H | -6.835182 | -2.461194 | -1.344450 |
| H | -0.869124 | 1.682583  | 1.199275  |
| H | -2.733508 | 2.551304  | -0.636050 |
| H | -4.852503 | 2.173374  | -1.892672 |
| H | -3.809891 | 0.786892  | -1.970254 |
| H | -6.238911 | 0.205966  | -1.373534 |
| H | -7.208038 | 0.481618  | 2.135163  |
| H | -5.480101 | 0.805410  | 2.367964  |
| H | -6.799743 | -1.478306 | 0.870619  |

|   |           |           |           |
|---|-----------|-----------|-----------|
| H | -5.480064 | -1.576451 | 1.986902  |
| H | -2.371986 | 5.465962  | 1.140738  |
| H | -2.206787 | 4.423852  | 2.558156  |
| H | -1.800091 | 3.813326  | 0.959436  |
| H | -4.654122 | 4.642931  | 1.873032  |
| H | -6.283474 | 3.182565  | -0.319867 |
| H | -6.454344 | 3.099372  | 1.416632  |
| H | 3.721690  | 3.910391  | -3.809122 |
| H | 5.989362  | 3.017251  | -4.251877 |
| H | 6.805445  | 1.044162  | -3.016284 |
| H | 2.260351  | 2.820414  | -2.157812 |
| H | 7.280127  | -2.569391 | 0.208071  |
| H | 5.436250  | -3.089260 | 1.666497  |
| H | 4.846808  | -0.512557 | 2.835690  |
| H | 2.603387  | 2.284840  | 0.506238  |
| H | 1.049918  | 0.895983  | -1.451115 |
| H | 1.508547  | -0.770337 | -1.646988 |
| H | 3.881364  | -2.505717 | 5.451986  |
| H | 3.305310  | -3.638340 | 4.223711  |
| H | 4.597939  | -2.505687 | 3.845898  |
| H | 1.667431  | -1.708009 | 4.507896  |
| H | 1.714531  | 1.179058  | 3.338088  |
| H | 0.596455  | -0.128306 | 3.035490  |
| H | 3.853169  | 1.745706  | 2.556667  |
| H | 4.877843  | 1.338775  | 1.215102  |



## Strychnobailonine - Method 1

| conf # | Boltzmann pop. (%) | Relative Energy (kcal/mol) |
|--------|--------------------|----------------------------|
| 7      | 29.72              | 0.0                        |
| 1      | 16.97              | 0.33                       |
| 14     | 15.91              | 0.37                       |
| 10     | 12.3               | 0.52                       |
| 3      | 12.12              | 0.53                       |
| 2      | 8.39               | 0.75                       |
| 13     | 2.76               | 1.41                       |
| 16     | 1.82               | 1.66                       |
| 8      | 0.0                | 5.93                       |
| 9      | 0.0                | 7.08                       |
| 4      | 0.0                | 7.18                       |

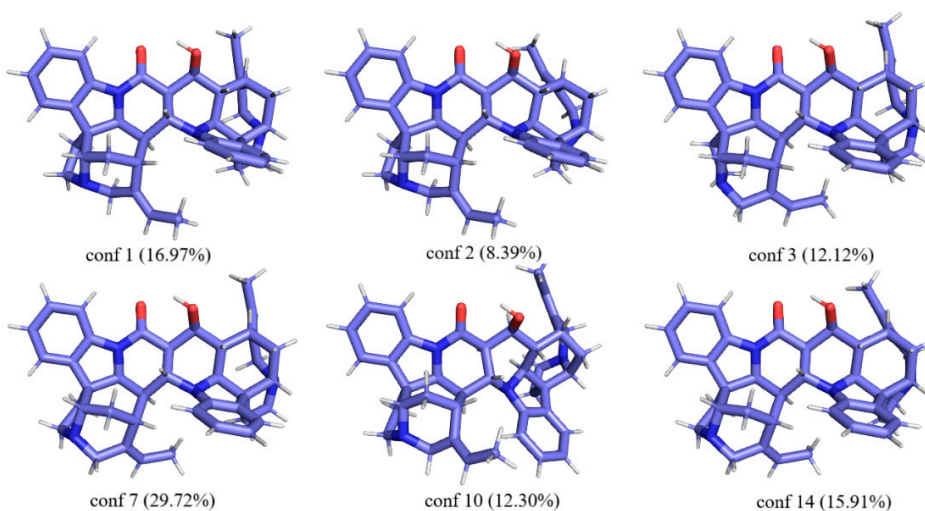

## Cartesian Coordinates for Global Minimum of Strychnobailonine (Conf #7)

|   |           |           |           |
|---|-----------|-----------|-----------|
| C | -6.290935 | 2.826703  | 0.488956  |
| C | -5.320039 | 3.757283  | 0.865205  |
| C | -3.956568 | 3.467178  | 0.758924  |
| C | -3.598094 | 2.211795  | 0.263227  |
| C | -4.556994 | 1.266174  | -0.116543 |
| C | -5.909855 | 1.572692  | -0.000452 |
| N | -2.305408 | 1.669870  | 0.062374  |
| C | -1.122221 | 2.318361  | 0.252955  |
| C | 0.110032  | 1.474299  | -0.061604 |
| C | -0.126278 | 0.019964  | 0.432587  |
| C | -1.272482 | -0.616354 | -0.417596 |
| C | -2.407437 | 0.414844  | -0.733737 |

|   |           |           |           |
|---|-----------|-----------|-----------|
| O | -1.055704 | 3.480173  | 0.669000  |
| C | -1.797216 | -1.943021 | 0.202858  |
| C | -2.888658 | -1.603854 | 1.237205  |
| C | -4.160147 | -1.191482 | 0.494639  |
| C | -3.900486 | -0.026417 | -0.567456 |
| N | -4.745148 | -2.333405 | -0.237857 |
| C | -5.397481 | -1.749984 | -1.411859 |
| C | -4.482464 | -0.607927 | -1.884770 |
| C | -3.773678 | -3.401648 | -0.529787 |
| C | -2.350833 | -2.950387 | -0.815128 |
| C | -1.655584 | -3.512964 | -1.815356 |
| C | -0.200422 | -3.345012 | -2.155462 |
| C | 2.960679  | -3.360716 | 3.034109  |
| C | 1.628187  | -3.033021 | 3.276163  |
| C | 0.925621  | -2.165256 | 2.428742  |
| C | 1.587358  | -1.630128 | 1.320883  |
| C | 2.947245  | -1.931508 | 1.089738  |
| C | 3.625143  | -2.799902 | 1.932466  |
| N | 1.105270  | -0.778759 | 0.310725  |
| C | 2.568154  | 1.160880  | 0.550089  |
| C | 2.298992  | -0.112655 | -0.270930 |
| C | 3.984530  | 1.762743  | 0.371350  |
| C | 4.977582  | 0.696131  | 0.861044  |
| C | 4.853968  | -0.522281 | -0.040519 |
| C | 3.433666  | -1.174925 | -0.132614 |
| N | 5.236996  | -0.220829 | -1.428363 |
| C | 4.850136  | -1.443582 | -2.149597 |
| C | 3.594466  | -2.039169 | -1.422846 |
| C | 4.608954  | 0.988517  | -2.011358 |
| C | 4.387813  | 2.142362  | -1.041707 |
| C | 4.577885  | 3.401395  | -1.466723 |
| C | 4.343490  | 4.686361  | -0.720784 |
| C | 1.416103  | 2.166966  | 0.429984  |
| O | 1.290469  | 2.763967  | 1.709915  |
| H | -0.803488 | -0.854060 | -1.375592 |
| H | -2.293507 | 0.717860  | -1.783332 |
| H | 0.182903  | 1.426087  | -1.160230 |
| H | -0.416884 | 0.065367  | 1.490771  |
| H | 2.105438  | 0.118842  | -1.321727 |
| H | 2.529054  | 0.840038  | 1.599667  |
| H | -7.345013 | 3.074779  | 0.576120  |
| H | -5.622892 | 4.729247  | 1.245126  |
| H | -3.198685 | 4.184256  | 1.039834  |
| H | -6.667423 | 0.848421  | -0.287642 |
| H | -0.949222 | -2.419084 | 0.703677  |
| H | -3.103852 | -2.456926 | 1.890392  |

|   |           |           |           |
|---|-----------|-----------|-----------|
| H | -2.562114 | -0.786375 | 1.890905  |
| H | -4.907270 | -0.821770 | 1.207215  |
| H | -5.577881 | -2.511669 | -2.176328 |
| H | -6.378418 | -1.355778 | -1.110558 |
| H | -4.997958 | 0.154411  | -2.477886 |
| H | -3.673906 | -1.022942 | -2.497531 |
| H | -4.161509 | -4.006181 | -1.355449 |
| H | -3.748933 | -4.070599 | 0.344278  |
| H | -2.190699 | -4.221514 | -2.451022 |
| H | 0.347558  | -2.758939 | -1.414050 |
| H | 0.282544  | -4.328650 | -2.228314 |
| H | -0.070143 | -2.865269 | -3.136720 |
| H | 3.487711  | -4.037087 | 3.700621  |
| H | 1.117579  | -3.450104 | 4.140349  |
| H | -0.105562 | -1.912953 | 2.652434  |
| H | 4.670913  | -3.038290 | 1.751407  |
| H | 4.040400  | 2.639810  | 1.021440  |
| H | 6.006670  | 1.070643  | 0.821401  |
| H | 4.759990  | 0.417946  | 1.898812  |
| H | 5.545845  | -1.303278 | 0.307741  |
| H | 4.671350  | -1.224103 | -3.206719 |
| H | 5.680597  | -2.158609 | -2.103187 |
| H | 3.758604  | -3.089680 | -1.163125 |
| H | 2.693025  | -2.001094 | -2.042831 |
| H | 3.635648  | 0.737038  | -2.473142 |
| H | 5.244525  | 1.328782  | -2.837993 |
| H | 4.945373  | 3.533604  | -2.486520 |
| H | 3.873249  | 4.541307  | 0.255046  |
| H | 5.287268  | 5.228062  | -0.566399 |
| H | 3.695299  | 5.354366  | -1.303570 |
| H | 1.662488  | 2.932455  | -0.323222 |
| H | 0.558435  | 3.405627  | 1.620591  |

## Strychnobailonine - Method 2

| conf # | Boltzmann pop. (%) | Relative Energy (kcal/mol) |
|--------|--------------------|----------------------------|
| 1      | 69.49              | 0.0                        |
| 6      | 8.14               | 1.27                       |
| 2      | 7.92               | 1.29                       |
| 7      | 4.61               | 1.61                       |
| 16     | 4.22               | 1.66                       |
| 10     | 3.01               | 1.86                       |
| 14     | 1.37               | 2.33                       |
| 3      | 0.97               | 2.53                       |
| 13     | 0.27               | 3.29                       |
| 4      | 0.0                | 6.95                       |
| 8      | 0.0                | 7.01                       |
| 9      | 0.0                | 8.31                       |

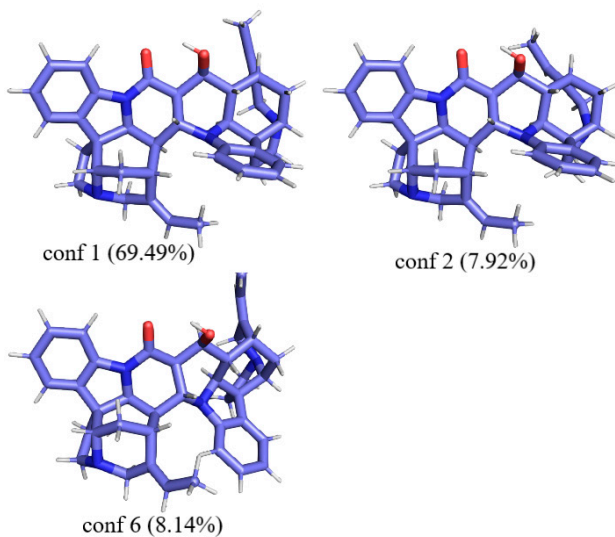

## Cartesian Coordinates for Global Minimum of Strychnobailonine (Conf #7)

|   |           |           |           |
|---|-----------|-----------|-----------|
| C | -6.396128 | 2.283197  | 1.007204  |
| C | -5.483289 | 3.215166  | 1.502504  |
| C | -4.114963 | 3.093280  | 1.252172  |
| C | -3.689090 | 2.004100  | 0.491450  |
| C | -4.590191 | 1.066415  | -0.012256 |
| C | -5.948315 | 1.201416  | 0.245013  |
| N | -2.378477 | 1.630978  | 0.131673  |
| C | -1.236541 | 2.332072  | 0.368782  |
| C | 0.023779  | 1.562537  | -0.002989 |
| C | -0.174516 | 0.099526  | 0.481941  |
| C | -1.254415 | -0.574782 | -0.405835 |

|   |           |           |           |
|---|-----------|-----------|-----------|
| C | -2.388585 | 0.445169  | -0.775095 |
| O | -1.226925 | 3.450050  | 0.886198  |
| C | -1.709208 | -1.932881 | 0.208636  |
| C | -3.070912 | -1.788787 | 0.897991  |
| C | -4.115553 | -1.437382 | -0.145979 |
| C | -3.890777 | -0.021624 | -0.792419 |
| N | -4.200712 | -2.401001 | -1.256435 |
| C | -5.017717 | -1.667457 | -2.234859 |
| C | -4.474727 | -0.213927 | -2.228348 |
| C | -2.894731 | -2.758534 | -1.858481 |
| C | -1.821508 | -3.021509 | -0.836440 |
| C | -1.049976 | -4.110629 | -0.912822 |
| C | 0.118607  | -4.491321 | -0.050609 |
| C | 3.087882  | -3.035289 | 3.168055  |
| C | 1.760644  | -2.723326 | 3.449090  |
| C | 1.002896  | -1.918825 | 2.588777  |
| C | 1.606167  | -1.435916 | 1.427986  |
| C | 2.960154  | -1.722473 | 1.154425  |
| C | 3.693286  | -2.524240 | 2.009400  |
| N | 1.072742  | -0.658531 | 0.398012  |
| C | 2.505279  | 1.297667  | 0.499961  |
| C | 2.212691  | -0.000304 | -0.268072 |
| C | 3.886044  | 1.914648  | 0.189153  |
| C | 4.938083  | 0.889763  | 0.638500  |
| C | 4.767909  | -0.371072 | -0.190056 |
| C | 3.362227  | -1.039205 | -0.136522 |
| N | 5.023394  | -0.131016 | -1.620095 |
| C | 4.586614  | -1.390917 | -2.252288 |
| C | 3.431947  | -1.981396 | -1.371569 |
| C | 4.328963  | 1.046338  | -2.201330 |
| C | 4.142482  | 2.236280  | -1.269227 |
| C | 4.202788  | 3.476961  | -1.767152 |
| C | 3.945350  | 4.775616  | -1.056168 |
| C | 1.323155  | 2.273985  | 0.454548  |
| O | 1.233927  | 2.834923  | 1.761544  |
| H | -0.736152 | -0.799039 | -1.341361 |
| H | -2.157662 | 0.827066  | -1.772523 |
| H | 0.070797  | 1.532972  | -1.099937 |
| H | -0.508195 | 0.127491  | 1.524567  |
| H | 1.965920  | 0.189111  | -1.311916 |
| H | 2.553772  | 0.998420  | 1.553060  |
| H | -7.454061 | 2.399425  | 1.211460  |
| H | -5.837081 | 4.054095  | 2.090895  |
| H | -3.404702 | 3.814474  | 1.624063  |
| H | -6.654475 | 0.476925  | -0.145752 |
| H | -0.969364 | -2.232986 | 0.943550  |

|   |           |           |           |
|---|-----------|-----------|-----------|
| H | -3.338431 | -2.724093 | 1.395135  |
| H | -3.044106 | -1.002942 | 1.660806  |
| H | -5.104927 | -1.421009 | 0.321197  |
| H | -4.969886 | -2.140937 | -3.217257 |
| H | -6.061032 | -1.686991 | -1.905482 |
| H | -5.251545 | 0.519003  | -2.448136 |
| H | -3.693305 | -0.087869 | -2.980701 |
| H | -2.530598 | -1.952913 | -2.522546 |
| H | -3.047017 | -3.634609 | -2.492800 |
| H | -1.271312 | -4.815798 | -1.713477 |
| H | 0.302435  | -3.797955 | 0.767995  |
| H | -0.026160 | -5.490189 | 0.375394  |
| H | 1.034809  | -4.537306 | -0.650715 |
| H | 3.655842  | -3.660412 | 3.846844  |
| H | 1.298539  | -3.103527 | 4.353513  |
| H | -0.024523 | -1.681626 | 2.834779  |
| H | 4.732542  | -2.748956 | 1.793331  |
| H | 3.980788  | 2.818564  | 0.791689  |
| H | 5.949201  | 1.280938  | 0.497541  |
| H | 4.810817  | 0.654933  | 1.698918  |
| H | 5.498271  | -1.121708 | 0.136146  |
| H | 4.287711  | -1.215614 | -3.287272 |
| H | 5.429808  | -2.087305 | -2.269687 |
| H | 3.670831  | -2.998832 | -1.056031 |
| H | 2.473013  | -2.021022 | -1.892023 |
| H | 3.333057  | 0.758535  | -2.574450 |
| H | 4.894324  | 1.363850  | -3.081593 |
| H | 4.456889  | 3.581929  | -2.821646 |
| H | 3.610963  | 4.645964  | -0.026533 |
| H | 4.846257  | 5.399882  | -1.044821 |
| H | 3.175780  | 5.350712  | -1.582919 |
| H | 1.519458  | 3.068375  | -0.278921 |
| H | 0.463229  | 3.424130  | 1.741150  |

# **Paclitaxel - Method 1**

| conf # | Boltzmann pop. (%) | Relative Energy (kcal/mol) |
|--------|--------------------|----------------------------|
| 6      | 27.03              | 0.0                        |
| 2      | 18.92              | 0.21                       |
| 23     | 15.8               | 0.32                       |
| 4      | 15.79              | 0.32                       |
| 21     | 6.88               | 0.81                       |
| 9      | 4.82               | 1.02                       |
| 5      | 2.67               | 1.37                       |
| 1      | 2.66               | 1.37                       |
| 12     | 1.57               | 1.68                       |
| 20     | 1.37               | 1.77                       |
| 3      | 1.25               | 1.82                       |
| 27     | 0.29               | 2.68                       |
| 17     | 0.25               | 2.77                       |
| 11     | 0.2                | 2.91                       |
| 25     | 0.14               | 3.12                       |
| 37     | 0.14               | 3.12                       |
| 51     | 0.12               | 3.2                        |
| 15     | 0.05               | 3.69                       |
| 13     | 0.01               | 4.47                       |
| 10     | 0.01               | 4.69                       |
| 16     | 0.01               | 4.78                       |
| 45     | 0.0                | 5.1                        |
| 52     | 0.0                | 5.45                       |
| 8      | 0.0                | 5.51                       |
| 36     | 0.0                | 5.67                       |
| 22     | 0.0                | 6.02                       |
| 53     | 0.0                | 6.04                       |
| 26     | 0.0                | 6.56                       |
| 35     | 0.0                | 6.58                       |
| 14     | 0.0                | 6.76                       |
| 46     | 0.0                | 6.96                       |
| 43     | 0.0                | 7.22                       |
| 29     | 0.0                | 7.32                       |
| 44     | 0.0                | 7.44                       |
| 50     | 0.0                | 7.57                       |
| 40     | 0.0                | 8.3                        |
| 18     | 0.0                | 8.31                       |
| 49     | 0.0                | 8.45                       |
| 42     | 0.0                | 8.73                       |
| 7      | 0.0                | 8.77                       |
| 28     | 0.0                | 8.86                       |
| 31     | 0.0                | 8.93                       |
| 41     | 0.0                | 9.48                       |
| 39     | 0.0                | 9.79                       |
| 30     | 0.0                | 9.97                       |
| 34     | 0.0                | 10.38                      |
| 33     | 0.0                | 10.47                      |

|    |     |       |
|----|-----|-------|
| 47 | 0.0 | 10.94 |
| 32 | 0.0 | 10.98 |
| 38 | 0.0 | 11.8  |
| 48 | 0.0 | 13.23 |

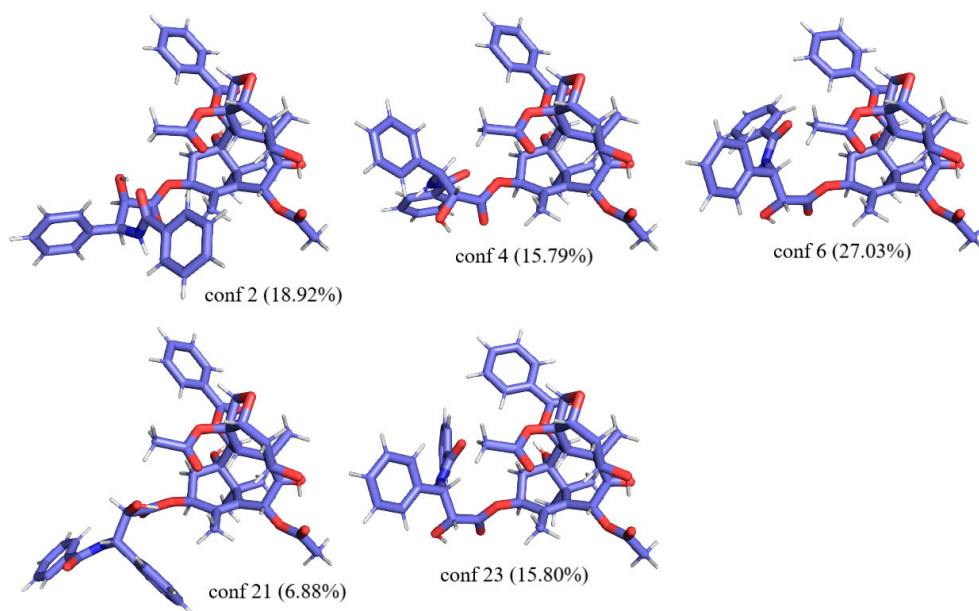

#### Cartesian Coordinates for Global Minimum of Taxol (Conf #6)

|   |           |           |           |
|---|-----------|-----------|-----------|
| C | 1.550727  | -1.985784 | -1.273545 |
| C | 0.196110  | -1.441203 | -1.687162 |
| C | 0.082220  | 0.077391  | -1.462204 |
| C | 1.386676  | 0.885326  | -1.713541 |
| C | 2.459695  | 0.011997  | -2.466841 |
| C | 2.639108  | -1.249286 | -1.600132 |
| C | 1.550168  | -3.285674 | -0.506316 |
| O | -0.869232 | -2.076382 | -0.901342 |
| C | -1.830043 | -2.711530 | -1.578899 |
| C | -2.914432 | -3.320164 | -0.683080 |
| O | -1.872351 | -2.852552 | -2.787630 |
| C | -3.560053 | -2.273475 | 0.243584  |
| O | -3.897919 | -3.898540 | -1.519761 |
| C | -4.473047 | -2.859361 | 1.322447  |
| N | -4.253819 | -1.291651 | -0.586183 |
| C | -4.091324 | 0.055571  | -0.452350 |
| C | -4.909636 | 0.912790  | -1.374397 |
| O | -3.308812 | 0.551615  | 0.366070  |
| C | -6.128957 | 0.493489  | -1.926512 |
| C | -6.846811 | 1.339722  | -2.771102 |
| C | -6.351411 | 2.608987  | -3.075378 |



|   |           |           |           |
|---|-----------|-----------|-----------|
| C | -5.142662 | 3.036013  | -2.520186 |
| C | -4.429662 | 2.196498  | -1.667393 |
| C | -4.867231 | -2.015848 | 2.373632  |
| C | -5.694107 | -2.483984 | 3.392618  |
| C | -6.142115 | -3.807293 | 3.378965  |
| C | -5.761125 | -4.650367 | 2.336359  |
| C | -4.934350 | -4.180998 | 1.311600  |
| C | 3.964771  | -1.555809 | -0.955453 |
| C | 4.645829  | -0.321851 | -0.300465 |
| O | 5.767959  | -0.025885 | -0.653082 |
| C | 3.987842  | 0.378233  | 0.908461  |
| C | 2.420096  | 0.594630  | 0.810510  |
| C | 1.941849  | 1.524063  | -0.371125 |
| C | 1.840125  | 1.052356  | 2.182209  |
| C | 2.619218  | 0.724476  | 3.494942  |
| C | 3.906586  | -0.092827 | 3.453577  |
| C | 4.232194  | -0.676720 | 2.079081  |
| C | 1.992135  | 2.516387  | 2.637736  |
| O | 2.845251  | 2.140819  | 3.737927  |
| O | 0.440937  | 0.684063  | 2.287128  |
| C | 0.130737  | -0.600553 | 2.580446  |
| O | 0.942205  | -1.506832 | 2.591116  |
| C | -1.329634 | -0.725860 | 2.923903  |
| O | 0.855931  | 2.356007  | 0.114174  |
| C | 1.979586  | -0.374583 | -3.897613 |
| C | 3.732032  | 0.848835  | -2.752974 |
| C | 4.795303  | 1.662229  | 1.180433  |
| O | 5.572809  | -1.116743 | 2.151745  |
| O | 4.878431  | -2.133392 | -1.910803 |
| C | 5.938579  | -2.782438 | -1.376148 |
| O | 6.078497  | -2.979224 | -0.183534 |
| C | 6.903794  | -3.225611 | -2.443025 |
| C | 0.831808  | 3.660920  | -0.249901 |
| O | 1.724659  | 4.199486  | -0.884840 |
| C | -0.389200 | 4.356835  | 0.232498  |
| C | -1.474728 | 3.661516  | 0.787435  |
| C | -2.607159 | 4.364447  | 1.197183  |
| C | -2.657562 | 5.754466  | 1.066054  |
| C | -1.575885 | 6.447473  | 0.514431  |
| C | -0.446812 | 5.751196  | 0.092070  |
| O | 0.984573  | 1.976967  | -2.546788 |
| H | 1.986007  | -0.390644 | 0.659440  |
| H | -0.027647 | -1.700970 | -2.720149 |
| H | -0.273858 | 0.240529  | -0.442432 |
| H | -0.684080 | 0.484516  | -2.126419 |
| H | 1.172591  | -3.150762 | 0.514652  |
| H | 0.888578  | -4.007654 | -0.999664 |
| H | 2.539350  | -3.743959 | -0.453806 |
| H | -2.431048 | -4.088225 | -0.059119 |
| H | -2.754440 | -1.726849 | 0.734553  |

|   |           |           |           |
|---|-----------|-----------|-----------|
| H | -3.516116 | -3.885987 | -2.420060 |
| H | -4.856280 | -1.668789 | -1.305080 |
| H | -6.545451 | -0.477868 | -1.673075 |
| H | -7.795498 | 1.009800  | -3.185291 |
| H | -6.909432 | 3.265749  | -3.737323 |
| H | -4.755894 | 4.024957  | -2.749832 |
| H | -3.496376 | 2.519803  | -1.219205 |
| H | -4.524986 | -0.984271 | 2.383821  |
| H | -5.985746 | -1.816799 | 4.199543  |
| H | -6.784482 | -4.175668 | 4.174348  |
| H | -6.110249 | -5.679356 | 2.312212  |
| H | -4.669067 | -4.844808 | 0.495734  |
| H | 3.825254  | -2.283109 | -0.154433 |
| H | 2.751262  | 2.205132  | -0.634016 |
| H | 1.932920  | 0.332931  | 4.252988  |
| H | 3.860991  | -0.923892 | 4.163932  |
| H | 4.734876  | 0.550925  | 3.765168  |
| H | 3.552754  | -1.521318 | 1.897993  |
| H | 1.043571  | 2.953337  | 2.967892  |
| H | 2.500005  | 3.203248  | 1.955162  |
| H | -1.598236 | -1.779688 | 3.008350  |
| H | -1.511473 | -0.232873 | 3.886328  |
| H | -1.949260 | -0.223579 | 2.174821  |
| H | 1.625505  | 0.517789  | -4.419449 |
| H | 2.830376  | -0.787127 | -4.449828 |
| H | 1.189881  | -1.123200 | -3.936571 |
| H | 4.128264  | 1.409863  | -1.908494 |
| H | 4.538674  | 0.212908  | -3.124998 |
| H | 3.492546  | 1.576168  | -3.534997 |
| H | 4.459834  | 2.164387  | 2.087311  |
| H | 5.846698  | 1.399733  | 1.304103  |
| H | 4.733582  | 2.366924  | 0.344311  |
| H | 5.755049  | -1.758985 | 1.440177  |
| H | 7.586471  | -3.970579 | -2.032677 |
| H | 6.372661  | -3.624221 | -3.311440 |
| H | 7.479579  | -2.353555 | -2.773481 |
| H | -1.441675 | 2.582833  | 0.884760  |
| H | -3.450117 | 3.819361  | 1.611604  |
| H | -3.541013 | 6.298332  | 1.390329  |
| H | -1.615631 | 7.528272  | 0.411239  |
| H | 0.399846  | 6.267471  | -0.348324 |
| H | 1.618695  | 2.708307  | -2.446959 |

## Paclitaxel - Method 2

| conf # | Boltzmann pop. (%) | Relative Energy (kcal/mol) |
|--------|--------------------|----------------------------|
| 6      | 43.08              | 0.0                        |
| 23     | 18.2               | 0.51                       |
| 21     | 12.75              | 0.72                       |
| 3      | 11.41              | 0.79                       |
| 4      | 3.46               | 1.49                       |
| 2      | 3.15               | 1.55                       |
| 9      | 2.26               | 1.75                       |
| 5      | 1.43               | 2.02                       |
| 20     | 1.33               | 2.06                       |
| 19     | 1.21               | 2.11                       |
| 27     | 0.84               | 2.33                       |
| 11     | 0.43               | 2.73                       |
| 1      | 0.11               | 3.54                       |
| 35     | 0.1                | 3.59                       |
| 12     | 0.09               | 3.69                       |
| 15     | 0.08               | 3.76                       |
| 16     | 0.02               | 4.49                       |
| 37     | 0.02               | 4.53                       |
| 13     | 0.01               | 5.04                       |
| 10     | 0.01               | 5.15                       |
| 52     | 0.0                | 5.42                       |
| 36     | 0.0                | 5.71                       |
| 22     | 0.0                | 6.07                       |
| 43     | 0.0                | 6.26                       |
| 46     | 0.0                | 6.34                       |
| 8      | 0.0                | 6.4                        |
| 17     | 0.0                | 6.62                       |
| 29     | 0.0                | 6.71                       |
| 14     | 0.0                | 7.45                       |
| 51     | 0.0                | 7.84                       |
| 45     | 0.0                | 7.85                       |
| 41     | 0.0                | 7.86                       |
| 42     | 0.0                | 8.03                       |
| 53     | 0.0                | 8.32                       |
| 26     | 0.0                | 8.38                       |
| 44     | 0.0                | 8.46                       |
| 54     | 0.0                | 8.48                       |
| 32     | 0.0                | 8.8                        |
| 30     | 0.0                | 9.25                       |
| 39     | 0.0                | 9.39                       |
| 40     | 0.0                | 9.43                       |
| 7      | 0.0                | 9.54                       |
| 49     | 0.0                | 9.75                       |
| 34     | 0.0                | 9.94                       |
| 18     | 0.0                | 10.21                      |
| 50     | 0.0                | 10.32                      |
| 28     | 0.0                | 10.4                       |

|    |     |       |
|----|-----|-------|
| 38 | 0.0 | 10.52 |
| 47 | 0.0 | 10.78 |
| 33 | 0.0 | 10.79 |
| 31 | 0.0 | 13.53 |

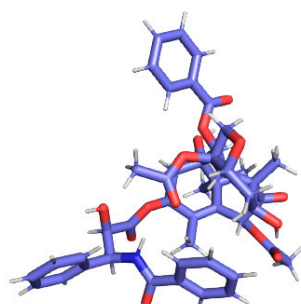

conf 3 (11.41%)

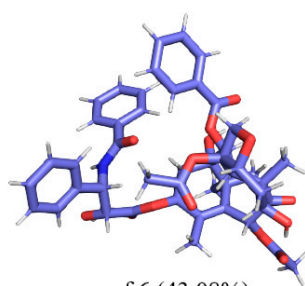

conf 6 (43.08%)

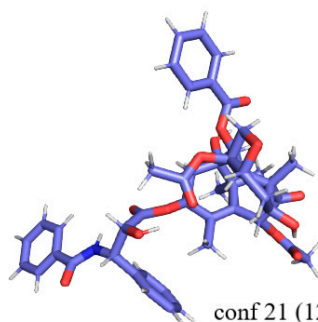

conf 21 (12.75%)

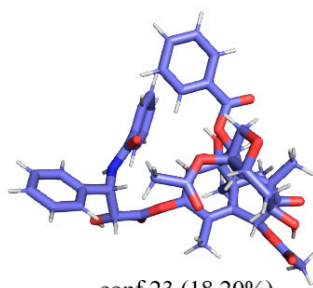

conf 23 (18.20%)

# Cartesian Coordinates for Global Minimum of Taxol (Conf #6)

|   |           |           |           |
|---|-----------|-----------|-----------|
| C | 1.616817  | -2.047600 | -1.136973 |
| C | 0.234092  | -1.634799 | -1.583033 |
| C | -0.022354 | -0.133378 | -1.385549 |
| C | 1.200728  | 0.779340  | -1.644417 |
| C | 2.356334  | -0.005754 | -2.364147 |
| C | 2.633637  | -1.228333 | -1.473743 |
| C | 1.711665  | -3.308339 | -0.322979 |
| O | -0.796367 | -2.341221 | -0.819033 |
| C | -1.722063 | -3.003498 | -1.515161 |
| C | -2.884422 | -3.495525 | -0.650611 |
| O | -1.696274 | -3.207876 | -2.708007 |
| C | -3.459342 | -2.333283 | 0.169059  |
| O | -3.883377 | -4.034122 | -1.497010 |
| C | -4.552331 | -2.705951 | 1.162544  |
| N | -3.886069 | -1.287471 | -0.759572 |
| C | -3.509207 | 0.010502  | -0.614971 |
| C | -3.929652 | 0.957319  | -1.695829 |
| O | -2.830885 | 0.392271  | 0.339390  |
| C | -5.127634 | 0.814798  | -2.404798 |

|   |           |           |           |
|---|-----------|-----------|-----------|
| C | -5.473899 | 1.744266  | -3.382774 |
| C | -4.622635 | 2.812170  | -3.665551 |
| C | -3.427057 | 2.956385  | -2.960842 |
| C | -3.086186 | 2.038917  | -1.973399 |
| C | -5.000573 | -1.702755 | 2.033495  |
| C | -5.978404 | -1.971917 | 2.985064  |
| C | -6.526410 | -3.252098 | 3.082003  |
| C | -6.089797 | -4.252435 | 2.218359  |
| C | -5.109180 | -3.982570 | 1.261515  |
| C | 3.969612  | -1.401385 | -0.813672 |
| C | 4.520479  | -0.108682 | -0.166418 |
| O | 5.612849  | 0.290236  | -0.490470 |
| C | 3.768766  | 0.524159  | 1.020742  |
| C | 2.199799  | 0.596013  | 0.877262  |
| C | 1.680600  | 1.479697  | -0.311385 |
| C | 1.540924  | 0.992509  | 2.225243  |
| C | 2.303961  | 0.732814  | 3.559088  |
| C | 3.665109  | 0.049700  | 3.552378  |
| C | 4.067579  | -0.507830 | 2.192473  |
| C | 1.536448  | 2.461852  | 2.675639  |
| O | 2.373530  | 2.165773  | 3.818354  |
| O | 0.184910  | 0.482642  | 2.290740  |
| C | 0.014104  | -0.828133 | 2.571156  |
| O | 0.922092  | -1.631294 | 2.570992  |
| C | -1.412558 | -1.115676 | 2.928146  |
| O | 0.527685  | 2.223604  | 0.149123  |
| C | 1.935695  | -0.453884 | -3.792241 |
| C | 3.560640  | 0.927485  | -2.632302 |
| C | 4.441143  | 1.875182  | 1.315615  |
| O | 5.441874  | -0.842324 | 2.292526  |
| O | 4.943166  | -1.911051 | -1.748097 |
| C | 6.046417  | -2.462420 | -1.197561 |
| O | 6.192683  | -2.610395 | -0.002543 |
| C | 7.043807  | -2.853426 | -2.247168 |
| C | 0.419065  | 3.530602  | -0.175194 |
| O | 1.267928  | 4.142386  | -0.792031 |
| C | -0.850051 | 4.114959  | 0.323597  |
| C | -1.784142 | 3.350274  | 1.033668  |
| C | -2.974478 | 3.936018  | 1.452146  |
| C | -3.232469 | 5.278041  | 1.174780  |
| C | -2.299296 | 6.041720  | 0.470241  |
| C | -1.110598 | 5.462072  | 0.043568  |
| O | 0.711926  | 1.820022  | -2.499389 |
| H | 1.860934  | -0.419215 | 0.711683  |
| H | 0.075243  | -1.926409 | -2.616652 |
| H | -0.401405 | 0.016057  | -0.375175 |
| H | -0.816958 | 0.180993  | -2.060993 |
| H | 1.310024  | -3.152349 | 0.682343  |
| H | 1.109888  | -4.092067 | -0.790710 |
| H | 2.730858  | -3.682562 | -0.241800 |

|   |           |           |           |
|---|-----------|-----------|-----------|
| H | -2.493630 | -4.258556 | 0.035607  |
| H | -2.629475 | -1.907488 | 0.727340  |
| H | -3.473811 | -4.147568 | -2.367943 |
| H | -4.418124 | -1.585714 | -1.564080 |
| H | -5.809044 | 0.003034  | -2.175799 |
| H | -6.409765 | 1.637869  | -3.918909 |
| H | -4.892916 | 3.531898  | -4.429802 |
| H | -2.761161 | 3.783898  | -3.175673 |
| H | -2.166915 | 2.146369  | -1.415509 |
| H | -4.574142 | -0.708681 | 1.959353  |
| H | -6.310687 | -1.185259 | 3.653170  |
| H | -7.288104 | -3.464959 | 3.823464  |
| H | -6.514344 | -5.248142 | 2.281276  |
| H | -4.801330 | -4.766281 | 0.582307  |
| H | 3.883258  | -2.119805 | 0.000329  |
| H | 2.441197  | 2.212504  | -0.570221 |
| H | 1.639687  | 0.267703  | 4.290038  |
| H | 3.688932  | -0.772470 | 4.269358  |
| H | 4.416899  | 0.776366  | 3.867196  |
| H | 3.465632  | -1.402170 | 1.996656  |
| H | 0.542518  | 2.813624  | 2.958660  |
| H | 2.014131  | 3.180931  | 2.009728  |
| H | -1.599565 | -2.186267 | 2.872915  |
| H | -1.577499 | -0.779776 | 3.956121  |
| H | -2.083727 | -0.557926 | 2.276926  |
| H | 1.581262  | 0.408699  | -4.356581 |
| H | 2.812173  | -0.866903 | -4.296108 |
| H | 1.160567  | -1.213133 | -3.827141 |
| H | 3.885500  | 1.525929  | -1.786895 |
| H | 4.421901  | 0.351555  | -2.970361 |
| H | 3.289971  | 1.623317  | -3.428498 |
| H | 4.024433  | 2.351871  | 2.197810  |
| H | 5.502397  | 1.710617  | 1.491278  |
| H | 4.350787  | 2.560872  | 0.471112  |
| H | 5.686805  | -1.463871 | 1.589702  |
| H | 7.780581  | -3.529856 | -1.819508 |
| H | 6.545378  | -3.309635 | -3.102757 |
| H | 7.544525  | -1.945308 | -2.593797 |
| H | -1.597507 | 2.303091  | 1.221011  |
| H | -3.704449 | 3.339005  | 1.985798  |
| H | -4.162722 | 5.729275  | 1.501195  |
| H | -2.501993 | 7.083789  | 0.252613  |
| H | -0.376362 | 6.034237  | -0.509642 |
| H | 1.332594  | 2.559186  | -2.492180 |

## VI. Density Functionals and Basis Sets Employed

The following density functionals and basis sets that are implemented in Gaussian 16, Revision C.01 [1], were used in this benchmark study.

### A. Exchange Functionals

#### a. Local Density Approximation (LDA)

- **X $\alpha$** : XAlpha exchange,  $(0.7)*\rho^{4/3}$  [39-41]
- **S**: Slater exchange,  $(2/3)*\rho^{4/3}$  [39-41]

#### b. Generalized Gradient Approximation (GGA)

- **B**: Becke's gradient functional (includes Slater exchange) [42]
- **PW91**: Perdew and Wang's gradient functional [43-46]
- **mPW**: modified PW91 gradient functional [47]
- **PBE**: Perdew, Burke, and Ernzerhof's gradient functional [48, 49]
- **G96**: Gill's gradient functional [50, 51]

#### c. Meta-GGA

- **TPSS**: Tao, Perdew, Staroverov, and Scuseria's meta-GGA exchange functional [52]
- **revTPSS**: revised version of TPSS [53, 54]
- **PKZB**: Perdew, Kurth, Zupan, and Blaha's meta-GGA exchange functional [55]
- **BRx**: Exchange component of Becke and Roussel's 1989 meta-GGA functional [56]

### B. Correlation Functionals

#### a. LDA

- **VWN**: Vosko, Wilk, and Nusair correlation functional [57]
- **PL**: Perdew's 1981 local functional [58]

#### b. GGA

- **LYP**: Lee, Yang, and Parr's gradient correlation functional [59, 60]
- **V5LYP**: Lee-Yang-Parr non-local (gradient correction) with VWN5 local functional [57, 59, 60]
- **P86**: Perdew's 1986 gradient correlation functional [61]
- **VP86**: VWN5 local and P86 non-local correlation functional [57, 61]
- **PW91**: Perdew and Wang's 1991 gradient-corrected correlation functional [43-46]
- **PBE**: the correlation component of Perdew, Burke, and Ernzerhof [48, 49]

c. Meta-GGA

- **TPSS**:  $\tau$ -dependent correlation part of TPSS [52]
- **revTPSS**: revised TPSS correlation functional by Perdew *et. al.* [53, 54]
- **PKZB**: Perdew, Kurth, Zupan, and Blaha's meta-GGA [55]
- **BRe**: Becke and Roussel's meta-GGA correlation functional [56]

C. Exchange-Correlation Combinations

a. GGA

- **SOGGA11**: 2011 second-order GGA functional [62]
- **HCTH**, **HCTH/93**, **HCTH/14**: Hamprecht, Cohen, Tozer, and Handy's 15-parameter semi-empirical GGA functionals [63-65]
- **N12**: Minnesota-12 functional with nonseparable gradient approximation (NGA) [66]

b. Hybrid Density Functionals

- **B3LYP**: Becke's 3-parameter hybrid functional with LYP correlation [67]
- **B3PW91**: Becke's 3-parameter hybrid functional with PW91 correlation [67]
- **B1LYP**: Becke's 1-parameter functional using B exchange and LYP correlation [68]
- **O3LYP**: Cohen and Handy's 3-parameter hybrid functional using OPTX exchange [69]
- **X3LYP**: Xu and Goddard's 5-parameter (eXtended) hybrid functional [70]
- **mPW1PW91**: one-parameter hybrid with mPW exchange and PW91 correlation [47]
- **mPW1PBE**: one-parameter hybrid with mPW exchange and PBE correlation [47]
- **mPW1LYP**: one-parameter hybrid with mPW exchange and LYP correlation [47]
- **mPW3PBE**: hybrid functional with three-parameter variant of mPW and PBE correlation [47]
- **PBE0**: Adamo and Barone's hybrid using PBE exchange and correlation [71]
- **PBEh1PBE**: revision of PBE0 using PBEh exchange [72]
- **APF**: Austin-Frisch-Petersson functional [73]
- **APFD**: APF functional with dispersion [73]
- **WC04**, **WP04**: Empirically-optimized functionals for  $^{13}\text{C}$  and  $^1\text{H}$  NMR predictions, respectively [74]
- **SOGGA11X**: The hybrid variant of SOGGA11 [75]
- **B97-1**: Modified B97 functional by Hamprecht, *et. al.* [63]
- **B97-2**: Modified B97 functional by Wilson, *et. al.* [76]
- **B97-D**: Grimme's B97 functional with empirical dispersion [77]
- **B98**: Becke's 1998 modification of the B97 XC functional [78, 79]



c. Meta-GGA

- **VSXC**:  $\tau$ -dependent GGA functional from van Voorhis and Scuseria [80]
- **$\tau$ HCTH**:  $\tau$ -dependent version of HCTH [81]
- **M06-L**: non-hybrid (local) version of M06 [82]
- **M11-L**: non-hybrid (local) version of M11 [83]
- **MN12-L**:  $\tau$ -dependent (local) Minnesota-12 functional [84]
- **MN15-L**: non-hybrid (local) version of MN15 [85]

d. Range-Separated Hybrid

- **CAM-B3LYP**: long-range corrected version of B3LYP [86]
- **LC- $\omega$ PBE**: long-range corrected version of  $\omega$ PBE [87-89]
- **LC- $\omega$ HPBE**: revised version of LC- $\omega$ PBE [90]
- **$\omega$ B97,  $\omega$ B97X,  $\omega$ B97X-D**: Head-Gordon and co-workers' long-range hybrid functionals [91, 92]
- **HISS**: range-separated hybrid functional from Henderson, Izmaylov, Scuseria, and Savin [93]
- **HSE06**: Heyd-Scuseria-Ernzerhof range-separated hybrid functional [90, 94-99]
- **N12-SX**: screened exchange hybrid version of N12 [100]

e. Hybrid Meta-GGA

- **B1B95**: meta-GGA hybrid using Becke's 1-parameter functional with B95 correlation [101]
- **TPSSH**: hybrid version of TPSS [52, 102]
- **$\tau$ HCTHhyb**: hybrid version of  $\tau$ HCTH [81]
- **PW6B95**: Zhao and Truhlar's hybrid meta-GGA functional [103]
- **M05**: Minnesota-05 functional [104]
- **M05-2X**: twice the exchange as M05 [105]
- **M06**: Minnesota-06 functional [106]
- **M06-2X**: twice the exchange as M06 [106]
- **M06-HF**: M06 with 100% HF exchange [107, 108]
- **M08-HX**: Minnesota-08 functional with high exchange [109]
- **MN15**: Minnesota-15 hybrid meta-GGA functional [110]

f. Range-Separated Hybrid Meta-GGA

- **M11**: Minnesota-11 functional [111]
- **MN12-SX**: screened exchange hybrid version of MN12-L [100]

#### D. Basis Sets

In addition to testing density functionals, a set of 40 basis sets were evaluated. These were as follows:

- **Pople-type basis sets:** [1, 112-119] double-zeta (3-21G, 4-31G, 6-21G, and 6-31G) and triple-zeta (6-311G) with addition of diffuse [120] (+ or ++) and polarization [121] (d, p, and f) functions
- **Dunning's correlation consistent basis sets:** [122, 123] cc-pVnZ (where  $n = D$  or  $T$ , for double- and triple-zeta, respectively) and those with additional diffuse functions, aug-cc-pVnZ
- **Truhlar's calendar basis sets:** [124] apr-, may-, jun-, and jul-cc-pVnZ, which sequentially (starting from jul-cc-pVnZ) remove diffuse functions from aug-cc-pVnZ
- **Ahlrich's split valence basis sets:** [125, 126] SV, SVP, TZ, and TZVP
- **2<sup>nd</sup> revised version of Ahlrich's basis sets:** [127, 128] denoted with the prefix "def2" and spanning from double to quadruple zeta with varying sets of polarization functions
- **EPR-II, EPR-III:** [129] Double- and triple-zeta basis sets, respectively, optimized for hyperfine coupling constant calculations
- **MIDI!:** [130] Truhlar's economical basis set, designed for geometry optimizations
- **D95, D95V:** [131] Dunning and Huzinaga full and valence double-zeta basis sets, respectively

## VII. References

1. Frisch, M. J.; Trucks, G. W.; Schlegel, H. B.; Scuseria, G. E.; Robb, M. A.; Cheeseman, J. R.; Scalmani, G.; Barone, V.; Petersson, G. A.; Nakatsuji, H.; Li, X.; Caricato, M.; Marenich, A. V.; Bloino, J.; Janesko, B. G.; Gomperts, R.; Mennucci, B.; Hratchian, H. P.; Ortiz, J. V.; Izmaylov, A. F.; Sonnenberg, J. L.; Williams, F.; Lipparini, F.; Egidi, F.; Goings, J.; Peng, B.; Petrone, A.; Henderson, T.; Ranasinghe, D.; Zakrzewski, V. G.; Gao, J.; Rega, N.; Zheng, G.; Liang, W.; Hada, M.; Ehara, M.; Toyota, K.; Fukuda, R.; Hasegawa, J.; Ishida, M.; Nakajima, T.; Honda, Y.; Kitao, O.; Nakai, H.; Vreven, T.; Throssell, K.; Montgomery Jr., J. A.; Peralta, J. E.; Ogliaro, F.; Bearpark, M. J.; Heyd, J. J.; Brothers, E. N.; Kudin, K. N.; Staroverov, V. N.; Keith, T. A.; Kobayashi, R.; Normand, J.; Raghavachari, K.; Rendell, A. P.; Burant, J. C.; Iyengar, S. S.; Tomasi, J.; Cossi, M.; Millam, J. M.; Klene, M.; Adamo, C.; Cammi, R.; Ochterski, J. W.; Martin, R. L.; Morokuma, K.; Farkas, O.; Foresman, J. B.; Fox, D. J. *Gaussian 16 Rev. C.01*, Wallingford, CT, 2016.
2. Lu, C.; Wu, C.; Ghoreishi, D.; Chen, W.; Wang, L.; Damm, W.; Ross, G. A.; Dahlgren, M. K.; Russell, E.; Von Bargen, C. D. OPLS4: Improving Force Field Accuracy on Challenging Regimes of Chemical Space. *J. Chem. Theory Comput.* **2021**, *17*, 4291-4300.
3. MacroModel, Schrödinger Release 2021-1: MacroModel, Schrödinger, LLC, New York, NY, 2021.
4. Lodewyk, M. W.; Soldi, C.; Jones, P. B.; Olmstead, M. M.; Rita, J.; Shaw, J. T.; Tantillo, D. J. The Correct Structure of Aquatolide - Experimental Validation of a Theoretically-Predicted Structural Revision. *J. Am. Chem. Soc.* **2012**, *134*, 18550-18553.
5. Kelly, D. P.; Giansiracusa, J. J.; Leslie, D. R.; McKern, I. D.; Sinclair, G. C.  $^{13}\text{C}$ - $^1\text{H}$  Coupling Constants in Carbocations. 5.  $^1$  Trishomocyclopropenium Cations Generated from Bicyclo[3.1.0]hex-3-yl, Tricyclo[3.2.1.0 $^{2,4}$ ]oct-8-yl, and Pentacyclo[4.3.0.0 $^{2,4}$ .0 $^{3,8}$ .0 $^{5,7}$ ]non-9-yl Precursors. *J. Org. Chem.* **1988**, *53*, 2497-2504.
6. Guan, Y.; Sowndarya, S. S.; Gallegos, L. C.; St. John, P. C.; Paton, R. S. Real-Time Prediction of  $^1\text{H}$  and  $^{13}\text{C}$  Chemical Shifts with DFT Accuracy Using a 3D Graph Neural Network. *Chem. Sci.* **2021**, *12*, 12012-12026.
7. Deng, Q.; Jiang, L.; Yu, Y.; Yang, Y. Theoretical Exploration of the Mechanism of  $\alpha$ -Pinene Hydrogenation. *J. Organomet. Chem.* **2022**, 980-981, 122513.
8. Lee, S. G.  $\alpha$ -Pinene and Myrtenol: Complete  $^1\text{H}$  NMR Assignment. *Magn. Reson. Chem.* **2002**, *40*, 311-312.
9. Akssira, M.; Mellouki, F.; Salhi, A.; Alilou, H.; Saouf, A.; El Hanbali, F.; Arteaga, J. F.; Barrero, A. F. Naupliolide, a Sesquiterpene Lactone with a Novel Tetracyclic Skeleton from *Nauplius graveolens* Subsp. *odorus*. *Tet. Lett.* **2006**, *47*, 6719-6721.
10. Dong, M.; Cong, B.; Yu, S.-H.; Sauriol, F.; Huo, C.-H.; Shi, Q.-W.; Gu, Y.-C.; Zamir, L. O.; Kiyota, H. Echinopines A and B: Sesquiterpenoids Possessing an Unprecedented Skeleton from *Echinops spinosus*. *Org. Lett.* **2008**, *10*, 701-704.
11. Tiuman, T. S.; Ueda-Nakamura, T.; Garcia Cortez, D. g. A. c.; Dias Filho, B. P.; Morgado-Díaz, J. A.; de Souza, W.; Nakamura, C. V. Antileishmanial Activity of Parthenolide, a Sesquiterpene Lactone Isolated from *Tanacetum parthenium*. *Antimicrob. Agents Chemother.* **2005**, *49*, 176-182.

12. Kutateladze, A. G.; Kuznetsov, D. M.; Beloglazkina, A. A.; Holt, T. Addressing the Challenges of Structure Elucidation in Natural Products Possessing the Oxirane Moiety. *J. Org. Chem.* **2018**, *83*, 8341-8352.
13. Kutateladze, A. G.; Reddy, D. S. High-Throughput *in silico* Structure Validation and Revision of Halogenated Natural Products is Enabled by Parametric Corrections to DFT-Computed  $^{13}\text{C}$  NMR Chemical Shifts and Spin-Spin Coupling Constants. *J. Org. Chem.* **2017**, *82*, 3368-3381.
14. Valdez-Calderón, A.; Torres-Valencia, J. M.; Manríquez-Torres, J. J.; Velázquez-Jiménez, R.; Román-Marín, L. U.; Hernández-Hernández, J. D.; Cerda-García-Rojas, C. M.; Joseph-Nathan, P. An Unusual Diepoxyguaianolide from *Stevia tomentosa*. *Tet. Lett.* **2013**, *54*, 3286-3289.
15. Wood, J. S.; Gordon, W. H.; Morgan, J. B.; Williamson, R. T. Calculated and Experimental  $^1\text{H}$  and  $^{13}\text{C}$  NMR Assignments for Cannabicitran. *Magn. Reson. Chem.* **2022**, *60*, 196-202.
16. Lodewyk, M. W.; Siebert, M. R.; Tantillo, D. J. Computational Prediction of  $^1\text{H}$  and  $^{13}\text{C}$  Chemical Shifts: A Useful Tool for Natural Product, Mechanistic, and Synthetic Organic Chemistry. *Chem. Rev.* **2012**, *112*, 1839-1862.
17. Rigby, J. H.; de Sainte Claire, V.; Cuisiat, S. V.; Heeg, M. J. Synthetic Studies on the Ingenane Diterpenes. Direct Conversion of the *out, out*-Bicyclo[4.4.1]undecane System into a Highly Strained In, out Stereoisomer. *J. Org. Chem.* **1996**, *61*, 7992-7993.
18. Galasso, V.; Kovač, B.; Modelli, A. A Theoretical and Experimental Study on the Molecular and Electronic Structures of Artemisinin and Related Drug Molecules. *Chem. Phys.* **2007**, *335*, 141-154.
19. Zhongshan, W.; Nakashima, T. T.; Kopecky, K. R.; Molina, J. Qinghaosu:  $^1\text{H}$  and  $^{13}\text{C}$  Nuclear Magnetic Resonance Spectral Assignments and Luminescence. *Can. J. Chem.* **1985**, *63*, 3070-3074.
20. Lodewyk, M. W.; Tantillo, D. J. Prediction of the Structure of Nobilisin A Using Computed NMR Chemical Shifts. *J. Nat. Prod.* **2011**, *74*, 1339-1343.
21. Evidente, A.; Abou-Donia, A. H.; Darwish, F. A.; Amer, M. E.; Kassem, F. F.; Hammada, H. A.; Motta, A. Nobilisin A and B, Two Masanane-Type Alkaloids from *Clivia nobilis*. *Phytochemistry* **1999**, *51*, 1151-1155.
22. Marrero, J.; Rodríguez, A. D.; Barnes, C. L. Intricarene, an Unprecedented Trispiropentacyclic Diterpene from the Caribbean Sea Plume *Pseudopterogorgia kallos*. *Org. Lett.* **2005**, *7*, 1877-1880.
23. Bagno, A.; Rastrelli, F.; Saielli, G. Toward the Complete Prediction of the  $^1\text{H}$  and  $^{13}\text{C}$  NMR Spectra of Complex Organic Molecules by DFT Methods: Application to Natural Substances. *Chem. - A Eur. J.* **2006**, *12*, 5514-5525.
24. Semenov, V. A.; Krivdin, L. B. DFT Computational Schemes for  $^1\text{H}$  and  $^{13}\text{C}$  NMR Chemical Shifts of Natural Products, Exemplified by Strychnine. *Magn. Reson. Chem.* **2020**, *58*, 56-64.
25. Martin, G. E.; Hadden, C. E.; Crouch, R. C.; Krishnamurthy, V. ACCORD-HMBC: Advantages and Disadvantages of Static Versus Accordion Excitation. *Magn. Reson. Chem.* **1999**, *37*, 517-528.
26. Semenov, V. A.; Samultsev, D. O.; Krivdin, L. B.  $^1\text{H}$  and  $^{13}\text{C}$  NMR Spectra of *Strychnos* Alkaloids: Selected NMR Updates. *Int. J. Quantum Chem.* **2020**, *120*, e26348.

27. Cherif, A.; Martin, G. E.; Soltero, L. R.; Massiot, G. Configuration and Total Assignment of the  $^1\text{H}$ - and  $^{13}\text{C}$ -NMR Spectra of the Alkaloid Holstiine. *J. Nat. Prod.* **1990**, *53*, 793-802.
28. Pierens, G. K.; Venkatachalam, T.; Reutens, D. C. NMR and DFT Investigations of Structure of Colchicine in Various Solvents Including Density Functional Theory Calculations. *Sci. Rep.* **2017**, *7*, 1-9.
29. Saielli, G.; Bagno, A. Can Two Molecules have the Same NMR Spectrum? Hexacyclinol Revisited. *Org. Lett.* **2009**, *11*, 1409-1412.
30. Rychnovsky, S. D. Predicting NMR Spectra by Computational Methods: Structure Revision of Hexacyclinol. *Org. Lett.* **2006**, *8*, 2895-2898.
31. Williams, A.; Elyashberg, M.; Blinov, K.; Lankin, D.; Martin, G.; Reynolds, W.; Porco Jr, J.; Singleton, C.; Su, S. Applying Computer-Assisted Structure Elucidation Algorithms for the Purpose of Structure Validation: Revisiting the NMR Assignments of Hexacyclinol. *J. Nat. Prod.* **2008**, *71*, 581-588.
32. Semenov, V. A.; Krivdin, L. B. Computational  $^1\text{H}$  and  $^{13}\text{C}$  NMR of Strychnobaillonine: On the Way to Larger Molecules Calculated at Lower Computational Costs. *Magn. Reson. Chem.* **2021**, *59*, 108-116.
33. Tchinda, A. T.; Jansen, O.; Nyemb, J.-N.; Tits, M.; Dive, G.; Angenot, L.; Frederich, M. Strychnobaillonine, an Unsymmetrical Bisindole Alkaloid with an Unprecedented Skeleton from *Strychnos icaja* Roots. *J. Nat. Prod.* **2014**, *77*, 1078-1082.
34. Semenov, V. A.; Krivdin, L. B. Simple and Versatile Scheme for the Stereochemical Identification of Natural Products and Diverse Organic Compounds with Multiple Asymmetric Centers. *J. Phys. Chem. A* **2021**, *125*, 10359-10372.
35. Frederich, M.; De Pauw, M.-C.; Llabres, G.; Tits, M.; Hayette, M.-P.; Brandt, V.; Penelle, J.; De Mol, P.; Angenot, L. New Antimalarial and Cytotoxic Sungucine Derivatives from *Strychnos icaja* Roots. *Planta Med.* **2000**, *66*, 262-269.
36. Lamotte, J.; Dupont, L.; Dideberg, O.; Kambu, K.; Angenot, L. Isolation and Structure of Sungucine: a New Type of Bisindoline Alkaloid. *Tet. Lett.* **1979**, *20*, 4227-4228.
37. Aliev, A. E.; Courtier-Murias, D.; Zhou, S. Scaling Factors for Carbon NMR Chemical Shifts Obtained from DFT B3LYP Calculations. *J. Mol. Struct.: THEOCHEM* **2009**, *893*, 1-5.
38. Chmurny, G. N.; Hilton, B. D.; Brobst, S.; Look, S. A.; Witherup, K. M.; Beutler, J. A.  $^1\text{H}$ - and  $^{13}\text{C}$ -NMR Assignments for Taxol, 7-*epi*-Taxol, and Cephalomannine. *J. Nat. Prod.* **1992**, *55*, 414-423.
39. Hohenberg, P.; Kohn, W. Inhomogeneous Electron Gas. *Phys. Rev.* **1964**, *136*, B864-B871.
40. Kohn, W.; Sham, L. J. Self-Consistent Equations Including Exchange and Correlation Effects. *Phys. Rev.* **1965**, *140*, A1133-A1138.
41. Slater, J. C., *Quantum Theory of Molecules and Solids Vol. 4: The Self-Consistent Field for Molecules and Solids*. McGraw-Hill: New York, 1974.
42. Becke, A. D. Density-Functional Exchange-Energy Approximation with Correct Asymptotic Behavior. *Phys. Rev. A* **1988**, *38*, 3098-3100.
43. Perdew, J. P., In *Electronic Structure of Solids '91*, Ziesche, P.; Eschrig, H., Eds. Akademie Verlag: Berlin, 1991; p 11.
44. Perdew, J. P.; Chevary, J. A.; Vosko, S. H.; Jackson, K. A.; Pederson, M. R.; Singh, D. J.; Fiolhais, C. Atoms, Molecules, Solids, and Surfaces: Applications of the

- Generalized Gradient Approximation for Exchange and Correlation. *Phys. Rev. B* **1992**, *46*, 6671-6687.
45. Perdew, J. P.; Chevary, J.; Vosko, S.; Jackson, K. A.; Pederson, M. R.; Singh, D.; Fiolhais, C. Erratum: Atoms, Molecules, Solids, and Surfaces: Applications of the Generalized Gradient Approximation for Exchange and Correlation. *Phys. Rev. B* **1993**, *48*, 4978.
  46. Perdew, J. P.; Burke, K.; Wang, Y. Generalized Gradient Approximation for the Exchange-Correlation Hole of a Many-Electron System. *Phys. Rev. B* **1996**, *54*, 16533.
  47. Adamo, C.; Barone, V. Exchange Functionals with Improved Long-Range Behavior and Adiabatic Connection Methods without Adjustable Parameters: The mPW and mPW1PW Models. *J. Chem. Phys.* **1998**, *108*, 664-675.
  48. Perdew, J. P.; Burke, K.; Ernzerhof, M. Generalized Gradient Approximation Made Simple. *Phys. Rev. Lett.* **1996**, *77*, 3865-3868.
  49. Perdew, J. P.; Burke, K.; Ernzerhof, M. Erratum: Generalized Gradient Approximation Made Simple. *Phys. Rev. Lett.* **1997**, *78*, 1396.
  50. Gill, P. M. A New Gradient-Corrected Exchange Functional. *Mol. Phys.* **1996**, *89*, 433-445.
  51. Adamo, C.; Barone, V. Implementation and Validation of the Lacks-Gordon Exchange Functional in Conventional Density Functional and Adiabatic Connection Methods. *J. Comput. Chem.* **1998**, *19*, 418-429.
  52. Tao, J.; Perdew, J. P.; Staroverov, V. N.; Scuseria, G. E. Climbing the Density Functional Ladder: Nonempirical Meta-Generalized Gradient Approximation Designed for Molecules and Solids. *Phys. Rev. Lett.* **2003**, *91*, 146401.
  53. Perdew, J. P.; Ruzsinszky, A.; Csonka, G. I.; Constantin, L. A.; Sun, J. Workhorse Semilocal Density Functional for Condensed Matter Physics and Quantum Chemistry. *Phys. Rev. Lett.* **2009**, *103*, 026403.
  54. Perdew, J. P.; Ruzsinszky, A.; Csonka, G. I.; Constantin, L. A.; Sun, J. Erratum: Workhorse Semilocal Density Functional for Condensed Matter Physics and Quantum Chemistry. *Phys. Rev. Lett.* **2011**, *106*, 179902.
  55. Perdew, J. P.; Kurth, S.; Zupan, A.; Blaha, P. Accurate Density Functional with Correct Formal Properties: A Step Beyond the Generalized Gradient Approximation. *Phys. Rev. Lett.* **1999**, *82*, 2544.
  56. Becke, A. D.; Roussel, M. R. Exchange Holes in Inhomogeneous Systems: A Coordinate-Space Model. *Physical Review A* **1989**, *39*, 3761-3767.
  57. Vosko, S. H.; Wilk, L.; Nusair, M. Accurate Spin-Dependent Electron Liquid Correlation Energies for Local Spin Density Calculations: A Critical Analysis. *Can. J. Phys.* **1980**, *58*, 1200-1211.
  58. Perdew, J. P.; Zunger, A. Self-Interaction Correction to Density-Functional Approximations for Many-Electron Systems. *Phys. Rev. B* **1981**, *23*, 5048-5079.
  59. Lee, C.; Yang, W.; Parr, R. G. Development of the Colle-Salvetti Correlation-Energy Formula into a Functional of the Electron Density. *Phys. Rev. B* **1988**, *37*, 785-789.
  60. Miehlich, B.; Savin, A.; Stoll, H.; Preuss, H. Results Obtained with the Correlation Energy Density Functionals of Becke and Lee, Yang and Parr. *Chem. Phys. Lett.* **1989**, *157*, 200-206.
  61. Perdew, J. P. Density-Functional Approximation for the Correlation Energy of the Inhomogeneous Electron Gas. *Phys. Rev. B* **1986**, *33*, 8822-8824.

62. Peverati, R.; Zhao, Y.; Truhlar, D. G. Generalized Gradient Approximation that Recovers the Second-Order Density-Gradient Expansion with Optimized Across-the-Board Performance. *J. Phys. Chem. Lett.* **2011**, *2*, 1991-1997.
63. Hamprecht, F. A.; Cohen, A. J.; Tozer, D. J.; Handy, N. C. Development and Assessment of New Exchange-Correlation Functionals. *J. Chem. Phys.* **1998**, *109*, 6264-6271.
64. Boese, A. D.; Doltsinis, N. L.; Handy, N. C.; Sprik, M. New Generalized Gradient Approximation Functionals. *J. Chem. Phys.* **2000**, *112*, 1670-1678.
65. Boese, A. D.; Handy, N. C. A New Parametrization of Exchange-Correlation Generalized Gradient Approximation Functionals. *J. Chem. Phys.* **2001**, *114*, 5497-5503.
66. Peverati, R.; Truhlar, D. G. Exchange-Correlation Functional with Good Accuracy for Both Structural and Energetic Properties While Depending Only on the Density and its Gradient. *J. Chem. Theory Comput.* **2012**, *8*, 2310-2319.
67. Becke, A. D. Density-Functional Thermochemistry. III. The Role of Exact Exchange. *J. Chem. Phys.* **1993**, *98*, 5648-5652.
68. Adamo, C.; Barone, V. Toward Reliable Adiabatic Connection Models Free from Adjustable Parameters. *Chem. Phys. Lett.* **1997**, *274*, 242-250.
69. Cohen, A. J.; Handy, N. C. Dynamic Correlation. *Mol. Phys.* **2001**, *99*, 607-615.
70. Xu, X.; Goddard III, W. A. The X3LYP Extended Density Functional for Accurate Descriptions of Nonbond Interactions, Spin States, and Thermochemical Properties. *Proc. Natl. Acad. Sci.* **2004**, *101*, 2673-2677.
71. Adamo, C.; Barone, V. Toward Reliable Density Functional Methods without Adjustable Parameters: The PBE0 Model. *J. Chem. Phys.* **1999**, *110*, 6158-6170.
72. Ernzerhof, M.; Scuseria, G. E. Assessment of the Perdew-Burke-Ernzerhof Exchange-Correlation Functional. *J. Chem. Phys.* **1999**, *110*, 5029-5036.
73. Austin, A.; Petersson, G. A.; Frisch, M. J.; Dobek, F. J.; Scalmani, G.; Throssell, K. A Density Functional with Spherical Atom Dispersion Terms. *J. Chem. Theory Comput.* **2012**, *8*, 4989-5007.
74. Wiitala, K. W.; Hoye, T. R.; Cramer, C. J. Hybrid Density Functional Methods Empirically Optimized for the Computation of  $^{13}\text{C}$  and  $^1\text{H}$  Chemical Shifts in Chloroform Solution. *J. Chem. Theory Comput.* **2006**, *2*, 1085-1092.
75. Peverati, R.; Truhlar, D. G. Communication: A Global Hybrid Generalized Gradient Approximation to the Exchange-Correlation Functional that Satisfies the Second-Order Density-Gradient Constraint and has Broad Applicability in Chemistry. *J. Chem. Phys.* **2011**, *135*, 191102.
76. Wilson, P. J.; Bradley, T. J.; Tozer, D. J. Hybrid Exchange-Correlation Functional Determined from Thermochemical Data and *ab initio* Potentials. *J. Chem. Phys.* **2001**, *115*, 9233-9242.
77. Grimme, S. Semiempirical GGA-Type Density Functional Constructed with a Long-Range Dispersion Correction. *J. Comput. Chem.* **2006**, *27*, 1787-1799.
78. Becke, A. D. Density-Functional Thermochemistry. V. Systematic Optimization of Exchange-Correlation Functionals. *J. Chem. Phys.* **1997**, *107*, 8554-8560.
79. Schmider, H. L.; Becke, A. D. Optimized Density Functionals from the Extended G2 Test Set. *J. Chem. Phys.* **1998**, *108*, 9624-9631.
80. Van Voorhis, T.; Scuseria, G. E. A Novel Form for the Exchange-Correlation Energy Functional. *J. Chem. Phys.* **1998**, *109*, 400-410.

81. Boese, A. D.; Handy, N. C. New Exchange-Correlation Density Functionals: The Role of the Kinetic-Energy Density. *J. Chem. Phys.* **2002**, *116*, 9559-9569.
82. Zhao, Y.; Truhlar, D. G. A New Local Density Functional for Main-Group Thermochemistry, Transition Metal Bonding, Thermochemical Kinetics, and Noncovalent Interactions. *J. Chem. Phys.* **2006**, *125*, 194101.
83. Peverati, R.; Truhlar, D. G. M11-L: A Local Density Functional that Provides Improved Accuracy for Electronic Structure Calculations in Chemistry and Physics. *J. Phys. Chem. Lett.* **2012**, *3*, 117-124.
84. Peverati, R.; Truhlar, D. G. An Improved and Broadly Accurate Local Approximation to the Exchange-Correlation Density Functional: The MN12-L Functional for Electronic Structure Calculations in Chemistry and Physics. *Phys. Chem. Chem. Phys.* **2012**, *14*, 13171-13174.
85. Yu, H. S.; He, X.; Truhlar, D. G. MN15-L: A New Local Exchange-Correlation Functional for Kohn-Sham Density Functional Theory with Broad Accuracy for Atoms, Molecules, and Solids. *J. Chem. Theory Comput.* **2016**, *12*, 1280-1293.
86. Yanai, T.; Tew, D. P.; Handy, N. C. A New Hybrid Exchange-Correlation Functional Using the Coulomb-Attenuating Method (CAM-B3LYP). *Chem. Phys. Lett.* **2004**, *393*, 51-57.
87. Vydrov, O. A.; Scuseria, G. E. Assessment of a Long-Range Corrected Hybrid Functional. *J. Chem. Phys.* **2006**, *125*, 234109.
88. Vydrov, O. A.; Heyd, J.; Krukau, A. V.; Scuseria, G. E. Importance of Short-Range Versus Long-Range Hartree-Fock Exchange for the Performance of Hybrid Density Functionals. *J. Chem. Phys.* **2006**, *125*, 074106.
89. Vydrov, O. A.; Scuseria, G. E.; Perdew, J. P. Tests of Functionals for Systems with Fractional Electron Number. *J. Chem. Phys.* **2007**, *126*, 154109.
90. Henderson, T. M.; Izmaylov, A. F.; Scalmani, G.; Scuseria, G. E. Can Short-Range Hybrids Describe Long-Range-Dependent Properties? *J. Chem. Phys.* **2009**, *131*, 044108.
91. Chai, J.-D.; Head-Gordon, M. Long-Range Corrected Hybrid Density Functionals with Damped Atom-Atom Dispersion Corrections. *Phys. Chem. Chem. Phys.* **2008**, *10*, 6615-6620.
92. Chai, J.-D.; Head-Gordon, M. Long-Range Corrected Double-Hybrid Density Functionals. *J. Chem. Phys.* **2009**, *131*, 174105.
93. Henderson, T. M.; Izmaylov, A. F.; Scuseria, G. E.; Savin, A. Assessment of a Middle-Range Hybrid Functional. *J. Chem. Theory Comput.* **2008**, *4*, 1254-1262.
94. Heyd, J.; Scuseria, G. E. Assessment and Validation of a Screened Coulomb Hybrid Density Functional. *J. Chem. Phys.* **2004**, *120*, 7274-7280.
95. Heyd, J.; Scuseria, G. E. Efficient Hybrid Density Functional Calculations in Solids: Assessment of the Heyd-Scuseria-Ernzerhof Screened Coulomb Hybrid Functional. *J. Chem. Phys.* **2004**, *121*, 1187-1192.
96. Heyd, J.; Peralta, J. E.; Scuseria, G. E.; Martin, R. L. Energy Band Gaps and Lattice Parameters Evaluated with the Heyd-Scuseria-Ernzerhof Screened Hybrid Functional. *J. Chem. Phys.* **2005**, *123*, 174101.
97. Heyd, J.; Scuseria, G. E.; Ernzerhof, M. Erratum: "Hybrid Functionals Based on a Screened Coulomb Potential". *J. Chem. Phys.* **2006**, *124*, 219906.



98. Izmaylov, A. F.; Scuseria, G. E.; Frisch, M. J. Efficient Evaluation of Short-Range Hartree-Fock Exchange in Large Molecules and Periodic Systems. *J. Chem. Phys.* **2006**, *125*, 104103.
99. Krukau, A. V.; Vydrov, O. A.; Izmaylov, A. F.; Scuseria, G. E. Influence of the Exchange Screening Parameter on the Performance of Screened Hybrid Functionals. *J. Chem. Phys.* **2006**, *125*, 224106.
100. Peverati, R.; Truhlar, D. G. Screened-Exchange Density Functionals with Broad Accuracy for Chemistry and Solid-State Physics. *Phys. Chem. Chem. Phys.* **2012**, *14*, 16187-16191.
101. Becke, A. D. Density-Functional Thermochemistry. IV. A New Dynamical Correlation Functional and Implications for Exact-Exchange Mixing. *J. Chem. Phys.* **1996**, *104*, 1040-1046.
102. Staroverov, V. N.; Scuseria, G. E.; Tao, J.; Perdew, J. P. Comparative Assessment of a New Nonempirical Density Functional: Molecules and Hydrogen-Bonded Complexes. *J. Chem. Phys.* **2003**, *119*, 12129-12137.
103. Zhao, Y.; Truhlar, D. G. Design of Density Functionals that are Broadly Accurate for Thermochemistry, Thermochemical Kinetics, and Nonbonded Interactions. *J. Phys. Chem. A* **2005**, *109*, 5656-5667.
104. Zhao, Y.; Schultz, N. E.; Truhlar, D. G. Exchange-Correlation Functional with Broad Accuracy for Metallic and Nonmetallic Compounds, Kinetics, and Noncovalent Interactions. *J. Chem. Phys.* **2005**, *123*, 161103.
105. Zhao, Y.; Schultz, N. E.; Truhlar, D. G. Design of Density Functionals by Combining the Method of Constraint Satisfaction with Parametrization for Thermochemistry, Thermochemical Kinetics, and Noncovalent Interactions. *J. Chem. Theory Comput.* **2006**, *2*, 364-382.
106. Zhao, Y.; Truhlar, D. G. The M06 Suite of Density Functionals for Main Group Thermochemistry, Thermochemical Kinetics, Noncovalent Interactions, Excited States, and Transition Elements: Two New Functionals and Systematic Testing of Four M06-Class Functionals and 12 Other Functionals. *Theor. Chem. Acc.* **2008**, *120*, 215-241.
107. Zhao, Y.; Truhlar, D. G. Density Functional for Spectroscopy: No Long-Range Self-Interaction Error, Good Performance for Rydberg and Charge-Transfer States, and Better Performance on Average than B3LYP for Ground States. *J. Phys. Chem. A* **2006**, *110*, 13126-13130.
108. Zhao, Y.; Truhlar, D. G. Comparative DFT Study of van der Waals Complexes: Rare-Gas Dimers, Alkaline-Earth Dimers, Zinc Dimer, and Zinc-Rare-Gas Dimers. *J. Phys. Chem. A* **2006**, *110*, 5121-5129.
109. Zhao, Y.; Truhlar, D. G. Exploring the Limit of Accuracy of the Global Hybrid Meta Density Functional for Main-Group Thermochemistry, Kinetics, and Noncovalent Interactions. *J. Chem. Theory Comput.* **2008**, *4*, 1849-1868.
110. Haoyu, S. Y.; He, X.; Li, S. L.; Truhlar, D. G. MN15: A Kohn-Sham Global-Hybrid Exchange-Correlation Density Functional with Broad Accuracy for Multi-Reference and Single-Reference Systems and Noncovalent Interactions. *Chem. Sci.* **2016**, *7*, 5032-5051.
111. Peverati, R.; Truhlar, D. G. Improving the Accuracy of Hybrid Meta-GGA Density Functionals by Range Separation. *J. Phys. Chem. Lett.* **2011**, *2*, 2810-2817.

112. Ditchfield, R.; Hehre, W. J.; Pople, J. A. Self-Consistent Molecular-Orbital Methods. IX. An Extended Gaussian-Type Basis for Molecular-Orbital Studies of Organic Molecules. *J. Chem. Phys.* **1971**, *54*, 724-728.
113. Dobbs, K.; Hehre, W. Molecular Orbital Theory of the Properties of Inorganic and Organometallic Compounds 4. Extended Basis Sets for Third- and Fourth-Row, Main-Group Elements. *J. Comput. Chem.* **1986**, *7*, 359-378.
114. Gordon, M. S.; Binkley, J. S.; Pople, J. A.; Pietro, W. J.; Hehre, W. J. Self-Consistent Molecular-Orbital Methods. 22. Small Split-Valence Basis Sets for Second-Row Elements. *J. Am. Chem. Soc.* **1982**, *104*, 2797-2803.
115. Hariharan, P. C.; Pople, J. A. The Influence of Polarization Functions on Molecular Orbital Hydrogenation Energies. *Theor. Chim. Acta* **1973**, *28*, 213-222.
116. Hehre, W. J.; Ditchfield, R.; Pople, J. A. Self-Consistent Molecular Orbital Methods. XII. Further Extensions of Gaussian-Type Basis Sets for use in Molecular Orbital Studies of Organic Molecules. *J. Chem. Phys.* **1972**, *56*, 2257-2261.
117. McLean, A.; Chandler, G. Contracted Gaussian Basis Sets for Molecular Calculations. I. Second Row Atoms,  $Z = 11-18$ . *J. Chem. Phys.* **1980**, *72*, 5639-5648.
118. Pietro, W. J.; Francel, M. M.; Hehre, W. J.; DeFrees, D. J.; Pople, J. A.; Binkley, J. S. Self-Consistent Molecular Orbital Methods. 24. Supplemented Small Split-Valence Basis Sets for Second-Row Elements. *J. Am. Chem. Soc.* **1982**, *104*, 5039-5048.
119. Binkley, J. S.; Pople, J. A.; Hehre, W. J. Self-Consistent Molecular Orbital Methods. 21. Small Split-Valence Basis Sets for First-Row Elements. *J. Am. Chem. Soc.* **1980**, *102*, 939-947.
120. Clark, T.; Chandrasekhar, J.; Spitznagel, G. W.; Schleyer, P. V. R. Efficient Diffuse Function-Augmented Basis Sets for Anion Calculations. III. The 3-21+G Basis Set for First-Row Elements, Li-F. *J. Comput. Chem.* **1983**, *4*, 294-301.
121. Frisch, M. J.; Pople, J. A.; Binkley, J. S. Self-Consistent Molecular Orbital Methods 25. Supplementary Functions for Gaussian Basis Sets. *J. Chem. Phys.* **1984**, *80*, 3265-3269.
122. Dunning Jr, T. H. Gaussian Basis Sets for use in Correlated Molecular Calculations. I. The Atoms Boron Through Neon and Hydrogen. *J. Chem. Phys.* **1989**, *90*, 1007-1023.
123. Kendall, R. A.; Dunning Jr, T. H.; Harrison, R. J. Electron Affinities of the First-Row Atoms Revisited. Systematic Basis Sets and Wave Functions. *J. Chem. Phys.* **1992**, *96*, 6796-6806.
124. Papajak, E.; Zheng, J.; Xu, X.; Leverentz, H. R.; Truhlar, D. G. Perspectives on Basis Sets Beautiful: Seasonal Plantings of Diffuse Basis Functions. *J. Chem. Theory Comput.* **2011**, *7*, 3027-3034.
125. Schäfer, A.; Horn, H.; Ahlrichs, R. Fully Optimized Contracted Gaussian Basis Sets for Atoms Li to Kr. *J. Chem. Phys.* **1992**, *97*, 2571-2577.
126. Schäfer, A.; Huber, C.; Ahlrichs, R. Fully Optimized Contracted Gaussian Basis Sets of Triple Zeta Valence Quality for Atoms Li to Kr. *J. Chem. Phys.* **1994**, *100*, 5829-5835.
127. Weigend, F.; Ahlrichs, R. Balanced Basis Sets of Split Valence, Triple Zeta Valence and Quadruple Zeta Valence Quality for H to Rn: Design and Assessment of Accuracy. *Phys. Chem. Chem. Phys.* **2005**, *7*, 3297-3305.
128. Weigend, F. Accurate Coulomb-Fitting Basis Sets for H to Rn. *Phys. Chem. Chem. Phys.* **2006**, *8*, 1057-1065.
129. Barone, V., Structure, Magnetic Properties and Reactivities of Open-Shell Species from Density Functional and Self-Consistent Hybrid Methods. In *Recent Advances in Density*

- Functional Methods, Part I*, Chong, D. P., Ed. World Scientific Publishing Co.: Singapore, 1996.
130. Easton, R. E.; Giesen, D. J.; Welch, A.; Cramer, C. J.; Truhlar, D. G. The MIDI! Basis Set for Quantum Mechanical Calculations of Molecular Geometries and Partial Charges. *Theoretica chimica acta* **1996**, 93, 281-301.
131. Dunning, T. H.; Hay, P. J., Gaussian Basis Sets for Molecular Calculations. In *Methods of Electronic Structure Theory. Modern Theoretical Chemistry*, Schaefer, H. F., Ed. Springer: Boston, 1977; Vol. 3.
